# Supplementary material for: Targeting Cancer Stem Cells in Triple-Negative Breast Cancer
Source: PubMed Central journal article supplement (PMC6678244; doi:10.3390/cancers11070965), 2019-07-09
Supplement: cancers-11-00965-s001.pdf [file cancers-11-00965-s001.pdf]

## Supplementary Methods

### Gene set enrichment analysis (GSEA) of triple negative breast cancer (TNBC)

We obtained the primary gene expression data of breast cancer patients and breast cancer cell lines from Gene Expression Omnibus (GEO; <http://www.ncbi.nlm.nih.gov/geo/>) and analyzed the gene signature with Gene Set Enrichment Analysis (GSEA), as described in our previous report [1]. Briefly, the clinical data of breast cancer patients were obtained from the GEO database under series accession no. GSE27447, and human breast cancer cell line data were obtained from GSE32474. We utilized GEO2R (<https://www.ncbi.nlm.nih.gov/geo/geo2r/>) to compare TNBC and non-TNBC groups to identify differentially expressed genes. From GSE27447, we compared the gene expression profiles of five TNBC patient tumors with those of fourteen non-TNBC patient tumors, and we identified 1972 genes that were differentially expressed between TNBC and non-TNBC patients ( $p$ -value $<5E-02$ , Supplementary Table 1). From the GSE32474 dataset, we compared the genomic signature of TNBC cell lines (BT549, HS578T, and MDA-MB-231) with that of non-TNBC cell lines (MCF7 and T47D), and we identified a total of 653 annotated genes that were differentially expressed between human TNBC and non-TNBC cell lines ( $p$ -value $<1E-08$ , Supplementary Table 2). Then, GSEA of the ranked gene list was performed using the Java implementation of GSEA obtained from <http://www.broadinstitute.org/gsea/> (5000 permutations, minimum term size of 15, and maximum term size of 500). The entire gene lists for TNBC patients as well as for TNBC cell lines were pre-ranked based on the mean fold change. The analysis included gene sets from MSigDB pathways and C2: curated gene sets (c2.all.v6.2.symbols.gmt), and an FDR  $q$ -value  $< 0.05$  was set as the significance threshold.

### Supplementary Tables

**Supplementary Table 1.** Differentially expressed gene list of TNBC patient tumors (n=5) versus non-TNBC patient tumors (n=14).

**Supplementary Table 2.** Differentially expressed gene list of TNBC cell lines (BT549, HS578T, and MDA-MB-231) versus non-TNBC cell lines (MCF7 and T47D).

Supplementary Tables are attached as excel files.

### References

1. Kim J.-H.; Park S.-Y.; Jun Y.; Kim J.-Y.; Nam J.-S. Roles of Wnt Target Genes in the Journey of Cancer Stem Cells. *International Journal of Molecular Sciences* **2017**, *18*, pii: E1604

**Supplementary Table 1.** Differentially expressed gene list of TNBC patient tumors (n=5) versus non-TNBC patient tumors (n=14).

| #  | ID      | Gene.symt:TNBC group | non-TNBC group | logFC   | P.Value  | Gene.title                                                                   |
|----|---------|----------------------|----------------|---------|----------|------------------------------------------------------------------------------|
| 1  | 8103706 | AADAT                | 2.272663       | -3.5244 | 1.667202 | 0.0348422 aminoadipate aminotransferase                                      |
| 2  | 7989953 | AAGAB                | -2.9889457     | -2.4408 | -0.59936 | 0.0075418 alpha- and gamma-adaptin binding protein                           |
| 3  | 8052798 | AAK1                 | 2.220929       | -3.5981 | 0.519726 | 0.0387047 AP2 associated kinase 1                                            |
| 4  | 8100478 | AASDH                | -2.1427178     | -3.7078 | -0.60192 | 0.0452934 aminoadipate-semialdehyde dehydrogenase                            |
| 5  | 8070708 | AATBC                | 2.2450704      | -3.5638 | 0.524513 | 0.0368558 apoptosis associated transcript in bladder cancer                  |
| 6  | 8131682 | ABCB5                | -2.1401391     | -3.7114 | -1.18796 | 0.0455271 ATP binding cassette subfamily B member 5                          |
| 7  | 7975607 | ACOT4                | -2.8771048     | -2.6158 | -1.45266 | 0.0096492 acyl-CoA thioesterase 4                                            |
| 8  | 7952503 | ACRV1                | 2.1522735      | -3.6945 | 0.541704 | 0.0444369 acrosomal vesicle protein 1                                        |
| 9  | 8137474 | ACTR3B               | 2.497213       | -3.196  | 0.932199 | 0.0218645 ARP3 actin related protein 3 homolog B                             |
| 10 | 8092002 | ACTRT3               | 2.1043293      | -3.761  | 0.477936 | 0.0488877 actin related protein T3                                           |
| 11 | 7955535 | ACVR1B               | -3.4919358     | -1.6429 | -0.7804  | 0.0024384 activin A receptor type 1B                                         |
| 12 | 8066431 | ADA                  | 2.5949572      | -3.0493 | 0.613998 | 0.0177718 adenosine deaminase                                                |
| 13 | 7983191 | ADAL                 | -3.6757514     | -1.3502 | -1.13951 | 0.0016052 adenosine deaminase like                                           |
| 14 | 8115490 | ADAM19               | 2.2082558      | -3.616  | 0.784916 | 0.0397089 ADAM metalloproteinase domain 19                                   |
| 15 | 7979927 | ADAM20               | -2.5968716     | -3.0464 | -0.97852 | 0.0176993 ADAM metalloproteinase domain 20                                   |
| 16 | 7979925 | ADAM20P              | -3.1352823     | -2.21   | -1.10773 | 0.0054469 ADAM metalloproteinase domain 20 pseudogene 1                      |
| 17 | 7990736 | ADAMTS7              | 2.7036207      | -2.8839 | 0.471716 | 0.0140756 ADAM metalloproteinase with thrombospondin type 1 motif 7          |
| 18 | 7952752 | ADAMTS8              | 2.267395       | -3.5319 | 0.373428 | 0.0352187 ADAM metalloproteinase with thrombospondin type 1 motif 8          |
| 19 | 8088560 | ADAMTS9              | 2.223479       | -3.5944 | 0.814403 | 0.0385054 ADAM metalloproteinase with thrombospondin type 1 motif 9          |
| 20 | 8132667 | ADCY1                | -2.3826722     | -3.3652 | -2.13113 | 0.0277783 adenylate cyclase 1                                                |
| 21 | 7999079 | ADCY9                | -2.178401      | -3.658  | -0.68505 | 0.0421698 adenylate cyclase 9                                                |
| 22 | 8052882 | ADD2                 | 2.3413871      | -3.4253 | 0.920914 | 0.0302602 adducin 2                                                          |
| 23 | 8157777 | ADGRD2               | 3.0434101      | -2.3551 | 0.753347 | 0.006684 adhesion G protein-coupled receptor D2                              |
| 24 | 7996064 | ADGRG5               | 2.6787531      | -2.9219 | 0.748457 | 0.0148507 adhesion G protein-coupled receptor G5                             |
| 25 | 7902565 | ADGRL2               | 3.1775711      | -2.143  | 1.370978 | 0.0049553 adhesion G protein-coupled receptor L2                             |
| 26 | 8106827 | ADGRV1               | -2.9017974     | -2.5773 | -2.19419 | 0.0091399 adhesion G protein-coupled receptor V1                             |
| 27 | 7928882 | ADIRF                | -2.6158137     | -3.0177 | -1.52148 | 0.0169976 adipogenesis regulatory factor                                     |
| 28 | 7928471 | ADK                  | -2.4563235     | -3.2568 | -0.54747 | 0.0238268 adenosine kinase                                                   |
| 29 | 8005134 | ADORA2B              | 2.5798829      | -3.072  | 0.501918 | 0.0183519 adenosine A2b receptor                                             |
| 30 | 7925550 | ADSS                 | -2.2428494     | -3.5669 | -0.80113 | 0.0370224 adenylosuccinate synthase                                          |
| 31 | 7977273 | ADSSL1               | -3.924199      | -0.9566 | -1.24256 | 0.0009105 adenylosuccinate synthase like 1                                   |
| 32 | 8106429 | AGGF1                | -2.3379787     | -3.4303 | -0.45223 | 0.0304736 angiogenic factor with G-patch and FHA domains 1                   |
| 33 | 8130628 | AGPAT4               | 2.2572734      | -3.5464 | 1.030554 | 0.0359524 1-acylglycerol-3-phosphate O-acyltransferase 4                     |
| 34 | 8138381 | AGR2                 | -3.034222      | -2.3696 | -4.76127 | 0.0068217 anterior gradient 2, protein disulphide isomerase family member    |
| 35 | 8138392 | AGR3                 | -2.8541838     | -2.6514 | -3.82108 | 0.0101462 anterior gradient 3, protein disulphide isomerase family member    |
| 36 | 7896822 | AGRN                 | -3.6272845     | -1.4273 | -1.2464  | 0.0017926 agrin                                                              |
| 37 | 8169492 | AGTR2                | -2.350242      | -3.4125 | -0.79261 | 0.0297122 angiotensin II receptor type 2                                     |
| 38 | 8049737 | AGXT                 | 2.147625       | -3.701  | 0.561296 | 0.0448517 alanine-glyoxylate aminotransferase                                |
| 39 | 8122396 | AIG1                 | -2.8242038     | -2.698  | -0.85036 | 0.0108335 androgen induced 1                                                 |
| 40 | 8011912 | AIPL1                | 2.428713       | -3.2976 | 0.446297 | 0.0252438 aryl hydrocarbon receptor interacting protein like 1               |
| 41 | 8112458 | AK6///TAFI           | -2.1319152     | -3.7228 | -0.37853 | 0.0462798 adenylate kinase 6///TATA-box binding protein associated factor 9  |
| 42 | 8177635 | AK6///TAFI           | -2.1319152     | -3.7228 | -0.37853 | 0.0462798 adenylate kinase 6///TATA-box binding protein associated factor 9  |
| 43 | 8164766 | AK8                  | -2.2637759     | -3.5371 | -0.58121 | 0.0354794 adenylate kinase 8                                                 |
| 44 | 8128777 | AK9                  | -4.3419818     | -0.3051 | -6.19443 | 0.0003509 adenylate kinase 9                                                 |
| 45 | 8128788 | AK9                  | -2.2081295     | -3.6162 | -0.79441 | 0.0397191 adenylate kinase 9                                                 |
| 46 | 7975066 | AKAP5                | -2.1550402     | -3.6907 | -1.10602 | 0.0441917 A-kinase anchoring protein 5                                       |
| 47 | 8163569 | AKNA                 | 2.3821898      | -3.3659 | 0.831578 | 0.0278109 AT-hook transcription factor                                       |
| 48 | 7904084 | AKR7A2P1             | -2.0949187     | -3.7739 | -0.5781  | 0.0498074 aldo-keto reductase family 7 member A2 pseudogene 1                |
| 49 | 7913146 | AKR7A3               | -2.1430004     | -3.7074 | -1.01223 | 0.0452679 aldo-keto reductase family 7 member A3                             |
| 50 | 7994737 | ALDOA                | -2.6232516     | -3.0064 | -0.86986 | 0.0167294 aldolase, fructose-bisphosphate A                                  |
| 51 | 7936923 | ALDOAP2              | -2.1384024     | -3.7138 | -0.76954 | 0.0456851 aldolase, fructose-bisphosphate A pseudogene 2                     |
| 52 | 7969228 | ALG11///U            | -2.5976779     | -3.0452 | -0.49494 | 0.0176689 ALG11, alpha-1,2-mannosyltransferase///UTP14, small subunit proces |
| 53 | 8141757 | ALKBH4               | 2.769381       | -2.7828 | 0.541324 | 0.0122074 alkB homolog 4, lysine demethylase                                 |
| 54 | 8040053 | ALLC                 | 3.2541557      | -2.0215 | 1.017958 | 0.0041729 allantoicase                                                       |
| 55 | 8004221 | ALOX12               | 2.1981782      | -3.6302 | 0.453382 | 0.0405245 arachidonate 12-lipoxygenase, 12S type                             |
| 56 | 8012309 | ALOX12B              | 2.2575772      | -3.546  | 0.439605 | 0.0359302 arachidonate 12-lipoxygenase, 12R type                             |
| 57 | 8001477 | AMFR                 | -2.6542221     | -2.9593 | -0.77238 | 0.0156549 autocrine motility factor receptor                                 |
| 58 | 8090852 | AMOTL2               | -3.0848012     | -2.2898 | -0.7071  | 0.0060961 angiominin like 2                                                  |
| 59 | 8090866 | ANAPC13              | -3.0338613     | -2.3702 | -0.95255 | 0.0068272 anaphase promoting complex subunit 13                              |
| 60 | 8033892 | ANGPTL6              | 2.1121698      | -3.7501 | 0.470955 | 0.0481332 angiopoietin like 6                                                |
| 61 | 8150439 | ANK1                 | 2.3629479      | -3.394  | 0.46731  | 0.028942 ankyrin 1                                                           |
| 62 | 7984227 | ANKDD1A              | 3.0400253      | -2.3605 | 0.497822 | 0.0067344 ankyrin repeat and death domain containing 1A                      |
| 63 | 8060949 | ANKEF1               | -5.0439266     | 0.7419  | -1.35595 | 0.000072 ankyrin repeat and EF-hand domain containing 1                      |
| 64 | 7943943 | ANKK1                | 2.3528345      | -3.4087 | 0.400823 | 0.0295535 ankyrin repeat and kinase domain containing 1                      |
| 65 | 7934979 | ANKRD1               | 2.1881199      | -3.6443 | 0.493973 | 0.0413538 ankyrin repeat domain 1                                            |
| 66 | 7927033 | ANKRD30A             | -3.1461142     | -2.1929 | -6.27253 | 0.0053167 ankyrin repeat domain 30A                                          |
| 67 | 8069499 | ANKRD30E             | -3.3952732     | -1.7969 | -3.55391 | 0.0030354 ankyrin repeat domain 30B                                          |
| 68 | 8112672 | ANKRD31              | 2.493414       | -3.2017 | 0.877722 | 0.0220402 ankyrin repeat domain 31                                           |
| 69 | 8016725 | ANKRD40              | -2.728627      | -2.8455 | -0.59072 | 0.0133352 ankyrin repeat domain 40                                           |
| 70 | 7942858 | ANKRD42              | -2.3024942     | -3.4816 | -1.0422  | 0.0327798 ankyrin repeat domain 42                                           |
| 71 | 7965686 | ANKS1B               | -2.3903619     | -3.3539 | -1.47992 | 0.027343 ankyrin repeat and sterile alpha motif domain containing 1B         |

|     |                   |            |         |          |           |                                                                                |
|-----|-------------------|------------|---------|----------|-----------|--------------------------------------------------------------------------------|
| 72  | 7993815 ANKS4B    | 2.6442458  | -2.9745 | 0.669602 | 0.0159937 | ankyrin repeat and sterile alpha motif domain containing 4B                    |
| 73  | 7938951 ANOS      | -2.3424692 | -3.4238 | -1.12212 | 0.0301927 | anoctamin 5                                                                    |
| 74  | 8049799 ANO7      | 2.1350723  | -3.7184 | 0.452277 | 0.0459895 | anoctamin 7                                                                    |
| 75  | 7905283 ANXA9     | -2.4597308 | -3.2517 | -2.26573 | 0.0236572 | annexin A9                                                                     |
| 76  | 8034084 AP1M2     | -2.7490871 | -2.814  | -2.50749 | 0.0127571 | adaptor related protein complex 1 mu 2 subunit                                 |
| 77  | 8161618 APBA1     | 3.5176519  | -1.6019 | 0.960177 | 0.0023002 | amyloid beta precursor protein binding family A member 1                       |
| 78  | 8099982 APBB2     | -2.5988325 | -3.0434 | -0.94924 | 0.0176255 | amyloid beta precursor protein binding family B member 2                       |
| 79  | 7897632 APITD1-CC | -2.8836635 | -2.6055 | -1.1645  | 0.0095113 | APITD1-CORT readthrough///apoptosis-inducing, TAF9-like domain                 |
| 80  | 7966003 APPL2     | -2.2425228 | -3.5674 | -0.50044 | 0.037047  | adaptor protein, phosphotyrosine interacting with PH domain and le             |
| 81  | 7942774 AQP11     | -2.122294  | -3.7362 | -1.1444  | 0.0471746 | aquaporin 11                                                                   |
| 82  | 7987325 AQR       | -2.9339698 | -2.527  | -0.54104 | 0.0085152 | aquarius intron-binding spliceosomal factor                                    |
| 83  | 8167998 AR        | -2.5116395 | -3.1745 | -1.98042 | 0.0212091 | androgen receptor                                                              |
| 84  | 8133021 ARAFP2    | 2.3752435  | -3.376  | 0.446955 | 0.0282144 | ARAF pseudogene 2                                                              |
| 85  | 8139804 ARAFP2    | 2.3752435  | -3.376  | 0.446955 | 0.0282144 | ARAF pseudogene 2                                                              |
| 86  | 7962904 ARF3      | -2.5975476 | -3.0453 | -0.51749 | 0.0176738 | ADP ribosylation factor 3                                                      |
| 87  | 8088339 ARF4      | -2.4728572 | -3.2323 | -0.54835 | 0.0230142 | ADP ribosylation factor 4                                                      |
| 88  | 8122279 ARFGF3    | -5.8304428 | 1.8217  | -1.93978 | 0.0000129 | ARFGF family member 3                                                          |
| 89  | 8097813 ARFIP1    | -3.1000184 | -2.2658 | -0.62602 | 0.0058929 | ADP ribosylation factor interacting protein 1                                  |
| 90  | 7946201 ARFIP2    | -2.5586605 | -3.104  | -0.67522 | 0.019199  | ADP ribosylation factor interacting protein 2                                  |
| 91  | 8045563 ARHGAP15  | 2.1832787  | -3.6511 | 1.17502  | 0.0417584 | Rho GTPase activating protein 15                                               |
| 92  | 7921752 ARHGAP30  | 2.3182758  | -3.4588 | 0.788445 | 0.0317349 | Rho GTPase activating protein 30                                               |
| 93  | 8081838 ARHGAP31  | 2.2641881  | -3.5365 | 0.731037 | 0.0354496 | Rho GTPase activating protein 31                                               |
| 94  | 7952641 ARHGAP32  | -2.209819  | -3.6138 | -0.69274 | 0.0395838 | Rho GTPase activating protein 32                                               |
| 95  | 8062532 ARHGAP40  | -2.5174616 | -3.1658 | -2.15779 | 0.0209499 | Rho GTPase activating protein 40                                               |
| 96  | 7964436 ARHGAP9   | 2.4224611  | -3.3068 | 0.90279  | 0.0255754 | Rho GTPase activating protein 9                                                |
| 97  | 7944560 ARHGEF12  | -2.2883407 | -3.5019 | -0.53691 | 0.0337438 | Rho guanine nucleotide exchange factor 12                                      |
| 98  | 7897154 ARHGEF16  | -3.3584979 | -1.8555 | -0.9732  | 0.0032985 | Rho guanine nucleotide exchange factor 16                                      |
| 99  | 8106210 ARHGEF28  | -2.3961807 | -3.3454 | -0.87502 | 0.0270144 | Rho guanine nucleotide exchange factor 28                                      |
| 100 | 8096682 ARHGEF38  | -2.7721862 | -2.7784 | -2.81453 | 0.0121333 | Rho guanine nucleotide exchange factor 38                                      |
| 101 | 8168781 ARL13A    | 2.2024182  | -3.6242 | 0.701607 | 0.0401795 | ADP ribosylation factor like GTPase 13A                                        |
| 102 | 7995193 ARMC5     | 2.302131   | -3.4821 | 0.454134 | 0.0328042 | armadillo repeat containing 5                                                  |
| 103 | 8122818 ARMT1     | -3.1253059 | -2.2258 | -1.72407 | 0.0055696 | acidic residue methyltransferase 1                                             |
| 104 | 7988963 ARPP19    | -2.6176075 | -3.015  | -0.48835 | 0.0169326 | cAMP regulated phosphoprotein 19                                               |
| 105 | 7910494 ARV1///AR | -2.1460972 | -3.7031 | -0.63449 | 0.0449888 | ARV1 homolog, fatty acid homeostasis modulator///ARV1 homolog,                 |
| 106 | 7933341 ASAH2B/// | -2.7287155 | -2.8454 | -0.73624 | 0.0133326 | N-acylsphingosine amidohydrolase 2B///N-acylsphingosine amidohy                |
| 107 | 7933597 ASAH2B/// | -2.6877952 | -2.9081 | -0.73703 | 0.0145643 | N-acylsphingosine amidohydrolase 2B///N-acylsphingosine amidohy                |
| 108 | 7927599 ASAH2B/// | -2.5887009 | -3.0587 | -0.67476 | 0.0180104 | N-acylsphingosine amidohydrolase 2B///N-acylsphingosine amidohy                |
| 109 | 8026024 ASNA1     | -2.6952897 | -2.8966 | -0.57937 | 0.0143309 | arsA arsenite transporter, ATP-binding, homolog 1 (bacterial)                  |
| 110 | 8090664 ASTE1     | -2.5356473 | -3.1386 | -1.01035 | 0.0201593 | asteroid homolog 1 (Drosophila)                                                |
| 111 | 7955425 ATF1      | -2.287929  | -3.5025 | -0.56576 | 0.0337723 | activating transcription factor 1                                              |
| 112 | 8049271 ATG16L1   | -2.3661643 | -3.3893 | -0.54874 | 0.02875   | autophagy related 16 like 1                                                    |
| 113 | 8048120 ATIC      | -2.5196916 | -3.1624 | -0.6127  | 0.0208514 | 5-aminoimidazole-4-carboxamide ribonucleotide formyltransferase/II             |
| 114 | 7986789 ATP10A    | -2.1692    | -3.6709 | -0.85022 | 0.0429558 | ATPase phospholipid transporting 10A (putative)                                |
| 115 | 7907160 ATP1B1    | -2.4717828 | -3.2338 | -0.93742 | 0.0230662 | ATPase Na <sup>+</sup> /K <sup>+</sup> transporting subunit beta 1             |
| 116 | 7997593 ATP2C2    | -4.0240968 | -0.7994 | -1.66455 | 0.0007247 | ATPase secretory pathway Ca <sup>2+</sup> transporting 2                       |
| 117 | 7963713 ATP5G2    | -2.3507804 | -3.4117 | -0.35939 | 0.0296792 | ATP synthase, H <sup>+</sup> transporting, mitochondrial Fo complex subunit C; |
| 118 | 8037037 ATP5SL    | -2.5314968 | -3.1448 | -0.56814 | 0.0203372 | ATP5S like                                                                     |
| 119 | 8143221 ATP6VOA4  | 2.3247245  | -3.4495 | 2.171831 | 0.0313168 | ATPase H <sup>+</sup> transporting V0 subunit a4                               |
| 120 | 8074251 ATP6V1E1  | -2.1112179 | -3.7515 | -0.39749 | 0.0482243 | ATPase H <sup>+</sup> transporting V1 subunit E1                               |
| 121 | 7971731 ATP7B     | -4.1762064 | -0.5616 | -1.47318 | 0.000512  | ATPase copper transporting beta                                                |
| 122 | 8100026 ATP8A1    | 2.8898665  | -2.5959 | 1.154224 | 0.0093827 | ATPase phospholipid transporting 8A1                                           |
| 123 | 8023497 ATP8B1    | -2.6715703 | -2.9329 | -1.08277 | 0.015082  | ATPase phospholipid transporting 8B1                                           |
| 124 | 8142096 ATXN7L1   | 2.60747    | -3.0303 | 0.58551  | 0.0173034 | ataxin 7 like 1                                                                |
| 125 | 8142098 ATXN7L1   | 2.216131   | -3.6049 | 0.622058 | 0.0390821 | ataxin 7 like 1                                                                |
| 126 | 7964575 AVIL      | -3.2288622 | -2.0617 | -1.06946 | 0.0044169 | advillin                                                                       |
| 127 | 8132188 AVL9      | -2.7640632 | -2.791  | -0.55734 | 0.0123492 | AVL9 cell migration associated                                                 |
| 128 | 7907719 AXDND1    | -2.6323269 | -2.9926 | -1.8063  | 0.0164075 | axonemal dynein light chain domain containing 1                                |
| 129 | 8141374 AZGP1     | -2.9005357 | -2.5792 | -2.34764 | 0.0091653 | alpha-2-glycoprotein 1, zinc-binding                                           |
| 130 | 8091780 B3GALNT1  | -2.0971333 | -3.7709 | -0.79006 | 0.0495896 | beta-1,3-N-acetylgalactosaminyltransferase 1 (globoside blood group)           |
| 131 | 7968370 B3GLCT    | -2.483989  | -3.2157 | -0.6221  | 0.0224819 | beta 3-glucosyltransferase                                                     |
| 132 | 8084206 B3GNT5    | 2.8862183  | -2.6016 | 1.482984 | 0.0094581 | UDP-GlcNAc:betaGal beta-1,3-N-acetylglucosaminyltransferase 5                  |
| 133 | 8049075 B3GNT7    | 2.2616669  | -3.5401 | 0.658002 | 0.0356322 | UDP-GlcNAc:betaGal beta-1,3-N-acetylglucosaminyltransferase 7                  |
| 134 | 8128247 BACH2     | 2.4179987  | -3.3133 | 1.715049 | 0.0258146 | BTB domain and CNC homolog 2                                                   |
| 135 | 8096617 BANK1     | 3.0924167  | -2.2778 | 2.123757 | 0.0059936 | B-cell scaffold protein with ankyrin repeats 1                                 |
| 136 | 7964203 BAZ2A     | -2.4151626 | -3.3175 | -0.46541 | 0.0259677 | bromodomain adjacent to zinc finger domain 2A                                  |
| 137 | 7975676 BBOF1     | -3.0419877 | -2.3574 | -0.98223 | 0.0067051 | basal body orientation factor 1                                                |
| 138 | 8097252 BBS12     | -2.2384355 | -3.5732 | -0.53517 | 0.0373557 | Bardet-Biedl syndrome 12                                                       |
| 139 | 7984686 BBS4      | -2.7774875 | -2.7703 | -0.71116 | 0.0119943 | Bardet-Biedl syndrome 4                                                        |
| 140 | 8046147 BBS5      | -2.6165273 | -3.0166 | -0.73107 | 0.0169717 | Bardet-Biedl syndrome 5                                                        |
| 141 | 8135422 BCAP29    | -2.130656  | -3.7246 | -0.69208 | 0.046396  | B-cell receptor-associated protein 29                                          |
| 142 | 8063417 BCAS4     | -2.3252676 | -3.4487 | -1.00813 | 0.0312819 | breast carcinoma amplified sequence 4                                          |
| 143 | 7963139 BCDIN3D   | -2.1666876 | -3.6744 | -0.57105 | 0.0431728 | BCDIN3 domain containing RNA methyltransferase                                 |
| 144 | 7917338 BCL10     | -2.1523453 | -3.6944 | -0.39604 | 0.0444305 | B-cell CLL/lymphoma 10                                                         |

|     |                    |            |         |           |                                                                              |
|-----|--------------------|------------|---------|-----------|------------------------------------------------------------------------------|
| 145 | 8052399 BCL11A     | 3.3687551  | -1.8392 | 2.315409  | 0.003223 B-cell CLL/lymphoma 11A                                             |
| 146 | 7981242 BCL11B     | 2.346752   | -3.4175 | 1.005218  | 0.0299271 B-cell CLL/lymphoma 11B                                            |
| 147 | 7996281 BEAN1      | 2.129717   | -3.7259 | 0.412036  | 0.0464828 brain expressed, associated with NEDD4, 1                          |
| 148 | 8015715 BECN1      | -3.0760505 | -2.3036 | -0.56573  | 0.0062161 beclin 1                                                           |
| 149 | 8169009 BEX4       | -2.579441  | -3.0727 | -0.73996  | 0.0183692 brain expressed X-linked 4                                         |
| 150 | 7961891 BHLHE41    | 2.1800437  | -3.6557 | 1.105775  | 0.0420309 basic helix-loop-helix family member e41                           |
| 151 | 7954717 BICD1      | 2.0996645  | -3.7674 | 0.480853  | 0.0493417 BICD cargo adaptor 1                                               |
| 152 | 8054945 BIN1       | 2.1067736  | -3.7576 | 0.861427  | 0.0486514 bridging integrator 1                                              |
| 153 | 8144625 BLK        | 2.2102155  | -3.6132 | 3.556865  | 0.0395521 BLK proto-oncogene, Src family tyrosine kinase                     |
| 154 | 7956013 BLOC1S1-F  | -2.1246406 | -3.7329 | -0.52946  | 0.0469549 BLOC1S1-RDH5 readthrough///biogenesis of lysosomal organelles c    |
| 155 | 8132515 BLVRA      | -3.3796469 | -1.8218 | -1.17509  | 0.0031446 biliverdin reductase A                                             |
| 156 | 8036913 BLVRB      | -2.15358   | -3.6927 | -0.68344  | 0.0443209 biliverdin reductase B                                             |
| 157 | 7987454 BMF        | 4.159089   | -0.5883 | 0.873347  | 0.0005324 Bcl2 modifying factor                                              |
| 158 | 7979241 BMP4       | -3.589626  | -1.4873 | -0.94318  | 0.001953 bone morphogenetic protein 4                                        |
| 159 | 8180361 BMP8B      | 2.2814012  | -3.5119 | 0.557538  | 0.034226 bone morphogenetic protein 8b                                       |
| 160 | 7989323 BNIP2      | -2.2313641 | -3.5833 | -0.38751  | 0.0378953 BCL2 interacting protein 2                                         |
| 161 | 8145454 BNIP3L     | -2.231308  | -3.5833 | -0.52549  | 0.0378996 BCL2 interacting protein 3 like                                    |
| 162 | 8081686 BOC        | 2.1470123  | -3.7018 | 1.328845  | 0.0449066 BOC cell adhesion associated, oncogene regulated                   |
| 163 | 8062444 BPI        | 3.0232413  | -2.3869 | 1.925202  | 0.00699 bactericidal/permeability-increasing protein                         |
| 164 | 8061883 BPIFA1     | 2.275391   | -3.5205 | 0.879779  | 0.0346488 BPI fold containing family A member 1                              |
| 165 | 8075600 BPIFC      | 2.4728332  | -3.2323 | 0.83537   | 0.0230154 BPI fold containing family C                                       |
| 166 | 8134454 BRI3       | 2.192329   | -3.6384 | 0.445816  | 0.0410049 brain protein I3                                                   |
| 167 | 8085287 BRK1       | 2.4545532  | -3.2594 | 0.73589   | 0.0239153 BRICK1, SCAR/WAVE actin nucleating complex subunit                 |
| 168 | 7909931 BROX       | -2.4224167 | -3.3068 | -0.50436  | 0.0255778 BRO1 domain and CAAX motif containing                              |
| 169 | 8077595 BRPF1      | 2.1987323  | -3.6294 | 0.447163  | 0.0404793 bromodomain and PHD finger containing 1                            |
| 170 | 7902965 BTBD8      | -2.3012339 | -3.4834 | -0.8148   | 0.0328646 BTB domain containing 8                                            |
| 171 | 7951604 BTG4       | 2.1047836  | -3.7603 | 0.874941  | 0.0488437 BTG anti-proliferation factor 4                                    |
| 172 | 8089519 BTLA       | 3.7313302  | -1.2619 | 1.605129  | 0.0014142 B and T lymphocyte associated                                      |
| 173 | 8047339 BZW1       | -2.5601838 | -3.1017 | -0.60484  | 0.019137 basic leucine zipper and W2 domains 1                               |
| 174 | 7934185 C10orf54   | 2.4082886  | -3.3276 | 0.684499  | 0.0263423 chromosome 10 open reading frame 54                                |
| 175 | 7955777 C12orf10   | -2.5779019 | -3.075  | -0.49146  | 0.0184295 chromosome 12 open reading frame 10                                |
| 176 | 7957467 C12orf29   | -2.9961127 | -2.4295 | -0.6513   | 0.0074231 chromosome 12 open reading frame 29                                |
| 177 | 7977331 C14orf79   | -3.2615506 | -2.0097 | -1.05247  | 0.0041041 chromosome 14 open reading frame 79                                |
| 178 | 7977868 C14orf93   | -2.4276441 | -3.2991 | -0.58529  | 0.0253002 chromosome 14 open reading frame 93                                |
| 179 | 7986239 C15orf32   | -3.4526158 | -1.7056 | -0.79461  | 0.0026659 chromosome 15 open reading frame 32                                |
| 180 | 7991357 C15orf38-1 | -2.3571931 | -3.4023 | -0.43489  | 0.0292885 C15orf38-AP3S2 readthrough///adaptor related protein complex 3 si  |
| 181 | 7991367 C15orf38-2 | -2.9189107 | -2.5505 | -0.171363 | 0.0088023 C15orf38-AP3S2 readthrough///actin-related protein 2/3 complex inl |
| 182 | 7982593 C15orf54   | -2.2710048 | -3.5268 | -1.00345  | 0.0349603 chromosome 15 open reading frame 54                                |
| 183 | 8002992 C16orf46   | -2.163512  | -3.6788 | -0.78903  | 0.0434484 chromosome 16 open reading frame 46                                |
| 184 | 8000702 C16orf54   | 2.2760381  | -3.5196 | 1.242003  | 0.034603 chromosome 16 open reading frame 54                                 |
| 185 | 8003601 C16orf54   | 2.2760381  | -3.5196 | 1.242003  | 0.034603 chromosome 16 open reading frame 54                                 |
| 186 | 8001048 C16orf58   | -2.1273527 | -3.7291 | -0.52778  | 0.0467022 chromosome 16 open reading frame 58                                |
| 187 | 7923974 C1orf132// | -2.2861028 | -3.5051 | -0.8137   | 0.0338987 chromosome 1 open reading frame 132///microRNA 29c                 |
| 188 | 7897753 C1orf167   | 3.6625666  | -1.3712 | 0.501728  | 0.0016542 chromosome 1 open reading frame 167                                |
| 189 | 7905324 C1orf56    | -3.1962742 | -2.1134 | -1.04638  | 0.004752 chromosome 1 open reading frame 56                                  |
| 190 | 8111443 C1QTNF3-   | -2.1040527 | -3.7613 | -1.19245  | 0.0489145 C1QTNF3-AMACR readthrough (NMD candidate)///C1q and tumor r        |
| 191 | 8065244 C20orf78   | 2.2749264  | -3.5212 | 0.568775  | 0.0346817 chromosome 20 open reading frame 78                                |
| 192 | 8071745 C22orf15   | 2.613113   | -3.0218 | 0.671847  | 0.0170961 chromosome 22 open reading frame 15                                |
| 193 | 8080847 C3orf14    | -5.4828542 | 1.3577  | -2.14349  | 0.0000273 chromosome 3 open reading frame 14                                 |
| 194 | 8081645 C3orf52    | -4.3173017 | -0.3431 | -1.54682  | 0.0003711 chromosome 3 open reading frame 52                                 |
| 195 | 8083223 C3orf58    | 2.5652537  | -3.0941 | 0.922127  | 0.018932 chromosome 3 open reading frame 58                                  |
| 196 | 8097435 C4orf33    | -2.1856762 | -3.6478 | -0.67599  | 0.0415576 chromosome 4 open reading frame 33                                 |
| 197 | 8107194 C5orf30    | -2.3469268 | -3.4173 | -0.81801  | 0.0299163 chromosome 5 open reading frame 30                                 |
| 198 | 8110518 C5orf60    | -2.5178346 | -3.1652 | -0.53497  | 0.0209334 chromosome 5 open reading frame 60                                 |
| 199 | 8108192 C5orf66    | 2.2388084  | -3.5727 | 0.480244  | 0.0373274 chromosome 5 open reading frame 66                                 |
| 200 | 8123463 C6orf120   | -2.3255069 | -3.4483 | -0.44852  | 0.0312665 chromosome 6 open reading frame 120                                |
| 201 | 8126446 C6orf226   | 2.1771711  | -3.6597 | 0.48703   | 0.0422741 chromosome 6 open reading frame 226                                |
| 202 | 8139228 C7orf25    | -2.2612493 | -3.5407 | -0.50787  | 0.0356625 chromosome 7 open reading frame 25                                 |
| 203 | 8136535 C7orf55-LL | 2.1247307  | -3.7328 | 0.340903  | 0.0469465 C7orf55-LUC7L2 readthrough///formation of mitochondrial complex    |
| 204 | 8158539 C9orf106   | -3.6118747 | -1.4518 | -1.88113  | 0.0018566 chromosome 9 open reading frame 106                                |
| 205 | 8163181 C9orf152   | -2.6335623 | -2.9908 | -2.46422  | 0.0163641 chromosome 9 open reading frame 152                                |
| 206 | 8162039 C9orf64    | -2.6705258 | -2.9345 | -0.80055  | 0.0151159 chromosome 9 open reading frame 64                                 |
| 207 | 8163348 C9orf84    | -2.3238263 | -3.4508 | -1.35552  | 0.0313748 chromosome 9 open reading frame 84                                 |
| 208 | 7989501 CA12       | -2.8647268 | -2.635  | -2.29305  | 0.0099146 carbonic anhydrase 12                                              |
| 209 | 8150978 CA8        | -4.2172153 | -0.4979 | -2.25529  | 0.0004663 carbonic anhydrase 8                                               |
| 210 | 7949843 CABP2      | 3.040699   | -2.3594 | 0.654007  | 0.0067243 calcium binding protein 2                                          |
| 211 | 8034643 CACNA1A    | 2.5035249  | -3.1866 | 0.488816  | 0.0215754 calcium voltage-gated channel subunit alpha1 A                     |
| 212 | 8172580 CACNA1F    | -2.9737958 | -2.4646 | -4.70958  | 0.0077987 calcium voltage-gated channel subunit alpha1 F                     |
| 213 | 8008409 CACNA1G    | 2.2414888  | -3.5689 | 0.445551  | 0.0371248 calcium voltage-gated channel subunit alpha1 G                     |
| 214 | 8073152 CACNA1I    | 2.4488291  | -3.2679 | 0.386338  | 0.0242039 calcium voltage-gated channel subunit alpha1 I                     |
| 215 | 8009334 CACNG4     | -3.4265151 | -1.7471 | -1.98694  | 0.0028282 calcium voltage-gated channel auxiliary subunit gamma 4            |
| 216 | 8081036 CADM2      | -2.7114498 | -2.8719 | -2.08981  | 0.0138397 cell adhesion molecule 2                                           |
| 217 | 8142585 CADPS2     | -2.1231377 | -3.735  | -1.03402  | 0.0470955 calcium dependent secretion activator 2                            |

|     |         |          |            |         |          |           |                                                            |
|-----|---------|----------|------------|---------|----------|-----------|------------------------------------------------------------|
| 218 | 8092468 | CAMK2N2  | 2.3680204  | -3.3866 | 0.418915 | 0.0286397 | calcium/calmodulin dependent protein kinase II inhibitor 2 |
| 219 | 8107307 | CAMK4    | 2.5427472  | -3.1279 | 1.278866 | 0.0198583 | calcium/calmodulin dependent protein kinase IV             |
| 220 | 8117054 | CAP2     | -3.0602928 | -2.3285 | -1.57832 | 0.0064378 | CAP, adenylate cyclase-associated protein, 2 (yeast)       |
| 221 | 8051275 | CAPN13   | -2.1151138 | -3.7461 | -2.02412 | 0.0478527 | calpain 13                                                 |
| 222 | 8174527 | CAPN6    | 2.9751502  | -2.4625 | 1.801111 | 0.0077754 | calpain 6                                                  |
| 223 | 7910466 | CAPN9    | -2.6579297 | -2.9537 | -2.36086 | 0.0155308 | calpain 9                                                  |
| 224 | 8028172 | CAPNS1   | -2.1602185 | -3.6834 | -0.33898 | 0.043736  | calpain small subunit 1                                    |
| 225 | 7962112 | CAPRN2   | 3.0145066  | -2.4006 | 0.726327 | 0.0071267 | caprin family member 2                                     |
| 226 | 8156404 | CARD19   | -2.8292648 | -2.6901 | -0.78938 | 0.0107144 | caspase recruitment domain family member 19                |
| 227 | 7996608 | CARMIL2  | 3.4211668  | -1.7557 | 1.121882 | 0.0028627 | capping protein regulator and myosin 1 linker 2            |
| 228 | 7961844 | CASC1    | -3.3320147 | -1.8977 | -2.17681 | 0.0035017 | cancer susceptibility candidate 1                          |
| 229 | 7912646 | CASP9    | -2.7657223 | -2.7884 | -0.51802 | 0.0123048 | caspase 9                                                  |
| 230 | 8063497 | CASS4    | 3.2567309  | -2.0174 | 0.662415 | 0.0041488 | Cas scaffolding protein family member 4                    |
| 231 | 7912347 | CASZ1    | -3.3014862 | -1.9462 | -0.95049 | 0.0037513 | castor zinc finger 1                                       |
| 232 | 7912343 | CASZ1    | -3.1146774 | -2.2426 | -0.87258 | 0.0057033 | castor zinc finger 1                                       |
| 233 | 7912316 | CASZ1    | -3.0475498 | -2.3486 | -0.89103 | 0.0066228 | castor zinc finger 1                                       |
| 234 | 8108182 | CATSPER3 | -2.307099  | -3.4749 | -2.37496 | 0.0324717 | cation channel sperm associated 3                          |
| 235 | 8003425 | CBFA2T3  | 2.7519919  | -2.8096 | 0.565384 | 0.012677  | CBFA2/RUNX1 translocation partner 3                        |
| 236 | 8113602 | CCDC112  | -2.1122585 | -3.75   | -0.52042 | 0.0481248 | coiled-coil domain containing 112                          |
| 237 | 8131871 | CCDC126  | -3.2295884 | -2.0605 | -0.90029 | 0.0044098 | coiled-coil domain containing 126                          |
| 238 | 8057377 | CCDC141  | 2.2768915  | -3.5183 | 1.735544 | 0.0345428 | coiled-coil domain containing 141                          |
| 239 | 8133770 | CCDC146  | -2.8964212 | -2.5856 | -0.85573 | 0.0092486 | coiled-coil domain containing 146                          |
| 240 | 7944913 | CCDC15   | -2.3997939 | -3.3401 | -2.8842  | 0.0268122 | coiled-coil domain containing 15                           |
| 241 | 8025868 | CCDC159  | -2.4674254 | -3.2403 | -0.68359 | 0.0232783 | coiled-coil domain containing 159                          |
| 242 | 8022831 | CCDC178  | 2.1251071  | -3.7323 | 0.807372 | 0.0469114 | coiled-coil domain containing 178                          |
| 243 | 8000932 | CCDC189  | -2.4572793 | -3.2554 | -1.1666  | 0.0237791 | coiled-coil domain containing 189                          |
| 244 | 8089659 | CCDC191  | -2.9568116 | -2.4912 | -0.84534 | 0.0080968 | coiled-coil domain containing 191                          |
| 245 | 8089988 | CCDC58   | -2.2810736 | -3.5123 | -0.42786 | 0.034249  | coiled-coil domain containing 58                           |
| 246 | 8115261 | CCDC69   | 2.468435   | -3.2388 | 1.027488 | 0.023229  | coiled-coil domain containing 69                           |
| 247 | 8087372 | CCDC71   | -2.1512745 | -3.6959 | -1.18463 | 0.0445257 | coiled-coil domain containing 71                           |
| 248 | 8052269 | CCDC88A  | 3.6202628  | -3.0109 | 0.808839 | 0.0168367 | coiled-coil domain containing 88A                          |
| 249 | 7950804 | CCDC89   | -2.1109698 | -3.7518 | -1.06029 | 0.048248  | coiled-coil domain containing 89                           |
| 250 | 8099746 | CKKAR    | 2.2796267  | -3.5144 | 0.770279 | 0.0343503 | cholecystokinin A receptor                                 |
| 251 | 8160879 | CCL19    | 2.6977435  | -2.8929 | 2.467384 | 0.0142552 | C-C motif chemokine ligand 19                              |
| 252 | 7942123 | CCND1    | -2.4877958 | -3.21   | -1.68265 | 0.0223025 | cyclin D1                                                  |
| 253 | 8112072 | CCNO     | -2.720682  | -2.8577 | -1.12086 | 0.0135663 | cyclin O                                                   |
| 254 | 7993664 | CCP110   | -3.0330919 | -2.3714 | -1.08623 | 0.0068389 | centriolar coiled-coil protein 110                         |
| 255 | 8093294 | CCR2     | 3.1412182  | -2.2006 | 1.708961 | 0.0053752 | C-C motif chemokine receptor 2                             |
| 256 | 8079392 | CCR2     | 2.5912757  | -3.0548 | 1.301647 | 0.0179118 | C-C motif chemokine receptor 2                             |
| 257 | 8078442 | CCR4     | 2.4630387  | -3.2468 | 1.568663 | 0.0234936 | C-C motif chemokine receptor 4                             |
| 258 | 8015031 | CCR7     | 3.2082266  | -2.0944 | 1.980432 | 0.0046263 | C-C motif chemokine receptor 7                             |
| 259 | 8112428 | CD180    | 2.8096505  | -2.7205 | 1.182424 | 0.011183  | CD180 molecule                                             |
| 260 | 7994487 | CD19     | 3.2657838  | -2.003  | 1.739821 | 0.0040652 | CD19 molecule                                              |
| 261 | 8052916 | CD207    | 2.1147949  | -3.7465 | 1.110956 | 0.047883  | CD207 molecule                                             |
| 262 | 8027837 | CD22     | 3.023703   | -2.3862 | 1.687428 | 0.0069828 | CD22 molecule                                              |
| 263 | 7922040 | CD247    | 3.0198175  | -2.3923 | 0.868803 | 0.0070433 | CD247 molecule                                             |
| 264 | 7949588 | CD248    | 2.1158772  | -3.745  | 0.831893 | 0.0477802 | CD248 molecule                                             |
| 265 | 7953333 | CD27     | 3.1742836  | -2.1483 | 1.630278 | 0.0049919 | CD27 molecule                                              |
| 266 | 8030277 | CD37     | 2.4066283  | -3.3301 | 1.06591  | 0.0264335 | CD37 molecule                                              |
| 267 | 8094240 | CD38     | 2.1158988  | -3.745  | 1.503515 | 0.0477781 | CD38 molecule                                              |
| 268 | 7952056 | CD3D     | 2.1033552  | -3.7623 | 1.129435 | 0.0489822 | CD3d molecule                                              |
| 269 | 7944179 | CD3E     | 2.6351339  | -2.9884 | 1.528112 | 0.0163091 | CD3e molecule                                              |
| 270 | 7909400 | CD46     | -2.6023028 | -3.0382 | -0.61779 | 0.0174954 | CD46 molecule                                              |
| 271 | 7940409 | CD5      | 2.6743346  | -2.9287 | 1.580355 | 0.0149926 | CD5 molecule                                               |
| 272 | 7899160 | CD52     | 2.5551882  | -3.1092 | 1.184367 | 0.0193411 | CD52 molecule                                              |
| 273 | 8019478 | CD7      | 2.909568   | -2.5651 | 0.702166 | 0.0089851 | CD7 molecule                                               |
| 274 | 8161004 | CD72     | 2.2152808  | -3.6061 | 0.615073 | 0.0391493 | CD72 molecule                                              |
| 275 | 8029136 | CD79A    | 3.3924976  | -1.8013 | 2.358974 | 0.0030546 | CD79a molecule                                             |
| 276 | 8017511 | CD79B    | 2.7114446  | -2.8719 | 1.349591 | 0.0138398 | CD79b molecule                                             |
| 277 | 8081564 | CD96     | 2.4390419  | -3.2823 | 1.284835 | 0.0247047 | CD96 molecule                                              |
| 278 | 8112053 | CDC20B   | -2.7253961 | -2.8505 | -3.41276 | 0.0134287 | cell division cycle 20B                                    |
| 279 | 7924773 | CDC42BPA | -2.2571316 | -3.5466 | -0.77215 | 0.0359628 | CDC42 binding protein kinase alpha                         |
| 280 | 8046488 | CDCA7    | 2.2380438  | -3.5738 | 1.722164 | 0.0373854 | cell division cycle associated 7                           |
| 281 | 8023710 | CDH19    | 3.7233928  | -1.2745 | 3.639313 | 0.00144   | cadherin 19                                                |
| 282 | 8105862 | CDK7     | -2.9310147 | -2.5316 | -0.51463 | 0.0085708 | cyclin dependent kinase 7                                  |
| 283 | 8177462 | CDK7     | -2.9310147 | -2.5316 | -0.51463 | 0.0085708 | cyclin dependent kinase 7                                  |
| 284 | 8114171 | CDKL3    | -3.3035602 | -1.9429 | -0.82456 | 0.0037338 | cyclin dependent kinase like 3                             |
| 285 | 8034075 | CDKN2D   | 2.4687857  | -3.2383 | 0.447028 | 0.0232119 | cyclin dependent kinase inhibitor 2D                       |
| 286 | 8029086 | CEACAM5  | -2.5701895 | -3.0866 | -2.34645 | 0.0187344 | carcinoembryonic antigen related cell adhesion molecule 5  |
| 287 | 8029098 | CEACAM6  | -2.8648116 | -2.6349 | -3.63694 | 0.0099127 | carcinoembryonic antigen related cell adhesion molecule 6  |
| 288 | 7926127 | CELF2    | 2.1833261  | -3.6511 | 1.011728 | 0.0417545 | CUGBP, Elav-like family member 2                           |
| 289 | 8076757 | CELSR1   | -3.4021732 | -1.7859 | -1.5862  | 0.0029884 | cadherin EGF LAG seven-pass G-type receptor 1              |
| 290 | 8156341 | CENPP    | -2.1282604 | -3.7279 | -0.89205 | 0.0466179 | centromere protein P                                       |

|     |         |           |            |         |          |           |                                                                  |
|-----|---------|-----------|------------|---------|----------|-----------|------------------------------------------------------------------|
| 291 | 8013015 | CENPV     | 2.5655751  | -3.0936 | 1.51338  | 0.0189191 | centromere protein V                                             |
| 292 | 8167652 | CENPVL2// | 2.3916751  | -3.352  | 0.333941 | 0.0272685 | centromere protein V like 2///centromere protein V like 1        |
| 293 | 8172715 | CENPVL2// | 2.3916751  | -3.352  | 0.333941 | 0.0272685 | centromere protein V like 2///centromere protein V like 1        |
| 294 | 7911870 | CEP104    | -2.1136286 | -3.7481 | -0.41474 | 0.047994  | centrosomal protein 104                                          |
| 295 | 8082827 | CEP63     | -2.4208334 | -3.3092 | -0.52409 | 0.0256624 | centrosomal protein 63                                           |
| 296 | 8129193 | CEP85L    | 3.8556634  | -1.0648 | 1.330106 | 0.0010648 | centrosomal protein 85 like                                      |
| 297 | 7991546 | CERS3     | 2.4204709  | -3.3097 | 1.13253  | 0.0256818 | ceramide synthase 3                                              |
| 298 | 8046086 | CERS6     | -3.4955309 | -1.6372 | -1.15802 | 0.0024186 | ceramide synthase 6                                              |
| 299 | 7921862 | CFAP126   | -2.2347174 | -3.5785 | -1.43984 | 0.0376385 | cilia and flagella associated protein 126                        |
| 300 | 8158081 | CFAP157   | -2.3748979 | -3.3765 | -0.98483 | 0.0282346 | cilia and flagella associated protein 157                        |
| 301 | 7936201 | CFAP43    | -2.3914186 | -3.3524 | -1.56382 | 0.0272831 | cilia and flagella associated protein 43                         |
| 302 | 8089606 | CFAP44    | -2.5702847 | -3.0865 | -0.76047 | 0.0187306 | cilia and flagella associated protein 44                         |
| 303 | 8089596 | CFAP44    | -2.5509976 | -3.1155 | -0.83012 | 0.0195139 | cilia and flagella associated protein 44                         |
| 304 | 7900639 | CFAP57    | -2.1766012 | -3.6605 | -0.88655 | 0.0423225 | cilia and flagella associated protein 57                         |
| 305 | 7930320 | CFAP58    | 2.5090417  | -3.1784 | 0.662012 | 0.0213257 | cilia and flagella associated protein 58                         |
| 306 | 8134051 | CFAP69    | -2.9092464 | -2.5656 | -1.34455 | 0.0089915 | cilia and flagella associated protein 69                         |
| 307 | 7934334 | CFAP70    | -2.3449871 | -3.4201 | -1.12211 | 0.0300363 | cilia and flagella associated protein 70                         |
| 308 | 8179351 | CFB       | -2.8531712 | -2.653  | -1.93533 | 0.0101687 | complement factor B                                              |
| 309 | 8118345 | CFB       | -2.7887953 | -2.7528 | -1.85323 | 0.0117028 | complement factor B                                              |
| 310 | 8178115 | CFB       | -2.7887953 | -2.7528 | -1.85323 | 0.0117028 | complement factor B                                              |
| 311 | 8172333 | CFP       | 2.134694   | -3.719  | 0.59971  | 0.0460242 | complement factor properdin                                      |
| 312 | 7904883 | CHD1L     | 2.1000112  | -3.7669 | 0.623309 | 0.0493078 | chromodomain helicase DNA binding protein 1 like                 |
| 313 | 8146579 | CHD7      | 2.2782018  | -3.5165 | 0.765018 | 0.0344505 | chromodomain helicase DNA binding protein 7                      |
| 314 | 8039796 | CHMP2A    | -2.5182984 | -3.1645 | -0.71453 | 0.0209129 | charged multivesicular body protein 2A                           |
| 315 | 8081055 | CHMP2B    | -3.0669629 | -2.318  | -0.6904  | 0.006343  | charged multivesicular body protein 2B                           |
| 316 | 8154785 | CHMP5     | -3.0279193 | -2.3795 | -0.76787 | 0.0069178 | charged multivesicular body protein 5                            |
| 317 | 7950425 | CHRD2L    | 2.5350048  | -3.1395 | 0.75009  | 0.0201867 | chordin like 2                                                   |
| 318 | 7910915 | CHRM3     | 4.8279406  | 0.4273  | 2.190008 | 0.0001168 | cholinergic receptor muscarinic 3                                |
| 319 | 7945896 | CHRNA10   | -2.4934702 | -3.2016 | -0.56737 | 0.0220376 | cholinergic receptor nicotinic alpha 10 subunit                  |
| 320 | 7928291 | CHST3     | 3.1005766  | -2.2649 | 1.101982 | 0.0058856 | carbohydrate sulfotransferase 3                                  |
| 321 | 8002882 | CHST6     | 2.8017542  | -2.7328 | 0.581497 | 0.0113772 | carbohydrate sulfotransferase 6                                  |
| 322 | 7991386 | CIB1      | -2.886601  | -2.601  | -0.73936 | 0.0094502 | calcium and integrin binding 1                                   |
| 323 | 7993195 | CIITA     | 2.4551113  | -3.2586 | 0.97329  | 0.0238874 | class II major histocompatibility complex transactivator         |
| 324 | 8087739 | CISH      | -2.1801701 | -3.6555 | -0.75085 | 0.0420202 | cytokine inducible SH2 containing protein                        |
| 325 | 8167603 | CLCN5     | 2.7236092  | -2.8532 | 0.900432 | 0.0134807 | chloride voltage-gated channel 5                                 |
| 326 | 8134091 | CLDN12    | -2.350718  | -3.4118 | -0.68158 | 0.029683  | claudin 12                                                       |
| 327 | 7998898 | CLDN6     | 2.2058456  | -3.6194 | 1.031962 | 0.0399026 | claudin 6                                                        |
| 328 | 8012126 | CLDN7     | -2.842153  | -2.6701 | -1.36469 | 0.0104168 | claudin 7                                                        |
| 329 | 8012013 | CLEC10A   | 3.5515223  | -1.548  | 1.240996 | 0.0021298 | C-type lectin domain family 10 member A                          |
| 330 | 8026350 | CLEC17A   | 3.1969589  | -2.1123 | 0.93519  | 0.0047447 | C-type lectin domain family 17 member A                          |
| 331 | 7960832 | CLEC4C    | 3.3635106  | -1.8475 | 1.339774 | 0.0032614 | C-type lectin domain family 4 member C                           |
| 332 | 8102877 | CLGN      | -4.0079048 | -0.8248 | -2.6     | 0.000752  | calmegin                                                         |
| 333 | 8133459 | CLIP2     | 2.2593841  | -3.5434 | 0.708322 | 0.0357983 | CAP-Gly domain containing linker protein 2                       |
| 334 | 8099368 | CLNK      | 2.8567122  | -2.6475 | 0.73432  | 0.0100902 | cytokine dependent hematopoietic cell linker                     |
| 335 | 7992917 | CLUAP1    | -2.4274975 | -3.2994 | -0.95552 | 0.025308  | clusterin associated protein 1                                   |
| 336 | 8110971 | CMBL      | -2.5531589 | -3.1123 | -1.54696 | 0.0194246 | carboxymethylenebutenolidase homolog                             |
| 337 | 8078405 | CMTM7     | 2.3828839  | -3.3649 | 1.271156 | 0.0277708 | CKLF like MARVEL transmembrane domain containing 7               |
| 338 | 7929732 | CNNM1     | 2.3894409  | -3.3553 | 0.620228 | 0.0273954 | cyclin and CBS domain divalent metal cation transport mediator 1 |
| 339 | 7930194 | CNNM2     | 2.3045457  | -3.4786 | 0.796006 | 0.0326422 | cyclin and CBS domain divalent metal cation transport mediator 2 |
| 340 | 8110589 | CNOT6     | -2.9233968 | -2.5435 | -0.61518 | 0.0087158 | CCR4-NOT transcription complex subunit 6                         |
| 341 | 7911138 | CNST      | -2.1670633 | -3.6739 | -0.6728  | 0.0431403 | consortin, connexin sorting protein                              |
| 342 | 8036835 | CNTD2     | -2.3945686 | -3.3478 | -4.56602 | 0.0271051 | cyclin N-terminal domain containing 2                            |
| 343 | 8137010 | CNTNAP2   | -2.5830786 | -3.0672 | -1.31526 | 0.0182274 | contactin associated protein-like 2                              |
| 344 | 8139244 | COA1      | -2.616324  | -3.0169 | -0.49503 | 0.0169791 | cytochrome c oxidase assembly factor 1 homolog                   |
| 345 | 8007272 | COASY     | -2.7407089 | -2.8269 | -0.74874 | 0.0129909 | Coenzyme A synthase                                              |
| 346 | 8127446 | COL9A1    | 2.3439467  | -3.4216 | 1.148536 | 0.0301009 | collagen type IX alpha 1 chain                                   |
| 347 | 8063970 | COL9A3    | 2.9811848  | -2.453  | 0.651523 | 0.0076723 | collagen type IX alpha 3 chain                                   |
| 348 | 7988605 | COP2      | -2.1093618 | -3.754  | -0.37722 | 0.0484022 | COP9 signalosome subunit 2                                       |
| 349 | 7955896 | COPZ1     | -2.336905  | -3.4318 | -0.69296 | 0.0305411 | coatamer protein complex subunit zeta 1                          |
| 350 | 8047217 | COQ10B    | -2.9957305 | -2.4301 | -0.75746 | 0.0074293 | coenzyme Q10B                                                    |
| 351 | 7967072 | COQ5      | -2.1126712 | -3.7494 | -0.50935 | 0.0480854 | coenzyme Q5, methyltransferase                                   |
| 352 | 7993608 | COQ7      | -2.5830458 | -3.0673 | -1.03158 | 0.0182287 | coenzyme Q7, hydroxylase                                         |
| 353 | 7994769 | CORO1A    | 3.9037427  | -0.9888 | 1.502945 | 0.000954  | coronin 1A                                                       |
| 354 | 8162744 | CORO2A    | -2.261045  | -3.541  | -0.89004 | 0.0356774 | coronin 2A                                                       |
| 355 | 8003171 | COTL1     | 2.4051105  | -3.3323 | 0.795299 | 0.0265172 | coactosin like F-actin binding protein 1                         |
| 356 | 7911085 | COX2      | -2.8835487 | -2.6057 | -0.81091 | 0.0095137 | COX20, cytochrome c oxidase assembly factor                      |
| 357 | 8001041 | COX6A2    | 2.127747   | -3.7286 | 0.434237 | 0.0466655 | cytochrome c oxidase subunit 6A2                                 |
| 358 | 8136200 | CPA4      | 2.7094398  | -2.875  | 1.371097 | 0.0138999 | carboxypeptidase A4                                              |
| 359 | 8151191 | CPA6      | -3.264813  | -2.0046 | -2.14006 | 0.0040741 | carboxypeptidase A6                                              |
| 360 | 8035201 | CPAMD8    | 2.609781   | -3.0268 | 1.639459 | 0.0172182 | C3 and PZP like, alpha-2-macroglobulin domain containing 8       |
| 361 | 8083246 | CPB1      | -2.5252534 | -3.1541 | -3.6231  | 0.0206076 | carboxypeptidase B1                                              |
| 362 | 8098204 | CPE       | -2.2380461 | -3.5738 | -0.85367 | 0.0373852 | carboxypeptidase E                                               |
| 363 | 8090690 | CPNE4     | -2.5070252 | -3.1814 | -3.31595 | 0.0214167 | copine 4                                                         |

|     |                   |            |         |          |                                                                              |
|-----|-------------------|------------|---------|----------|------------------------------------------------------------------------------|
| 364 | 8126035 CPNE5     | 3.0993598  | -2.2668 | 0.708914 | 0.0059015 copine 5                                                           |
| 365 | 8018102 CPSF4L    | -2.2655626 | -3.5346 | -2.92451 | 0.0353505 cleavage and polyadenylation specific factor 4 like                |
| 366 | 8039937 CPTP      | -2.4253126 | -3.3026 | -0.58965 | 0.0254237 ceramide-1-phosphate transfer protein                              |
| 367 | 7909371 CR1       | 2.1388064  | -3.7133 | 1.187545 | 0.0456483 complement component 3b/4b receptor 1 (Knops blood group)          |
| 368 | 7909350 CR2       | 2.6326352  | -2.9922 | 5.90316  | 0.0163967 complement component 3d receptor 2                                 |
| 369 | 7985159 CRABP1    | 3.1236     | -2.2285 | 3.288241 | 0.0055909 cellular retinoic acid binding protein 1                           |
| 370 | 8143188 CREB3L2   | 2.1092475  | -3.7542 | 0.589447 | 0.0484132 cAMP responsive element binding protein 3 like 2                   |
| 371 | 7905677 CREB3L4   | -2.4147204 | -3.3182 | -1.77395 | 0.0259916 cAMP responsive element binding protein 3 like 4                   |
| 372 | 7977409 CRIP1     | -3.4979967 | -1.6332 | -2.06111 | 0.0024051 cysteine rich protein 1                                            |
| 373 | 7977397 CRIP2     | -2.2093212 | -3.6145 | -0.76727 | 0.0396236 cysteine rich protein 2                                            |
| 374 | 8146967 CRISPLD1  | 2.3829563  | -3.3648 | 1.45972  | 0.0277667 cysteine rich secretory protein LCCL domain containing 1           |
| 375 | 7966052 CRY1      | -2.5551866 | -3.1092 | -0.49587 | 0.0193412 cryptochrome circadian clock 1                                     |
| 376 | 8071997 CRYBB2    | 2.3646307  | -3.3915 | 0.351866 | 0.0288414 crystallin beta B2                                                 |
| 377 | 8071989 CRYBB3    | 2.3115867  | -3.4684 | 0.488005 | 0.0321739 crystallin beta B3                                                 |
| 378 | 7917037 CRYZ      | -2.5332207 | -3.1422 | -0.76657 | 0.0202631 crystallin zeta                                                    |
| 379 | 8107887 CSF2      | 2.446621   | -3.2711 | 0.559405 | 0.024316 colony stimulating factor 2                                         |
| 380 | 8165735 CSF2RA    | 2.1461034  | -3.7031 | 0.732097 | 0.0449882 colony stimulating factor 2 receptor alpha subunit                 |
| 381 | 8176306 CSF2RB    | 2.1461034  | -3.7031 | 0.732097 | 0.0449882 colony stimulating factor 2 receptor alpha subunit                 |
| 382 | 8072757 CSF2RB    | 2.6158598  | -3.0176 | 1.136986 | 0.016996 colony stimulating factor 2 receptor beta common subunit            |
| 383 | 8149574 CSGALNAC  | 2.2628945  | -3.5384 | 1.055698 | 0.0355432 chondroitin sulfate N-acetylgalactosaminyltransferase 1            |
| 384 | 8095441 CSN1S2AP  | -2.3310672 | -3.4403 | -2.54657 | 0.0309107 casein alpha s2-like A, pseudogene                                 |
| 385 | 8115022 CSNK1A1   | -2.6073033 | -3.0306 | -0.61821 | 0.0173096 casein kinase 1 alpha 1                                            |
| 386 | 7971071 CSNK1A1L  | 2.1916702  | -3.6394 | 0.353461 | 0.0410593 casein kinase 1 alpha 1 like                                       |
| 387 | 7963235 CSRNP2    | -2.5767792 | -3.0767 | -0.7263  | 0.0184736 cysteine and serine rich nuclear protein 2                         |
| 388 | 8065388 CST11     | -2.4114254 | -3.323  | -0.70391 | 0.0261707 cystatin 11                                                        |
| 389 | 8061416 CST7      | 2.9844666  | -2.4478 | 0.950361 | 0.0076169 cystatin F                                                         |
| 390 | 7969151 CTAGE10P  | -2.9153739 | -2.5561 | -0.87867 | 0.0088711 CTAGE family member 10, pseudogene                                 |
| 391 | 8093456 CTBP1-AS2 | -2.18183   | -3.6532 | -0.5902  | 0.0418802 CTBP1 antisense RNA 2 (head to head)                               |
| 392 | 7964579 CTDSP2    | -2.212762  | -3.6096 | -0.41042 | 0.0393491 CTD small phosphatase 2                                            |
| 393 | 7983335 CTDSP2    | -2.5272896 | -3.1511 | -0.32785 | 0.0205191 CTD small phosphatase like 2                                       |
| 394 | 8016878 CUEDC1    | -2.9874754 | -2.4431 | -0.8854  | 0.0075663 CUE domain containing 1                                            |
| 395 | 8059393 CUL3      | -2.2237954 | -3.594  | -0.40666 | 0.0384808 cullin 3                                                           |
| 396 | 8173493 CXCR3     | 2.1971629  | -3.6316 | 0.947484 | 0.0406075 C-X-C motif chemokine receptor 3                                   |
| 397 | 8055465 CXCR4     | 2.7198872  | -2.8589 | 0.948493 | 0.0135896 C-X-C motif chemokine receptor 4                                   |
| 398 | 8173437 CXorf65   | 3.405519   | -1.7806 | 1.395403 | 0.0029659 chromosome X open reading frame 65                                 |
| 399 | 7923516 CYB5R1/// | -2.2183597 | -3.6017 | -0.57663 | 0.0389064 cytochrome b5 reductase 1///cytochrome b5 reductase 1              |
| 400 | 8051583 CYP1B1    | 2.7823921  | -2.7627 | 1.127121 | 0.011867 cytochrome P450 family 1 subfamily B member 1                       |
| 401 | 7935169 CYP2C8    | -2.2796874 | -3.5143 | -2.81092 | 0.0343461 cytochrome P450 family 2 subfamily C member 8                      |
| 402 | 8028991 CYP2S1    | 2.2271918  | -3.5892 | 0.575151 | 0.038217 cytochrome P450 family 2 subfamily S member 1                       |
| 403 | 8035095 CYP4F11   | -2.9287027 | -2.5352 | -2.17238 | 0.0086146 cytochrome P450 family 4 subfamily F member 11                     |
| 404 | 8018922 CYTH1     | 2.4806915  | -3.2206 | 0.518706 | 0.0226384 cytohesin 1                                                        |
| 405 | 8055980 CYTIP     | 2.6692768  | -2.9364 | 1.230021 | 0.0151566 cytohesin 1 interacting protein                                    |
| 406 | 8099132 CYTL1     | 3.4356089  | -1.7327 | 0.629637 | 0.0027706 cytokine like 1                                                    |
| 407 | 7977775 DAD1      | -2.1656606 | -3.6758 | -0.38251 | 0.0432618 defender against cell death 1                                      |
| 408 | 7969959 DAOA      | 2.1084133  | -3.7553 | 0.400013 | 0.0484934 D-amino acid oxidase activator                                     |
| 409 | 8156199 DAPK1     | 2.6846254  | -2.9129 | 0.949994 | 0.0146641 death associated protein kinase 1                                  |
| 410 | 8098732 DBET///DL | 2.4953582  | -3.1988 | 0.519836 | 0.0219501 D4Z4 binding element transcript (non-protein coding)///double hor  |
| 411 | 8098740 DBET///DL | 2.4953582  | -3.1988 | 0.519836 | 0.0219501 D4Z4 binding element transcript (non-protein coding)///double hor  |
| 412 | 8124196 DCDC2     | -2.5846933 | -3.0648 | -2.42887 | 0.0181649 doublecortin domain containing 2                                   |
| 413 | 7947282 DCDC5     | -2.4240796 | -3.3044 | -1.52635 | 0.0254892 doublecortin domain containing 5                                   |
| 414 | 7932186 DCLRE1C   | 2.7387505  | -2.83   | 0.61964  | 0.0130461 DNA cross-link repair 1C                                           |
| 415 | 7960320 DCP1B     | -2.8962379 | -2.5859 | -0.76446 | 0.0092523 decapping mRNA 1B                                                  |
| 416 | 8147830 DCSTAMP   | -2.3195054 | -3.457  | -3.97549 | 0.0316548 dendrocyte expressed seven transmembrane protein                   |
| 417 | 7964466 DCTN2     | -2.3439789 | -3.4216 | -0.4274  | 0.0300989 dynactin subunit 2                                                 |
| 418 | 8092321 DCUN1D1   | -2.3171628 | -3.4604 | -0.44909 | 0.0318075 defective in cullin neddylation 1 domain containing 1              |
| 419 | 8000028 DCUN1D3   | -2.1972621 | -3.6315 | -0.64577 | 0.0405994 defective in cullin neddylation 1 domain containing 3              |
| 420 | 7898211 DD12///RS | -2.1179541 | -3.7422 | -0.40967 | 0.0475834 DNA damage inducible 1 homolog 2///regulatory solute carrier prot  |
| 421 | 8128843 DDO       | -2.9332029 | -2.5282 | -0.72632 | 0.0085296 D-aspartate oxidase                                                |
| 422 | 8117900 DDR1      | -2.3482122 | -3.4154 | -0.63007 | 0.029837 discoidin domain receptor tyrosine kinase 1                         |
| 423 | 8177867 DDR1      | -2.3482122 | -3.4154 | -0.63007 | 0.029837 discoidin domain receptor tyrosine kinase 1                         |
| 424 | 8179184 DDR1      | -2.3482122 | -3.4154 | -0.63007 | 0.029837 discoidin domain receptor tyrosine kinase 1                         |
| 425 | 8054758 DDX11L9// | -2.3921322 | -3.3513 | -1.09656 | 0.0272426 DEAD/H-box helicase 11 like 9///DEAD/H-box helicase 11 like 5///DI |
| 426 | 8166440 DDX53     | 3.0017113  | -2.4207 | 0.769566 | 0.0073316 DEAD-box helicase 53                                               |
| 427 | 8157477 DEC1      | 3.3568095  | -1.8582 | 0.903873 | 0.0033111 deleted in esophageal cancer 1                                     |
| 428 | 8118932 DEF6      | 2.804228   | -2.7289 | 0.762804 | 0.011316 DEF6, guanine nucleotide exchange factor                            |
| 429 | 8126939 DEFB110   | -2.463084  | -3.2468 | -0.67277 | 0.0234913 defensin beta 110                                                  |
| 430 | 7981278 DEGS2     | -2.3963696 | -3.3451 | -1.6488  | 0.0270038 delta 4-desaturase, sphingolipid 2                                 |
| 431 | 7923131 DENND1B   | -2.8554671 | -2.6494 | -1.15081 | 0.0101177 DENN domain containing 1B                                          |
| 432 | 7923141 DENND1B   | -2.8166451 | -2.7097 | -1.1599  | 0.0110137 DENN domain containing 1B                                          |
| 433 | 7965760 DEPDC4    | -3.461523  | -1.6914 | -3.93577 | 0.0026126 DEP domain containing 4                                            |
| 434 | 8074944 DERL3     | 2.5089674  | -3.1785 | 1.061992 | 0.0213291 derlin 3                                                           |
| 435 | 8071179 DGCR6     | -2.2743574 | -3.522  | -0.79055 | 0.034722 DiGeorge syndrome critical region gene 6                            |
| 436 | 7916432 DHCR24    | -2.6727655 | -2.9311 | -1.51348 | 0.0150433 24-dehydrocholesterol reductase                                    |

|     |                    |            |         |          |           |                                                                         |
|-----|--------------------|------------|---------|----------|-----------|-------------------------------------------------------------------------|
| 437 | 7963020 DHH        | 2.1547435  | -3.6911 | 0.439706 | 0.0442179 | desert hedgehog                                                         |
| 438 | 8034454 DHP5       | -3.7376111 | -1.2519 | -0.76904 | 0.0013941 | deoxyhypusine synthase                                                  |
| 439 | 8099649 DHX15      | -3.1605826 | -2.17   | -0.58299 | 0.0051474 | DEAH-box helicase 15                                                    |
| 440 | 7909478 DIEXF      | -2.1799334 | -3.6558 | -0.52422 | 0.0420402 | digestive organ expansion factor homolog (zebrafish)                    |
| 441 | 8097811 DKFZP434I  | 2.1441392  | -3.7058 | 0.387445 | 0.0451651 | uncharacterized protein DKFZP434I0714                                   |
| 442 | 7927631 DKK1       | -2.4306473 | -3.2947 | -4.03876 | 0.025142  | dickkopf WNT signaling pathway inhibitor 1                              |
| 443 | 8168179 DLG3       | -2.6234538 | -3.0061 | -0.75664 | 0.0167221 | discs large MAGUK scaffold protein 3                                    |
| 444 | 8144253 DLGAP2     | 2.272361   | -3.5248 | 0.390161 | 0.0348637 | DLG associated protein 2                                                |
| 445 | 7931108 DMBT1      | -2.6582114 | -2.9533 | -3.63236 | 0.0155214 | deleted in malignant brain tumors 1                                     |
| 446 | 8154034 DMRT1      | 2.10669    | -3.7577 | 0.624963 | 0.0486594 | doublesex and mab-3 related transcription factor 1                      |
| 447 | 7910030 DNAH14     | -2.6505274 | -2.965  | -0.99854 | 0.0157796 | dynein axonemal heavy chain 14                                          |
| 448 | 7910047 DNAH14     | -2.4218356 | -3.3077 | -1.24003 | 0.0256088 | dynein axonemal heavy chain 14                                          |
| 449 | 8111019 DNAH5      | -3.9464203 | -0.9215 | -5.49175 | 0.0008654 | dynein axonemal heavy chain 5                                           |
| 450 | 8057821 DNAH7      | -3.0497761 | -2.3451 | -1.6773  | 0.0065901 | dynein axonemal heavy chain 7                                           |
| 451 | 7985147 DNAJA4     | -2.16927   | -3.6708 | -0.81459 | 0.0429498 | DnaJ heat shock protein family (Hsp40) member A4                        |
| 452 | 7933933 DNAJC12    | -2.4244595 | -3.3038 | -2.19883 | 0.025469  | DnaJ heat shock protein family (Hsp40) member C12                       |
| 453 | 8082688 DNAJC13    | -2.728756  | -2.8453 | -0.50451 | 0.0133314 | DnaJ heat shock protein family (Hsp40) member C13                       |
| 454 | 7963935 DNAJC14    | -2.594422  | -3.0501 | -0.52433 | 0.0177921 | DnaJ heat shock protein family (Hsp40) member C14                       |
| 455 | 7898192 DNAJC16    | -4.4393582 | -0.1559 | -0.76581 | 0.0002811 | DnaJ heat shock protein family (Hsp40) member C16                       |
| 456 | 7974190 DNAJC19    | -2.5495936 | -3.1176 | -0.58686 | 0.0195721 | DnaJ heat shock protein family (Hsp40) member C19                       |
| 457 | 7955211 DNAJC22    | -3.4211708 | -1.7557 | -4.70241 | 0.0028627 | DnaJ heat shock protein family (Hsp40) member C22                       |
| 458 | 8114625 DND1       | 2.1746756  | -3.6632 | 0.54912  | 0.0424865 | DND microRNA-mediated repression inhibitor 1                            |
| 459 | 8070730 DNMT3L     | 2.4160667  | -3.3162 | 0.752888 | 0.0259188 | DNA methyltransferase 3 like                                            |
| 460 | 8059222 DNPEP      | -2.3575196 | -3.4019 | -0.4629  | 0.0292688 | aspartyl aminopeptidase                                                 |
| 461 | 8109843 DOCK2      | 2.2158465  | -3.6053 | 0.979224 | 0.0391046 | dedicator of cytokinesis 2                                              |
| 462 | 8149638 DOK2       | 2.3805646  | -3.3683 | 0.751418 | 0.0279048 | docking protein 2                                                       |
| 463 | 8056222 DPP4       | 2.6046209  | -3.0346 | 1.658572 | 0.017409  | dipeptidyl peptidase 4                                                  |
| 464 | 7953665 DPPA3      | 3.2558369  | -2.0188 | 0.757416 | 0.0041572 | developmental pluripotency associated 3                                 |
| 465 | 8051387 DPY30      | -2.3665784 | -3.3887 | -0.53462 | 0.0287254 | dpy-30, histone methyltransferase complex regulatory subunit            |
| 466 | 8005289 DRC3       | -2.2930047 | -3.4952 | -1.15838 | 0.0334233 | dynein regulatory complex subunit 3                                     |
| 467 | 7951703 DRD2       | 2.2351142  | -3.4344 | 0.380763 | 0.0306541 | dopamine receptor D2                                                    |
| 468 | 8050846 DTNB       | 2.4165324  | -3.3155 | 0.550869 | 0.0258937 | dystrobrevin beta                                                       |
| 469 | 8113691 DTWD2      | -3.0179958 | -2.3951 | -0.75273 | 0.0070718 | DTW domain containing 2                                                 |
| 470 | 7958931 DTX1       | 2.0990427  | -3.7682 | 0.493321 | 0.0494025 | deltex E3 ubiquitin ligase 1                                            |
| 471 | 7934533 DUSP13     | -2.3617741 | -3.3957 | -0.61154 | 0.0290124 | dual specificity phosphatase 13                                         |
| 472 | 8116548 DUSP22     | 2.2619796  | -3.5397 | 0.66041  | 0.0356095 | dual specificity phosphatase 22                                         |
| 473 | 8049684 DUSP28     | -2.4055386 | -3.3317 | -0.50789 | 0.0264936 | dual specificity phosphatase 28                                         |
| 474 | 8150076 DUSP4      | -2.39774   | -3.3431 | -1.56518 | 0.0269269 | dual specificity phosphatase 4                                          |
| 475 | 8098725 DUX4//DU   | 2.5715042  | -3.0847 | 0.548578 | 0.0186821 | double homeobox 4//double homeobox 1//double homeobox 3//               |
| 476 | 8104122 DUX4//DU   | 2.2455705  | -3.5631 | 0.438062 | 0.0368183 | double homeobox 4//double homeobox 1//double homeobox 5                 |
| 477 | 8046340 DYNC112    | -2.5703707 | -3.0864 | -0.4684  | 0.0187271 | dynein cytoplasmic 1 intermediate chain 2                               |
| 478 | 8180311 DYNC112    | -2.2728552 | -3.5241 | -0.33363 | 0.0348286 | dynein cytoplasmic 1 intermediate chain 2                               |
| 479 | 8172035 DYNLT3     | -4.2113712 | -0.507  | -1.13976 | 0.0004725 | dynein light chain Tctex-type 3                                         |
| 480 | 8065202 DZANK1     | -2.8448538 | -2.6659 | -0.81864 | 0.0103555 | double zinc ribbon and ankyrin repeat domains 1                         |
| 481 | 7972336 DZIP1      | 2.9274817  | -2.5371 | 1.407698 | 0.0086378 | DAZ interacting zinc finger protein 1                                   |
| 482 | 7978558 EAPP       | -2.4932736 | -3.2019 | -0.54193 | 0.0220467 | E2F associated phosphoprotein                                           |
| 483 | 8067652 EEF1A2     | -3.3219579 | -1.9137 | -3.0956  | 0.0035821 | eukaryotic translation elongation factor 1 alpha 2                      |
| 484 | 8123819 EEF1E1-BL1 | -2.3913816 | -3.3524 | -0.62353 | 0.0272852 | EEF1E1-BLOC1S5 readthrough (NMD candidate)//eukaryotic translat         |
| 485 | 7993946 EEF2K      | -2.1393565 | -3.7125 | -0.53304 | 0.0455982 | eukaryotic elongation factor 2 kinase                                   |
| 486 | 7999304 EEF2KMT    | -2.3465822 | -3.4178 | -0.51779 | 0.0299376 | eukaryotic elongation factor 2 lysine methyltransferase                 |
| 487 | 7911096 EFCAB2     | -3.2696481 | -1.9969 | -1.39862 | 0.00403   | EF-hand calcium binding domain 2                                        |
| 488 | 8076612 EFCAB6     | -3.7957346 | -1.1597 | -1.13537 | 0.0012209 | EF-hand calcium binding domain 6                                        |
| 489 | 8120222 EFHC1      | -3.0211825 | -2.3901 | -0.81804 | 0.007022  | EF-hand domain containing 1                                             |
| 490 | 8049187 EFHD1      | -2.263568  | -3.5374 | -1.7407  | 0.0354945 | EF-hand domain family member D1                                         |
| 491 | 7933872 EGR2       | 5.5365258  | 1.4308  | 2.164128 | 0.0000243 | early growth response 2                                                 |
| 492 | 7941311 EHBP1L1//  | 2.3942052  | -3.3483 | 0.532997 | 0.0271255 | EH domain binding protein 1 like 1//signal-induced proliferation-as     |
| 493 | 8041225 EHD3       | 2.4277749  | -3.299  | 0.795064 | 0.0252933 | EH domain containing 3                                                  |
| 494 | 8078962 EIF1B      | 2.196745   | -3.6322 | 0.488936 | 0.0406417 | eukaryotic translation initiation factor 1B                             |
| 495 | 7988283 EIF3J-AS1  | -2.4200292 | -3.3104 | -0.67256 | 0.0257055 | EIF3J antisense RNA 1 (head to head)                                    |
| 496 | 8021222 ELAC1      | -2.5159412 | -3.1681 | 0.682298 | 0.0210173 | elaC ribonuclease Z 1                                                   |
| 497 | 7947481 ELF5       | 3.1001204  | -2.2656 | 3.861275 | 0.0058915 | E74 like ETS transcription factor 5                                     |
| 498 | 8131096 ELFN1      | 2.1213427  | -3.7375 | 0.415791 | 0.047264  | extracellular leucine rich repeat and fibronectin type III domain conti |
| 499 | 8180411 ELMO1      | 2.4794012  | -3.2225 | 1.016925 | 0.0226999 | engulfment and cell motility 1                                          |
| 500 | 7996468 ELMO3      | -3.6534623 | -1.3857 | -1.75664 | 0.0016889 | engulfment and cell motility 3                                          |
| 501 | 7943562 ELMOD1     | -2.3897715 | -3.3548 | -0.39817 | 0.0273766 | ELMO domain containing 1                                                |
| 502 | 8097529 ELMOD2     | -2.8674333 | -2.6308 | -0.73847 | 0.009856  | ELMO domain containing 2                                                |
| 503 | 8123920 ELOVL2     | -2.2256901 | -3.5913 | -2.25144 | 0.0383334 | ELOVL fatty acid elongase 2                                             |
| 504 | 8086784 ELP6       | -2.3836466 | -3.3637 | -0.67512 | 0.0277269 | elongator acetyltransferase complex subunit 6                           |
| 505 | 7982507 EMC4//EM   | -2.548493  | -3.1193 | -0.55235 | 0.0196178 | ER membrane protein complex subunit 4//ER membrane protein co           |
| 506 | 8041592 EML4//AL   | 2.3894751  | -3.3552 | 0.592455 | 0.0273934 | echinoderm microtubule associated protein like 4//anaplastic lymph      |
| 507 | 7999387 EMP2       | -2.7317426 | -2.8407 | -1.18087 | 0.0132456 | epithelial membrane protein 2                                           |
| 508 | 8010295 ENGASE     | 2.5135842  | -3.1716 | 0.43459  | 0.0211222 | endo-beta-N-acetylglucosaminidase                                       |
| 509 | 8122099 ENPP1      | -3.5780532 | -1.5057 | -1.85046 | 0.0020051 | ectonucleotide pyrophosphatase/phosphodiesterase 1                      |



|     |                   |            |         |          |           |                                                                      |
|-----|-------------------|------------|---------|----------|-----------|----------------------------------------------------------------------|
| 510 | 8126750 ENPP5     | -2.4963957 | -3.1972 | -1.33375 | 0.0219022 | ectonucleotide pyrophosphatase/phosphodiesterase 5 (putative)        |
| 511 | 7899534 EPB41     | 2.2264655  | -3.5902 | 0.542129 | 0.0382733 | erythrocyte membrane protein band 4.1                                |
| 512 | 8044882 EPB41L5   | -4.0607923 | -0.7418 | -0.92471 | 0.0006664 | erythrocyte membrane protein band 4.1 like 5                         |
| 513 | 8128284 EPHA7     | 4.0472705  | -0.763  | 2.350459 | 0.0006873 | EPH receptor A7                                                      |
| 514 | 8082846 EPHB1     | 3.227523   | -2.0638 | 1.322291 | 0.0044302 | EPH receptor B1                                                      |
| 515 | 8136811 EPHB6     | 2.7597675  | -2.7976 | 0.972676 | 0.0124649 | EPH receptor B6                                                      |
| 516 | 7956120 ERBB3     | -2.1221146 | -3.7364 | -0.81951 | 0.0471915 | erb-b2 receptor tyrosine kinase 3                                    |
| 517 | 8058627 ERBB4     | -2.5684917 | -3.0892 | -1.91031 | 0.0188021 | erb-b2 receptor tyrosine kinase 4                                    |
| 518 | 8000013 ERI2      | -3.1994151 | -2.1084 | -0.94816 | 0.0047186 | ERI1 exoribonuclease family member 2                                 |
| 519 | 8148985 ERICH1    | 2.5173156  | -3.166  | 0.683951 | 0.0209564 | glutamate rich 1                                                     |
| 520 | 8123467 ERMARD    | -3.2091515 | -2.093  | -0.72425 | 0.0046167 | ER membrane associated RNA degradation                               |
| 521 | 7976642 ERVH-4    | -2.2619886 | -3.5397 | -0.73165 | 0.0356089 | endogenous retrovirus group H member 4                               |
| 522 | 8122843 ESR1      | -2.6566446 | -2.9556 | -3.41477 | 0.0155737 | estrogen receptor 1                                                  |
| 523 | 7954701 ETFBKMT   | -2.2592239 | -3.5436 | -0.89812 | 0.0358099 | electron transfer flavoprotein beta subunit lysine methyltransferase |
| 524 | 7952601 ETS1      | 2.2492046  | -3.5579 | 0.885207 | 0.0365474 | ETS proto-oncogene 1, transcription factor                           |
| 525 | 8092578 ETV5      | 2.2339689  | -3.5796 | 0.965137 | 0.0376957 | ETS variant 5                                                        |
| 526 | 7984511 EWSAT1    | -2.2379653 | -3.5739 | -3.11471 | 0.0373913 | Ewing sarcoma associated transcript 1                                |
| 527 | 7912385 EXOSC10   | -2.6631457 | -2.9457 | -0.35429 | 0.0153577 | exosome component 10                                                 |
| 528 | 8127396 EYS       | -2.2464718 | -3.5618 | -1.05215 | 0.036751  | eyes shut homolog (Drosophila)                                       |
| 529 | 7922174 F5        | 2.0944224  | -3.7746 | 1.682887 | 0.0498564 | coagulation factor V                                                 |
| 530 | 8167930 FAAH2     | -3.0085693 | -2.41   | -0.78263 | 0.0072211 | fatty acid amide hydrolase 2                                         |
| 531 | 8018251 FADS6     | 2.905043   | -2.5722 | 0.804834 | 0.009075  | fatty acid desaturase 6                                              |
| 532 | 7985268 FAH       | -2.4404915 | -3.2802 | -0.95559 | 0.0246299 | fumarylacetoacetate hydrolase                                        |
| 533 | 8043564 FAHD2A    | 2.2057458  | -3.6195 | 0.577982 | 0.0399107 | fumarylacetoacetate hydrolase domain containing 2A                   |
| 534 | 8018097 FAM104A   | -2.1521437 | -3.6947 | -0.37747 | 0.0444484 | family with sequence similarity 104 member A                         |
| 535 | 7940153 FAM111A   | -2.9467974 | -2.5069 | -1.01001 | 0.0082777 | family with sequence similarity 111 member A                         |
| 536 | 8162466 FAM120AC  | -3.4843425 | -1.655  | -0.76475 | 0.0024808 | family with sequence similarity 120A opposite strand                 |
| 537 | 8026787 FAM129C   | 2.297327   | -3.489  | 1.439284 | 0.0331288 | family with sequence similarity 129 member C                         |
| 538 | 8120552 FAM135A   | 2.5104119  | -3.1763 | 0.886355 | 0.0212642 | family with sequence similarity 135 member A                         |
| 539 | 7932243 FAM171A1  | 3.1505149  | -2.1859 | 1.482906 | 0.0052646 | family with sequence similarity 171 member A1                        |
| 540 | 7973918 FAM177A1  | -2.7577384 | -2.8007 | -0.75708 | 0.01252   | family with sequence similarity 177 member A1                        |
| 541 | 7974125 FAM179B   | -2.2522297 | -3.5536 | -0.69798 | 0.0363233 | family with sequence similarity 179 member B                         |
| 542 | 8139160 FAM183BP  | -2.6070545 | -3.031  | -0.73549 | 0.0173188 | acyloxyacyl hydrolase (neutrophil)                                   |
| 543 | 8088219 FAM208A   | -2.2038016 | -3.6223 | -0.47131 | 0.0400675 | family with sequence similarity 208 member A                         |
| 544 | 8017867 FAM20A    | 2.8721991  | -2.6234 | 1.461276 | 0.0097535 | family with sequence similarity 20 member A                          |
| 545 | 7897119 FAM213B   | -2.1562338 | -3.689  | -0.65772 | 0.0440863 | family with sequence similarity 213 member B                         |
| 546 | 7988970 FAM214A   | -3.0125052 | -2.4038 | -0.93808 | 0.0071584 | family with sequence similarity 214 member A                         |
| 547 | 8131881 FAM221A   | -2.9543563 | -2.4951 | -1.10209 | 0.0081408 | family with sequence similarity 221 member A                         |
| 548 | 8161154 FAM221B   | -2.1907495 | -3.6406 | -0.67006 | 0.0411355 | family with sequence similarity 221 member B                         |
| 549 | 7988625 FAM227B   | -2.9271929 | -2.5376 | -1.16289 | 0.0086433 | family with sequence similarity 227 member B                         |
| 550 | 8074734 FAM230B   | -2.2840324 | -3.5081 | -0.70868 | 0.0340425 | family with sequence similarity 230 member B (non-protein coding)    |
| 551 | 8005739 FAM27E5   | 2.5801889  | -3.0716 | 0.47933  | 0.01834   | family with sequence similarity E5                                   |
| 552 | 7977445 FAM30A    | 2.5101867  | -3.1767 | 1.097236 | 0.0212743 | family with sequence similarity 30, member A                         |
| 553 | 7928909 FAM35A    | -2.2004169 | -3.627  | -0.48112 | 0.040342  | family with sequence similarity 35 member A                          |
| 554 | 8084891 FAM43A    | 2.0977445  | -3.77   | 0.552145 | 0.0495296 | family with sequence similarity 43 member A                          |
| 555 | 8127778 FAM46A    | 2.1974438  | -3.6312 | 0.933487 | 0.0405845 | family with sequence similarity 46 member A                          |
| 556 | 7914015 FAM46B    | -2.3854892 | -3.3611 | -1.00787 | 0.0276211 | family with sequence similarity 46 member B                          |
| 557 | 8095819 FAM47E-S' | -3.3033191 | -1.9433 | -2.80977 | 0.0037358 | FAM47E-STBD1 readthrough///family with sequence similarity 47 me     |
| 558 | 8095826 FAM47E-S' | -2.7733139 | -2.7767 | -0.92549 | 0.0121036 | FAM47E-STBD1 readthrough///starch binding domain 1                   |
| 559 | 8050427 FAM49A    | 2.7574492  | -2.8012 | 1.1221   | 0.0125278 | family with sequence similarity 49 member A                          |
| 560 | 8116658 FAM50B    | -2.9973807 | -2.4275 | -0.64713 | 0.0074023 | family with sequence similarity 50 member B                          |
| 561 | 7919872 FAM63A    | -2.2637394 | -3.5372 | -0.87331 | 0.0354821 | family with sequence similarity 63 member A                          |
| 562 | 7983940 FAM63B    | -2.8541094 | -2.6515 | -0.77032 | 0.0101478 | family with sequence similarity 63 member B                          |
| 563 | 8124280 FAM65B    | 3.2836935  | -1.9745 | 2.00247  | 0.0039046 | family with sequence similarity 65 member B                          |
| 564 | 7960881 FAM90A1   | 2.5795693  | -3.0725 | 0.383266 | 0.0183642 | family with sequence similarity 90 member A1                         |
| 565 | 7937707 FAM99A    | 2.3500081  | -3.4128 | 0.784532 | 0.0297266 | family with sequence similarity 99 member A (non-protein coding)     |
| 566 | 8033487 FBN3      | 2.7178247  | -2.8621 | 0.793523 | 0.0136504 | fibrillin 3                                                          |
| 567 | 7996423 FBXL8     | -2.6339043 | -2.9902 | -0.5768  | 0.0163522 | F-box and leucine rich repeat protein 8                              |
| 568 | 8023843 FBXO15    | -2.6781369 | -2.9229 | -1.63675 | 0.0148704 | F-box protein 15                                                     |
| 569 | 8036676 FBXO17    | 2.2969236  | -3.4896 | 0.812279 | 0.0331561 | F-box protein 17                                                     |
| 570 | 7966760 FBXO21    | -2.5376114 | -3.1356 | -0.45141 | 0.0200756 | F-box protein 21                                                     |
| 571 | 7985053 FBXO22    | -2.9337975 | -2.5272 | -0.4523  | 0.0085184 | F-box protein 22                                                     |
| 572 | 7912750 FBXO42    | -2.1772029 | -3.6597 | -0.37753 | 0.0422714 | F-box protein 42                                                     |
| 573 | 8103755 FBXO8     | -2.3388596 | -3.429  | -0.55476 | 0.0304183 | F-box protein 8                                                      |
| 574 | 8120251 FBXO9     | -2.7928613 | -2.7465 | -0.47055 | 0.0115997 | F-box protein 9                                                      |
| 575 | 8103206 FBXW7     | 2.1497674  | -3.698  | 0.610901 | 0.0446601 | F-box and WD repeat domain containing 7                              |
| 576 | 8033420 FCER2     | 2.9165308  | -2.5542 | 2.096722 | 0.0088485 | Fc fragment of IgE receptor II                                       |
| 577 | 8026830 FCHO1     | 2.3178764  | -3.4594 | 0.816884 | 0.0317609 | FCH domain only 1                                                    |
| 578 | 7923917 FCMR      | 3.1400914  | -2.2024 | 2.05797  | 0.0053887 | Fc fragment of IgM receptor                                          |
| 579 | 7921319 FCRL1     | 2.3024996  | -3.4816 | 2.076446 | 0.0327794 | Fc receptor like 1                                                   |
| 580 | 7921298 FCRL2     | 3.1304302  | -2.2177 | 1.753422 | 0.0055063 | Fc receptor like 2                                                   |
| 581 | 7921275 FCRL3     | 2.652541   | -2.9619 | 1.693595 | 0.0157115 | Fc receptor like 3                                                   |
| 582 | 7921237 FCRL5     | 3.0158086  | -2.3986 | 1.666464 | 0.0071061 | Fc receptor like 5                                                   |

|     |                    |            |         |          |                                                                               |
|-----|--------------------|------------|---------|----------|-------------------------------------------------------------------------------|
| 583 | 7906475 FCRL6      | 2.7121606  | -2.8708 | 0.594871 | 0.0138184 Fc receptor like 6                                                  |
| 584 | 7906786 FCRLA      | 2.6877288  | -2.9082 | 1.405106 | 0.0145664 Fc receptor like A                                                  |
| 585 | 8095467 FDCSP      | 3.6117199  | -1.4521 | 4.028388 | 0.0018573 follicular dendritic cell secreted protein                          |
| 586 | 7951654 FDXACB1    | -2.4468646 | -3.2708 | -0.66918 | 0.0243036 ferredoxin-fold anticodon binding domain containing 1               |
| 587 | 8024898 FEM1A      | -2.1760867 | -3.6612 | -0.33505 | 0.0423663 fem-1 homolog A                                                     |
| 588 | 7984470 FEM1B      | -2.1652221 | -3.6764 | -0.3949  | 0.0432998 fem-1 homolog B                                                     |
| 589 | 8113616 FEM1C      | -2.2113955 | -3.6115 | -0.42644 | 0.0394579 fem-1 homolog C                                                     |
| 590 | 8065948 FER1L4     | 3.3585184  | -1.8555 | 1.550651 | 0.0032984 fer-1 like family member 4, pseudogene                              |
| 591 | 8065920 FER1L4     | 3.0643805  | -2.3221 | 1.086961 | 0.0063796 fer-1 like family member 4, pseudogene                              |
| 592 | 7954729 FGD4       | 2.9950625  | -2.4312 | 0.594132 | 0.0074403 FYVE, RhoGEF and PH domain containing 4                             |
| 593 | 7950036 FGF3       | 2.1824367  | -3.6523 | 0.502877 | 0.0418292 fibroblast growth factor 3                                          |
| 594 | 7967993 FGF9       | 2.9123953  | -2.5607 | 2.111544 | 0.0089294 fibroblast growth factor 9                                          |
| 595 | 8123342 FGFRL1OP   | -2.310378  | -3.4702 | -0.68658 | 0.0322539 FGFR1 oncogene partner                                              |
| 596 | 7914112 FGR        | 2.1176465  | -3.7426 | 0.731168 | 0.0476125 FGR proto-oncogene, Src family tyrosine kinase                      |
| 597 | 8029847 FKRP       | 2.3379372  | -3.4303 | 0.458215 | 0.0304762 fukutin related protein                                             |
| 598 | 8030578 FLJ26850   | -2.5056848 | -3.1834 | -0.51563 | 0.0214773 FLJ26850 protein                                                    |
| 599 | 8073939 FLJ44385   | -2.1252614 | -3.732  | -0.67423 | 0.046897 uncharacterized FLJ44385                                             |
| 600 | 7952673 FLJ45950   | -2.6512906 | -2.9638 | -2.06157 | 0.0157537 FLJ45950 protein                                                    |
| 601 | 7940851 FLRT1      | 2.1204972  | -3.7386 | 0.325243 | 0.0473435 fibronectin leucine rich transmembrane protein 1                    |
| 602 | 7987145 FMN1       | -2.6708246 | -2.934  | -0.80022 | 0.0151062 formin 1                                                            |
| 603 | 8007757 FMNL1      | 3.3846366  | -1.8139 | 1.123759 | 0.0031093 formin like 1                                                       |
| 604 | 8045736 FMNL2      | 2.6961866  | -2.8953 | 1.058435 | 0.0143032 formin like 2                                                       |
| 605 | 8113914 FNIP1      | -2.9438151 | -2.5116 | -0.54094 | 0.0083324 folliculin interacting protein 1                                    |
| 606 | 8146268 FNTA       | 2.520989   | -3.1605 | 0.618471 | 0.0207943 farnesyltransferase, CAAX box, alpha                                |
| 607 | 7999718 FOPNL      | -3.1749229 | -2.1472 | -1.0467  | 0.0049848 FGFR1OP N-terminal like                                             |
| 608 | 7978706 FOXA1      | -3.2083697 | -2.0942 | -2.63738 | 0.0046248 forkhead box A1                                                     |
| 609 | 7931348 FOXI2      | 2.6878561  | -2.908  | 0.576953 | 0.0145624 forkhead box I2                                                     |
| 610 | 8121365 FOXO3      | 2.2903725  | -3.499  | 0.546327 | 0.0336039 forkhead box O3                                                     |
| 611 | 8160168 FREM1      | 2.7410323  | -2.8264 | 2.022785 | 0.0129818 FRAS1 related extracellular matrix 1                                |
| 612 | 8061497 FRG1BP     | -2.6295307 | -2.9969 | -1.01121 | 0.016506 FSHD region gene 1 family member B, pseudogene                       |
| 613 | 7987426 FSIP1      | -2.637637  | -2.9846 | -2.84409 | 0.0162219 fibrous sheath interacting protein 1                                |
| 614 | 8023995 FSTL3      | -3.3870554 | -1.81   | -0.98124 | 0.0030924 follistatin like 3                                                  |
| 615 | 7948656 FTH1       | -2.2389633 | -3.5725 | -0.33557 | 0.0373157 ferritin heavy chain 1                                              |
| 616 | 8170360 FTH1P5///I | -2.3890771 | -3.3558 | -0.36917 | 0.0274161 ferritin heavy chain 1 pseudogene 5///ferritin heavy chain 1 pseudo |
| 617 | 8158686 FUBP3      | -2.4817152 | -3.2191 | -0.50749 | 0.0225897 far upstream element binding protein 3                              |
| 618 | 7937208 FUOM       | 2.4182967  | -3.3129 | 0.481072 | 0.0257986 fucose mutarotase                                                   |
| 619 | 8165398 FUT7       | 2.6973266  | -2.8935 | 0.58562  | 0.0142681 fucosyltransferase 7                                                |
| 620 | 8027748 FXYD3      | -3.5787016 | -1.5047 | -2.00152 | 0.0020022 FXYD domain containing ion transport regulator 3                    |
| 621 | 8128956 FYN        | 2.2808494  | -3.5127 | 0.852526 | 0.0342646 FYN proto-oncogene, Src family tyrosine kinase                      |
| 622 | 7959850 FZD10      | 2.2060907  | -3.619  | 0.426431 | 0.0398829 frizzled class receptor 10                                          |
| 623 | 8047487 FZD7       | 3.4102981  | -1.773  | 1.311747 | 0.002934 frizzled class receptor 7                                            |
| 624 | 8007561 G6PC3      | -2.1021069 | -3.764  | -0.68071 | 0.0491035 glucose-6-phosphatase catalytic subunit 3                           |
| 625 | 8074212 GAB4       | 2.5385209  | -3.1342 | 0.398786 | 0.0200369 GRB2 associated binding protein family member 4                     |
| 626 | 8109677 GABRG2     | -2.0989059 | -3.7684 | -0.56454 | 0.0494159 gamma-aminobutyric acid type A receptor gamma2 subunit              |
| 627 | 8109407 GALNT10    | -2.433505  | -3.2905 | -0.75174 | 0.0249923 polypeptide N-acetylgalactosaminyltransferase 10                    |
| 628 | 8098328 GALNT7     | -2.6942382 | -2.8982 | -1.23365 | 0.0143634 polypeptide N-acetylgalactosaminyltransferase 7                     |
| 629 | 8154916 GALT       | 2.106334   | -3.7582 | 0.544894 | 0.0486938 galactose-1-phosphate uridylyltransferase                           |
| 630 | 8132929 GBAS       | -2.1103124 | -3.7527 | -0.47773 | 0.048311 glioblastoma amplified sequence                                      |
| 631 | 8088958 GBE1       | -2.4657004 | -3.2429 | -0.71059 | 0.0233627 glucan (1,4-alpha-), branching enzyme 1                             |
| 632 | 8040479 GDF7       | 2.1127845  | -3.7493 | 0.347173 | 0.0480745 growth differentiation factor 7                                     |
| 633 | 8000799 GDDP3      | -2.4945696 | -3.2    | -2.79235 | 0.0219866 glycerophosphodiester phosphodiesterase domain containing 3         |
| 634 | 8149629 GFRA2      | 4.372468   | -0.2583 | 1.289372 | 0.0003273 GDNF family receptor alpha 2                                        |
| 635 | 8114415 GFRA3      | 4.0526348  | -0.7546 | 4.131013 | 0.0006789 GDNF family receptor alpha 3                                        |
| 636 | 7928752 GHITM      | -2.4912889 | -3.2048 | -0.71153 | 0.0221391 growth hormone inducible transmembrane protein                      |
| 637 | 8085293 GHRL       | -2.2879572 | -3.5025 | -0.6165  | 0.0337703 ghrelin/obestatin prepropeptide                                     |
| 638 | 8141371 GJC3       | -2.1059419 | -3.7587 | -1.27124 | 0.0487317 gap junction protein gamma 3                                        |
| 639 | 7927028 GJD4       | 2.3331788  | -3.4372 | 0.445443 | 0.0307765 gap junction protein delta 4                                        |
| 640 | 8101256 GK2        | -2.2788735 | -3.5155 | -1.01881 | 0.0344032 glycerol kinase 2                                                   |
| 641 | 8086028 GLB1       | 2.1109527  | -3.7518 | 0.58217  | 0.0482497 galactosidase beta 1                                                |
| 642 | 7957253 GLIPR1L2   | -2.438176  | -3.2836 | -1.02843 | 0.0247495 GLI pathogenesis-related 1 like 2                                   |
| 643 | 8155192 GLIPR2     | 2.5751629  | -3.0791 | 0.973374 | 0.0185372 GLI pathogenesis related 2                                          |
| 644 | 7916304 GLIS1      | 2.3510499  | -3.4113 | 0.664376 | 0.0296627 GLIS family zinc finger 1                                           |
| 645 | 8174263 GLRA4      | 2.2641714  | -3.5365 | 0.592425 | 0.0354508 glycine receptor alpha 4                                            |
| 646 | 7966259 GLTP       | -2.6632331 | -2.9456 | -0.47246 | 0.0153548 glycolipid transfer protein                                         |
| 647 | 8003948 GLTPD2     | 2.1619295  | -3.681  | 0.379458 | 0.0435864 glycolipid transfer protein domain containing 2                     |
| 648 | 8169711 GLUD2      | -2.2125851 | -3.6099 | -0.56782 | 0.0393632 glutamate dehydrogenase 2                                           |
| 649 | 8154951 GLUL       | -2.6681615 | -2.9381 | -0.70245 | 0.015193 glutamate-ammonia ligase                                             |
| 650 | 7922689 GLUL       | -2.6019943 | -3.0386 | -0.742   | 0.0175069 glutamate-ammonia ligase                                            |
| 651 | 7979260 GMFB       | -2.6169525 | -3.016  | -0.57891 | 0.0169563 glia maturation factor beta                                         |
| 652 | 8024557 GNA11      | -3.2562131 | -2.0182 | -0.5989  | 0.0041537 G protein subunit alpha 11                                          |
| 653 | 7916843 GNG12      | -2.5261176 | -3.1528 | -0.8243  | 0.02057 G protein subunit gamma 12                                            |
| 654 | 7925250 GNG4       | 2.1715465  | -3.6676 | 1.496529 | 0.0427541 G protein subunit gamma 4                                           |
| 655 | 8037785 GNG8       | 2.1436573  | -3.7065 | 0.464996 | 0.0452085 G protein subunit gamma 8                                           |

|     |         |           |            |         |          |           |                                                                       |
|-----|---------|-----------|------------|---------|----------|-----------|-----------------------------------------------------------------------|
| 656 | 7965746 | GOLGA2P5  | -2.9326479 | -2.529  | -0.88602 | 0.00854   | golgin A2 pseudogene 5                                                |
| 657 | 8078569 | GOLGA4    | 2.1731511  | -3.6653 | 0.478446 | 0.0426167 | golgin A4                                                             |
| 658 | 7929711 | GOLGA7B   | 2.5395152  | -3.1328 | 0.423686 | 0.0199948 | golgin A7 family member B                                             |
| 659 | 8089930 | GOLGB1    | -2.4230693 | -3.3059 | -0.47442 | 0.025543  | golgin B1                                                             |
| 660 | 8162117 | GOLM1     | -2.5349214 | -3.1396 | -1.01659 | 0.0201903 | golgi membrane protein 1                                              |
| 661 | 7923628 | GOLT1A    | -2.8593196 | -2.6434 | -0.90679 | 0.0100327 | golgi transport 1A                                                    |
| 662 | 8004024 | GP1BA     | 3.3877609  | -1.8089 | 0.837937 | 0.0030875 | glycoprotein Ib platelet alpha subunit                                |
| 663 | 8096116 | GPAT3     | 3.1716054  | -2.1525 | 1.149704 | 0.005022  | glycerol-3-phosphate acyltransferase 3                                |
| 664 | 8141466 | GPC2      | 2.1614738  | -3.6817 | 0.454126 | 0.0436262 | glypican 2                                                            |
| 665 | 8078386 | GPD1L     | -2.5301929 | -3.1467 | -1.0059  | 0.0203934 | glycerol-3-phosphate dehydrogenase 1-like                             |
| 666 | 7966321 | GPN3      | -3.3989285 | -1.7911 | -0.85917 | 0.0030105 | GPN-loop GTPase 3                                                     |
| 667 | 8083839 | GPR160    | -3.6623046 | -1.3716 | -1.69345 | 0.0016552 | G protein-coupled receptor 160                                        |
| 668 | 8045075 | GPR17     | 2.2442269  | -3.565  | 0.462382 | 0.036919  | G protein-coupled receptor 17                                         |
| 669 | 8091503 | GPR171    | 2.6273498  | -3.0002 | 1.089535 | 0.0165833 | G protein-coupled receptor 171                                        |
| 670 | 7972548 | GPR18     | 3.1631349  | -2.1659 | 1.391451 | 0.0051181 | G protein-coupled receptor 18                                         |
| 671 | 7972557 | GPR183    | 2.727913   | -2.8466 | 1.1821   | 0.0133558 | G protein-coupled receptor 183                                        |
| 672 | 8045336 | GPR39     | -3.1736394 | -2.1493 | -5.26091 | 0.0049992 | G protein-coupled receptor 39                                         |
| 673 | 8121454 | GPR6      | 2.1285787  | -3.7274 | 0.444991 | 0.0465883 | G protein-coupled receptor 6                                          |
| 674 | 7903694 | GPR61     | 2.4463937  | -3.2715 | 0.554507 | 0.0243276 | G protein-coupled receptor 61                                         |
| 675 | 7954065 | GPRC5A    | -2.474435  | -3.2299 | -1.57422 | 0.0229381 | G protein-coupled receptor class C group 5 member A                   |
| 676 | 7999909 | GPRC5B    | 3.0252861  | -2.3837 | 1.314557 | 0.0069583 | G protein-coupled receptor class C group 5 member B                   |
| 677 | 8009639 | GPRC5C    | -3.5420865 | -1.563  | -3.65416 | 0.002176  | G protein-coupled receptor class C group 5 member C                   |
| 678 | 8125373 | GPSM3     | 2.2734113  | -3.5233 | 0.707632 | 0.0347891 | G-protein signaling modulator 3                                       |
| 679 | 8179987 | GPSM3     | 2.2734113  | -3.5233 | 0.707632 | 0.0347891 | G-protein signaling modulator 3                                       |
| 680 | 8178790 | GPSM3     | 2.1448676  | -3.7048 | 0.672477 | 0.0450994 | G-protein signaling modulator 3                                       |
| 681 | 7901460 | GPX7      | 2.1370098  | -3.7158 | 1.249519 | 0.0458122 | glutathione peroxidase 7                                              |
| 682 | 7955578 | GRASP     | 2.2789305  | -3.5154 | 0.4433   | 0.0343992 | general receptor for phosphoinositides 1 associated scaffold protein  |
| 683 | 8040292 | GREB1     | -2.2430916 | -3.5666 | -2.41632 | 0.0370042 | growth regulation by estrogen in breast cancer 1                      |
| 684 | 8020384 | GREB1L    | -2.7502108 | -2.8123 | -2.14826 | 0.0127261 | growth regulation by estrogen in breast cancer 1 like                 |
| 685 | 8040190 | GRHL1     | 2.1966244  | -3.6324 | 1.272199 | 0.0406516 | grainyhead like transcription factor 1                                |
| 686 | 7914974 | GRIK3     | -2.134794  | -3.7188 | -1.48494 | 0.046015  | glutamate ionotropic receptor kainate type subunit 3                  |
| 687 | 7950921 | GRM5      | 2.1034996  | -3.7621 | 0.410635 | 0.0489682 | glutamate metabotropic receptor 5                                     |
| 688 | 7976571 | GSKIP     | -2.5858206 | -3.0631 | -0.74388 | 0.0181213 | GSK3B interacting protein                                             |
| 689 | 8096688 | GSTCD     | -2.6657582 | -2.9417 | -0.67545 | 0.0152717 | glutathione S-transferase C-terminal domain containing                |
| 690 | 8128890 | GSTM2P1   | 2.3868358  | -3.3591 | 0.657902 | 0.027544  | glutathione S-transferase mu 2 pseudogene 1                           |
| 691 | 7918379 | GSTM3     | -4.1670133 | -0.5759 | -2.51129 | 0.0005229 | glutathione S-transferase mu 3                                        |
| 692 | 7903742 | GSTM4     | -2.7996977 | -2.7359 | -0.91616 | 0.0114283 | glutathione S-transferase mu 4                                        |
| 693 | 7930311 | GSTO2     | -3.0245181 | -2.3849 | -1.26609 | 0.0069702 | glutathione S-transferase omega 2                                     |
| 694 | 7989315 | GTF2A2    | -2.3245343 | -3.4497 | -0.48195 | 0.0313291 | general transcription factor IIA subunit 2                            |
| 695 | 8081953 | GTF2E1    | -2.5447695 | -3.1249 | -0.6694  | 0.0197734 | general transcription factor IIE subunit 1                            |
| 696 | 7963817 | GTSF1     | 2.2816811  | -3.5115 | 1.956088 | 0.0342065 | gametocyte specific factor 1                                          |
| 697 | 7946275 | GVINP1    | 2.5749039  | -3.0795 | 1.263811 | 0.0185474 | GTPase, very large interferon inducible pseudogene 1                  |
| 698 | 8023977 | GZMM      | 2.485538   | -3.2134 | 0.444249 | 0.0224087 | granzyme M                                                            |
| 699 | 8170994 | H2AFB1/// | 2.4876126  | -3.2103 | 0.496369 | 0.0223111 | H2A histone family member B1///H2A histone family member B2///t       |
| 700 | 8176249 | H2AFB1/// | 2.4876126  | -3.2103 | 0.496369 | 0.0223111 | H2A histone family member B1///H2A histone family member B2///t       |
| 701 | 8139421 | H2AFV     | -2.5858702 | -3.063  | -0.547   | 0.0181194 | H2A histone family member V                                           |
| 702 | 8051799 | HAO       | 2.2356804  | -3.5771 | 1.093582 | 0.0375651 | 3-hydroxyanthranilate 3,4-dioxygenase                                 |
| 703 | 8090091 | HACD2///t | -2.5587319 | -3.1039 | -0.62759 | 0.0191961 | 3-hydroxyacyl-CoA dehydratase 2///3-hydroxyacyl-CoA dehydratase       |
| 704 | 8103745 | HAND2     | 2.463815   | -3.2457 | 0.465462 | 0.0234553 | heart and neural crest derivatives expressed 2                        |
| 705 | 7946061 | HBE1      | -2.2941637 | -3.4935 | -1.09772 | 0.0333441 | hemoglobin subunit epsilon 1                                          |
| 706 | 8114572 | HBEGF     | 2.1128733  | -3.7492 | 0.426363 | 0.0480661 | heparin binding EGF like growth factor                                |
| 707 | 8129706 | HBS1L     | -2.2366155 | -3.5758 | -0.68549 | 0.0374939 | HBS1 like translational GTPase                                        |
| 708 | 8117809 | HCG9      | -2.1396027 | -3.7122 | -0.5372  | 0.0455759 | HLA complex group 9 (non-protein coding)                              |
| 709 | 8177740 | HCG9      | -2.1396027 | -3.7122 | -0.5372  | 0.0455759 | HLA complex group 9 (non-protein coding)                              |
| 710 | 7899643 | HCRTR1    | 2.3220629  | -3.4533 | 0.550573 | 0.0314888 | hypocretin receptor 1                                                 |
| 711 | 7944911 | HEPN1     | -2.3219404 | -3.4535 | -0.74342 | 0.0314967 | hepatocellular carcinoma, down-regulated 1                            |
| 712 | 8007745 | HEXIM1    | -3.8381318 | -1.0926 | -1.02225 | 0.0011083 | hexamethylene bisacetamide inducible 1                                |
| 713 | 8089851 | HGD       | -2.3087784 | -3.4725 | -2.90306 | 0.0323599 | homogentisate 1,2-dioxygenase                                         |
| 714 | 8093278 | HGD       | -2.3087784 | -3.4725 | -2.90306 | 0.0323599 | homogentisate 1,2-dioxygenase                                         |
| 715 | 7909510 | HHAT      | -2.260664  | -3.5416 | -0.89552 | 0.0357051 | hedghog acyltransferase                                               |
| 716 | 8161147 | HINT2     | -2.1923141 | -3.6384 | -0.65556 | 0.0410061 | histidine triad nucleotide binding protein 2                          |
| 717 | 8121886 | HINT3     | -2.2284705 | -3.5874 | -0.49189 | 0.0381181 | histidine triad nucleotide binding protein 3                          |
| 718 | 7959500 | HIP1R     | 2.2909802  | -3.4981 | 0.617983 | 0.0335621 | huntingtin interacting protein 1 related                              |
| 719 | 8000748 | HIRIP3    | -2.461578  | -3.249  | -0.78558 | 0.0235657 | HIRA interacting protein 3                                            |
| 720 | 8117334 | HIST1H4A  | -2.1517839 | -3.6952 | -1.60788 | 0.0444804 | histone cluster 1, H4a                                                |
| 721 | 7919584 | HIST2H2BF | -3.3499534 | -1.8691 | -1.23523 | 0.0033628 | histone cluster 2, H2bf///histone cluster 2, H2ba (pseudogene)        |
| 722 | 7919606 | HIST2H2BF | -3.7084192 | -1.2983 | -1.29188 | 0.00149   | histone cluster 2, H2bf///histone cluster 2, H2ba (pseudogene)///hist |
| 723 | 8180093 | HLA-DOA   | 2.8106911  | -2.7189 | 0.861158 | 0.0111577 | major histocompatibility complex, class II, DO alpha                  |
| 724 | 8125545 | HLA-DOA   | 2.1370224  | -3.7157 | 0.883404 | 0.045811  | major histocompatibility complex, class II, DO alpha                  |
| 725 | 8125470 | HLA-DOB   | 2.3928041  | -3.3503 | 1.1888   | 0.0272046 | major histocompatibility complex, class II, DO beta                   |
| 726 | 8178833 | HLA-DOB   | 2.3928041  | -3.3503 | 1.1888   | 0.0272046 | major histocompatibility complex, class II, DO beta                   |
| 727 | 7909890 | HLX       | 2.5528398  | -3.1127 | 0.465953 | 0.0194378 | H2.0 like homeobox                                                    |
| 728 | 7931181 | HMX3      | 2.7979258  | -2.7387 | 0.538724 | 0.0114725 | H6 family homeobox 3                                                  |

|     |         |             |            |         |          |           |                                                                       |
|-----|---------|-------------|------------|---------|----------|-----------|-----------------------------------------------------------------------|
| 729 | 7959234 | HNF1A       | 2.5473147  | -3.121  | 0.472882 | 0.0196669 | HNF1 homeobox A                                                       |
| 730 | 8110450 | HNRNPAB     | -2.1694006 | -3.6706 | -0.56416 | 0.0429386 | heterogeneous nuclear ribonucleoprotein A/B                           |
| 731 | 8047059 | HNRNPCL     | -2.4242418 | -3.3042 | -0.41018 | 0.0254806 | heterogeneous nuclear ribonucleoprotein C-like 1///heterogeneous 1    |
| 732 | 8162047 | HNRNPK      | -2.2223587 | -3.596  | -0.32292 | 0.0385928 | heterogeneous nuclear ribonucleoprotein K                             |
| 733 | 7901765 | HOOK1       | -2.3686614 | -3.3856 | -0.89697 | 0.0286018 | hook microtubule tethering protein 1                                  |
| 734 | 8034521 | HOOK2       | -2.4543329 | -3.2597 | -0.55146 | 0.0239264 | hook microtubule tethering protein 2                                  |
| 735 | 8146243 | HOOK3       | 2.4859393  | -3.2128 | 0.578836 | 0.0223898 | hook microtubule tethering protein 3                                  |
| 736 | 7919787 | HORMAD1     | 2.7081651  | -2.8769 | 2.459273 | 0.0139382 | HORMA domain containing 1                                             |
| 737 | 8016438 | HOXB2       | -3.5051281 | -1.6219 | -1.58772 | 0.0023665 | homeobox B2                                                           |
| 738 | 8016444 | HOXB3       | -5.7548945 | 1.7227  | -1.4743  | 0.0000151 | homeobox B3                                                           |
| 739 | 8016452 | HOXB4       | -2.2537836 | -3.5514 | -0.51179 | 0.0362087 | homeobox B4                                                           |
| 740 | 8016457 | HOXB5       | -2.3162042 | -3.4618 | -1.4023  | 0.0318703 | homeobox B5                                                           |
| 741 | 8016463 | HOXB6       | -2.6858803 | -2.911  | -1.78962 | 0.0146245 | homeobox B6                                                           |
| 742 | 7955855 | HOXC11      | -2.5320121 | -3.144  | -1.81193 | 0.020315  | homeobox C11                                                          |
| 743 | 7955887 | HOXC5       | -2.9295429 | -2.5339 | -1.21201 | 0.0085986 | homeobox C5                                                           |
| 744 | 7955873 | HOXC6///H   | -2.8156655 | -2.7112 | -1.24719 | 0.0110373 | homeobox C6///homeobox C4                                             |
| 745 | 8101780 | HPGDS       | -2.1214761 | -3.7373 | -1.04166 | 0.0472514 | hematopoietic prostaglandin D synthase                                |
| 746 | 7929988 | HPS6        | -2.4092961 | -3.3261 | -0.59738 | 0.0262871 | HPS6, biogenesis of lysosomal organelles complex 2 subunit 3          |
| 747 | 8067394 | HRH3        | 2.0948631  | -3.774  | 0.610223 | 0.0498129 | histamine receptor H3                                                 |
| 748 | 7969665 | HS6ST3      | -2.7544241 | -2.8058 | -1.64422 | 0.0126103 | heparan sulfate 6-O-sulfotransferase 3                                |
| 749 | 8072143 | HSCB        | -2.2076736 | -3.6168 | -0.4816  | 0.0397556 | HscB mitochondrial iron-sulfur cluster cochaperone                    |
| 750 | 8047228 | HSPE1-MC    | -2.5837721 | -3.0662 | -0.63543 | 0.0182005 | HSPE1-MOB4 readthrough///MOB family member 4, phoecin                 |
| 751 | 8120983 | HTR1E       | -3.2125807 | -2.0875 | -1.50062 | 0.0045813 | 5-hydroxytryptamine receptor 1E                                       |
| 752 | 8068180 | HUNK        | 2.3195432  | -3.457  | 0.604855 | 0.0316523 | hormonally up-regulated Neu-associated kinase                         |
| 753 | 7985192 | HYKK        | -2.6483536 | -2.9683 | -0.73927 | 0.0158533 | hydroxylysine kinase                                                  |
| 754 | 8138202 | ICA1        | -2.733631  | -2.8378 | -0.7691  | 0.0131915 | islet cell autoantigen 1                                              |
| 755 | 7989347 | ICE2        | -2.9208691 | -2.5475 | -0.70186 | 0.0087644 | interactor of little elongation complex ELL subunit 2                 |
| 756 | 8070720 | ICOSLG      | 2.77871    | -2.7684 | 1.008337 | 0.0119624 | inducible T-cell costimulator ligand                                  |
| 757 | 7931748 | IDI2        | 3.1546087  | -2.1794 | 1.016915 | 0.0052166 | isopentenyl-diphosphate delta isomerase 2                             |
| 758 | 8023175 | IER3IP1     | -2.0980306 | -3.7696 | -0.61546 | 0.0495016 | immediate early response 3 interacting protein 1                      |
| 759 | 8164554 | IER5L       | 2.153129   | -3.6933 | 0.33705  | 0.0443609 | immediate early response 5 like                                       |
| 760 | 8068238 | IFNAR2      | 2.8866304  | -2.6009 | 0.714856 | 0.0094496 | interferon alpha and beta receptor subunit 2                          |
| 761 | 8160435 | IFNE        | -2.6823106 | -2.9165 | -2.91851 | 0.0147374 | interferon epsilon                                                    |
| 762 | 7998542 | IFT140///IF | -2.1066886 | -3.7577 | -0.67351 | 0.0486596 | intraflagellar transport 140///intraflagellar transport 140           |
| 763 | 7952069 | IFT46       | -2.5794472 | -3.0727 | -0.73727 | 0.0183689 | intraflagellar transport 46                                           |
| 764 | 8091737 | IFT80       | -2.5769496 | -3.0765 | -0.64433 | 0.0184669 | intraflagellar transport 80                                           |
| 765 | 7958620 | IFT81       | -2.9796603 | -2.4554 | -0.84898 | 0.0076982 | intraflagellar transport 81                                           |
| 766 | 7967933 | IFT88       | -3.1600886 | -2.1708 | -0.84152 | 0.0051531 | intraflagellar transport 88                                           |
| 767 | 7973900 | IGBP1P1     | -2.1959587 | -3.6333 | -0.79032 | 0.0407062 | immunoglobulin (CD79A) binding protein 1 pseudogene 1                 |
| 768 | 7986359 | IGF1R       | -2.6982433 | -2.8921 | -1.49585 | 0.0142399 | insulin like growth factor 1 receptor                                 |
| 769 | 7986383 | IGF1R       | -2.53229   | -3.1436 | -1.34899 | 0.0203031 | insulin like growth factor 1 receptor                                 |
| 770 | 8036136 | IGFLR1      | 2.2705501  | -3.5274 | 0.5312   | 0.0349928 | IGF like family receptor 1                                            |
| 771 | 7981720 | IGHA1///SI  | 2.1072877  | -3.7569 | 1.639721 | 0.0486018 | immunoglobulin heavy constant alpha 1///single-chain Fv fragment/     |
| 772 | 7981601 | IGHM///IG   | 2.8491178  | -2.6593 | 1.982582 | 0.0102593 | immunoglobulin heavy constant mu///immunoglobulin heavy consta        |
| 773 | 7981728 | IGHM///IG   | 2.2038347  | -3.6222 | 1.807653 | 0.0400649 | immunoglobulin heavy constant mu///immunoglobulin heavy variab        |
| 774 | 8001104 | IGHV3-48/   | 2.1244429  | -3.7332 | 1.610462 | 0.0469734 | immunoglobulin heavy variable 3-48///immunoglobulin heavy variat      |
| 775 | 8043449 | IGK///IGKC  | 2.8370841  | -2.678  | 2.013162 | 0.0105329 | immunoglobulin kappa locus///immunoglobulin kappa constant            |
| 776 | 8043360 | IGK///IGKC  | 2.7815061  | -2.7641 | 2.043072 | 0.0118899 | immunoglobulin kappa locus///immunoglobulin kappa constant            |
| 777 | 8043438 | IGKC        | 3.5157713  | -1.6049 | 1.759678 | 0.00231   | immunoglobulin kappa constant                                         |
| 778 | 8053713 | IGKC        | 3.515689   | -1.605  | 1.790361 | 0.0023104 | immunoglobulin kappa constant                                         |
| 779 | 8043433 | IGKC        | 3.4858407  | -1.6526 | 1.756279 | 0.0024724 | immunoglobulin kappa constant                                         |
| 780 | 8043474 | IGKC        | 2.7170637  | -2.8633 | 1.722549 | 0.0136728 | immunoglobulin kappa constant                                         |
| 781 | 8043465 | IGKC        | 2.5359947  | -3.138  | 1.98651  | 0.0201445 | immunoglobulin kappa constant                                         |
| 782 | 8043459 | IGKC        | 2.3755434  | -3.3756 | 1.962586 | 0.0281968 | immunoglobulin kappa constant                                         |
| 783 | 8043484 | IGKC        | 2.129976   | -3.7255 | 1.671009 | 0.0464589 | immunoglobulin kappa constant                                         |
| 784 | 8053735 | IGKC        | 2.129976   | -3.7255 | 1.671009 | 0.0464589 | immunoglobulin kappa constant                                         |
| 785 | 8161563 | IGKC        | 2.129976   | -3.7255 | 1.671009 | 0.0464589 | immunoglobulin kappa constant                                         |
| 786 | 8043480 | IGKC        | 2.1040594  | -3.7613 | 1.663472 | 0.0489139 | immunoglobulin kappa constant                                         |
| 787 | 8074909 | IGLL1       | 2.2461436  | -3.5623 | 0.424602 | 0.0367755 | immunoglobulin lambda like polypeptide 1                              |
| 788 | 8132819 | IKZF1       | 2.1399624  | -3.7117 | 1.036939 | 0.0455432 | IKAROS family zinc finger 1                                           |
| 789 | 8014891 | IKZF3       | 2.7852297  | -2.7583 | 1.633519 | 0.011794  | IKAROS family zinc finger 3                                           |
| 790 | 7944152 | IL10RA      | 2.2151043  | -3.6063 | 1.050642 | 0.0391633 | interleukin 10 receptor subunit alpha                                 |
| 791 | 8068254 | IL10RB///IL | 3.01188    | -2.4048 | 0.533583 | 0.0071683 | interleukin 10 receptor subunit beta///interleukin 10 receptor subuni |
| 792 | 7985364 | IL16        | 2.9705982  | -2.4696 | 1.534915 | 0.007854  | interleukin 16                                                        |
| 793 | 8080562 | IL17RB      | -2.5236246 | -3.1566 | -1.27143 | 0.0206787 | interleukin 17 receptor B                                             |
| 794 | 8044035 | IL18R1///IL | 2.2821772  | -3.5108 | 0.920817 | 0.0341718 | interleukin 18 receptor 1///interleukin 18 receptor 1                 |
| 795 | 8044049 | IL18RAP     | 2.325574   | -3.4482 | 0.855668 | 0.0312622 | interleukin 18 receptor accessory protein                             |
| 796 | 7909261 | IL20        | -2.5145124 | -3.1702 | -1.95504 | 0.0210808 | interleukin 20                                                        |
| 797 | 7902189 | IL23R       | -3.5617416 | -1.5317 | -1.29693 | 0.0020809 | interleukin 23 receptor                                               |
| 798 | 8000567 | IL27        | -2.4195351 | -3.3111 | -0.62107 | 0.025732  | interleukin 27                                                        |
| 799 | 8026272 | IL27RA      | 2.7309789  | -2.8419 | 1.237775 | 0.0132675 | interleukin 27 receptor subunit alpha                                 |
| 800 | 8173444 | IL2RG       | 2.3771884  | -3.3732 | 1.229016 | 0.0281008 | interleukin 2 receptor subunit gamma                                  |
| 801 | 8085062 | IL5RA       | 2.2429065  | -3.5669 | 0.657064 | 0.0370181 | interleukin 5 receptor subunit alpha                                  |

|     |                   |            |         |          |                                                                               |
|-----|-------------------|------------|---------|----------|-------------------------------------------------------------------------------|
| 802 | 8089970 ILDR1     | -3.2620589 | -2.0089 | -1.01849 | 0.0040994 immunoglobulin like domain containing receptor 1                    |
| 803 | 8020183 IMPA2     | 2.2628427  | -3.5384 | 1.413963 | 0.035547 inositol monophosphatase 2                                           |
| 804 | 7956423 INHBC     | 2.3733914  | -3.3787 | 0.556682 | 0.0283229 inhibin beta C subunit                                              |
| 805 | 8163428 INIP      | -2.495309  | -3.1989 | -0.63074 | 0.0219524 INTS3 and NABP interacting protein                                  |
| 806 | 8022902 INO80C    | -2.2908204 | -3.4984 | -0.63552 | 0.0335731 INO80 complex subunit C                                             |
| 807 | 8072436 INPP5J    | -3.1690377 | -2.1566 | -1.76689 | 0.0050509 inositol polyphosphate-5-phosphatase J                              |
| 808 | 8044766 INSIG2    | -2.6730895 | -2.9306 | -0.76877 | 0.0150328 insulin induced gene 2                                              |
| 809 | 8144894 INTS10    | 2.138738   | -3.7134 | 0.556535 | 0.0456545 integrator complex subunit 10                                       |
| 810 | 8170027 INTS6L    | 3.3294154  | -1.9018 | 1.671102 | 0.0035223 integrator complex subunit 6 like                                   |
| 811 | 8093258 IQCG      | -2.6016093 | -3.0392 | -0.81382 | 0.0175213 IQ motif containing G                                               |
| 812 | 7984380 IQCH      | -3.4281652 | -1.7445 | -1.02203 | 0.0028177 IQ motif containing H                                               |
| 813 | 7993713 IQCK      | -2.1289398 | -3.7269 | -0.62796 | 0.0465548 IQ motif containing K                                               |
| 814 | 8085412 IQSEC1    | 2.1821251  | -3.6528 | 0.575201 | 0.0418554 IQ motif and Sec7 domain 1                                          |
| 815 | 8037723 IRF2BP1   | -2.8750812 | -2.6189 | -0.43716 | 0.0096921 interferon regulatory factor 2 binding protein 1                    |
| 816 | 8116559 IRF4      | 2.8710005  | -2.6253 | 2.191224 | 0.0097792 interferon regulatory factor 4                                      |
| 817 | 7997712 IRF8      | 2.1564127  | -3.6887 | 1.070653 | 0.0440705 interferon regulatory factor 8                                      |
| 818 | 8174444 IRS4      | 2.8372485  | -2.6777 | 3.26561  | 0.0105291 insulin receptor substrate 4                                        |
| 819 | 8104314 IRX1      | 2.5988004  | -3.0435 | 2.059331 | 0.0176267 iroquois homeobox 1                                                 |
| 820 | 8001147 ISY1-RAB4 | -2.3588955 | -3.3999 | -0.61485 | 0.0291856 ISY1-RAB43 readthrough///RAB43, member RAS oncogene family          |
| 821 | 8016044 ITGA2B    | 2.1167891  | -3.7438 | 0.412053 | 0.0476937 integrin subunit alpha 2b                                           |
| 822 | 8046695 ITGA4     | 2.202183   | -3.6245 | 0.974451 | 0.0401986 integrin subunit alpha 4                                            |
| 823 | 8078619 ITGA9     | 2.1575042  | -3.6872 | 0.867188 | 0.0439743 integrin subunit alpha 9                                            |
| 824 | 7995128 ITGAX     | 2.9712947  | -2.4685 | 1.083381 | 0.0078419 integrin subunit alpha X                                            |
| 825 | 8090162 ITGB5     | -2.5235049 | -3.1567 | -0.86313 | 0.020684 integrin subunit beta 5                                              |
| 826 | 7926061 ITIH2     | 2.8060987  | -2.726  | 0.727504 | 0.01127 inter-alpha-trypsin inhibitor heavy chain 2                           |
| 827 | 8109507 ITK       | 2.452237   | -3.2628 | 1.47541  | 0.0240317 IL2 inducible T-cell kinase                                         |
| 828 | 8060611 ITPA      | -2.1417694 | -3.7091 | -0.49188 | 0.0453792 inosine triphosphatase                                              |
| 829 | 7993622 ITPRIPL2  | -2.2577915 | -3.5457 | -0.65558 | 0.0359145 inositol 1,4,5-trisphosphate receptor interacting protein like 2    |
| 830 | 8038532 IZUMO2    | 2.2784398  | -3.5161 | 0.597573 | 0.0344337 IZUMO family member 2                                               |
| 831 | 7952022 JAML      | 2.5438404  | -3.1263 | 1.261285 | 0.0198123 junction adhesion molecule like                                     |
| 832 | 7974725 JKAMP     | -2.5177884 | -3.1653 | -0.43191 | 0.0209354 JNK1/MAPK8-associated membrane protein                              |
| 833 | 7978093 JPH4      | 2.2090966  | -3.6148 | 0.451249 | 0.0396416 junctophilin 4                                                      |
| 834 | 8153328 JRK       | 2.8147066  | -2.7127 | 0.432671 | 0.0110604 Jrk helix-turn-helix protein                                        |
| 835 | 8035445 JUND      | -2.2517659 | -3.5543 | -0.43799 | 0.0363576 JunD proto-oncogene, AP-1 transcription factor subunit              |
| 836 | 8015412 JUP       | -2.7694379 | -2.7827 | -0.82711 | 0.0122059 junction plakoglobin                                                |
| 837 | 8117189 KAAG1     | 2.483073   | -3.2171 | -0.84719 | 0.0225252 kidney associated antigen 1                                         |
| 838 | 8078227 KAT2B     | 2.4791491  | -3.2229 | 0.915097 | 0.0227119 lysine acetyltransferase 2B                                         |
| 839 | 7987180 KATNBL1P  | -2.7940342 | -2.7447 | -0.36701 | 0.0115701 katanin regulatory subunit B1 like 1 pseudogene 6///katanin regulat |
| 840 | 7918457 KCNA3     | 2.7147841  | -2.8668 | 1.621163 | 0.0137403 potassium voltage-gated channel subfamily A member 3                |
| 841 | 8146908 KCNB2     | 2.4328924  | -3.2914 | 0.503119 | 0.0250244 potassium voltage-gated channel subfamily B member 2                |
| 842 | 8135705 KCND2     | -2.7826368 | -2.7623 | -1.49513 | 0.0118607 potassium voltage-gated channel subfamily D member 2                |
| 843 | 8051785 KCNG3     | 2.1030299  | -3.7627 | 0.545224 | 0.0490138 potassium voltage-gated channel modifier subfamily G member 3       |
| 844 | 7924071 KCNH1     | -2.4800597 | -3.2215 | -2.35087 | 0.0226684 potassium voltage-gated channel subfamily H member 1                |
| 845 | 8126173 KCNK16    | -2.2736788 | -3.5229 | -0.65013 | 0.0347701 potassium two pore domain channel subfamily K member 16             |
| 846 | 8126153 KCNK5     | 2.8268969  | -2.6938 | 2.433394 | 0.01077 potassium two pore domain channel subfamily K member 5                |
| 847 | 8115756 KCNMB1    | 2.1361152  | -3.717  | 0.887824 | 0.045894 potassium calcium-activated channel subfamily M regulatory beta su   |
| 848 | 8084002 KCNMB2    | 3.5556295  | -1.5414 | 0.834789 | 0.00211 potassium calcium-activated channel subfamily M regulatory beta su    |
| 849 | 7920552 KCNN3     | 2.1965551  | -3.6325 | 0.685528 | 0.0406573 potassium calcium-activated channel subfamily N member 3            |
| 850 | 8152946 KCNQ3     | 2.5107672  | -3.1758 | 0.382596 | 0.0212482 potassium voltage-gated channel subfamily Q member 3                |
| 851 | 8040458 KCNS3     | -3.1844545 | -2.1321 | -1.24913 | 0.0048795 potassium voltage-gated channel modifier subfamily S member 3       |
| 852 | 8022646 KCTD1     | -2.1235522 | -3.7344 | -0.64763 | 0.0470567 potassium channel tetramerization domain containing 1               |
| 853 | 8004331 KCTD11/// | 2.8988845  | -2.5818 | 1.376237 | 0.0091986 potassium channel tetramerization domain containing 11///ArfGAP v   |
| 854 | 8009737 KCTD2     | -2.3272893 | -3.4458 | -0.59616 | 0.031152 potassium channel tetramerization domain containing 2                |
| 855 | 7909745 KCTD3     | -3.6996393 | -1.3122 | -1.21458 | 0.0015202 potassium channel tetramerization domain containing 3               |
| 856 | 7967175 KDM2B     | 2.2898554  | -3.4997 | 0.423922 | 0.0336394 lysine demethylase 2B                                               |
| 857 | 8024909 KDM4B     | -2.690392  | -2.9041 | -0.96845 | 0.014483 lysine demethylase 4B                                                |
| 858 | 7994269 KDM8      | 2.4712769  | -3.2346 | 0.326808 | 0.0230908 lysine demethylase 8                                                |
| 859 | 8120675 KHDC3L    | 2.2795009  | -3.5146 | 0.62393  | 0.0343592 KH domain containing 3 like, subcortical maternal complex member    |
| 860 | 8148448 KHDRBS3   | 2.3750593  | -3.3763 | 1.368558 | 0.0282252 KH RNA binding domain containing, signal transduction associated :  |
| 861 | 8138686 KIAA0087  | -2.1278066 | -3.7285 | -3.17671 | 0.04666 KIAA0087                                                              |
| 862 | 7989647 KIAA0101  | -2.4179668 | -3.3134 | -1.10861 | 0.0258163 KIAA0101                                                            |
| 863 | 7971486 KIAA0226L | 2.397906   | -3.3429 | 1.164016 | 0.0269176 KIAA0226 like                                                       |
| 864 | 8093961 KIAA0232  | -2.21507   | -3.6064 | -0.60153 | 0.039166 KIAA0232                                                             |
| 865 | 7973924 KIAA0391  | -2.4939651 | -3.2009 | -0.54349 | 0.0220146 KIAA0391                                                            |
| 866 | 7994308 KIAA0556  | -3.1524447 | -2.1829 | -0.79941 | 0.0052419 KIAA0556                                                            |
| 867 | 8113113 KIAA0825  | -2.3716474 | -3.3813 | -0.65528 | 0.0284254 KIAA0825                                                            |
| 868 | 7899821 KIAA1522  | -2.617558  | -3.015  | -0.80211 | 0.0169344 KIAA1522                                                            |
| 869 | 7907882 KIAA1614  | 2.1951243  | -3.6345 | 0.384238 | 0.0407747 KIAA1614                                                            |
| 870 | 8066231 KIAA1755  | 2.5522165  | -3.1137 | 1.378226 | 0.0194635 KIAA1755                                                            |
| 871 | 8163548 KIF12     | -2.7512519 | -2.8107 | -1.98664 | 0.0126974 kinesin family member 12                                            |
| 872 | 8065089 KIF16B    | -4.7685037 | 0.3395  | -1.11113 | 0.0001335 kinesin family member 16B                                           |
| 873 | 7923233 KIF21B    | 3.2438261  | -2.0379 | 1.216436 | 0.004271 kinesin family member 21B                                            |
| 874 | 8123437 KIF25     | 2.6525522  | -2.9619 | 0.37478  | 0.0157111 kinesin family member 25                                            |

|     |         |           |            |         |          |           |                                                                    |
|-----|---------|-----------|------------|---------|----------|-----------|--------------------------------------------------------------------|
| 875 | 7965322 | KITLG     | -2.5706559 | -3.0859 | -1.33672 | 0.0187158 | KIT ligand                                                         |
| 876 | 7968556 | KL        | 2.3330395  | -3.4374 | 0.389444 | 0.0307854 | klotho                                                             |
| 877 | 7972003 | KLF12     | 2.2335449  | -3.5802 | 0.617678 | 0.0377281 | Kruppel like factor 12                                             |
| 878 | 7974229 | KLHDC2    | -2.1310413 | -3.724  | -0.57632 | 0.0463604 | kelch domain containing 2                                          |
| 879 | 8074106 | KLHDC7B   | 2.2763324  | -3.5191 | 0.411376 | 0.0345822 | kelch domain containing 7B                                         |
| 880 | 8015456 | KLHL11    | -2.1806148 | -3.6549 | -0.48387 | 0.0419826 | kelch like family member 11                                        |
| 881 | 7923489 | KLHL12    | -2.8709357 | -2.6254 | -0.62221 | 0.0097806 | kelch like family member 12                                        |
| 882 | 7896779 | KLHL17    | 2.2586045  | -3.5445 | 0.374    | 0.0358551 | kelch like family member 17                                        |
| 883 | 8046160 | KLHL41    | -2.5955542 | -3.0484 | -0.76589 | 0.0177492 | kelch like family member 41                                        |
| 884 | 8092392 | KLHL6     | 2.1835608  | -3.6508 | 0.943945 | 0.0417348 | kelch like family member 6                                         |
| 885 | 8038643 | KLK15     | 2.5683929  | -3.0893 | 0.445998 | 0.0188061 | kallikrein related peptidase 15                                    |
| 886 | 7961059 | KLRB1     | 2.3373124  | -3.4312 | 1.290053 | 0.0305155 | killer cell lectin like receptor B1                                |
| 887 | 7953835 | KLRG1     | 2.1594573  | -3.6845 | 1.018282 | 0.0438027 | killer cell lectin like receptor G1                                |
| 888 | 7955637 | KRT18     | -2.5834326 | -3.0667 | -1.29287 | 0.0182137 | keratin 18                                                         |
| 889 | 8154725 | KRT18     | -2.2865045 | -3.5046 | -1.10397 | 0.0338708 | keratin 18                                                         |
| 890 | 8015349 | KRT19     | -4.0547482 | -0.7513 | -1.60343 | 0.0006757 | keratin 19                                                         |
| 891 | 8015095 | KRT28     | -2.3000499 | -3.4851 | -1.19829 | 0.0329444 | keratin 28                                                         |
| 892 | 8015301 | KRT35     | -3.4422198 | -1.7221 | -1.52076 | 0.0027294 | keratin 35                                                         |
| 893 | 7955613 | KRT7      | -2.1998963 | -3.6278 | -0.89388 | 0.0403844 | keratin 7                                                          |
| 894 | 7963567 | KRT8      | -2.8190162 | -2.706  | -1.38937 | 0.0109569 | keratin 8                                                          |
| 895 | 7963333 | KRT80     | -3.2616388 | -2.0096 | -2.17972 | 0.0041033 | keratin 80                                                         |
| 896 | 7938309 | KRT8P41   | -3.0504423 | -2.344  | -0.76691 | 0.0065804 | keratin 8 pseudogene 41                                            |
| 897 | 8069848 | KRTAP6-2  | 2.9504408  | -2.5012 | 0.484019 | 0.0082115 | keratin associated protein 6-2                                     |
| 898 | 8036072 | KRTDAP    | 2.0992886  | -3.7679 | 0.450696 | 0.0493784 | keratinocyte differentiation associated protein                    |
| 899 | 7979351 | KTN1-AS1  | -2.4399451 | -3.281  | -0.72364 | 0.0246581 | KTN1 antisense RNA 1                                               |
| 900 | 8022145 | L3MBTL4   | 2.5443381  | -3.1255 | 1.677955 | 0.0197915 | l(3)mbt-like 4 (Drosophila)                                        |
| 901 | 8092348 | LAMP3     | 3.2393411  | -2.045  | 2.043046 | 0.0043142 | lysosomal associated membrane protein 3                            |
| 902 | 7901856 | LAMTOR5F  | -3.3011076 | -1.9468 | -0.73184 | 0.0037545 | late endosomal/lysosomal adaptor, MAPK and MTOR activator 5 pse    |
| 903 | 8075637 | LARGE1    | -3.12542   | -2.2256 | -0.99067 | 0.0055682 | LARGE xylosyl- and glucuronyltransferase 1                         |
| 904 | 7939620 | LARGE2    | 2.9700648  | -2.4704 | 1.354037 | 0.0078633 | LARGE xylosyl- and glucuronyltransferase 2                         |
| 905 | 7994541 | LAT       | 3.4038466  | -1.7833 | 0.943889 | 0.0029771 | linker for activation of T-cells                                   |
| 906 | 7924603 | LBR       | 2.6281842  | -2.9989 | 0.846315 | 0.0165537 | lamin B receptor                                                   |
| 907 | 7905525 | LCE1B     | 2.1423214  | -3.7084 | 0.726464 | 0.0453293 | late cornified envelope 1B                                         |
| 908 | 7899753 | LCK       | 2.2977887  | -3.4883 | 1.091668 | 0.0330974 | LCK proto-oncogene, Src family tyrosine kinase                     |
| 909 | 7988077 | LCMT2     | -3.5964566 | -1.4764 | -0.69399 | 0.0019229 | leucine carboxyl methyltransferase 2                               |
| 910 | 7938777 | LDHA      | -2.3782899 | -3.3716 | -0.52753 | 0.0280367 | lactate dehydrogenase A                                            |
| 911 | 7961693 | LDHB      | 2.6519066  | -2.9629 | 1.009218 | 0.0157329 | lactate dehydrogenase B                                            |
| 912 | 8083576 | LEKR1     | -2.9950533 | -2.4312 | -1.11477 | 0.0074405 | leucine, glutamate and lysine rich 1                               |
| 913 | 7988838 | LEO1      | -4.6128574 | 0.1071  | -0.72916 | 0.0001897 | LEO1 homolog, Paf1/RNA polymerase II complex component             |
| 914 | 7902074 | LEPROT/// | -2.1593686 | -3.6846 | -0.56159 | 0.0438105 | leptin receptor overlapping transcript///leptin receptor           |
| 915 | 8075956 | LGALS2    | 2.2125098  | -3.61   | 0.726456 | 0.0393692 | galectin 2                                                         |
| 916 | 7910706 | LGALS8    | -2.2199095 | -3.5995 | -0.62542 | 0.0387846 | galectin 8                                                         |
| 917 | 8149685 | LGI3      | -2.4019297 | -3.337  | -0.51006 | 0.0266933 | leucine rich repeat LGI family member 3                            |
| 918 | 8039246 | LILRA4    | 2.2740432  | -3.5224 | 0.992378 | 0.0347442 | leukocyte immunoglobulin like receptor A4                          |
| 919 | 8180196 | LILRA6    | 3.5758633  | -1.5092 | 0.809081 | 0.0020151 | leukocyte immunoglobulin like receptor A6                          |
| 920 | 8017393 | LIMD2     | 2.9499235  | -2.502  | 0.837733 | 0.0082208 | LIM domain containing 2                                            |
| 921 | 8139873 | LINC00174 | -2.3437364 | -3.4219 | -1.0286  | 0.0301139 | long intergenic non-protein coding RNA 174                         |
| 922 | 7898736 | LINC00339 | -2.4714046 | -3.2344 | -0.77697 | 0.0230846 | long intergenic non-protein coding RNA 339                         |
| 923 | 7909561 | LINC00467 | -3.6654655 | -1.3666 | -0.9356  | 0.0016433 | long intergenic non-protein coding RNA 467                         |
| 924 | 8021995 | LINC00470 | -2.654339  | -2.9592 | -3.43031 | 0.015651  | long intergenic non-protein coding RNA 470                         |
| 925 | 8162562 | LINC00476 | 2.5733557  | -3.0819 | 0.528149 | 0.0186086 | long intergenic non-protein coding RNA 476                         |
| 926 | 7961820 | LINC00477 | -2.2938833 | -3.494  | -0.56858 | 0.0333632 | long intergenic non-protein coding RNA 477                         |
| 927 | 8099438 | LINC00504 | -2.7143645 | -2.8674 | -2.14649 | 0.0137528 | long intergenic non-protein coding RNA 504                         |
| 928 | 8101359 | LINC00575 | 2.3733901  | -3.3787 | 0.568335 | 0.028323  | long intergenic non-protein coding RNA 575                         |
| 929 | 7927099 | LINC00839 | 2.5171177  | -3.1663 | 0.52882  | 0.0209651 | long intergenic non-protein coding RNA 839                         |
| 930 | 8026503 | LINC00905 | 2.8261247  | -2.695  | 0.622268 | 0.0107882 | long intergenic non-protein coding RNA 905                         |
| 931 | 8116607 | LINC01011 | -2.1991942 | -3.6288 | -0.53368 | 0.0404416 | long intergenic non-protein coding RNA 1011                        |
| 932 | 8056730 | LINC01124 | -2.1441821 | -3.7058 | -1.27554 | 0.0451612 | long intergenic non-protein coding RNA 1124                        |
| 933 | 8093872 | LINC01587 | 3.2713875  | -1.9941 | 0.767499 | 0.0040143 | long intergenic non-protein coding RNA 1587                        |
| 934 | 8065547 | LINC01597 | 2.930555   | -2.5323 | 0.588969 | 0.0085795 | long intergenic non-protein coding RNA 1597                        |
| 935 | 8092541 | LIPH      | -2.9163072 | -2.5546 | -1.3684  | 0.0088529 | lipase H                                                           |
| 936 | 8053975 | LMAN2L    | -2.1955746 | -3.6339 | -0.55503 | 0.0407377 | lectin, mannose binding 2 like                                     |
| 937 | 8111533 | LMBRD2    | -2.2543648 | -3.5505 | -0.52493 | 0.0361659 | LMBR1 domain containing 2                                          |
| 938 | 8085033 | LMLN      | -2.7567985 | -2.8022 | -0.9411  | 0.0125455 | leishmanolysin like peptidase                                      |
| 939 | 7921936 | LMX1A     | 2.1168514  | -3.7437 | 0.404339 | 0.0476878 | LIM homeobox transcription factor 1 alpha                          |
| 940 | 8157922 | LMX1B     | -2.2424701 | -3.5675 | -1.11611 | 0.037051  | LIM homeobox transcription factor 1 beta                           |
| 941 | 8100362 | LNX1      | -3.0549794 | -2.3369 | -1.08343 | 0.0065143 | ligand of numb-protein X 1                                         |
| 942 | 7970716 | LNX2      | -2.1796655 | -3.6562 | -0.59371 | 0.0420628 | ligand of numb-protein X 2                                         |
| 943 | 8025124 | LOC10003  | -2.4802321 | -3.2213 | -2.85584 | 0.0226602 | uncharacterized LOC100034248///microtubule affinity regulating kin |
| 944 | 8052376 | LOC10012  | -3.0961131 | -2.272  | -1.51582 | 0.0059444 | uncharacterized LOC100129434                                       |
| 945 | 8137962 | LOC10012  | 2.1567951  | -3.6882 | 0.425863 | 0.0440368 | uncharacterized LOC100129484                                       |
| 946 | 8103092 | LOC10012  | 2.1041668  | -3.7612 | 0.518344 | 0.0489035 | uncharacterized LOC100129572                                       |
| 947 | 8127776 | LOC10013  | 2.1010292  | -3.7655 | 0.486263 | 0.0492085 | PRO2122                                                            |

|      |                   |            |         |          |                                                                              |
|------|-------------------|------------|---------|----------|------------------------------------------------------------------------------|
| 948  | 7991047 LOC10013  | -2.8148654 | -2.7125 | -0.98015 | 0.0110566 uncharacterized LOC100131860                                       |
| 949  | 7976554 LOC10013  | 2.7265912  | -2.8486 | 0.764286 | 0.013394 uncharacterized LOC100133207                                        |
| 950  | 7978831 LOC10028  | 2.859497   | -2.6432 | 0.547151 | 0.0100288 uncharacterized LOC100288910                                       |
| 951  | 8117176 LOC10050  | 2.2901367  | -3.4993 | 0.532636 | 0.0336201 putative UPF0607 protein FLJ37424///UPF0607 protein ENSP000003E    |
| 952  | 8088636 LOC10050  | -2.1347153 | -3.7189 | -0.80777 | 0.0460222 HHSL751                                                            |
| 953  | 8100768 LOC10192  | -2.2500897 | -3.5566 | -5.49773 | 0.0364817 UDP-glucuronosyltransferase 2B10-like///UDP glucuronosyltransferas |
| 954  | 8086024 LOC10537  | 2.205402   | -3.62   | 0.47162  | 0.0399384 uncharacterized LOC105377021                                       |
| 955  | 8148982 LOC10537  | 2.1082041  | -3.7556 | 0.757257 | 0.0485135 uncharacterized LOC105377774                                       |
| 956  | 8161476 LOC10798  | 2.2957536  | -3.4913 | 0.485612 | 0.0332357 uncharacterized LOC107987020///uncharacterized LOC107987020        |
| 957  | 7909418 LOC14869  | -3.8700625 | -1.0421 | -1.09164 | 0.0010303 uncharacterized LOC148696                                          |
| 958  | 8089464 LOC15176  | 2.1949954  | -3.6347 | 1.754495 | 0.0407853 putative uncharacterized protein LOC151760                         |
| 959  | 8012893 LOC40057  | 2.2010857  | -3.6261 | 0.449317 | 0.0402876 uncharacterized LOC400576                                          |
| 960  | 8147721 LOC40147  | 3.4693087  | -1.679  | 0.579339 | 0.0025669 myosin IC heavy chain                                              |
| 961  | 7991577 LOC44031  | 2.3331615  | -3.4373 | 0.590745 | 0.0307776 protein enabled homolog                                            |
| 962  | 8130807 LOC44117  | 2.1835765  | -3.6507 | 3.145426 | 0.0417334 uncharacterized LOC441178                                          |
| 963  | 8130980 LOC44117  | 2.1835765  | -3.6507 | 3.145426 | 0.0417334 uncharacterized LOC441178                                          |
| 964  | 7953844 LOC64284  | 2.2274682  | -3.5888 | 0.699177 | 0.0381956 DEAD/H (Asp-Glu-Ala-Asp/His) box polypeptide 11-like///DEAD/H-b    |
| 965  | 7954655 LOC64284  | 2.2059259  | -3.6193 | 0.715485 | 0.0398961 DEAD/H (Asp-Glu-Ala-Asp/His) box polypeptide 11-like///DEAD/H-b    |
| 966  | 7961031 LOC64284  | 2.2059259  | -3.6193 | 0.715485 | 0.0398961 DEAD/H (Asp-Glu-Ala-Asp/His) box polypeptide 11-like///DEAD/H-b    |
| 967  | 8016261 LOC64417  | 2.4935043  | -3.2015 | 0.628509 | 0.022036 mitogen-activated protein kinase 8 interacting protein 1 pseudogen  |
| 968  | 8007848 LOC64417  | 2.4550368  | -3.2587 | 0.643884 | 0.0238911 mitogen-activated protein kinase 8 interacting protein 1 pseudogen |
| 969  | 7912280 LOC64501  | -2.1502933 | -3.6973 | -1.54005 | 0.0446132 uncharacterized LOC645010                                          |
| 970  | 8060790 LOC72828  | 2.1127721  | -3.7493 | 0.480835 | 0.0480757 uncharacterized LOC728283                                          |
| 971  | 7993776 LOC81691  | -2.2206707 | -3.5984 | -0.8964  | 0.0387249 exonuclease NEF-sp                                                 |
| 972  | 8040340 LPIN1     | 2.4948181  | -3.1996 | 1.145982 | 0.0219751 lipin 1                                                            |
| 973  | 8088642 LRIG1     | -2.4903349 | -3.2063 | -1.02273 | 0.0221836 leucine rich repeats and immunoglobulin like domains 1             |
| 974  | 7961339 LRP6      | 2.9034477  | -2.5747 | 0.868165 | 0.0091068 LDL receptor related protein 6                                     |
| 975  | 8092009 LRRC34    | 2.3824235  | -3.3655 | 0.915759 | 0.0277974 leucine rich repeat containing 34                                  |
| 976  | 8008040 LRRC46    | -2.9476207 | -2.5056 | -1.36966 | 0.0082627 leucine rich repeat containing 46                                  |
| 977  | 7984569 LRRC49    | -2.8089172 | -2.7217 | -1.00647 | 0.0112009 leucine rich repeat containing 49                                  |
| 978  | 8152962 LRRC6     | -2.3946684 | -3.3476 | -1.08298 | 0.0270994 leucine rich repeat containing 6                                   |
| 979  | 8049532 LRRFIP1   | -3.3223155 | -1.9131 | -0.98642 | 0.0035792 LRR binding FLII interacting protein 1                             |
| 980  | 8049512 LRRFIP1   | -2.9209081 | -2.5474 | -0.46578 | 0.0087637 LRR binding FLII interacting protein 1                             |
| 981  | 7954810 LRRK2     | 2.8640294  | -2.6361 | 1.002742 | 0.0099297 leucine rich repeat kinase 2                                       |
| 982  | 7942315 LRTOMT    | -2.8792084 | -2.6125 | -1.32366 | 0.0096047 leucine rich transmembrane and O-methyltransferase domain contai   |
| 983  | 8138912 LSM5      | -2.8786299 | -2.6134 | -0.71459 | 0.0096169 LSM5 homolog, U6 small nuclear RNA and mRNA degradation assoc      |
| 984  | 7937735 LSP1      | 2.402075   | -3.3367 | 0.876399 | 0.0266852 lymphocyte-specific protein 1                                      |
| 985  | 8177976 LTA       | 2.3260312  | -3.4476 | 0.455683 | 0.0312328 lymphotoxin alpha                                                  |
| 986  | 7987650 LTK       | 3.1093991  | -2.251  | 0.635662 | 0.0057709 leukocyte receptor tyrosine kinase                                 |
| 987  | 8107429 LYRN      | -2.2700528 | -3.5281 | -2.73609 | 0.0350283 laeverin                                                           |
| 988  | 7906622 LY9       | 2.7309385  | -2.842  | 1.59663  | 0.0132686 lymphocyte antigen 9                                               |
| 989  | 8045674 LYPD6     | -2.3775489 | -3.3727 | -1.3519  | 0.0280799 LY6/PLAUR domain containing 6                                      |
| 990  | 8045664 LYPD6B    | -3.4288802 | -1.7434 | -1.5658  | 0.0028131 LY6/PLAUR domain containing 6B                                     |
| 991  | 7919923 LYSMD1    | -2.7119998 | -2.871  | -0.82492 | 0.0138232 LysM domain containing 1                                           |
| 992  | 7988833 LYSMD2    | 2.9049141  | -2.5724 | 0.856839 | 0.0090775 LysM domain containing 2                                           |
| 993  | 7912292 LZIC      | -2.8763825 | -2.6169 | -0.63089 | 0.0096645 leucine zipper and CTNNBIP1 domain containing                      |
| 994  | 8086555 LZTFL1    | -2.8445369 | -2.6664 | -0.86639 | 0.0103626 leucine zipper transcription factor like 1                         |
| 995  | 8138466 MACC1     | -2.4500618 | -3.266  | -1.09168 | 0.0241414 metastasis associated in colon cancer 1                            |
| 996  | 7949033 MACROD1   | -2.2379548 | -3.5739 | -1.21161 | 0.0373921 MACRO domain containing 1                                          |
| 997  | 8019798 MAFG      | 2.221214   | -3.5977 | 0.455223 | 0.0386823 MAF bZIP transcription factor G                                    |
| 998  | 8131091 MAFK      | -2.4894529 | -3.2076 | -0.53794 | 0.0222248 MAF bZIP transcription factor K                                    |
| 999  | 8167815 MAGED2    | -2.3050688 | -3.4778 | -1.13049 | 0.0326072 MAGE family member D2                                              |
| 1000 | 8123893 MAK       | -2.4449037 | -3.2737 | -1.35381 | 0.0244036 male germ cell associated kinase                                   |
| 1001 | 8043504 MAL       | 2.3106684  | -3.4698 | 0.898154 | 0.0322347 mal, T-cell differentiation protein                                |
| 1002 | 8148040 MAL2      | -2.3040011 | -3.4794 | -1.2365  | 0.0326786 mal, T-cell differentiation protein 2 (gene/pseudogene)            |
| 1003 | 8170420 MAMLD1    | 3.0456013  | -2.3517 | 1.523504 | 0.0066515 mastermind like domain containing 1                                |
| 1004 | 8093916 MAN2B2    | -2.5116223 | -3.1745 | -0.641   | 0.0212099 mannosidase alpha class 2B member 2                                |
| 1005 | 7983228 MAP1A     | 2.1347621  | -3.7189 | 0.587586 | 0.0460179 microtubule associated protein 1A                                  |
| 1006 | 8005707 MAP2K3    | 2.5485556  | -3.1192 | 0.664841 | 0.0196152 mitogen-activated protein kinase kinase 3                          |
| 1007 | 8036525 MAP4K1    | 2.3310263  | -3.4403 | 1.082144 | 0.0309133 mitogen-activated protein kinase kinase kinase 1                   |
| 1008 | 8000811 MAPK3     | -2.7710678 | -2.7802 | -0.71556 | 0.0121628 mitogen-activated protein kinase 3                                 |
| 1009 | 8021199 MAPK4     | 2.4524244  | -3.2625 | 0.713938 | 0.0240223 mitogen-activated protein kinase 4                                 |
| 1010 | 8074108 MAPK8IP2  | -2.3407975 | -3.4262 | -3.56823 | 0.030297 mitogen-activated protein kinase 8 interacting protein 2            |
| 1011 | 8116402 MAPK9     | -4.8192031 | 0.4144  | -0.88956 | 0.0001191 mitogen-activated protein kinase 9                                 |
| 1012 | 8020878 MAPRE2    | 2.3962517  | -3.3453 | 0.744027 | 0.0270104 microtubule associated protein RP/EB family member 2               |
| 1013 | 7909866 MARC2///I | -2.5331364 | -3.1423 | -0.93247 | 0.0202667 mitochondrial amidoxime reducing component 2///mitochondrial an    |
| 1014 | 8105899 MARVELD   | -2.9362945 | -2.5233 | -1.05156 | 0.0084717 MARVEL domain containing 2                                         |
| 1015 | 8177498 MARVELD   | -2.9362945 | -2.5233 | -1.05156 | 0.0084717 MARVEL domain containing 2                                         |
| 1016 | 8105741 MAST4     | -2.8297036 | -2.6894 | -1.03479 | 0.0107042 microtubule associated serine/threonine kinase family member 4     |
| 1017 | 8150099 MBOAT4    | -2.2026733 | -3.6239 | -0.81182 | 0.0401589 membrane bound O-acyltransferase domain containing 4               |
| 1018 | 8106068 MCCC2     | -2.6201907 | -3.0111 | -0.98993 | 0.0168393 methylcrotonoyl-CoA carboxylase 2                                  |
| 1019 | 8177601 MCCC2     | -2.6201907 | -3.0111 | -0.98993 | 0.0168393 methylcrotonoyl-CoA carboxylase 2                                  |
| 1020 | 8146738 MCMDC2    | -2.9082237 | -2.5672 | -1.14338 | 0.0090117 minichromosome maintenance domain containing 2                     |

|      |                    |            |         |          |                                                                               |
|------|--------------------|------------|---------|----------|-------------------------------------------------------------------------------|
| 1021 | 7914996 MEAF6      | -2.4827976 | -3.2175 | -0.48822 | 0.0225383 MYST/Esa1 associated factor 6                                       |
| 1022 | 8032106 MED16      | -2.5572816 | -3.1061 | -0.48393 | 0.0192553 mediator complex subunit 16                                         |
| 1023 | 8007643 MEIOC      | -2.7456365 | -2.8194 | -1.20936 | 0.0128529 meiosis specific with coiled-coil domain                            |
| 1024 | 8005695 MEIS3///M  | -3.7792318 | -1.1859 | -1.24284 | 0.0012678 Meis homeobox 3///Meis homeobox 3 pseudogene 1                      |
| 1025 | 8005132 MEIS3///M  | -3.068973  | -2.3148 | -1.08335 | 0.0063147 Meis homeobox 3///Meis homeobox 3 pseudogene 1                      |
| 1026 | 8096290 MEPE       | -2.2690551 | -3.5296 | -1.66848 | 0.0350996 matrix extracellular phosphoglycoprotein                            |
| 1027 | 7991332 MESP1      | 2.2729119  | -3.524  | 0.409869 | 0.0348246 mesoderm posterior bHLH transcription factor 1                      |
| 1028 | 8136248 MEST       | 2.6225733  | -3.0074 | 1.217636 | 0.0167537 mesoderm specific transcript                                        |
| 1029 | 7957404 METTL25    | -2.4765969 | -3.2267 | -1.13013 | 0.0228341 methyltransferase like 25                                           |
| 1030 | 8009008 METTL2A    | -2.1643569 | -3.6777 | -0.52374 | 0.0433749 methyltransferase like 2A                                           |
| 1031 | 7988245 MFAP1      | -3.2193391 | -2.0768 | -0.51158 | 0.0045124 microfibrillar associated protein 1                                 |
| 1032 | 8109403 MFAP3      | -3.3106271 | -1.9317 | -0.56872 | 0.0036748 microfibrillar associated protein 3                                 |
| 1033 | 7897824 MFN2       | -2.2826854 | -3.51   | -0.50506 | 0.0341363 mitofusin 2                                                         |
| 1034 | 8040516 MFSD2B     | 2.7093264  | -2.8751 | 0.759104 | 0.0139033 major facilitator superfamily domain containing 2B                  |
| 1035 | 8116484 MGAT1      | 2.7384974  | -2.8303 | 0.478223 | 0.0130532 mannosyl (alpha-1,3-)-glycoprotein beta-1,2-N-acetylglucosaminyltra |
| 1036 | 8073129 MGAT3      | 3.0557844  | -2.3356 | 0.627569 | 0.0065027 mannosyl (beta-1,4-)-glycoprotein beta-1,4-N-acetylglucosaminyltra  |
| 1037 | 8061129 MGME1///   | -2.1925343 | -3.6381 | -0.44788 | 0.0409879 mitochondrial genome maintenance exonuclease 1///mitochondrial t    |
| 1038 | 8097513 MGST2      | -2.1373308 | -3.7153 | -0.63471 | 0.0457829 mitochondrial glutathione S-transferase 2                           |
| 1039 | 8028924 MIA-RAB4   | 2.1710652  | -3.6683 | 1.471985 | 0.0427954 MIA-RAB4B readthrough (NMD candidate)///melanoma inhibitory ac      |
| 1040 | 7938519 MICALCL    | -3.5764533 | -1.5082 | -1.27896 | 0.0020124 MICAL C-terminal like                                               |
| 1041 | 7970546 MICU2      | -2.3957334 | -3.3461 | -0.48163 | 0.0270395 mitochondrial calcium uptake 2                                      |
| 1042 | 8166797 MID1IP1    | -2.3127575 | -3.4668 | -0.84202 | 0.0320967 MID1 interacting protein 1                                          |
| 1043 | 8018343 MIF4G      | -2.1152963 | -3.7458 | -0.79079 | 0.0478353 MIF4G domain containing                                             |
| 1044 | 7970577 MIPEP      | -2.2257602 | -3.5912 | -0.73654 | 0.038328 mitochondrial intermediate peptidase                                 |
| 1045 | 7973985 MIPOL1     | -2.7197854 | -2.8591 | -0.84578 | 0.0135926 mirror-image polydactyly 1                                          |
| 1046 | 7957735 MIR135A2   | -2.1321901 | -3.7224 | -2.5455  | 0.0462544 microRNA 135a-2                                                     |
| 1047 | 7976806 MIR136     | -3.5106956 | -1.613  | -1.46394 | 0.0023368 microRNA 136                                                        |
| 1048 | 7997008 MIR140     | 2.1111208  | -3.7516 | 0.516087 | 0.0482336 microRNA 140                                                        |
| 1049 | 8059211 MIR153-1   | 2.1165317  | -3.7441 | 0.564116 | 0.0477181 microRNA 153-1                                                      |
| 1050 | 8068022 MIR155///I | 2.6955341  | -2.8963 | 0.974506 | 0.0143233 microRNA 155///MIR155 host gene                                     |
| 1051 | 7949273 MIR192     | -2.8214394 | -2.7023 | -0.82237 | 0.0108991 microRNA 192                                                        |
| 1052 | 8142977 MIR29B1    | -2.3470543 | -3.4171 | -3.44367 | 0.0299084 microRNA 29b-1                                                      |
| 1053 | 8013784 MIR451A    | -2.5920079 | -3.0537 | -0.83054 | 0.0178839 microRNA 451a                                                       |
| 1054 | 7957608 MIR492///I | -2.8207027 | -2.7034 | -1.53531 | 0.0109166 microRNA 492///keratin 19 pseudogene 2                              |
| 1055 | 8031035 MIR516B1   | -2.5714866 | -3.0847 | -4.86377 | 0.0186828 microRNA 516b-1                                                     |
| 1056 | 8031037 MIR519A2   | -3.1605841 | -2.17   | -6.61461 | 0.0051474 microRNA 519a-2///microRNA 517c                                     |
| 1057 | 7969574 MIR622///I | -2.3784406 | -3.3714 | -1.14523 | 0.028028 microRNA 622///keratin 18                                            |
| 1058 | 8067932 MIR99AHC   | 2.2978323  | -3.4883 | 2.10716  | 0.0330945 mir-99a-let-7c cluster host gene                                    |
| 1059 | 8030842 MIR99B     | 2.9654717  | -2.4776 | 0.640717 | 0.0079435 microRNA 99b                                                        |
| 1060 | 8073816 MIRLET7B   | -2.8299813 | -2.689  | -1.03147 | 0.0106977 MIRLET7B host gene                                                  |
| 1061 | 8024013 MISP       | -2.8978494 | -2.5834 | -1.91898 | 0.0092196 mitotic spindle positioning                                         |
| 1062 | 8064967 MKKS       | -2.2145383 | -3.6071 | -0.51995 | 0.0392081 McKusick-Kaufman syndrome                                           |
| 1063 | 8016909 MKS1       | -2.957008  | -2.4909 | -0.61558 | 0.0080933 Meckel syndrome, type 1                                             |
| 1064 | 7969093 MLNR       | 2.6710712  | -2.9336 | 0.504064 | 0.0150982 motilin receptor                                                    |
| 1065 | 8055672 MMADHC     | -3.2618227 | -2.0093 | -0.67229 | 0.0041016 methylmalonic aciduria and homocystinuria, cblD type                |
| 1066 | 8160521 MOB3B      | 2.5511675  | -3.1153 | 1.273385 | 0.0195068 MOB kinase activator 3B                                             |
| 1067 | 8048725 MOGAT1     | 3.1453395  | -2.1941 | 0.714984 | 0.0053259 monoacylglycerol O-acyltransferase 1                                |
| 1068 | 8141676 MOGAT3     | 2.3734217  | -3.3787 | 0.446663 | 0.0283211 monoacylglycerol O-acyltransferase 3                                |
| 1069 | 7911701 MORN1      | -2.9938258 | -2.4331 | -0.97826 | 0.0074607 MORN repeat containing 1                                            |
| 1070 | 8058824 MREG       | -2.2716427 | -3.5259 | -0.74104 | 0.0349149 melanoregulin                                                       |
| 1071 | 8093936 MRFAP1     | -3.0671487 | -2.3177 | -0.62458 | 0.0063404 Morf4 family associated protein 1                                   |
| 1072 | 8153426 MROH6      | 2.3016526  | -3.4828 | 0.642652 | 0.0328364 maestro heat like repeat family member 6                            |
| 1073 | 8016366 MRPL10     | -2.2609396 | -3.5412 | -0.39976 | 0.035685 mitochondrial ribosomal protein L10                                  |
| 1074 | 7937763 MRPL23     | 2.4580516  | -3.2542 | 0.580896 | 0.0237406 mitochondrial ribosomal protein L23                                 |
| 1075 | 8043278 MRPL35     | -2.2021491 | -3.6246 | -0.52295 | 0.0402013 mitochondrial ribosomal protein L35                                 |
| 1076 | 8053165 MRPL53     | -2.7175192 | -2.8626 | -0.7057  | 0.0136594 mitochondrial ribosomal protein L53                                 |
| 1077 | 8085531 MRPS25     | 2.3378142  | -3.4305 | 0.701636 | 0.030484 mitochondrial ribosomal protein S25                                  |
| 1078 | 8105852 MRPS36     | -2.1833057 | -3.6511 | -0.39183 | 0.0417562 mitochondrial ribosomal protein S36                                 |
| 1079 | 7940287 MS4A1      | 3.4143608  | -1.7665 | 2.991084 | 0.0029071 membrane spanning 4-domains A1                                      |
| 1080 | 7940299 MS4A12     | -2.1361067 | -3.717  | -0.70315 | 0.0458948 membrane spanning 4-domains A12                                     |
| 1081 | 8093756 MSANTD1    | 2.2311642  | -3.5836 | 0.394157 | 0.0379106 Myb/SANT DNA binding domain containing 1                            |
| 1082 | 7967039 MSI1       | 2.8456297  | -2.6647 | 0.78021  | 0.0103379 musashi RNA binding protein 1                                       |
| 1083 | 8166015 MSL3       | 2.9721424  | -2.4672 | 0.534173 | 0.0078273 male-specific lethal 3 homolog (Drosophila)                         |
| 1084 | 7927529 MSMB       | -2.2605555 | -3.5417 | -3.43244 | 0.035713 microsemipoprotein beta                                              |
| 1085 | 8087547 MST1R      | -4.5742875 | 0.049   | -2.05626 | 0.000207 macrophage stimulating 1 receptor                                    |
| 1086 | 8110084 MSX2       | -2.6736525 | -2.9297 | -1.78612 | 0.0150146 msh homeobox 2                                                      |
| 1087 | 8008716 MSX2P1     | 2.1851917  | -3.6485 | 0.629141 | 0.0415981 msh homeobox 2 pseudogene 1                                         |
| 1088 | 7995806 MT1A       | -2.6074286 | -3.0304 | -1.00958 | 0.017305 metallothionein 1A                                                   |
| 1089 | 7995820 MT1B       | -2.380541  | -3.3683 | -0.66748 | 0.0279062 metallothionein 1B                                                  |
| 1090 | 8001531 MT1G       | -2.7311277 | -2.8417 | -1.1426  | 0.0132632 metallothionein 1G                                                  |
| 1091 | 7995829 MT1H       | -2.2458087 | -3.5627 | -0.88342 | 0.0368005 metallothionein 1H                                                  |
| 1092 | 7995803 MT1JP      | -2.3979264 | -3.3428 | -0.77239 | 0.0269165 metallothionein 1J, pseudogene                                      |
| 1093 | 7995787 MT1M       | -2.5180743 | -3.1649 | -0.41081 | 0.0209228 metallothionein 1M                                                  |



|      |         |           |            |         |          |           |                                                                       |
|------|---------|-----------|------------|---------|----------|-----------|-----------------------------------------------------------------------|
| 1094 | 8095362 | MT2A      | -2.2362546 | -3.5763 | -0.76117 | 0.0375213 | metallothionein 2A                                                    |
| 1095 | 8095376 | MT2A      | -2.2362546 | -3.5763 | -0.76117 | 0.0375213 | metallothionein 2A                                                    |
| 1096 | 7966046 | MTERF2    | -2.8899681 | -2.5957 | -0.54843 | 0.0093806 | mitochondrial transcription termination factor 2                      |
| 1097 | 7912412 | MTOR      | -2.2014004 | -3.6257 | -0.38679 | 0.0402621 | mechanistic target of rapamycin                                       |
| 1098 | 8130383 | MTRF1L    | -2.334766  | -3.4349 | -0.67387 | 0.0306761 | mitochondrial translational release factor 1 like                     |
| 1099 | 8098705 | MTRF1L    | -2.236483  | -3.576  | -0.61787 | 0.0375039 | mitochondrial translational release factor 1 like                     |
| 1100 | 8046573 | MTX2      | -2.5064317 | -3.1823 | -0.5943  | 0.0214435 | metaxin 2                                                             |
| 1101 | 7947156 | MUC15     | 2.2608074  | -3.5414 | 2.008025 | 0.0356946 | mucin 15, cell surface associated                                     |
| 1102 | 8135048 | MUC17     | -2.258998  | -3.5439 | -3.16964 | 0.0358264 | mucin 17, cell surface associated                                     |
| 1103 | 8135015 | MUC3B///I | 2.152234   | -3.6946 | 0.494217 | 0.0444404 | mucin 3B, cell surface associated///mucin 3A, cell surface associated |
| 1104 | 8169145 | MUM1L1    | -2.2521026 | -3.5538 | -1.53661 | 0.0363327 | MUM1 like 1                                                           |
| 1105 | 8026751 | MVB12A    | -2.3260827 | -3.4475 | -0.55179 | 0.0312294 | multivesicular body subunit 12A                                       |
| 1106 | 8122202 | MYB///MY  | -3.4290078 | -1.7432 | -2.43626 | 0.0028123 | MYB proto-oncogene, transcription factor///MYB proto-oncogene, tr     |
| 1107 | 8012625 | MYH13     | 2.4442757  | -3.2746 | 0.585271 | 0.0244357 | myosin heavy chain 13                                                 |
| 1108 | 7956211 | MYL6      | -2.1057819 | -3.7589 | -0.43025 | 0.0487471 | myosin light chain 6                                                  |
| 1109 | 8033605 | MYO1F     | 2.1944437  | -3.6355 | 0.79732  | 0.0408306 | myosin 1F                                                             |
| 1110 | 8023267 | MYO5B     | -2.3566164 | -3.4032 | -0.86312 | 0.0293235 | myosin VB                                                             |
| 1111 | 7988876 | MYO5C     | -3.7242642 | -1.2731 | -0.99929 | 0.0014372 | myosin VC                                                             |
| 1112 | 8120783 | MYO6      | -2.7761299 | -2.7724 | -0.72241 | 0.0120297 | myosin VI                                                             |
| 1113 | 8114511 | MZB1      | 2.2279938  | -3.588  | 1.528367 | 0.038155  | marginal zone B and B1 cell specific protein                          |
| 1114 | 7956220 | NABP2     | -2.4163137 | -3.3158 | -0.65514 | 0.0259055 | nucleic acid binding protein 2                                        |
| 1115 | 7972601 | NALCN     | 3.1430209  | -2.1978 | 1.437633 | 0.0053535 | sodium leak channel, non-selective                                    |
| 1116 | 8144857 | NAT1      | -3.270153  | -1.9961 | -2.30624 | 0.0040255 | N-acetyltransferase 1                                                 |
| 1117 | 8141669 | NAT16     | 2.6591265  | -2.9519 | 0.725737 | 0.0154909 | N-acetyltransferase 16 (putative)                                     |
| 1118 | 8093578 | NAT8L     | 2.3054473  | -3.4773 | 0.728425 | 0.0325819 | N-acetyltransferase 8 like                                            |
| 1119 | 8047606 | NBEAL1    | -2.4177751 | -3.3137 | -0.50299 | 0.0258266 | neurobeachin like 1                                                   |
| 1120 | 8007471 | NBR1      | -2.6761132 | -2.9259 | -0.6494  | 0.0149353 | NBR1, autophagy cargo receptor                                        |
| 1121 | 8152119 | NCALD     | 3.2719752  | -1.9932 | 1.92483  | 0.004009  | neurocalcin delta                                                     |
| 1122 | 8067985 | NCAM2     | -2.5250202 | -3.1545 | -1.59227 | 0.0206178 | neural cell adhesion molecule 2                                       |
| 1123 | 8133518 | NCF1C///N | 2.2560285  | -3.5482 | 1.013463 | 0.0360436 | neutrophil cytosolic factor 1C pseudogene///neutrophil cytosolic fac  |
| 1124 | 8140227 | NCF1C///N | 2.2560285  | -3.5482 | 1.013463 | 0.0360436 | neutrophil cytosolic factor 1C pseudogene///neutrophil cytosolic fac  |
| 1125 | 8072744 | NCF4      | 2.2284654  | -3.5874 | 1.135975 | 0.0381185 | neutrophil cytosolic factor 4                                         |
| 1126 | 8057517 | NCKAP1    | -2.5489661 | -3.1186 | -0.50553 | 0.0195982 | NCK associated protein 1                                              |
| 1127 | 7977621 | NDRG2     | 2.3703035  | -3.3832 | 1.436135 | 0.0285047 | NDRG family member 2                                                  |
| 1128 | 7987642 | NDUFAF1   | -2.9111022 | -2.5627 | -0.84744 | 0.0089548 | NADH:ubiquinone oxidoreductase complex assembly factor 1              |
| 1129 | 8105499 | NDUFAF2   | 2.2076564  | -3.6168 | 0.436152 | 0.039757  | NADH:ubiquinone oxidoreductase complex assembly factor 2              |
| 1130 | 8081945 | NDUFB4    | -2.7922404 | -2.7475 | -0.63897 | 0.0116154 | NADH:ubiquinone oxidoreductase subunit B4                             |
| 1131 | 8093314 | NDUFB4    | -2.7922404 | -2.7475 | -0.63897 | 0.0116154 | NADH:ubiquinone oxidoreductase subunit B4                             |
| 1132 | 8058428 | NDUFS1    | -2.1133585 | -3.7485 | -0.35975 | 0.0480198 | NADH:ubiquinone oxidoreductase core subunit S1                        |
| 1133 | 8029507 | NECTIN2   | -2.5450462 | -3.1245 | -0.9045  | 0.0197618 | nectin cell adhesion molecule 2                                       |
| 1134 | 7957715 | NEDD1     | -2.1502005 | -3.6974 | -0.49062 | 0.0446214 | neural precursor cell expressed, developmentally down-regulated 1     |
| 1135 | 8082643 | NEK11     | -5.8997882 | 1.9117  | -1.66468 | 0.0000111 | NIMA related kinase 11                                                |
| 1136 | 7971757 | NEK5      | -2.9357988 | -2.5241 | -1.38023 | 0.0084809 | NIMA related kinase 5                                                 |
| 1137 | 7908543 | NEK7      | -2.5397847 | -3.1324 | -0.61093 | 0.0199834 | NIMA related kinase 7                                                 |
| 1138 | 7984704 | NEO1      | -2.4055883 | -3.3316 | -0.78698 | 0.0264908 | neogenin 1                                                            |
| 1139 | 7921088 | NES       | 2.988997   | -2.4407 | 1.508793 | 0.0075409 | nestin                                                                |
| 1140 | 8024623 | NFIC      | -2.4850259 | -3.2142 | -0.62616 | 0.0224329 | nuclear factor I C                                                    |
| 1141 | 7930074 | NFKB2     | 2.3941408  | -3.3484 | 0.572938 | 0.0271292 | nuclear factor kappa B subunit 2                                      |
| 1142 | 8126666 | NFKBIE    | 2.2882028  | -3.5021 | 0.428611 | 0.0337534 | NFKB inhibitor epsilon                                                |
| 1143 | 7965956 | NFYB      | -2.3175058 | -3.4599 | -0.45279 | 0.0317851 | nuclear transcription factor Y subunit beta                           |
| 1144 | 7985983 | NGRN      | -3.0040071 | -2.4171 | -0.6586  | 0.0072944 | neugrin, neurite outgrowth associated                                 |
| 1145 | 8162455 | NINJ1     | -2.1136283 | -3.7481 | -0.66251 | 0.0479941 | ninjurin 1                                                            |
| 1146 | 8094938 | NIPAL1    | 2.3208273  | -3.4551 | 0.855559 | 0.0315689 | NIPA like domain containing 1                                         |
| 1147 | 7906652 | NIT1      | -2.4377665 | -3.2842 | -0.61315 | 0.0247707 | nitrilase 1                                                           |
| 1148 | 8081277 | NIT2      | -2.3249278 | -3.4492 | -0.47769 | 0.0313037 | nitrilase family member 2                                             |
| 1149 | 8039557 | NLRP13    | 2.2375478  | -3.5745 | 0.536565 | 0.037423  | NLR family pyrin domain containing 13                                 |
| 1150 | 8039280 | NLRP7     | 2.4716333  | -3.2341 | 0.585665 | 0.0230735 | NLR family pyrin domain containing 7                                  |
| 1151 | 8083757 | NMD3      | -2.2033451 | -3.6229 | -0.43246 | 0.0401045 | NMD3 ribosome export adaptor                                          |
| 1152 | 8114354 | NME5      | -3.062936  | -2.3243 | -5.48583 | 0.0064001 | NME/NM23 family member 5                                              |
| 1153 | 7932227 | NMT2      | 2.3658408  | -3.3898 | 0.786965 | 0.0287693 | N-myristoyltransferase 2                                              |
| 1154 | 8022856 | NOL4      | 3.3778735  | -1.8246 | 1.047058 | 0.0031572 | nucleolar protein 4                                                   |
| 1155 | 8046099 | NOSTRIN   | -2.276434  | -3.519  | -1.32948 | 0.0345751 | nitric oxide synthase trafficking                                     |
| 1156 | 8010696 | NPB       | 2.1849793  | -3.6488 | 0.438512 | 0.0416159 | neuropeptide B                                                        |
| 1157 | 8019693 | NPB       | 2.1849793  | -3.6488 | 0.438512 | 0.0416159 | neuropeptide B                                                        |
| 1158 | 7922627 | NPHS2     | 3.2271386  | -2.0644 | 0.685092 | 0.0044341 | NPHS2, podocin                                                        |
| 1159 | 8019074 | NPTX1     | 2.1190407  | -3.7407 | 0.441614 | 0.0474808 | neuronal pentraxin 1                                                  |
| 1160 | 8002303 | NQO1      | -2.1903574 | -3.6412 | -1.53075 | 0.041168  | NAD(P)H quinone dehydrogenase 1                                       |
| 1161 | 7957835 | NR1H4     | 2.7019186  | -2.8865 | 6.09547  | 0.0141274 | nuclear receptor subfamily 1 group H member 4                         |
| 1162 | 8169115 | NRK       | -2.7437495 | -2.8223 | -1.80426 | 0.0129056 | Nik related kinase                                                    |
| 1163 | 8084951 | NRROS     | 2.146022   | -3.7032 | 0.756583 | 0.0449955 | negative regulator of reactive oxygen species                         |
| 1164 | 8060339 | NRSN2     | -2.133767  | -3.7203 | -0.67707 | 0.0461093 | neurensin 2                                                           |
| 1165 | 7924172 | NSL1      | -2.1360719 | -3.7171 | -0.53052 | 0.0458979 | NSL1, MIS12 kinetochore complex component                             |
| 1166 | 8121578 | NT5DC1    | -2.9683396 | -2.4731 | -0.77909 | 0.0078933 | 5'-nucleotidase domain containing 1                                   |

|      |         |           |            |         |          |           |                                                                     |
|------|---------|-----------|------------|---------|----------|-----------|---------------------------------------------------------------------|
| 1167 | 7909142 | NUCKS1    | -2.6186584 | -3.0134 | -0.70122 | 0.0168946 | nuclear casein kinase and cyclin dependent kinase substrate 1       |
| 1168 | 8113413 | NUDT12    | -2.7155812 | -2.8655 | -0.91412 | 0.0137167 | nudix hydrolase 12                                                  |
| 1169 | 8082667 | NUDT16    | -5.7749502 | 1.7491  | -1.01613 | 0.0000145 | nudix hydrolase 16                                                  |
| 1170 | 7993019 | NUDT16L1  | -2.1482723 | -3.7001 | -0.56277 | 0.0447937 | nudix hydrolase 16 like 1                                           |
| 1171 | 8149979 | NUGGC     | 2.9840628  | -2.4485 | 0.81894  | 0.0076237 | nuclear GTPase, germinal center associated                          |
| 1172 | 7968132 | NUP58     | -2.8612891 | -2.6404 | -0.5572  | 0.0099895 | nucleoporin 58                                                      |
| 1173 | 8000574 | NUPR1     | -2.2422771 | -3.5678 | -0.74499 | 0.0370655 | nuclear protein 1, transcriptional regulator                        |
| 1174 | 8131506 | NXPH1     | -2.2581413 | -3.5452 | -4.32506 | 0.035889  | neurexophilin 1                                                     |
| 1175 | 7986838 | OCA2      | 2.333744   | -3.4364 | 0.644731 | 0.0307407 | OCA2 melanosomal transmembrane protein                              |
| 1176 | 8105908 | OCLN///LC | -3.9036623 | -0.989  | -1.24866 | 0.0009542 | occludin///occludin pseudogene                                      |
| 1177 | 8095456 | ODAM      | 2.5449254  | -3.1246 | 1.166492 | 0.0197668 | odontogenic, ameloblast associated                                  |
| 1178 | 8033818 | OLFM2     | 4.6058987  | 0.0966  | 1.215024 | 0.0001927 | olfactomedin 2                                                      |
| 1179 | 8014057 | OMG       | -2.6757431 | -2.9265 | -2.09101 | 0.0149472 | oligodendrocyte myelin glycoprotein                                 |
| 1180 | 8021357 | ONECUT2   | 2.1300216  | -3.7254 | 0.441129 | 0.0464547 | one cut homeobox 2                                                  |
| 1181 | 7938172 | OR10A5    | -3.348731  | -1.871  | -4.14507 | 0.0033721 | olfactory receptor family 10 subfamily A member 5                   |
| 1182 | 7977767 | OR10G3    | -2.1815029 | -3.6536 | -2.27945 | 0.0419078 | olfactory receptor family 10 subfamily G member 3                   |
| 1183 | 8178289 | OR12D3    | -2.9930069 | -2.4344 | -0.82415 | 0.0074743 | olfactory receptor family 12 subfamily D member 3                   |
| 1184 | 8124645 | OR12D3    | -2.2347485 | -2.5785 | -0.55557 | 0.0376361 | olfactory receptor family 12 subfamily D member 3                   |
| 1185 | 7992863 | OR1F1     | 2.6638545  | -2.9447 | 0.566348 | 0.0153343 | olfactory receptor family 1 subfamily F member 1                    |
| 1186 | 8157698 | OR1K1     | -2.4032213 | -3.3351 | -0.70849 | 0.0266216 | olfactory receptor family 1 subfamily K member 1                    |
| 1187 | 8157679 | OR1Q1     | -2.2486832 | -3.5586 | -0.95981 | 0.0365862 | olfactory receptor family 1 subfamily Q member 1                    |
| 1188 | 7911265 | OR2M2     | -2.1574624 | -3.6873 | -1.45685 | 0.043978  | olfactory receptor family 2 subfamily M member 2                    |
| 1189 | 7925755 | OR2T11    | 2.2573154  | -3.5463 | 0.668133 | 0.0359494 | olfactory receptor family 2 subfamily T member 11 (gene/pseudoger   |
| 1190 | 7940177 | OR4D10    | 2.5496479  | -3.1175 | 0.770839 | 0.0195698 | olfactory receptor family 4 subfamily D member 10                   |
| 1191 | 7973296 | OR4E2     | -2.1286542 | -3.7273 | -2.59758 | 0.0465813 | olfactory receptor family 4 subfamily E member 2                    |
| 1192 | 7896744 | OR4F29/// | -2.8231281 | -2.6996 | -1.42584 | 0.010859  | olfactory receptor family 4 subfamily F member 29///olfactory recep |
| 1193 | 7911345 | OR4F29/// | -2.8231281 | -2.6996 | -1.42584 | 0.010859  | olfactory receptor family 4 subfamily F member 29///olfactory recep |
| 1194 | 8110672 | OR4F29/// | -2.8231281 | -2.6996 | -1.42584 | 0.010859  | olfactory receptor family 4 subfamily F member 29///olfactory recep |
| 1195 | 8148962 | OR4F29/// | -2.8231281 | -2.6996 | -1.42584 | 0.010859  | olfactory receptor family 4 subfamily F member 29///olfactory recep |
| 1196 | 7946125 | OR52B2    | -2.0977719 | -3.77   | -0.93211 | 0.0495269 | olfactory receptor family 52 subfamily B member 2                   |
| 1197 | 7937986 | OR52J3    | -2.3043047 | -3.479  | -0.59367 | 0.0326583 | olfactory receptor family 52 subfamily F member 3                   |
| 1198 | 7937942 | OR52K1    | -2.1445291 | -3.7053 | -0.7488  | 0.0451299 | olfactory receptor family 52 subfamily K member 1                   |
| 1199 | 7946105 | OR52N5    | -2.2344826 | -3.5788 | -4.28869 | 0.0376564 | olfactory receptor family 52 subfamily N member 5                   |
| 1200 | 8081192 | OR5AC2    | 2.48792    | -3.2099 | 0.723675 | 0.0222967 | olfactory receptor family 5 subfamily AC member 2                   |
| 1201 | 7938261 | OR5E1P    | 3.0476319  | -2.3485 | 0.656979 | 0.0066216 | olfactory receptor family 5 subfamily E member 1 pseudogene         |
| 1202 | 8060084 | OR6B3     | -2.3264882 | -3.4469 | -0.41448 | 0.0312034 | olfactory receptor family 6 subfamily B member 3                    |
| 1203 | 7973303 | OR6C4     | 2.6776141  | -2.9237 | 1.405841 | 0.0148871 | olfactory receptor family 6 subfamily C member 4                    |
| 1204 | 7952373 | OR6X1     | 3.3738786  | -1.831  | 0.662136 | 0.0031859 | olfactory receptor family 6 subfamily X member 1                    |
| 1205 | 8138151 | OR7E37P// | 2.5294034  | -3.1479 | 0.567655 | 0.0204275 | olfactory receptor family 7 subfamily E member 37 pseudogene///M    |
| 1206 | 8156319 | OR7E37P// | 2.1588312  | -3.6854 | 0.493935 | 0.0438577 | olfactory receptor family 7 subfamily E member 37 pseudogene///M    |
| 1207 | 8082244 | OR7E37P// | 2.288651   | -3.5015 | 0.537748 | 0.0337224 | olfactory receptor family 7 subfamily E member 37 pseudogene///ol   |
| 1208 | 8082248 | OR7E37P// | 2.1751309  | -3.6626 | 0.500396 | 0.0424476 | olfactory receptor family 7 subfamily E member 37 pseudogene///ol   |
| 1209 | 7971241 | OR7E37P// | 2.1276083  | -3.7288 | 0.491846 | 0.0466784 | olfactory receptor family 7 subfamily E member 37 pseudogene///ol   |
| 1210 | 8045887 | OR7E37P// | 2.1276083  | -3.7288 | 0.491846 | 0.0466784 | olfactory receptor family 7 subfamily E member 37 pseudogene///ol   |
| 1211 | 7939994 | OR9G9///C | -3.1440668 | -2.1961 | -0.55728 | 0.005341  | olfactory receptor family 9 subfamily G member 9///olfactory recept |
| 1212 | 7956031 | ORMDL2    | -2.6187637 | -3.0132 | -0.76465 | 0.0168908 | ORMDL sphingolipid biosynthesis regulator 2                         |
| 1213 | 8046646 | OSBPL6    | -2.6131564 | -3.0217 | -1.2819  | 0.0170945 | oxysterol binding protein like 6                                    |
| 1214 | 7914923 | OSCP1     | -3.0082589 | -2.4104 | -0.85135 | 0.007226  | organic solute carrier partner 1                                    |
| 1215 | 8050497 | OSR1      | 3.0178017  | -2.3954 | 0.901907 | 0.0070748 | odd-skipped related transcription factor 1                          |
| 1216 | 8009705 | OTOP2     | 2.4068769  | -3.3297 | 0.5201   | 0.0264198 | otopetrin 2                                                         |
| 1217 | 7976425 | OTUB2     | -2.1719293 | -3.6671 | -0.85874 | 0.0427213 | OTU deubiquitinase, ubiquitin aldehyde binding 2                    |
| 1218 | 7919699 | OTUD7B    | -2.423858  | -3.3047 | -0.67141 | 0.025501  | OTU deubiquitinase 7B                                               |
| 1219 | 8078173 | OXNAD1    | 2.6371233  | -2.9853 | 0.620224 | 0.0162398 | oxidoreductase NAD binding domain containing 1                      |
| 1220 | 8011499 | P2RX1     | 2.8368907  | -2.6783 | 1.231838 | 0.0105374 | purinergic receptor P2X 1                                           |
| 1221 | 7959267 | P2RX4     | -2.101263  | -3.7652 | -0.61869 | 0.0491857 | purinergic receptor P2X 4                                           |
| 1222 | 8011415 | P2RX5-TA) | 2.7957969  | -2.742  | 1.50768  | 0.0115258 | P2RX5-TAX1BP3 readthrough (NMD candidate)///purinergic receptor     |
| 1223 | 8091511 | P2RY14    | 2.2749604  | -3.5211 | 1.064913 | 0.0346792 | purinergic receptor P2Y14                                           |
| 1224 | 8171136 | P2RY8     | 2.8964163  | -2.5856 | 1.386184 | 0.0092487 | purinergic receptor P2Y8                                            |
| 1225 | 8177026 | P2RY8     | 2.8964163  | -2.5856 | 1.386184 | 0.0092487 | purinergic receptor P2Y8                                            |
| 1226 | 7915444 | P3H1      | 2.3232457  | -3.4516 | 0.809869 | 0.0314123 | prolyl 3-hydroxylase 1                                              |
| 1227 | 8079677 | P4HTM     | -2.7965202 | -2.7409 | -0.75742 | 0.0115077 | prolyl 4-hydroxylase, transmembrane                                 |
| 1228 | 7942476 | PAAF1     | -2.3633887 | -3.3933 | -1.00906 | 0.0289156 | proteasomal ATPase associated factor 1                              |
| 1229 | 8167592 | PAGE4     | 3.146268   | -2.1926 | 0.592888 | 0.0053148 | PAGE family member 4                                                |
| 1230 | 8115681 | PANK3     | -2.6406041 | -2.9801 | -0.6465  | 0.016119  | pantothenate kinase 3                                               |
| 1231 | 8120215 | PAQR8     | 2.1919797  | -3.6389 | 0.868804 | 0.0410337 | progesterin and adipoQ receptor family member 8                     |
| 1232 | 8047709 | PARD3B    | -2.5045944 | -3.185  | -0.71233 | 0.0215268 | par-3 family cell polarity regulator beta                           |
| 1233 | 7897404 | PARK7     | -3.1480604 | -2.1898 | -0.54672 | 0.0052936 | Parkinsonism associated deglycase                                   |
| 1234 | 8082086 | PARP15    | 2.4205044  | -3.3097 | 1.411462 | 0.025568  | poly(ADP-ribose) polymerase family member 15                        |
| 1235 | 8073682 | PARVG     | 2.8519068  | -2.655  | 0.903847 | 0.0101969 | parvin gamma                                                        |
| 1236 | 7901804 | PATJ      | -2.3531866 | -3.4082 | -0.7368  | 0.0295321 | PATJ, crumbs cell polarity complex component                        |
| 1237 | 7988327 | PATL2     | 2.2779904  | -3.5168 | 0.771739 | 0.0344654 | PAT1 homolog 2                                                      |
| 1238 | 7965112 | PAWR      | -3.53823   | -1.5691 | -0.7979  | 0.0021951 | pro-apoptotic WT1 regulator                                         |
| 1239 | 8161211 | PAX5      | 2.9716099  | -2.468  | 1.594964 | 0.0078365 | paired box 5                                                        |

|      |                   |            |         |          |           |                                                                       |
|------|-------------------|------------|---------|----------|-----------|-----------------------------------------------------------------------|
| 1240 | 7973974 PAX9      | -3.7408148 | -1.2468 | -2.22984 | 0.0013839 | paired box 9                                                          |
| 1241 | 8129876 PBOV1     | -2.2376947 | -3.5743 | -2.7562  | 0.0374119 | prostate and breast cancer overexpressed 1                            |
| 1242 | 7955817 PCBP2     | -2.2327323 | -3.5813 | -0.46991 | 0.0377903 | poly(rC) binding protein 2                                            |
| 1243 | 8108720 PCDHB9    | 2.2525533  | -3.5531 | 1.1251   | 0.0362994 | protocadherin beta 9                                                  |
| 1244 | 7906742 PCP4L1    | 2.1988985  | -3.6292 | 0.571648 | 0.0404657 | Purkinje cell protein 4 like 1                                        |
| 1245 | 8060294 PDCD1     | 2.447914   | -3.2692 | 0.59128  | 0.0242503 | programmed cell death 1                                               |
| 1246 | 8057004 PDE11A    | -2.5615219 | -3.0997 | -2.3077  | 0.0190827 | phosphodiesterase 11A                                                 |
| 1247 | 8151074 PDE7A     | 3.1147197  | -2.2426 | 0.952472 | 0.0057028 | phosphodiesterase 7A                                                  |
| 1248 | 8122222 PDE7B     | 2.2039999  | -3.622  | 1.134567 | 0.0400515 | phosphodiesterase 7B                                                  |
| 1249 | 8088384 PDHB      | -2.232946  | -3.581  | -0.47724 | 0.0377739 | pyruvate dehydrogenase (lipoamide) beta                               |
| 1250 | 7991815 PDIA2     | 2.4767213  | -3.2265 | 0.458206 | 0.0228281 | protein disulfide isomerase family A member 2                         |
| 1251 | 8052654 PELI1     | 2.6027982  | -3.0374 | 0.869946 | 0.0174769 | pellino E3 ubiquitin protein ligase 1                                 |
| 1252 | 7991323 PEX11A    | -2.4929264 | -3.2024 | -0.9871  | 0.0220628 | peroxisomal biogenesis factor 11 alpha                                |
| 1253 | 8014264 PEX12     | -2.8537999 | -2.652  | -0.97484 | 0.0101547 | peroxisomal biogenesis factor 12                                      |
| 1254 | 7940421 PGA4///PG | 2.1037949  | -3.7617 | 0.445061 | 0.0489395 | pepsinogen 4, group I (pepsinogen A)///pepsinogen 3, group I (pep-    |
| 1255 | 8113591 PGGT1B    | -2.4372501 | -3.285  | -0.64184 | 0.0247975 | protein geranylgeranyltransferase type I subunit beta                 |
| 1256 | 8126916 PGK2      | -2.1531072 | -3.6934 | -3.02643 | 0.0443629 | phosphoglycerate kinase 2                                             |
| 1257 | 8116932 PHACTR1   | 2.2932186  | -3.4949 | 1.335593 | 0.0334087 | phosphatase and actin regulator 1                                     |
| 1258 | 7953812 PHC1      | 2.5805237  | -3.0711 | 0.930857 | 0.0183269 | polyhomeotic homolog 1                                                |
| 1259 | 7963869 PHC1      | 2.5805237  | -3.0711 | 0.930857 | 0.0183269 | polyhomeotic homolog 1                                                |
| 1260 | 8083850 PHC3      | -2.2270544 | -3.5894 | -1.10021 | 0.0382276 | polyhomeotic homolog 3                                                |
| 1261 | 7897322 PHF13     | -2.4544163 | -3.2596 | -0.62643 | 0.0239222 | PHD finger protein 13                                                 |
| 1262 | 8046186 PHOSPHO.  | -2.2932705 | -3.4948 | -0.85721 | 0.0334051 | PHOSPHO2-KLHL23 readthrough///phosphatase, orphan 2///kelch III       |
| 1263 | 8159441 PHPT1     | -2.300441  | -3.4845 | -0.38623 | 0.032918  | phosphohistidine phosphatase 1                                        |
| 1264 | 7960682 PIANP     | 2.5164735  | -3.1673 | 0.404419 | 0.0209937 | PILR alpha associated neural protein                                  |
| 1265 | 7989680 PIF1      | 2.4960975  | -3.1977 | 0.428238 | 0.0219159 | PIF1 5'-to-3' DNA helicase                                            |
| 1266 | 7983811 PIGB      | -3.1044856 | -2.2587 | -0.6184  | 0.0058345 | phosphatidylinositol glycan anchor biosynthesis class B               |
| 1267 | 7899244 PIGV      | -2.2937216 | -3.4942 | -0.68562 | 0.0333743 | phosphatidylinositol glycan anchor biosynthesis class V               |
| 1268 | 8084955 PIGX      | -3.0972715 | -2.2701 | -0.86016 | 0.0059291 | phosphatidylinositol glycan anchor biosynthesis class X               |
| 1269 | 7951672 PIH1D2    | -3.8345561 | -1.0982 | -1.96877 | 0.0011173 | PIH1 domain containing 2                                              |
| 1270 | 8090639 PIK3R4    | -2.1618241 | -3.6812 | -0.47677 | 0.0435956 | phosphoinositide-3-kinase regulatory subunit 4                        |
| 1271 | 8172471 PIM2      | 4.0600012  | -0.7431 | 1.544748 | 0.0006676 | Pim-2 proto-oncogene, serine/threonine kinase                         |
| 1272 | 7956524 PIP4K2C   | -2.4676034 | -3.24   | -0.80254 | 0.0232696 | phosphatidylinositol-5-phosphate 4-kinase type 2 gamma                |
| 1273 | 8139534 PKD1L1    | -2.1053115 | -3.7596 | -1.11657 | 0.0487926 | polycystin 1 like 1, transient receptor potential channel interacting |
| 1274 | 8126954 PKHD1     | -2.1272348 | -3.7293 | -2.86724 | 0.0467131 | polycystic kidney and hepatic disease 1 (autosomal recessive)         |
| 1275 | 8121768 PKIB      | -2.502146  | -3.1887 | -1.73559 | 0.0216383 | protein kinase (cAMP-dependent, catalytic) inhibitor beta             |
| 1276 | 7990151 PKM       | -2.1773739 | -3.6594 | -0.61156 | 0.0422569 | pyruvate kinase, muscle                                               |
| 1277 | 7948987 PLA2G16   | -3.605224  | -1.4624 | -1.334   | 0.0018849 | phospholipase A2 group XVI                                            |
| 1278 | 7913226 PLA2G2D   | 2.2458903  | -3.5626 | 0.852525 | 0.0367944 | phospholipase A2 group IID                                            |
| 1279 | 7908351 PLA2G4A   | 2.9807681  | -2.4536 | 1.555519 | 0.0076794 | phospholipase A2 group IVA                                            |
| 1280 | 8126784 PLA2G7    | 3.5868212  | -1.4917 | 1.478808 | 0.0019655 | phospholipase A2 group VII                                            |
| 1281 | 8101429 PLAC8     | 2.5743418  | -3.0804 | 1.717992 | 0.0185696 | placenta specific 8                                                   |
| 1282 | 7961440 PLBD1     | 3.1136889  | -2.2442 | 0.971077 | 0.0057159 | phospholipase B domain containing 1                                   |
| 1283 | 7997453 PLCG2     | 3.4664342  | -1.6835 | 1.454234 | 0.0025837 | phospholipase C gamma 2                                               |
| 1284 | 8078187 PLCL2     | 2.1700792  | -3.6697 | 0.891898 | 0.0428802 | phospholipase C like 2                                                |
| 1285 | 8111887 PLCXD3    | -2.139051  | -3.7129 | -2.42937 | 0.045626  | phosphatidylinositol specific phospholipase C X domain containing 3   |
| 1286 | 7925511 PLD5      | 2.1454903  | -3.704  | 0.594502 | 0.0450434 | phospholipase D family member 5                                       |
| 1287 | 8045247 PLEKHB2   | -2.191624  | -3.6394 | -0.56929 | 0.0410631 | pleckstrin homology domain containing B2                              |
| 1288 | 8027398 PLEKHF1   | 2.4946237  | -3.1999 | 0.725007 | 0.0219841 | pleckstrin homology and FYVE domain containing 1                      |
| 1289 | 8147439 PLEKHF2   | -2.5239049 | -3.1561 | -0.85861 | 0.0206665 | pleckstrin homology and FYVE domain containing 2                      |
| 1290 | 8122756 PLEKHG1// | 3.4938019  | -1.6399 | 1.358957 | 0.0024281 | pleckstrin homology and RhoGEF domain containing G1///pleckstrin      |
| 1291 | 7896798 PLEKHN1   | -3.4173396 | -1.7618 | -0.86401 | 0.0028876 | pleckstrin homology domain containing N1                              |
| 1292 | 7905116 PLEKHO1   | 3.3714435  | -1.8349 | 0.925977 | 0.0032035 | pleckstrin homology domain containing O1                              |
| 1293 | 8169061 PLP1      | 2.3876009  | -3.358  | 0.76457  | 0.0275003 | proteolipid protein 1                                                 |
| 1294 | 8083146 PLS1      | -3.356037  | -1.8594 | -1.52873 | 0.0033169 | plastin 1                                                             |
| 1295 | 8121087 PM20D2    | 2.287643   | -3.5029 | 0.889371 | 0.033792  | peptidase M20 domain containing 2                                     |
| 1296 | 8104627 PMCHL1    | -2.3984496 | -3.3421 | -3.43725 | 0.0268872 | pro-melanin concentrating hormone like 1 (pseudogene)                 |
| 1297 | 8145603 PNOC      | 2.4408029  | -3.2797 | 0.452223 | 0.0246139 | prepronociceptin                                                      |
| 1298 | 7937485 PNPLA2    | -2.6105624 | -3.0257 | -0.72755 | 0.0171895 | patatin like phospholipase domain containing 2                        |
| 1299 | 8171229 PNPLA4    | -2.7735071 | -2.7764 | -1.06195 | 0.0120985 | patatin like phospholipase domain containing 4                        |
| 1300 | 8008064 PNPO      | -2.7511301 | -2.8109 | -0.62627 | 0.0127007 | pyridoxamine 5'-phosphate oxidase                                     |
| 1301 | 7965343 POC1B     | -2.3081096 | -3.4735 | -0.43792 | 0.0324044 | POC1 centriolar protein B                                             |
| 1302 | 8173869 POF1B     | -2.8134608 | -2.7146 | -2.6509  | 0.0110905 | premature ovarian failure, 1B                                         |
| 1303 | 8042953 POLE4     | -2.6748647 | -2.9279 | -0.66763 | 0.0149755 | DNA polymerase epsilon 4, accessory subunit                           |
| 1304 | 7945573 POLR2L    | -2.6891109 | -2.9061 | -0.81932 | 0.014523  | RNA polymerase II subunit L                                           |
| 1305 | 8022428 POTEB3/// | -3.2034326 | -2.102  | -4.5693  | 0.0046763 | POTE ankyrin domain family member B3///POTE ankyrin domain fan        |
| 1306 | 8055222 POTEB3/// | -3.1450016 | -2.1946 | -6.12466 | 0.0053299 | POTE ankyrin domain family member B3///POTE ankyrin domain fan        |
| 1307 | 7977456 POTEB3/// | -3.0288979 | -2.378  | -3.994   | 0.0069028 | POTE ankyrin domain family member B3///POTE ankyrin domain fan        |
| 1308 | 8067844 POTEB3/// | -2.7235019 | -2.8534 | -4.40202 | 0.0134838 | POTE ankyrin domain family member B3///POTE ankyrin domain fan        |
| 1309 | 7986605 POTEB3/// | -2.5226477 | -3.158  | -3.56781 | 0.0207215 | POTE ankyrin domain family member B3///POTE ankyrin domain fan        |
| 1310 | 8074170 POTEB3/// | -2.4996509 | -3.1924 | -3.64427 | 0.0217524 | POTE ankyrin domain family member B3///POTE ankyrin domain fan        |
| 1311 | 8045257 POTEB3/// | -2.4742475 | -3.2302 | -4.13314 | 0.0229471 | POTE ankyrin domain family member B3///POTE ankyrin domain fan        |
| 1312 | 8055153 POTEB3/// | -2.4742475 | -3.2302 | -4.13314 | 0.0229471 | POTE ankyrin domain family member B3///POTE ankyrin domain fan        |

|      |         |            |            |         |          |           |                                                                      |
|------|---------|------------|------------|---------|----------|-----------|----------------------------------------------------------------------|
| 1313 | 8045208 | POTEF///Pi | -2.7610421 | -2.7956 | -2.6417  | 0.0124305 | POTE ankyrin domain family member F///POTE ankyrin domain fami       |
| 1314 | 8045321 | POTEF///Pi | -2.2391498 | -3.5722 | -0.86997 | 0.0373015 | POTE ankyrin domain family member F///POTE ankyrin domain fami       |
| 1315 | 7951596 | POU2AF1    | 3.1181788  | -2.2371 | 0.735221 | 0.005659  | POU class 2 associating factor 1                                     |
| 1316 | 8108949 | POU4F3     | -2.774387  | -2.7751 | -0.51768 | 0.0120754 | POU class 4 homeobox 3                                               |
| 1317 | 7964577 | PP12T19    | -2.2246844 | -3.5927 | -0.58693 | 0.0384116 | uncharacterized LOC100653022                                         |
| 1318 | 8073826 | PPARA      | 3.3680378  | -1.8403 | 0.738252 | 0.0032282 | peroxisome proliferator activated receptor alpha                     |
| 1319 | 8100990 | PPBPP2     | 2.1735919  | -3.6647 | 0.959595 | 0.042579  | pro-platelet basic protein pseudogene 2                              |
| 1320 | 8064100 | PPDPF      | -2.1098284 | -3.7534 | -0.61507 | 0.0483574 | pancreatic progenitor cell differentiation and proliferation factor  |
| 1321 | 8030220 | PPFIA3     | 2.4030295  | -3.3353 | 1.025392 | 0.0266323 | PTPRF interacting protein alpha 3                                    |
| 1322 | 7904997 | PPIAL4C/// | -2.4646914 | -3.2444 | -0.4053  | 0.0234122 | peptidylprolyl isomerase A like 4C///peptidylprolyl isomerase A like |
| 1323 | 7905016 | PPIAL4C/// | -2.4646914 | -3.2444 | -0.4053  | 0.0234122 | peptidylprolyl isomerase A like 4C///peptidylprolyl isomerase A like |
| 1324 | 7919436 | PPIAL4C/// | -2.4646914 | -3.2444 | -0.4053  | 0.0234122 | peptidylprolyl isomerase A like 4C///peptidylprolyl isomerase A like |
| 1325 | 7919157 | PPIAL4C/// | -2.4029066 | -3.3355 | -0.38662 | 0.0266391 | peptidylprolyl isomerase A like 4C///peptidylprolyl isomerase A like |
| 1326 | 7919407 | PPIAL4C/// | -2.3111008 | -3.4692 | -0.3955  | 0.032206  | peptidylprolyl isomerase A like 4C///peptidylprolyl isomerase A like |
| 1327 | 8008768 | PPM1E      | 2.3875741  | -3.358  | 0.994193 | 0.0275018 | protein phosphatase, Mg2+/Mn2+ dependent 1E                          |
| 1328 | 8083749 | PPM1L      | 2.3498612  | -3.413  | 0.795228 | 0.0297356 | protein phosphatase, Mg2+/Mn2+ dependent 1L                          |
| 1329 | 8172197 | PPP1R2P9   | 2.662084   | -2.9474 | 0.571318 | 0.0153928 | protein phosphatase 1 regulatory inhibitor subunit 2 pseudogene 9    |
| 1330 | 7934997 | PPP1R3C    | -2.1143341 | -3.7472 | -1.05223 | 0.0479268 | protein phosphatase 1 regulatory subunit 3C                          |
| 1331 | 8167476 | PPP1R3F    | -2.3286742 | -3.4438 | 0.494513 | 0.0310633 | protein phosphatase 1 regulatory subunit 3F                          |
| 1332 | 8114900 | PPP2R2B    | 2.2241502  | -3.5935 | 1.033841 | 0.0384531 | protein phosphatase 2 regulatory subunit Bbeta                       |
| 1333 | 8121257 | PRDM1      | 2.6380182  | -2.984  | 1.113636 | 0.0162086 | PR/SET domain 1                                                      |
| 1334 | 7940996 | PRDX5      | -2.7088917 | -2.8758 | -0.71869 | 0.0139164 | peroxiredoxin 5                                                      |
| 1335 | 7934161 | PRF1       | 2.3802666  | -3.3687 | 0.80038  | 0.027922  | perforin 1                                                           |
| 1336 | 7962375 | PRICKLE1   | 2.2255148  | -3.5916 | 0.95962  | 0.038347  | prickle planar cell polarity protein 1                               |
| 1337 | 8088550 | PRICKLE2   | -2.6271559 | -3.0005 | -0.93119 | 0.0165902 | prickle planar cell polarity protein 2                               |
| 1338 | 7901720 | PRKAA2     | -3.1784634 | -2.1416 | -1.92763 | 0.0049454 | protein kinase AMP-activated catalytic subunit alpha 2               |
| 1339 | 7994131 | PRKCB      | 2.7603112  | -2.7968 | 1.515094 | 0.0124502 | protein kinase C beta                                                |
| 1340 | 7931930 | PRKCC      | 2.4949857  | -3.1993 | 1.420985 | 0.0219673 | protein kinase C theta                                               |
| 1341 | 8171182 | PRKX       | 2.5342597  | -3.1406 | 1.090036 | 0.0202186 | protein kinase, X-linked                                             |
| 1342 | 7936590 | PRLHR      | 2.3663848  | -3.389  | 0.864642 | 0.0287369 | prolactin releasing hormone receptor                                 |
| 1343 | 7903884 | PROK1      | 3.0374842  | -2.3645 | 0.485514 | 0.0067725 | prokineticin 1                                                       |
| 1344 | 8043522 | PROM2      | -2.4819303 | -3.2188 | -0.92031 | 0.0225794 | prominin 2                                                           |
| 1345 | 8028016 | PROSER3    | -2.1161688 | -3.7446 | -0.65775 | 0.0477525 | proline and serine rich 3                                            |
| 1346 | 7955250 | PRPF40B    | -2.567586  | -3.0906 | -0.7019  | 0.0188384 | pre-mRNA processing factor 40 homolog B                              |
| 1347 | 7955810 | PRR13      | -2.3125748 | -3.467  | -0.548   | 0.0321087 | proline rich 13                                                      |
| 1348 | 8036808 | PRR13      | -2.1683352 | -3.6721 | -0.5223  | 0.0430304 | proline rich 13                                                      |
| 1349 | 8132031 | PRR15      | -3.0743397 | -2.3063 | -2.27941 | 0.0062398 | proline rich 15                                                      |
| 1350 | 8016387 | PRR15L     | -2.229923  | -3.5853 | -1.15935 | 0.0380061 | proline rich 15 like                                                 |
| 1351 | 8091037 | PRR23A///  | 2.2356252  | -3.5772 | 0.37792  | 0.0375693 | proline rich 23A///proline rich 23B                                  |
| 1352 | 8095451 | PRR27      | 2.9459963  | -2.5082 | 3.393026 | 0.0082924 | proline rich 27                                                      |
| 1353 | 8033455 | PRR36      | -3.976284  | -0.8745 | -0.98817 | 0.0008083 | proline rich 36                                                      |
| 1354 | 8107750 | PRRC1      | -2.5482724 | -3.1196 | -0.38879 | 0.019627  | proline rich coiled-coil 1                                           |
| 1355 | 8030393 | PRRG2      | -3.5203357 | -1.5976 | -0.91012 | 0.0022862 | proline rich and Gla domain 2                                        |
| 1356 | 7939150 | PRRG4      | -3.8267944 | -1.1105 | -1.21724 | 0.0011373 | proline rich and Gla domain 4                                        |
| 1357 | 8136807 | PRSS3P2/// | -2.9201365 | -2.5486 | -2.85581 | 0.0087786 | protease, serine 3 pseudogene 2///protease, serine 3///protease, ser |
| 1358 | 8161884 | PRUNE2     | 2.1044553  | -3.7608 | 0.792791 | 0.0488755 | prune homolog 2                                                      |
| 1359 | 8054769 | PS1TP4///  | -2.691253  | -2.9028 | -0.78363 | 0.0144562 | HBV preS1-transactivated protein 4///solute carrier family 35 membe  |
| 1360 | 8037246 | PSG6       | 2.7986671  | -2.7375 | 0.567701 | 0.011454  | pregnancy specific beta-1-glycoprotein 6                             |
| 1361 | 8088535 | PSMD6      | -3.2341936 | -2.0532 | -0.72564 | 0.0043644 | proteasome 26S subunit, non-ATPase 6                                 |
| 1362 | 7959322 | PSMD9      | -3.2363525 | -2.0498 | -0.76574 | 0.0043433 | proteasome 26S subunit, non-ATPase 9                                 |
| 1363 | 8118076 | PSORS1C1   | -3.0261127 | -2.3824 | -0.77909 | 0.0069456 | psoriasis susceptibility 1 candidate 1                               |
| 1364 | 8177938 | PSORS1C1   | -3.0261127 | -2.3824 | -0.77909 | 0.0069456 | psoriasis susceptibility 1 candidate 1                               |
| 1365 | 8106107 | PTCD2      | -3.0692749 | -2.3143 | -0.57742 | 0.0063105 | pentatricopeptide repeat domain 2                                    |
| 1366 | 8162533 | PTCH1      | 2.6210123  | -3.0098 | 1.31628  | 0.0168097 | patched 1                                                            |
| 1367 | 8166447 | PTCHD1     | 4.1330716  | -0.6288 | 2.281558 | 0.000565  | patched domain containing 1                                          |
| 1368 | 7926356 | PTER       | -2.8479085 | -2.6612 | -0.71319 | 0.0102865 | phosphotriesterase related                                           |
| 1369 | 8159521 | PTGDS      | 2.6910529  | -2.9031 | 1.417103 | 0.0144624 | prostaglandin D2 synthase                                            |
| 1370 | 7964250 | PTGES3     | -2.3531231 | -3.4083 | -0.46612 | 0.0295359 | prostaglandin E synthase 3                                           |
| 1371 | 7922976 | PTGS2      | 3.0528234  | -2.3403 | 3.597509 | 0.0065456 | prostaglandin-endoperoxide synthase 2                                |
| 1372 | 8047910 | PTH2R      | 2.1895227  | -3.6424 | 0.950149 | 0.0412372 | parathyroid hormone 2 receptor                                       |
| 1373 | 8145490 | PTK2B      | 2.7734374  | -2.7765 | 0.833227 | 0.0121003 | protein tyrosine kinase 2 beta                                       |
| 1374 | 8067662 | PTK6       | -2.1952259 | -3.6344 | -0.93235 | 0.0407663 | protein tyrosine kinase 6                                            |
| 1375 | 8119689 | PTK7       | 2.2339883  | -3.5795 | 0.965811 | 0.0376942 | protein tyrosine kinase 7 (inactive)                                 |
| 1376 | 7918657 | PTPN22     | 2.2384623  | -3.5732 | 1.10899  | 0.0373536 | protein tyrosine phosphatase, non-receptor type 22                   |
| 1377 | 8163149 | PTPN3      | -2.8790748 | -2.6127 | -0.78102 | 0.0096075 | protein tyrosine phosphatase, non-receptor type 3                    |
| 1378 | 7908553 | PTPRC      | 2.1036723  | -3.7619 | 1.059771 | 0.0489514 | protein tyrosine phosphatase, receptor type C                        |
| 1379 | 8001030 | PYCARD     | -3.3234369 | -1.9113 | -1.20133 | 0.0035702 | PYD and CARD domain containing                                       |
| 1380 | 7906386 | PYHIN1     | 2.2182783  | -3.6018 | 1.311132 | 0.0389128 | pyrin and HIN domain family member 1                                 |
| 1381 | 7963965 | PYM1       | -2.434101  | -3.2896 | -0.54976 | 0.0249612 | PYM homolog 1, exon junction complex associated factor               |
| 1382 | 8099541 | QDPR       | -2.4378163 | -3.2841 | -0.95963 | 0.0247681 | quinoid dihydropteridine reductase                                   |
| 1383 | 8116722 | QIQN5815   | 2.6510646  | -2.9641 | 0.471113 | 0.0157614 | uncharacterized LOC100129033                                         |
| 1384 | 8041508 | QPCT       | 2.8193175  | -2.7056 | 1.329513 | 0.0109497 | glutaminyl-peptide cyclotransferase                                  |
| 1385 | 7907830 | QSOX1      | 2.1574574  | -3.6873 | 0.988865 | 0.0439784 | quiescin sulfhydryl oxidase 1                                        |

|      |         |            |            |         |          |           |                                                                       |
|------|---------|------------|------------|---------|----------|-----------|-----------------------------------------------------------------------|
| 1386 | 8165094 | QSOX2      | 2.3955476  | -3.3463 | 0.880612 | 0.02705   | quiescin sulfhydryl oxidase 2                                         |
| 1387 | 7984289 | RAB11A     | -3.7493494 | -1.2333 | -0.57632 | 0.0013572 | RAB11A, member RAS oncogene family                                    |
| 1388 | 8052994 | RAB11FIP5  | -2.3949324 | -3.3472 | -0.44945 | 0.0270846 | RAB11 family interacting protein 5                                    |
| 1389 | 7963986 | RAB13      | -2.6342982 | -2.9896 | -0.52538 | 0.0163384 | RAB13, member RAS oncogene family                                     |
| 1390 | 7979663 | RAB15      | 2.1775359  | -3.6592 | 1.045211 | 0.0422431 | RAB15, member RAS oncogene family                                     |
| 1391 | 8136580 | RAB19      | -3.1320997 | -2.2151 | -0.82672 | 0.0054858 | RAB19, member RAS oncogene family                                     |
| 1392 | 7992518 | RAB26      | -2.7726964 | -2.7777 | -1.33226 | 0.0121198 | RAB26, member RAS oncogene family                                     |
| 1393 | 8021301 | RAB27B     | -2.8543596 | -2.6512 | -1.74813 | 0.0101423 | RAB27B, member RAS oncogene family                                    |
| 1394 | 8099395 | RAB28      | -2.4750816 | -3.2289 | -0.53921 | 0.0229069 | RAB28, member RAS oncogene family                                     |
| 1395 | 8009666 | RAB37      | 2.9871264  | -2.4437 | 0.70374  | 0.0075722 | RAB37, member RAS oncogene family                                     |
| 1396 | 7950899 | RAB38      | -2.2986285 | -3.4871 | -1.55893 | 0.0330405 | RAB38, member RAS oncogene family                                     |
| 1397 | 8176230 | RAB39B     | 3.3481034  | -1.872  | 1.001832 | 0.0033769 | RAB39B, member RAS oncogene family                                    |
| 1398 | 7957072 | RAB31P     | -2.5511794 | -3.1152 | -1.33818 | 0.0195064 | RAB3A interacting protein                                             |
| 1399 | 8169006 | RAB40AL    | -2.3159794 | -3.4621 | -0.58431 | 0.031885  | RAB40A, member RAS oncogene family-like                               |
| 1400 | 7956088 | RAB5B      | -2.4916646 | -3.2043 | -0.54491 | 0.0221216 | RAB5B, member RAS oncogene family                                     |
| 1401 | 8015545 | RAB5C      | -2.1069384 | -3.7574 | -0.42562 | 0.0486355 | RAB5C, member RAS oncogene family                                     |
| 1402 | 8180340 | RAB7B      | 4.1530092  | -0.5977 | 1.033745 | 0.0005399 | RAB7B, member RAS oncogene family                                     |
| 1403 | 7907492 | RABGAP1L   | 2.4632794  | -3.2465 | 0.886191 | 0.0234817 | RAB GTPase activating protein 1 like                                  |
| 1404 | 8089867 | RABL3      | -3.6999193 | -1.3118 | -0.75447 | 0.0015192 | RAB, member of RAS oncogene family like 3                             |
| 1405 | 8131406 | RAC1       | -2.8764051 | -2.6168 | -0.54261 | 0.009664  | ras-related C3 botulinum toxin substrate 1 (rho family, small GTP bir |
| 1406 | 8107942 | RAD50      | -2.9621338 | -2.4829 | -0.54025 | 0.0080022 | RAD50 double strand break repair protein                              |
| 1407 | 8008754 | RAD51C     | -2.257102  | -3.5466 | -0.61955 | 0.035965  | RAD51 paralog C                                                       |
| 1408 | 7907657 | RALGPS2    | -3.5686646 | -1.5206 | -1.13685 | 0.0020484 | Ral GEF with PH domain and SH3 binding motif 2                        |
| 1409 | 8164692 | RAPGEF1    | 2.5794406  | -3.0727 | 1.026222 | 0.0183692 | Rap guanine nucleotide exchange factor 1                              |
| 1410 | 8007084 | RARA///BC  | -2.9634885 | -2.4807 | -0.92036 | 0.0079783 | retinoic acid receptor alpha///BCL6 corepressor                       |
| 1411 | 7963631 | RARG///RA  | -3.0907773 | -2.2804 | -0.91428 | 0.0060155 | retinoic acid receptor gamma///retinoic acid receptor gamma           |
| 1412 | 8109802 | RARS       | -3.2163092 | -2.0816 | -0.64829 | 0.0045432 | arginyl-tRNA synthetase                                               |
| 1413 | 7972946 | RASA3      | 2.2463135  | -3.562  | 0.71559  | 0.0367628 | RAS p21 protein activator 3                                           |
| 1414 | 8035050 | RASAL3     | 2.7854985  | -2.7579 | 0.978177 | 0.0117871 | RAS protein activator like 3                                          |
| 1415 | 8161945 | RASEF      | -3.6455758 | -1.3982 | -1.41002 | 0.0017195 | RAS and EF-hand domain containing                                     |
| 1416 | 8116384 | RASGEF1C   | 3.018938   | -2.3937 | 0.665577 | 0.007057  | RasGEF domain family member 1C                                        |
| 1417 | 7949104 | RASGRP2    | 2.9769022  | -2.4597 | 2.330201 | 0.0077453 | RAS guanyl releasing protein 2                                        |
| 1418 | 8041422 | RASGRP3    | 2.3280058  | -3.4447 | 0.771079 | 0.0311061 | RAS guanyl releasing protein 3                                        |
| 1419 | 8075211 | RASL10A    | 2.2313783  | -3.5832 | 0.474595 | 0.0378942 | RAS like family 10 member A                                           |
| 1420 | 7909214 | RASSF5     | 2.2017681  | -3.6251 | 0.86948  | 0.0402322 | Ras association domain family member 5                                |
| 1421 | 7902023 | RAVER2     | 2.3581717  | -3.4009 | 1.0311   | 0.0292293 | ribonucleoprotein, PTB binding 2                                      |
| 1422 | 8023549 | RAX        | 2.4867801  | -3.2116 | 0.520342 | 0.0223502 | retina and anterior neural fold homeobox                              |
| 1423 | 8060353 | RBCK1      | -3.3916381 | -1.8027 | -0.97118 | 0.0030605 | RANBP2-type and C3HC4-type zinc finger containing 1                   |
| 1424 | 8163948 | RBM18      | -2.3374823 | -3.431  | -0.59761 | 0.0305048 | RNA binding motif protein 18                                          |
| 1425 | 8117045 | RBM24      | -2.7226706 | -2.8547 | -3.61665 | 0.0135081 | RNA binding motif protein 24                                          |
| 1426 | 8063583 | RBM38      | 3.7032433  | -1.3065 | 0.764161 | 0.0015077 | RNA binding motif protein 38                                          |
| 1427 | 8046628 | RBM45      | -2.3497618 | -3.4132 | -0.44993 | 0.0297417 | RNA binding motif protein 45                                          |
| 1428 | 8169463 | RBMXL3     | 2.608262   | -3.0291 | 1.218281 | 0.0172742 | RNA binding motif protein, X-linked like 3                            |
| 1429 | 8073334 | RBX1       | -2.5538635 | -3.1112 | -0.56141 | 0.0193956 | ring-box 1                                                            |
| 1430 | 8101013 | RCHY1      | -2.096291  | -3.772  | -0.64346 | 0.0496723 | ring finger and CHY zinc finger domain containing 1                   |
| 1431 | 7949021 | RCOR2      | 2.5955664  | -3.0483 | 1.870953 | 0.0177487 | REST corepressor 2                                                    |
| 1432 | 7909529 | RCOR3      | -2.1007857 | -3.7658 | -0.53197 | 0.0492322 | REST corepressor 3                                                    |
| 1433 | 7907079 | RCS1       | 4.2426026  | -0.4585 | 1.654244 | 0.00044   | RCS1 domain containing 1                                              |
| 1434 | 8053551 | REEP1      | -2.1822023 | -3.6527 | -1.21475 | 0.0418489 | receptor accessory protein 1                                          |
| 1435 | 7927799 | REEP3      | -2.4476512 | -3.2696 | -0.65928 | 0.0242636 | receptor accessory protein 3                                          |
| 1436 | 8053337 | REG1C      | -2.1330887 | -3.7212 | -2.87829 | 0.0461717 | regenerating family member 1 gamma, pseudogene                        |
| 1437 | 8166243 | REPS2      | -2.2452747 | -3.5635 | -1.20052 | 0.0368405 | RALBP1 associated Eps domain containing 2                             |
| 1438 | 7961595 | REGL       | 2.3269736  | -3.4462 | 1.896016 | 0.0311723 | RERG like                                                             |
| 1439 | 8095262 | REST       | -2.2837304 | -3.5085 | -0.45483 | 0.0340635 | RE1 silencing transcription factor                                    |
| 1440 | 7927120 | RET///RET/ | -2.6271984 | -3.0004 | -4.24049 | 0.0165887 | ret proto-oncogene///ret proto-oncogene///kinesin family member 1     |
| 1441 | 8054227 | REV1       | -2.2749407 | -3.5211 | -0.43806 | 0.0346806 | REV1, DNA directed polymerase                                         |
| 1442 | 7968789 | RGCC       | 2.284159   | -3.5079 | 0.916026 | 0.0340337 | regulator of cell cycle                                               |
| 1443 | 7991459 | RGMA       | 2.6295144  | -2.9969 | 0.751962 | 0.0165066 | repulsive guidance molecule family member a                           |
| 1444 | 8107100 | RGMB       | -2.3495568 | -3.4135 | -0.60838 | 0.0297543 | repulsive guidance molecule family member b                           |
| 1445 | 8155110 | RGP1       | -2.3013595 | -3.4832 | -0.39936 | 0.0328561 | RGP1 homolog, RAB6A GEF complex partner 1                             |
| 1446 | 7908388 | RGS1       | 2.1978142  | -3.6307 | 0.932697 | 0.0405543 | regulator of G-protein signaling 1                                    |
| 1447 | 7908409 | RGS2       | 3.5981973  | -1.4736 | 1.57169  | 0.0019153 | regulator of G-protein signaling 2                                    |
| 1448 | 7908382 | RGS21      | 2.8055513  | -2.7269 | 1.297533 | 0.0112834 | regulator of G-protein signaling 21                                   |
| 1449 | 8126878 | RHAG       | 3.5304624  | -1.5815 | 0.826722 | 0.0022342 | Rh-associated glycoprotein                                            |
| 1450 | 8087409 | RHOA       | -2.4444782 | -3.2743 | -0.37191 | 0.0244253 | ras homolog family member A                                           |
| 1451 | 8040473 | RHOB       | -2.5923626 | -3.0532 | -0.84932 | 0.0178704 | ras homolog family member B                                           |
| 1452 | 7967202 | RHOF       | 2.938242   | -2.5203 | 1.05693  | 0.0084354 | ras homolog family member F, filopodia associated                     |
| 1453 | 8035980 | RHPN2      | -2.7386377 | -2.8301 | -1.13934 | 0.0130493 | rhopilin Rho GTPase binding protein 2                                 |
| 1454 | 8073766 | RIBC2      | -3.3610642 | -1.8514 | -1.85915 | 0.0032795 | RIB43A domain with coiled-coils 2                                     |
| 1455 | 7967456 | RILPL2     | -2.2644853 | -3.5361 | -0.55599 | 0.0354282 | Rab interacting lysosomal protein like 2                              |
| 1456 | 8074771 | RIMBP3B//  | 2.5961308  | -3.0475 | 0.582028 | 0.0177273 | RIMS binding protein 3B///RIMS binding protein 3C///RIMS binding      |
| 1457 | 8074593 | RIMBP3B//  | 2.3440652  | -3.4214 | 0.568687 | 0.0300935 | RIMS binding protein 3B///RIMS binding protein 3C///RIMS binding      |
| 1458 | 7900540 | RIMKLA     | -2.6498944 | -2.9659 | -2.53088 | 0.015801  | ribosomal modification protein rimK like family member A              |

|      |         |           |            |         |          |           |                                                                     |
|------|---------|-----------|------------|---------|----------|-----------|---------------------------------------------------------------------|
| 1459 | 7987536 | RMDN3     | -2.1167762 | -3.7438 | -0.41429 | 0.0476949 | regulator of microtubule dynamics 3                                 |
| 1460 | 8130191 | RMND1     | -2.6074873 | -3.0303 | -1.0669  | 0.0173028 | required for meiotic nuclear division 1 homolog                     |
| 1461 | 8110437 | RMND5B    | -4.3145854 | -0.3473 | -0.89289 | 0.0003735 | required for meiotic nuclear division 5 homolog B                   |
| 1462 | 7962884 | RND1      | -2.2951336 | -3.4922 | -1.94409 | 0.0332779 | Rho family GTPase 1                                                 |
| 1463 | 8053576 | RNF103    | -2.9684692 | -2.4729 | -0.7247  | 0.007891  | ring finger protein 103                                             |
| 1464 | 8053562 | RNF103-CI | -2.2840804 | -3.508  | -0.37535 | 0.0340391 | RNF103-CHMP3 readthrough///charged multivesicular body protein      |
| 1465 | 8150186 | RNF122    | 2.6685588  | -2.9375 | 0.718234 | 0.01518   | ring finger protein 122                                             |
| 1466 | 8169174 | RNF128    | -2.7853978 | -2.758  | -2.09903 | 0.0117897 | ring finger protein 128, E3 ubiquitin protein ligase                |
| 1467 | 8040090 | RNF144A   | 2.9308182  | -2.5319 | 1.018399 | 0.0085745 | ring finger protein 144A                                            |
| 1468 | 8043209 | RNF181    | -2.2523346 | -3.5534 | -0.5112  | 0.0363155 | ring finger protein 181                                             |
| 1469 | 7964021 | RNF41     | -3.0514125 | -2.3425 | -0.63443 | 0.0065662 | ring finger protein 41                                              |
| 1470 | 7945420 | RNH1      | -2.6850982 | -2.9122 | -0.58676 | 0.0146492 | ribonuclease/angiogenesis inhibitor 1                               |
| 1471 | 7908779 | RNPEP     | -3.2093877 | -2.0926 | -0.69905 | 0.0046143 | arginyl aminopeptidase                                              |
| 1472 | 8081001 | ROBO2     | -2.7048774 | -2.8819 | -3.73154 | 0.0140375 | roundabout guidance receptor 2                                      |
| 1473 | 7901969 | ROR1      | 2.5851904  | -3.064  | 1.255125 | 0.0181456 | receptor tyrosine kinase like orphan receptor 1                     |
| 1474 | 7920082 | RORC      | -3.3982136 | -1.7922 | -1.71363 | 0.0030153 | RAR related orphan receptor C                                       |
| 1475 | 8168723 | RPA4      | 2.4907623  | -3.2056 | 0.654213 | 0.0221636 | replication protein A4                                              |
| 1476 | 7958860 | RPH3A     | 2.5378106  | -3.1353 | 0.601567 | 0.0200671 | rabphilin 3A                                                        |
| 1477 | 7936320 | RPL13AP6  | 2.1829362  | -3.6516 | 0.404559 | 0.0417872 | ribosomal protein L13a pseudogene 6                                 |
| 1478 | 8092067 | RPL22L1   | 2.2549066  | -3.5498 | 0.630163 | 0.036126  | ribosomal protein L22 like 1                                        |
| 1479 | 8127526 | RPL39P5// | 2.1828685  | -3.6517 | 0.492895 | 0.0417929 | ribosomal protein L39 pseudogene 5///zinc finger protein 525///ribc |
| 1480 | 8174710 | RPL39P5// | 2.1828685  | -3.6517 | 0.492895 | 0.0417929 | ribosomal protein L39 pseudogene 5///zinc finger protein 525///ribc |
| 1481 | 8022914 | RPRD1A    | -3.1870933 | -2.128  | -0.59675 | 0.0048508 | regulation of nuclear pre-mRNA domain containing 1A                 |
| 1482 | 7908692 | RPS10P7   | -2.3955921 | -3.3463 | -0.48233 | 0.0270474 | ribosomal protein S10 pseudogene 7                                  |
| 1483 | 8118644 | RPS18P9// | 2.319442   | -3.4571 | 0.462254 | 0.0316589 | ribosomal protein S18 pseudogene 9///ribosomal protein S18          |
| 1484 | 8178253 | RPS18P9// | 2.319442   | -3.4571 | 0.462254 | 0.0316589 | ribosomal protein S18 pseudogene 9///ribosomal protein S18          |
| 1485 | 8179544 | RPS18P9// | 2.319442   | -3.4571 | 0.462254 | 0.0316589 | ribosomal protein S18 pseudogene 9///ribosomal protein S18          |
| 1486 | 7909661 | RPS6KC1   | -2.2256168 | -3.5914 | -0.48192 | 0.0383391 | ribosomal protein S6 kinase C1                                      |
| 1487 | 8078905 | RPSAP36// | 2.1882333  | -3.6442 | 0.539654 | 0.0413444 | ribosomal protein SA pseudogene 36///ribosomal protein SA pseud     |
| 1488 | 8027354 | RPSAP58   | -2.4310594 | -3.2941 | -0.80372 | 0.0251204 | ribosomal protein SA pseudogene 58                                  |
| 1489 | 8038407 | RRAS      | -3.0579812 | -2.3322 | -0.88373 | 0.006471  | related RAS viral (r-ras) oncogene homolog                          |
| 1490 | 7906223 | RRNAD1    | -3.0344539 | -2.3692 | -0.61006 | 0.0068182 | ribosomal RNA adenine dimethylase domain containing 1               |
| 1491 | 8130528 | RSPH3     | -2.4168145 | -3.3151 | -0.51741 | 0.0258784 | radial spoke 3 homolog                                              |
| 1492 | 8052204 | RTN4      | -2.2072429 | -3.6174 | -0.45158 | 0.0397902 | reticulon 4                                                         |
| 1493 | 8011214 | RTN4RL1   | -2.3290483 | -3.4432 | -1.17498 | 0.0310394 | reticulon 4 receptor like 1                                         |
| 1494 | 8049952 | RTP5      | 2.1091515  | -3.7543 | 0.38627  | 0.0484224 | receptor transporter protein 5 (putative)                           |
| 1495 | 8007435 | RUNDC1    | -2.3637162 | -3.3928 | -0.54201 | 0.028896  | RUN domain containing 1                                             |
| 1496 | 8007607 | RUNDC3A   | 2.329719   | -3.4422 | 0.519455 | 0.0309966 | RUN domain containing 3A                                            |
| 1497 | 8121613 | RWDD1     | -2.8377037 | -2.677  | -0.56921 | 0.0105186 | RWD domain containing 1                                             |
| 1498 | 8088820 | RYBP      | -2.2110068 | -3.6121 | -0.47825 | 0.0394889 | RING1 and YY1 binding protein                                       |
| 1499 | 7982392 | RYR3      | 2.1481482  | -3.7003 | 1.607494 | 0.0448048 | ryanodine receptor 3                                                |
| 1500 | 7920303 | S100A13   | -2.6494818 | -2.9666 | -1.00606 | 0.015815  | S100 calcium binding protein A13                                    |
| 1501 | 7920297 | S100A14   | -3.8117144 | -1.1344 | -2.43194 | 0.0011772 | S100 calcium binding protein A14                                    |
| 1502 | 7920291 | S100A16   | -2.4523788 | -3.2626 | -1.26473 | 0.0240246 | S100 calcium binding protein A16                                    |
| 1503 | 7903393 | S1PR1     | 2.3117248  | -3.4683 | 1.016754 | 0.0321648 | sphingosine-1-phosphate receptor 1                                  |
| 1504 | 8067792 | SAMD10    | 2.8559231  | -2.6487 | 0.614511 | 0.0101076 | sterile alpha motif domain containing 10                            |
| 1505 | 8152506 | SAMD12    | -2.1698841 | -3.6699 | -0.91409 | 0.0428969 | sterile alpha motif domain containing 12                            |
| 1506 | 8129482 | SAMD3     | 2.2140274  | -3.6078 | 1.088794 | 0.0392486 | sterile alpha motif domain containing 3                             |
| 1507 | 7967976 | SAP18     | -2.8427289 | -2.6692 | -0.49325 | 0.0104037 | Sin3A associated protein 18                                         |
| 1508 | 8169859 | SASH3     | 2.8663389  | -2.6325 | 0.826544 | 0.0098796 | SAM and SH3 domain containing 3                                     |
| 1509 | 8085716 | SATB1     | 2.307504   | -3.4743 | 1.425171 | 0.0324447 | SATB homeobox 1                                                     |
| 1510 | 8106479 | SCAMP1    | -2.1164867 | -3.7442 | -0.43706 | 0.0477224 | secretory carrier membrane protein 1                                |
| 1511 | 8021181 | SCARNA17  | 2.3593475  | -3.3992 | 0.408728 | 0.0291584 | small Cajal body-specific RNA 17                                    |
| 1512 | 7911155 | SCCPDH    | -3.4200768 | -1.7574 | -1.33559 | 0.0028698 | saccharopine dehydrogenase (putative)                               |
| 1513 | 7981718 | SCFV//IGF | 2.223743   | -3.5941 | 1.706866 | 0.0384848 | single-chain Fv fragment///immunoglobulin heavy constant mu///sin   |
| 1514 | 7981740 | SCFV//IGL | 2.1357696  | -3.7175 | 1.763732 | 0.0459256 | single-chain Fv fragment///immunoglobulin lambda joining 3///imm    |
| 1515 | 7981724 | SCFV//IGL | 2.2706227  | -3.5273 | 1.76642  | 0.0349876 | single-chain Fv fragment///immunoglobulin lambda joining 3///imm    |
| 1516 | 7995263 | SCFV//IGL | 2.1662799  | -3.675  | 1.73316  | 0.0432081 | single-chain Fv fragment///immunoglobulin lambda joining 3///imm    |
| 1517 | 8059345 | SCG2      | 2.4670928  | -3.2408 | 0.898211 | 0.0232945 | secretogranin II                                                    |
| 1518 | 8131550 | SCIN      | -2.5688768 | -3.0886 | -1.878   | 0.0187867 | scinderin                                                           |
| 1519 | 8128638 | SCML4     | 2.1066506  | -3.7578 | 0.984274 | 0.0486632 | sex comb on midleg-like 4 (Drosophila)                              |
| 1520 | 8046020 | SCN2A     | 2.1031629  | -3.7626 | 1.541865 | 0.0490009 | sodium voltage-gated channel alpha subunit 2                        |
| 1521 | 7955533 | SCN8A     | -2.2369942 | -3.5753 | -1.49752 | 0.0374651 | sodium voltage-gated channel alpha subunit 8                        |
| 1522 | 7960529 | SCNN1A    | -4.3374064 | -0.3121 | -2.24939 | 0.0003545 | sodium channel epithelial 1 alpha subunit                           |
| 1523 | 8097521 | SCOC      | -2.8183145 | -2.7071 | -0.75131 | 0.0109737 | short coiled-coil protein                                           |
| 1524 | 8046502 | SCRN3     | -3.0465091 | -2.3502 | -0.67305 | 0.0066381 | secernin 3                                                          |
| 1525 | 8148796 | SCX       | 2.1548988  | -3.6909 | 0.555642 | 0.0442042 | scleraxis bHLH transcription factor                                 |
| 1526 | 8148821 | SCX       | 2.1548988  | -3.6909 | 0.555642 | 0.0442042 | scleraxis bHLH transcription factor                                 |
| 1527 | 8071559 | SDF2L1    | 2.8179013  | -2.7078 | 0.516445 | 0.0109836 | stromal cell derived factor 2 like 1                                |
| 1528 | 8134415 | SDHAF3    | -2.2194826 | -3.6001 | -0.94109 | 0.0388181 | succinate dehydrogenase complex assembly factor 3                   |
| 1529 | 7912928 | SDHB      | -2.4164502 | -3.3156 | -0.60323 | 0.0258981 | succinate dehydrogenase complex iron sulfur subunit B               |
| 1530 | 8011212 | SDHC      | -2.1593969 | -3.6846 | -0.44044 | 0.043808  | succinate dehydrogenase complex subunit C                           |
| 1531 | 8150889 | SDR16C5   | -3.7628149 | -1.2119 | -4.91753 | 0.0013162 | short chain dehydrogenase/reductase family 16C, member 5            |

|      |         |           |            |         |          |           |                                                           |
|------|---------|-----------|------------|---------|----------|-----------|-----------------------------------------------------------|
| 1532 | 7964285 | SDR9C7    | 2.1933872  | -3.6369 | 0.673367 | 0.0409176 | short chain dehydrogenase/reductase family 9C, member 7   |
| 1533 | 8021453 | SEC11C    | 2.2880618  | -3.5023 | 0.775829 | 0.0337631 | SEC11 homolog C, signal peptidase complex subunit         |
| 1534 | 8099721 | SEL1L3    | 2.5760233  | -3.0778 | 1.24023  | 0.0185033 | SEL1L family member 3                                     |
| 1535 | 7922229 | SELE      | 3.2231586  | -2.0707 | 1.329174 | 0.0044739 | selectin E                                                |
| 1536 | 7922219 | SELL      | 3.4424907  | -1.7217 | 2.016261 | 0.0027277 | selectin L                                                |
| 1537 | 8079966 | SEMA3B    | -2.7789546 | -2.768  | -2.00552 | 0.0119561 | semaphorin 3B                                             |
| 1538 | 8140534 | SEMA3C    | -4.2576623 | -0.4352 | -1.60749 | 0.0004252 | semaphorin 3C                                             |
| 1539 | 8140650 | SEMA3E    | -3.5007605 | -1.6288 | -1.86655 | 0.0023901 | semaphorin 3E                                             |
| 1540 | 8079896 | SEMA3F    | -2.5259205 | -3.1531 | -1.12476 | 0.0205786 | semaphorin 3F                                             |
| 1541 | 7984626 | SENP8     | -2.2922652 | -3.4963 | -0.62674 | 0.0334739 | SUMO/sentrin peptidase family member, NEDD8 specific      |
| 1542 | 8000869 | SEPT1     | 2.8674736  | -2.6308 | 1.258511 | 0.0098551 | septin 1                                                  |
| 1543 | 8054467 | SEPT10    | -3.0214532 | -2.3897 | -0.7379  | 0.0070178 | septin 10                                                 |
| 1544 | 8049827 | SEPT2     | -2.4377541 | -3.2842 | -0.39169 | 0.0247713 | septin 2                                                  |
| 1545 | 8174692 | SEPT6     | 2.7480786  | -2.8156 | 1.005141 | 0.012785  | septin 6                                                  |
| 1546 | 8129317 | SERINC1   | -2.201682  | -3.6253 | -0.55809 | 0.0402392 | serine incorporator 1                                     |
| 1547 | 7899615 | SERINC2   | -2.3973164 | -3.3437 | -1.02247 | 0.0269507 | serine incorporator 2                                     |
| 1548 | 8123621 | SERPINB6  | -3.5671166 | -1.5231 | -0.75101 | 0.0020556 | serpin family B member 6                                  |
| 1549 | 8123609 | SERPINB9  | 2.1526992  | -3.6939 | 0.807461 | 0.0443991 | serpin family B member 9                                  |
| 1550 | 8071420 | SERPIND1  | 2.7068273  | -2.879  | 0.59831  | 0.0139785 | serpin family D member 1                                  |
| 1551 | 7931951 | SFMBT2    | 2.4004965  | -3.3391 | 1.022892 | 0.026773  | Scm-like with four mbt domains 2                          |
| 1552 | 7899265 | SFN       | -3.1700082 | -2.155  | -1.76619 | 0.00504   | stratifin                                                 |
| 1553 | 8150428 | SFRP1     | 2.6291151  | -2.9975 | 2.784663 | 0.0165207 | secreted frizzled related protein 1                       |
| 1554 | 7935528 | SFRP5     | 2.6532153  | -2.9609 | 0.537484 | 0.0156888 | secreted frizzled related protein 5                       |
| 1555 | 7907135 | SFT2D2    | 2.9658304  | -2.4771 | 0.84328  | 0.0079372 | SFT2 domain containing 2                                  |
| 1556 | 8129677 | SGK1      | 2.2170739  | -3.6035 | 0.76625  | 0.0390077 | serum/glucocorticoid regulated kinase 1                   |
| 1557 | 7928171 | SGPL1     | -2.0976897 | -3.7701 | -0.44816 | 0.049535  | sphingosine-1-phosphate lyase 1                           |
| 1558 | 8135149 | SH2B2     | 2.3250826  | -3.4489 | 1.230318 | 0.0312938 | SH2B adaptor protein 2                                    |
| 1559 | 8169792 | SH2D1A    | 2.741732   | -2.8254 | 1.763305 | 0.0129621 | SH2 domain containing 1A                                  |
| 1560 | 7921144 | SH2D2A    | 2.5021833  | -3.1886 | 0.560314 | 0.0216366 | SH2 domain containing 2A                                  |
| 1561 | 8164252 | SH2D3C    | 2.1683251  | -3.6721 | 0.790999 | 0.0430313 | SH2 domain containing 3C                                  |
| 1562 | 8072847 | SH3BP1    | 3.8763114  | -1.0322 | 1.291875 | 0.0010157 | SH3 domain binding protein 1                              |
| 1563 | 8085556 | SH3BP5    | 2.5507477  | -3.1159 | 0.967916 | 0.0195242 | SH3 domain binding protein 5                              |
| 1564 | 8171684 | SH3KBP1   | 2.2342086  | -3.5792 | 0.912899 | 0.0376774 | SH3 domain containing kinase binding protein 1            |
| 1565 | 7988563 | SHC4      | 2.4221728  | -3.3072 | 1.69665  | 0.0255908 | SHC adaptor protein 4                                     |
| 1566 | 8114068 | SHROOM1   | -2.7574811 | -2.8011 | -0.82238 | 0.0125269 | shroom family member 1                                    |
| 1567 | 8095834 | SHROOM3   | -2.1760002 | -3.6614 | -0.85781 | 0.0423736 | shroom family member 3                                    |
| 1568 | 8030563 | SIGLEC16  | -3.6627958 | -1.3708 | -0.68381 | 0.0016533 | sialic acid binding Ig like lectin 16 (gene/pseudogene)   |
| 1569 | 7990487 | SIN3A     | -2.9958947 | -2.4299 | -0.61878 | 0.0074266 | SIN3 transcription regulator family member A              |
| 1570 | 8064485 | SIRPG     | 2.2993145  | -3.4861 | 0.99961  | 0.0329941 | signal regulatory protein gamma                           |
| 1571 | 8032770 | SIRT6     | -2.478924  | -3.2232 | -0.5242  | 0.0227226 | sirtuin 6                                                 |
| 1572 | 8161017 | SIT1      | 2.7138466  | -2.8682 | 1.161844 | 0.0137682 | signaling threshold regulating transmembrane adaptor 1    |
| 1573 | 8180312 | SKP1      | -2.5025987 | -3.188  | -0.52443 | 0.0216176 | S-phase kinase-associated protein 1                       |
| 1574 | 8152988 | SLA       | 2.119974   | -3.7394 | 0.875039 | 0.0473928 | Src-like-adaptor                                          |
| 1575 | 8066038 | SLA2      | 2.2434516  | -3.5661 | 1.051698 | 0.0369772 | Src like adaptor 2                                        |
| 1576 | 7921652 | SLAMF1    | 2.3882894  | -3.357  | 1.470424 | 0.027461  | signaling lymphocytic activation molecule family member 1 |
| 1577 | 7921625 | SLAMF6    | 2.1071438  | -3.7571 | 1.097321 | 0.0486157 | SLAM family member 6                                      |
| 1578 | 7906613 | SLAMF7    | 2.1913215  | -3.6398 | 1.304383 | 0.0410882 | SLAM family member 7                                      |
| 1579 | 8151559 | SLC10A5   | -3.6298472 | -1.4232 | -1.39724 | 0.0017822 | solute carrier family 10 member 5                         |
| 1580 | 7963212 | SLC11A2   | -2.9719891 | -2.4674 | -0.67491 | 0.0078299 | solute carrier family 11 member 2                         |
| 1581 | 8142628 | SLC13A1   | 2.1286296  | -3.7274 | 0.381936 | 0.0465836 | solute carrier family 13 member 1                         |
| 1582 | 8009746 | SLC16A5   | -2.8420101 | -2.6703 | -1.08806 | 0.0104201 | solute carrier family 16 member 5                         |
| 1583 | 8017843 | SLC16A6   | -2.094879  | -3.774  | -1.4421  | 0.0498113 | solute carrier family 16 member 6                         |
| 1584 | 8154135 | SLC1A1    | -2.8705575 | -2.626  | -1.81638 | 0.0097887 | solute carrier family 1 member 1                          |
| 1585 | 7904226 | SLC22A15  | -2.2332518 | -3.5806 | -0.89702 | 0.0377505 | solute carrier family 22 member 15                        |
| 1586 | 7937852 | SLC22A18  | -2.0952049 | -3.7735 | -0.77915 | 0.0497792 | solute carrier family 22 member 18                        |
| 1587 | 8123658 | SLC22A23  | -2.3495223 | -3.4135 | -0.8536  | 0.0297564 | solute carrier family 22 member 23                        |
| 1588 | 8071107 | SLC25A18  | 2.2501216  | -3.5566 | 1.266692 | 0.0364794 | solute carrier family 25 member 18                        |
| 1589 | 7918188 | SLC25A24  | -3.2600777 | -2.0121 | -0.76926 | 0.0041177 | solute carrier family 25 member 24                        |
| 1590 | 8120460 | SLC25A51F | -2.3317755 | -3.4393 | -1.00846 | 0.0308656 | solute carrier family 25 member 51 pseudogene 1           |
| 1591 | 8174288 | SLC25A53  | 2.3959757  | -3.3457 | 0.381234 | 0.0270259 | solute carrier family 25 member 53                        |
| 1592 | 8174675 | SLC25A5-A | 2.2809494  | -3.5125 | 0.602229 | 0.0342576 | SLC25A5 antisense RNA 1                                   |
| 1593 | 7956573 | SLC26A10  | 3.4112828  | -1.7714 | 0.923417 | 0.0029275 | solute carrier family 26 member 10                        |
| 1594 | 8141922 | SLC26A5   | -2.1181324 | -3.7419 | -3.14886 | 0.0475666 | solute carrier family 26 member 5                         |
| 1595 | 7983650 | SLC27A2   | -3.4209121 | -1.7561 | -2.87495 | 0.0028643 | solute carrier family 27 member 2                         |
| 1596 | 8063177 | SLC2A10   | -2.8824505 | -2.6074 | -1.30765 | 0.0095366 | solute carrier family 2 member 10                         |
| 1597 | 7960850 | SLC2A14   | 3.149104   | -2.1882 | 0.761133 | 0.0052812 | solute carrier family 2 member 14                         |
| 1598 | 7960865 | SLC2A3    | 2.8999287  | -2.5802 | 0.836512 | 0.0091775 | solute carrier family 2 member 3                          |
| 1599 | 7924342 | SLC30A10  | 2.5580713  | -3.1049 | 0.449697 | 0.0192231 | solute carrier family 30 member 10                        |
| 1600 | 8105801 | SLC30A5   | -2.6947457 | -2.8975 | -0.50467 | 0.0143477 | solute carrier family 30 member 5                         |
| 1601 | 7903281 | SLC35A3   | -2.5489884 | -3.1185 | -0.67878 | 0.0195972 | solute carrier family 35 member A3                        |
| 1602 | 8054771 | SLC35F5   | -2.2565533 | -3.5474 | -0.70427 | 0.0360052 | solute carrier family 35 member F5                        |
| 1603 | 7962537 | SLC38A2   | -2.5851218 | -3.0641 | -0.63937 | 0.0181483 | solute carrier family 38 member 2                         |
| 1604 | 8022927 | SLC39A6   | -2.6486744 | -2.9678 | -1.63293 | 0.0158424 | solute carrier family 39 member 6                         |

|      |                   |            |         |          |           |                                                                      |
|------|-------------------|------------|---------|----------|-----------|----------------------------------------------------------------------|
| 1605 | 7975344 SLC39A9   | -2.2636972 | -3.5372 | -0.65099 | 0.0354851 | solute carrier family 39 member 9                                    |
| 1606 | 8157038 SLC44A1   | -2.5282749 | -3.1496 | -0.68769 | 0.0204763 | solute carrier family 44 member 1                                    |
| 1607 | 8125149 SLC44A4   | -4.0000128 | -0.8372 | -3.24691 | 0.0007657 | solute carrier family 44 member 4                                    |
| 1608 | 8178653 SLC44A4   | -4.0000128 | -0.8372 | -3.24691 | 0.0007657 | solute carrier family 44 member 4                                    |
| 1609 | 8179861 SLC44A4   | -4.0000128 | -0.8372 | -3.24691 | 0.0007657 | solute carrier family 44 member 4                                    |
| 1610 | 7917052 SLC44A5   | -3.181235  | -2.1372 | -2.12546 | 0.0049148 | solute carrier family 44 member 5                                    |
| 1611 | 8104281 SLC6A18   | 2.4957208  | -3.1982 | 0.449807 | 0.0219333 | solute carrier family 6 member 18                                    |
| 1612 | 8086540 SLC6A20   | 2.2629108  | -3.5383 | 0.555307 | 0.035542  | solute carrier family 6 member 20                                    |
| 1613 | 8151637 SLC7A13   | -2.4516272 | -3.2637 | -3.20339 | 0.0240624 | solute carrier family 7 member 13                                    |
| 1614 | 7977933 SLC7A8    | -2.1672617 | -3.6736 | -1.2809  | 0.0431231 | solute carrier family 7 member 8                                     |
| 1615 | 8009685 SLC9A3R1  | -2.1289697 | -3.7269 | -0.96791 | 0.0465521 | SLC9A3 regulator 1                                                   |
| 1616 | 8151223 SLCO5A1   | 3.5564859  | -1.54   | 1.902395 | 0.0021059 | solute carrier organic anion transporter family member 5A1           |
| 1617 | 7969569 SLITRK5   | 2.7201082  | -2.8586 | 1.501067 | 0.0135831 | SLIT and NTRK like family member 5                                   |
| 1618 | 8080685 SLMAP     | -2.292467  | -3.496  | -0.36601 | 0.0334601 | sarcolemma associated protein                                        |
| 1619 | 8174985 SMARCA1   | -2.3690568 | -3.3851 | -0.88714 | 0.0285784 | SWI/SNF related, matrix associated, actin dependent regulator of chi |
| 1620 | 8050443 SMC6      | 2.1303535  | -3.725  | 0.581978 | 0.046424  | structural maintenance of chromosomes 6                              |
| 1621 | 8019877 SMCHD1    | 2.6243607  | -3.0047 | 0.558404 | 0.0166897 | structural maintenance of chromosomes flexible hinge domain cont     |
| 1622 | 8099912 SMIM14    | -3.1541425 | -2.1802 | -1.48677 | 0.0052221 | small integral membrane protein 14                                   |
| 1623 | 8112302 SMIM15    | -2.4555058 | -3.258  | -0.40076 | 0.0238676 | small integral membrane protein 15                                   |
| 1624 | 8136080 SMO       | 2.4953552  | -3.1988 | 0.776403 | 0.0219502 | smoothed, frizzled class receptor                                    |
| 1625 | 7975390 SMOC1     | 2.5152369  | -3.1691 | 0.942074 | 0.0210486 | SPARC related modular calcium binding 1                              |
| 1626 | 7963741 SMUG1     | -3.8965577 | -1.0002 | -0.93827 | 0.0009698 | single-strand-selective monofunctional uracil-DNA glycosylase 1      |
| 1627 | 7994926 SNORA30   | -2.1988307 | -3.6293 | -0.52288 | 0.0404712 | small nucleolar RNA, H/ACA box 30                                    |
| 1628 | 8078918 SNORA62   | 2.2040143  | -3.622  | 0.91383  | 0.0400504 | small nucleolar RNA, H/ACA box 62                                    |
| 1629 | 8090565 SNORA7B   | 2.3295527  | -3.4425 | 0.45265  | 0.0310072 | small nucleolar RNA, H/ACA box 7B                                    |
| 1630 | 7982014 SNORD115  | 2.2341954  | -3.5792 | 3.594201 | 0.0376784 | small nucleolar RNA, C/D box 115-4                                   |
| 1631 | 8146403 SNTG1     | 2.5845679  | -3.065  | 1.204408 | 0.0181697 | syntrophin gamma 1                                                   |
| 1632 | 7984174 SNX22     | 2.787554   | -2.7547 | 0.824585 | 0.0117345 | sorting nexin 22                                                     |
| 1633 | 7993825 SNX29P1// | 2.3688937  | -3.3853 | 0.727927 | 0.028588  | sorting nexin 29 pseudogene 1///sorting nexin 29 pseudogene 2///s    |
| 1634 | 7994576 SNX29P1// | 2.2317275  | -3.5828 | 0.671809 | 0.0378674 | sorting nexin 29 pseudogene 1///sorting nexin 29 pseudogene 2///s    |
| 1635 | 7903203 SNX7      | -4.1465416 | -0.6078 | -1.13292 | 0.0005479 | sorting nexin 7                                                      |
| 1636 | 7907702 SOAT1     | 2.9076863  | -2.5681 | 0.958192 | 0.0090224 | sterol O-acyltransferase 1                                           |
| 1637 | 8121319 SOBP      | 2.1874815  | -3.6452 | 2.203522 | 0.0414069 | sine oculis binding protein homolog                                  |
| 1638 | 8021707 SOCS6     | -2.8651286 | -2.6344 | -0.65006 | 0.0099059 | suppressor of cytokine signaling 6                                   |
| 1639 | 8165038 SOHLH1    | 2.0967538  | -3.7714 | 0.416851 | 0.0496269 | spermatogenesis and oogenesis specific basic helix-loop-helix 1      |
| 1640 | 8169657 SOWAHD    | 2.2082794  | -3.6159 | 0.544286 | 0.039707  | sosondowah ankyrin repeat domain family member D                     |
| 1641 | 7970146 SOX1      | 2.1370485  | -3.7157 | 0.392042 | 0.0458086 | SRY-box 1                                                            |
| 1642 | 8075992 SOX10     | 2.7794909  | -2.7672 | 2.25882  | 0.0119421 | SRY-box 10                                                           |
| 1643 | 8146462 SOX17     | 2.7054846  | -2.881  | 0.541321 | 0.0140191 | SRY-box 17                                                           |
| 1644 | 8048898 SP140     | 2.2290891  | -3.5865 | 1.219554 | 0.0380704 | SP140 nuclear body protein                                           |
| 1645 | 8056798 SP3       | -2.2843807 | -3.5076 | -0.3784  | 0.0340182 | Sp3 transcription factor                                             |
| 1646 | 7944869 SPA17     | -2.6222323 | -3.008  | -0.61675 | 0.0167659 | sperm autoantigenic protein 17                                       |
| 1647 | 7918973 SPAG17    | -3.6239199 | -1.4327 | -4.6838  | 0.0018064 | sperm associated antigen 17                                          |
| 1648 | 8135835 SPAM1     | -3.0221344 | -2.3886 | -1.4654  | 0.0070072 | sperm adhesion molecule 1                                            |
| 1649 | 7909768 SPATA17   | -3.3262182 | -1.9069 | -1.84144 | 0.0035478 | spermatogenesis associated 17                                        |
| 1650 | 8008388 SPATA20   | -2.9739497 | -2.4643 | -0.92871 | 0.0077961 | spermatogenesis associated 20                                        |
| 1651 | 8134785 SPDYE3    | 2.2792481  | -3.515  | 0.406975 | 0.0343769 | speedy/RINGO cell cycle regulator family member E3                   |
| 1652 | 8010061 SPHK1     | 3.8788993  | -1.0281 | 0.864488 | 0.0010097 | sphingosine kinase 1                                                 |
| 1653 | 8030671 SPIB      | 3.8819947  | -1.0232 | 2.095019 | 0.0010026 | Spi-B transcription factor                                           |
| 1654 | 8089627 SPICE1    | -2.7008534 | -2.8881 | -0.699   | 0.0141599 | spindle and centriole associated protein 1                           |
| 1655 | 8156263 SPIN1     | -2.1226135 | -3.7357 | -0.45475 | 0.0471447 | spindlin 1                                                           |
| 1656 | 8173198 SPIN2A    | -2.2068632 | -3.6179 | -0.87674 | 0.0398207 | spindlin family member 2A                                            |
| 1657 | 8173181 SPIN3     | -2.3671768 | -3.3878 | -0.55463 | 0.0286898 | spindlin family member 3                                             |
| 1658 | 8154779 SPINK4    | -2.3557903 | -3.4044 | -0.5521  | 0.0293736 | serine peptidase inhibitor, Kazal type 4                             |
| 1659 | 7982829 SPINT1    | -2.1774219 | -3.6594 | -0.66116 | 0.0422528 | serine peptidase inhibitor, Kunitz type 1                            |
| 1660 | 7994603 SPN       | 2.4664866  | -3.2417 | 0.969022 | 0.0233242 | sialophorin                                                          |
| 1661 | 8045514 SPOPL     | -2.7118933 | -2.8712 | -0.84994 | 0.0138264 | speckle type BTB/POZ protein like                                    |
| 1662 | 7988753 SPPL2A    | -2.5171072 | -3.1663 | -0.44878 | 0.0209656 | signal peptide peptidase like 2A                                     |
| 1663 | 8042696 SPR       | -3.6683477 | -1.362  | -1.09171 | 0.0016326 | sepiapterin reductase (7,8-dihydrobiopterin:NADP+ oxidoreductase)    |
| 1664 | 7920196 SPRR2D    | -2.5757273 | -3.0783 | -4.46464 | 0.018515  | small proline rich protein 2D                                        |
| 1665 | 7963577 SPRYD3    | -2.444587  | -3.2741 | -0.44565 | 0.0244198 | SPRY domain containing 3                                             |
| 1666 | 8083071 SPSB4     | 2.3209451  | -3.4549 | 0.547218 | 0.0315612 | splA/ryanodine receptor domain and SOCS box containing 4             |
| 1667 | 8091799 SPTSSB    | -2.8421514 | -2.6701 | -4.96094 | 0.0104169 | serine palmitoyltransferase small subunit B                          |
| 1668 | 7983512 SQRDL     | -2.8905925 | -2.5947 | -0.66506 | 0.0093677 | sulfide quinone reductase-like (yeast)                               |
| 1669 | 8110569 SQSTM1    | -2.4634634 | -3.2462 | -0.5086  | 0.0234726 | sequestosome 1                                                       |
| 1670 | 8014679 SRCIN1    | -2.2350995 | -3.578  | -1.4695  | 0.0376093 | SRC kinase signaling inhibitor 1                                     |
| 1671 | 8112337 SREK1IP1  | -2.726787  | -2.8483 | -0.61746 | 0.0133884 | SREK1 interacting protein 1                                          |
| 1672 | 7956759 SRGAP1    | -2.3129045 | -3.4665 | -0.8208  | 0.032087  | SLIT-ROBO Rho GTPase activating protein 1                            |
| 1673 | 8107350 SRP19     | -2.2501023 | -3.5566 | -0.99069 | 0.0364808 | signal recognition particle 19                                       |
| 1674 | 8128079 SRSF12    | 3.3143095  | -1.9258 | 0.624327 | 0.0036444 | serine and arginine rich splicing factor 12                          |
| 1675 | 7941843 SSH3      | -2.7805229 | -2.7656 | -0.90773 | 0.0119154 | slingshot protein phosphatase 3                                      |
| 1676 | 8070863 SSR4P1    | 2.4045935  | -3.3331 | 0.386589 | 0.0265457 | signal sequence receptor subunit 4 pseudogene 1                      |
| 1677 | 7985253 ST20-AS1  | 2.2867781  | -3.5042 | 0.519799 | 0.0338519 | ST20 antisense RNA 1                                                 |



|      |         |           |            |         |          |           |                                                                   |
|------|---------|-----------|------------|---------|----------|-----------|-------------------------------------------------------------------|
| 1678 | 7990810 | ST20-MTH  | -2.5687548 | -3.0888 | -0.41982 | 0.0187916 | ST20-MTHFS readthrough///5,10-methenyltetrahydrofolate synthetas  |
| 1679 | 8002370 | ST3GAL2   | 3.7493778  | -1.2332 | 0.699166 | 0.0013571 | ST3 beta-galactoside alpha-2,3-sialyltransferase 2                |
| 1680 | 7961757 | ST8SIA1   | 3.4760882  | -1.6681 | 1.653232 | 0.0025277 | ST8 alpha-N-acetyl-neuraminide alpha-2,8-sialyltransferase 1      |
| 1681 | 7932407 | ST8SIA6   | -2.4240379 | -3.3045 | -2.11961 | 0.0254914 | ST8 alpha-N-acetyl-neuraminide alpha-2,8-sialyltransferase 6      |
| 1682 | 8055890 | STAM2     | -2.1335209 | -3.7206 | -0.4721  | 0.0461319 | signal transducing adaptor molecule 2                             |
| 1683 | 8095343 | STAP1     | 4.0425452  | -0.7704 | 2.284793 | 0.0006948 | signal transducing adaptor family member 1                        |
| 1684 | 7950235 | STARD10   | -2.6266474 | -3.0013 | -1.92295 | 0.0166082 | StAR related lipid transfer domain containing 10                  |
| 1685 | 8132376 | STARD3NL  | -2.2175471 | -3.6028 | -0.55355 | 0.0389703 | STARD3 N-terminal like                                            |
| 1686 | 8023394 | STARD6    | 2.2464532  | -3.5618 | 0.758214 | 0.0367524 | StAR related lipid transfer domain containing 6                   |
| 1687 | 8007212 | STAT5A    | 2.1273498  | -3.7292 | 0.687542 | 0.0467024 | signal transducer and activator of transcription 5A               |
| 1688 | 8115851 | STC2      | -3.4239547 | -1.7512 | -2.96024 | 0.0028447 | stanniocalcin 2                                                   |
| 1689 | 8138527 | STEAP1B   | 2.194211   | -3.6358 | 0.830422 | 0.0408498 | STEAP family member 1B                                            |
| 1690 | 8134036 | STEAP2    | -2.2113519 | -3.6116 | -0.84742 | 0.0394614 | STEAP2 metalloredutase                                            |
| 1691 | 8024204 | STK11     | -2.2773577 | -3.5177 | -0.46737 | 0.0345099 | serine/threonine kinase 11                                        |
| 1692 | 8048505 | STK16     | -2.2107032 | -3.6125 | -0.68127 | 0.0395132 | serine/threonine kinase 16                                        |
| 1693 | 8093858 | STK32B    | -2.3740752 | -3.3777 | -1.57489 | 0.0282828 | serine/threonine kinase 32B                                       |
| 1694 | 8048381 | STK36     | -2.2959436 | -3.491  | -0.64952 | 0.0332228 | serine/threonine kinase 36                                        |
| 1695 | 8149898 | STMN4     | 2.5167777  | -3.1668 | 0.649606 | 0.0209802 | stathmin 4                                                        |
| 1696 | 8098549 | STOX2     | 2.9439574  | -2.5113 | 1.643196 | 0.0083297 | storkhead box 2                                                   |
| 1697 | 7978428 | STRN3     | -2.0978846 | -3.7698 | -0.37906 | 0.0495159 | striatin 3                                                        |
| 1698 | 8000590 | SULT1A1   | -2.5017259 | -3.1893 | -0.96524 | 0.0216574 | sulfotransferase family 1A member 1                               |
| 1699 | 8000582 | SULT1A2   | -2.2875452 | -3.5031 | -0.89583 | 0.0337988 | sulfotransferase family 1A member 2                               |
| 1700 | 8174636 | SUMO4///: | -2.5479149 | -3.1201 | -0.53517 | 0.0196419 | small ubiquitin-like modifier 4///small ubiquitin-like modifier 2 |
| 1701 | 8018315 | SUMO4///: | -2.4124337 | -3.3215 | -0.50974 | 0.0261158 | small ubiquitin-like modifier 4///small ubiquitin-like modifier 2 |
| 1702 | 8178322 | SUMO4///: | -2.3994292 | -3.3406 | -0.50676 | 0.0268325 | small ubiquitin-like modifier 4///small ubiquitin-like modifier 2 |
| 1703 | 8159008 | SURF2     | -2.1541838 | -3.6919 | -0.78224 | 0.0442674 | surfeit 2                                                         |
| 1704 | 7932796 | SVIL      | 2.6976505  | -2.893  | 0.984304 | 0.0142581 | supervillin                                                       |
| 1705 | 8077879 | SYN2      | 2.1125157  | -3.7497 | 1.079086 | 0.0481002 | synapsin II                                                       |
| 1706 | 8075616 | SYN3      | 3.8261159  | -1.1116 | 1.073096 | 0.0011391 | synapsin III                                                      |
| 1707 | 7914557 | SYNC      | -2.9872328 | -2.4435 | -1.01586 | 0.0075704 | syncoilin, intermediate filament protein                          |
| 1708 | 7947590 | SYT13     | -2.9632044 | -2.4812 | -4.32666 | 0.0079833 | synaptotagmin 13                                                  |
| 1709 | 7993624 | SYT17     | -2.3891494 | -3.3557 | -1.70406 | 0.027412  | synaptotagmin 17                                                  |
| 1710 | 7950810 | SYTL2     | -2.4449128 | -3.2737 | -1.86048 | 0.0244031 | synaptotagmin like 2                                              |
| 1711 | 8173955 | SYTL4     | -2.3795372 | -3.3698 | -1.41782 | 0.0279643 | synaptotagmin like 4                                              |
| 1712 | 7898328 | SZRD1     | -2.0962338 | -3.7721 | -0.4308  | 0.049678  | SUZ RNA binding domain containing 1                               |
| 1713 | 8122131 | TAAR6     | 2.2232478  | -3.5948 | 0.485229 | 0.0385234 | trace amine associated receptor 6                                 |
| 1714 | 7916584 | TACSTD2   | -2.3205088 | -3.4556 | -1.0453  | 0.0315895 | tumor-associated calcium signal transducer 2                      |
| 1715 | 8020702 | TAF4B     | 3.1908479  | -2.122  | 1.168431 | 0.0048101 | TATA-box binding protein associated factor 4b                     |
| 1716 | 8173732 | TAF9B     | -2.6825464 | -2.9161 | -0.72621 | 0.0147299 | TATA-box binding protein associated factor 9b                     |
| 1717 | 8176263 | TAF9B     | -2.6825464 | -2.9161 | -0.72621 | 0.0147299 | TATA-box binding protein associated factor 9b                     |
| 1718 | 8130539 | TAGAP     | 2.1425686  | -3.708  | 1.048434 | 0.0453069 | T-cell activation RhoGTPase activating protein                    |
| 1719 | 8081620 | TAGLN3    | 2.2140039  | -3.6079 | 0.679006 | 0.0392505 | transgelin 3                                                      |
| 1720 | 7994692 | TAOK2     | -2.6396202 | -2.9816 | -0.59052 | 0.0161531 | TAO kinase 2                                                      |
| 1721 | 8099506 | TAPT1     | -3.0184523 | -2.3944 | -0.88065 | 0.0070646 | transmembrane anterior posterior transformation 1                 |
| 1722 | 7897663 | TARDBP    | -2.4962909 | -3.1974 | -0.37649 | 0.021907  | TAR DNA binding protein                                           |
| 1723 | 8136645 | TAS2R4    | -2.1818953 | -3.6531 | -1.03054 | 0.0418747 | taste 2 receptor member 4                                         |
| 1724 | 8136846 | TAS2R40   | -2.1661544 | -3.6751 | -0.64661 | 0.043219  | taste 2 receptor member 40                                        |
| 1725 | 8077804 | TATDN2    | 2.1545012  | -3.6914 | 0.563495 | 0.0442393 | TatD DNase domain containing 2                                    |
| 1726 | 8000856 | TBC1D10B  | -2.3796987 | -3.3695 | -0.65638 | 0.0279549 | TBC1 domain family member 10B                                     |
| 1727 | 7941879 | TBC1D10C  | 3.4430553  | -1.7208 | 0.918115 | 0.0027242 | TBC1 domain family member 10C                                     |
| 1728 | 8030539 | TBC1D17   | -2.2427232 | -3.5671 | -0.44281 | 0.0370319 | TBC1 domain family member 17                                      |
| 1729 | 7984759 | TBC1D21   | 3.0099181  | -2.4078 | 0.611181 | 0.0071995 | TBC1 domain family member 21                                      |
| 1730 | 7956826 | TBC1D30   | -2.5213654 | -3.1599 | -1.22949 | 0.0207778 | TBC1 domain family member 30                                      |
| 1731 | 7972021 | TBC1D4    | 2.1207308  | -3.7383 | 0.68018  | 0.0473215 | TBC1 domain family member 4                                       |
| 1732 | 8054308 | TBC1D8    | -3.7025726 | -1.3076 | -0.98952 | 0.00151   | TBC1 domain family member 8                                       |
| 1733 | 8102912 | TBC1D9    | -2.3452591 | -3.4197 | -1.46047 | 0.0300194 | TBC1 domain family member 9                                       |
| 1734 | 7966690 | TBX3      | -2.8869992 | -2.6003 | -1.50356 | 0.0094419 | T-box 3                                                           |
| 1735 | 8143597 | TCAF1     | -2.587616  | -3.0604 | -0.60301 | 0.0180521 | TRPM8 channel associated factor 1                                 |
| 1736 | 8136940 | TCAF2P1// | 2.1622469  | -3.6806 | 0.837433 | 0.0435587 | TRPM8 channel associated factor 2 pseudogene 1///TRPM8 channel    |
| 1737 | 8136954 | TCAF2P1// | 2.1539229  | -3.6922 | 0.767991 | 0.0442905 | TRPM8 channel associated factor 2 pseudogene 1///TRPM8 channel    |
| 1738 | 7913593 | TCEA3     | -3.2504003 | -2.0275 | -0.99732 | 0.0042083 | transcription elongation factor A3                                |
| 1739 | 8168892 | TCEAL2    | 2.1656863  | -3.6758 | 0.543841 | 0.0432595 | transcription elongation factor A like 2                          |
| 1740 | 8040827 | TCF23     | 2.1980747  | -3.6303 | 0.356964 | 0.040533  | transcription factor 23                                           |
| 1741 | 8108050 | TCF7      | 3.1220379  | -2.231  | 1.083427 | 0.0056104 | transcription factor 7 (T-cell specific, HMG-box)                 |
| 1742 | 7948444 | TCN1      | 2.3353508  | -3.4341 | 1.773821 | 0.0306391 | transcobalamin 1                                                  |
| 1743 | 8072360 | TCN2      | 2.3698816  | -3.3839 | 0.750662 | 0.0285296 | transcobalamin 2                                                  |
| 1744 | 7958692 | TCTN1     | -2.6130445 | -3.0219 | -0.70617 | 0.0170986 | tectonic family member 1                                          |
| 1745 | 7959638 | TCTN2     | -2.8873342 | -2.5998 | -0.84826 | 0.009435  | tectonic family member 2                                          |
| 1746 | 8156688 | TDRD7     | -2.6697314 | -2.9357 | -0.72044 | 0.0151418 | tudor domain containing 7                                         |
| 1747 | 7983828 | TEX9      | -2.4852879 | -3.2138 | -1.35189 | 0.0224205 | testis expressed 9                                                |
| 1748 | 7925611 | TFB2M     | -2.8521445 | -2.6546 | -0.59507 | 0.0101916 | transcription factor B2, mitochondrial                            |
| 1749 | 7963244 | TFCP2     | -2.738191  | -2.8308 | -0.61349 | 0.0130619 | transcription factor CP2                                          |
| 1750 | 8126312 | TFEB      | 2.3394927  | -3.4281 | 0.481932 | 0.0303786 | transcription factor EB                                           |

|      |         |            |            |         |          |           |                                                                 |
|------|---------|------------|------------|---------|----------|-----------|-----------------------------------------------------------------|
| 1751 | 8070579 | TFF1       | -2.1497383 | -3.6981 | -2.85083 | 0.0446627 | trefoil factor 1                                                |
| 1752 | 8070567 | TFF3       | -2.613275  | -3.0215 | -2.44223 | 0.0170901 | trefoil factor 3                                                |
| 1753 | 8019939 | TGIF1      | -2.1501772 | -3.6974 | -0.42809 | 0.0446235 | TGFB induced factor homeobox 1                                  |
| 1754 | 7990086 | THAP10     | -2.7703383 | -2.7813 | -0.71622 | 0.0121821 | THAP domain containing 10                                       |
| 1755 | 7957161 | THAP2      | -2.5801966 | -3.0716 | -1.10207 | 0.0183397 | THAP domain containing 2                                        |
| 1756 | 8144151 | THAP5P1    | -2.2349983 | -3.5781 | -0.6868  | 0.0376171 | THAP domain containing 5 pseudogene 1                           |
| 1757 | 8043393 | THNSL2     | -2.3496054 | -3.4134 | -1.59201 | 0.0297513 | threonine synthase like 2                                       |
| 1758 | 8088526 | THOC7      | -3.0996698 | -2.2663 | -0.62939 | 0.0058975 | THO complex 7                                                   |
| 1759 | 7984588 | THSD4      | -3.1201701 | -2.2339 | -2.20188 | 0.0056339 | thrombospondin type 1 domain containing 4                       |
| 1760 | 8114239 | TIFAB///DC | 2.4263988  | -3.301  | 0.841778 | 0.0253661 | TIFA inhibitor///dendritic cell associated nuclear protein      |
| 1761 | 8083569 | TIPARP     | -3.3182222 | -1.9196 | -1.01296 | 0.0036124 | TCDD inducible poly(ADP-ribose) polymerase                      |
| 1762 | 7989915 | TIPIN      | -2.5432445 | -3.1272 | -0.43657 | 0.0198374 | TIMELESS interacting protein                                    |
| 1763 | 7986977 | TJP1       | -2.5635905 | -3.0966 | -0.61929 | 0.0189999 | tight junction protein 1                                        |
| 1764 | 8024687 | TJP3       | -2.702556  | -2.8855 | -1.01422 | 0.014108  | tight junction protein 3                                        |
| 1765 | 7940451 | TKFC       | -3.2043709 | -2.1005 | -1.00763 | 0.0046665 | triokinase and FMN cyclase                                      |
| 1766 | 8099826 | TLR10      | 2.5518407  | -3.1143 | 1.360352 | 0.019479  | toll like receptor 10                                           |
| 1767 | 8109969 | TLX3       | -2.7172486 | -2.863  | -0.52081 | 0.0136674 | T-cell leukemia homeobox 3                                      |
| 1768 | 7916643 | TM2D1      | -2.180187  | -3.6555 | -0.62434 | 0.0420187 | TM2 domain containing 1                                         |
| 1769 | 7961983 | TM7SF3     | 2.3918368  | -3.3518 | 0.622747 | 0.0272594 | transmembrane 7 superfamily member 3                            |
| 1770 | 8039144 | TMC4       | -3.1801966 | -2.1389 | -1.32972 | 0.0049263 | transmembrane channel like 4                                    |
| 1771 | 8010212 | TMC8       | 2.4366512  | -3.2859 | 1.124626 | 0.0248285 | transmembrane channel like 8                                    |
| 1772 | 7970301 | TMCO3      | -3.2552393 | -2.0198 | -0.79303 | 0.0041628 | transmembrane and coiled-coil domains 3                         |
| 1773 | 8004404 | TMEM102    | 2.1766934  | -3.6604 | 0.300055 | 0.0423147 | transmembrane protein 102                                       |
| 1774 | 8131539 | TMEM106E   | -2.1392375 | -3.7127 | -0.58186 | 0.0456091 | transmembrane protein 106B                                      |
| 1775 | 8088047 | TMEM110-   | 2.3650959  | -3.3908 | 0.378846 | 0.0288137 | TMEM110-MUSTN1 readthrough///musculoskeletal, embryonic nucle   |
| 1776 | 7900654 | TMEM125    | -2.1407183 | -3.7106 | -0.80745 | 0.0454745 | transmembrane protein 125                                       |
| 1777 | 8099099 | TMEM128    | -2.1672215 | -3.6736 | -0.46746 | 0.0431266 | transmembrane protein 128                                       |
| 1778 | 8159379 | TMEM141    | -2.8545021 | -2.6509 | -0.94265 | 0.0101391 | transmembrane protein 141                                       |
| 1779 | 8098041 | TMEM144    | -2.4518515 | -3.2634 | -0.76877 | 0.0240511 | transmembrane protein 144                                       |
| 1780 | 8120239 | TMEM14A    | -3.2673107 | -2.0006 | -0.87241 | 0.0040513 | transmembrane protein 14A                                       |
| 1781 | 8116867 | TMEM14B    | -2.3860981 | -3.3602 | -0.53985 | 0.0275862 | transmembrane protein 14B                                       |
| 1782 | 8116859 | TMEM14C    | -2.8011417 | -2.7337 | -0.6221  | 0.0113924 | transmembrane protein 14C                                       |
| 1783 | 8099850 | TMEM156    | 3.1926759  | -2.1191 | 1.75757  | 0.0047905 | transmembrane protein 156                                       |
| 1784 | 8113023 | TMEM161E   | -2.3416517 | -3.4249 | -0.47664 | 0.0302437 | transmembrane protein 161B                                      |
| 1785 | 8093413 | TMEM175    | -2.3620048 | -3.3953 | -0.55163 | 0.0289985 | transmembrane protein 175                                       |
| 1786 | 8041570 | TMEM178A   | -2.7413804 | -2.8259 | -0.45863 | 0.012972  | transmembrane protein 178A                                      |
| 1787 | 8137783 | TMEM184A   | -2.9354993 | -2.5246 | -1.60019 | 0.0084865 | transmembrane protein 184A                                      |
| 1788 | 8097704 | TMEM184C   | -2.6075462 | -3.0302 | -0.62463 | 0.0173006 | transmembrane protein 184C                                      |
| 1789 | 8048628 | TMEM198    | 2.6245309  | -3.0045 | 0.449216 | 0.0166837 | transmembrane protein 198                                       |
| 1790 | 8113483 | TMEM232    | -2.1149506 | -3.7463 | -1.18667 | 0.0478682 | transmembrane protein 232                                       |
| 1791 | 7914500 | TMEM234    | -2.4390042 | -3.2824 | -0.62073 | 0.0247067 | transmembrane protein 234                                       |
| 1792 | 7944275 | TMEM25     | -3.3463361 | -1.8749 | -0.96342 | 0.0033904 | transmembrane protein 25                                        |
| 1793 | 8026579 | TMEM38A    | 2.2413005  | -3.5692 | 0.793003 | 0.037139  | transmembrane protein 38A                                       |
| 1794 | 7946504 | TMEM41B    | -2.4360902 | -3.2867 | -0.56895 | 0.0248577 | transmembrane protein 41B                                       |
| 1795 | 8077993 | TMEM43     | 2.4153005  | -3.3173 | 0.678626 | 0.0259602 | transmembrane protein 43                                        |
| 1796 | 7945169 | TMEM45B    | -2.6072485 | -3.0307 | -1.86743 | 0.0173116 | transmembrane protein 45B                                       |
| 1797 | 7956749 | TMEM5///   | -2.4368069 | -3.2856 | -0.58429 | 0.0248205 | transmembrane protein 5///transmembrane protein 5               |
| 1798 | 7899005 | TMEM50A    | -2.6135945 | -3.0211 | -0.44257 | 0.0170785 | transmembrane protein 50A                                       |
| 1799 | 7916372 | TMEM59     | -2.2780609 | -3.5167 | -0.48803 | 0.0344604 | transmembrane protein 59                                        |
| 1800 | 8147313 | TMEM67     | -3.3904462 | -1.8046 | -0.90293 | 0.0030688 | transmembrane protein 67                                        |
| 1801 | 8152976 | TMEM71     | 2.4655309  | -3.2431 | 1.378508 | 0.023371  | transmembrane protein 71                                        |
| 1802 | 7987869 | TMEM87A    | -2.9103102 | -2.564  | -0.49026 | 0.0089705 | transmembrane protein 87A                                       |
| 1803 | 8155148 | TMEM8B     | -2.4366488 | -3.2859 | -0.68661 | 0.0248287 | transmembrane protein 8B                                        |
| 1804 | 7957478 | TMTC3      | -2.2213564 | -3.5975 | -0.48678 | 0.0386712 | transmembrane and tetratricopeptide repeat containing 3         |
| 1805 | 8122265 | TNFAIP3    | 3.8671976  | -1.0466 | 1.151069 | 0.0010371 | TNF alpha induced protein 3                                     |
| 1806 | 8021528 | TNFRSF11A  | 2.4833806  | -3.2166 | 1.009117 | 0.0225107 | TNF receptor superfamily member 11a                             |
| 1807 | 7993267 | TNFRSF17   | 2.6416552  | -2.9785 | 1.607141 | 0.0160828 | TNF receptor superfamily member 17                              |
| 1808 | 7897877 | TNFRSF1B   | 2.0989188  | -3.7684 | 0.77643  | 0.0494146 | TNF receptor superfamily member 1B                              |
| 1809 | 7911413 | TNFRSF4    | 2.3151073  | -3.4634 | 0.470931 | 0.0319422 | TNF receptor superfamily member 4                               |
| 1810 | 8004372 | TNK1///TN  | -3.1186874 | -2.2363 | -0.80695 | 0.0056525 | tyrosine kinase non receptor 1///tyrosine kinase non receptor 1 |
| 1811 | 7907549 | TNN        | 2.14268    | -3.7079 | 1.379924 | 0.0452968 | tenascin N                                                      |
| 1812 | 8087925 | TNNC1      | -2.284565  | -3.5073 | -0.7362  | 0.0340054 | troponin C1, slow skeletal and cardiac type                     |
| 1813 | 7923360 | TNNI1      | 2.3235291  | -3.4512 | 0.557909 | 0.0313939 | troponin I1, slow skeletal type                                 |
| 1814 | 8016739 | TOB1       | -2.714711  | -2.8669 | -0.71233 | 0.0137425 | transducer of ERBB2, 1                                          |
| 1815 | 8008547 | TOM1L1     | -2.8907258 | -2.5945 | -0.99137 | 0.009365  | target of myb1 like 1 membrane trafficking protein              |
| 1816 | 8150962 | TOX        | 2.2153581  | -3.6059 | 1.06552  | 0.0391432 | thymocyte selection associated high mobility group box          |
| 1817 | 8001394 | TOX3       | -3.4425741 | -1.7216 | -2.20413 | 0.0027272 | TOX high mobility group box family member 3                     |
| 1818 | 8140739 | TP53TG1    | -2.3172279 | -3.4603 | -0.70398 | 0.0318033 | TP53 target 1 (non-protein coding)                              |
| 1819 | 7911854 | TP73-AS1   | -2.2138149 | -3.6081 | -0.48278 | 0.0392655 | TP73 antisense RNA 1                                            |
| 1820 | 8120880 | TPBG       | -3.9554725 | -0.9073 | -1.49366 | 0.0008477 | trophoblast glycoprotein                                        |
| 1821 | 8053379 | TRABD2A    | 2.2297825  | -3.5855 | 0.621215 | 0.0380169 | TraB domain containing 2A                                       |
| 1822 | 8163825 | TRAF1      | 2.1921357  | -3.6387 | 0.685982 | 0.0410209 | TNF receptor associated factor 1                                |
| 1823 | 8049635 | TRAF3IP1   | -2.5751512 | -3.0792 | -0.53124 | 0.0185377 | TRAF3 interacting protein 1                                     |

|      |         |            |            |         |          |           |                                                                        |
|------|---------|------------|------------|---------|----------|-----------|------------------------------------------------------------------------|
| 1824 | 7909455 | TRAF3IP3   | 2.3823369  | -3.3657 | 1.116619 | 0.0278024 | TRAF3 interacting protein 3                                            |
| 1825 | 7973221 | TRAJ17///T | 2.2456085  | -3.563  | 1.370494 | 0.0368155 | T cell receptor alpha joining 17///T cell receptor alpha variable 12-2 |
| 1826 | 8105661 | TRAPPC13   | -2.8614597 | -2.6401 | -3.57966 | 0.0099858 | trafficking protein particle complex 13                                |
| 1827 | 8060344 | TRIB3      | -2.1426963 | -3.7079 | -0.95831 | 0.0452954 | tribbles pseudokinase 3                                                |
| 1828 | 7946180 | TRIM3      | -2.1084009 | -3.7553 | -0.82107 | 0.0484946 | tripartite motif containing 3                                          |
| 1829 | 7913907 | TRIM63     | 2.7313935  | -2.8413 | 0.865786 | 0.0132556 | tripartite motif containing 63                                         |
| 1830 | 7938012 | TRIM6-TRI  | -2.2026804 | -3.6238 | -0.8212  | 0.0401583 | TRIM6-TRIM34 readthrough///tripartite motif containing 6///tripartite  |
| 1831 | 8098697 | TRIML1     | 2.7175328  | -2.8625 | 1.01446  | 0.013659  | tripartite motif family like 1                                         |
| 1832 | 7984190 | TRIP4      | -2.7699568 | -2.7819 | -0.48909 | 0.0121922 | thyroid hormone receptor interactor 4                                  |
| 1833 | 7949075 | TRMT112    | -2.3220132 | -3.4534 | -0.45114 | 0.031492  | tRNA methyltransferase 11-2 homolog (S. cerevisiae)                    |
| 1834 | 7908421 | TROVE2     | -2.7072565 | -2.8783 | -0.66053 | 0.0139656 | TROVE domain family member 2                                           |
| 1835 | 8102678 | TRPC3      | 2.5118213  | -3.1742 | 0.653734 | 0.021201  | transient receptor potential cation channel subfamily C member 3       |
| 1836 | 7949046 | TRPT1      | -2.3553496 | -3.405  | -0.53908 | 0.0294004 | tRNA phosphotransferase 1                                              |
| 1837 | 8011354 | TRPV3      | 2.6208374  | -3.0101 | 1.17313  | 0.016816  | transient receptor potential cation channel subfamily V member 3       |
| 1838 | 8134470 | TRRAP      | 2.1283439  | -3.7278 | 0.397237 | 0.0466101 | transformation/transcription domain associated protein                 |
| 1839 | 8174361 | TSC22D3    | -2.2035608 | -3.6226 | -0.56925 | 0.040087  | TSC22 domain family member 3                                           |
| 1840 | 8141526 | TSC22D4    | 2.7819888  | -2.7633 | 0.782257 | 0.0118774 | TSC22 domain family member 4                                           |
| 1841 | 7910550 | TSNAX-DIS  | -3.4224345 | -1.7536 | -0.81321 | 0.0028545 | TSNAX-DISC1 readthrough (NMD candidate)///translin associated fa       |
| 1842 | 7901175 | TSPAN1     | -4.7667366 | 0.3369  | -4.72819 | 0.000134  | tetraspanin 1                                                          |
| 1843 | 8131600 | TSPAN13    | -2.3728517 | -3.3795 | -1.15204 | 0.0283546 | tetraspanin 13                                                         |
| 1844 | 7928046 | TSPAN15    | -2.4732434 | -3.2317 | -1.10391 | 0.0229956 | tetraspanin 15                                                         |
| 1845 | 7956613 | TSPAN31//  | -2.3502044 | -3.4125 | -0.77682 | 0.0297145 | tetraspanin 31///tetraspanin 31                                        |
| 1846 | 8136067 | TSPAN33    | 2.4528929  | -3.2618 | 0.956389 | 0.0239987 | tetraspanin 33                                                         |
| 1847 | 8035684 | TSSK6      | -2.222052  | -3.5965 | -0.97155 | 0.0386168 | testis specific serine kinase 6                                        |
| 1848 | 8162676 | TSTD2      | -2.2113988 | -3.6115 | -0.46498 | 0.0394577 | thiosulfate sulfurtransferase like domain containing 2                 |
| 1849 | 8136495 | TTC26      | -2.1114261 | -3.7512 | -0.70017 | 0.0482044 | tetratricopeptide repeat domain 26                                     |
| 1850 | 8056999 | TTC30A     | -3.5389704 | -1.5679 | -1.15363 | 0.0021914 | tetratricopeptide repeat domain 30A                                    |
| 1851 | 7916024 | TTC39A     | -2.4648347 | -3.2442 | -1.75028 | 0.0234052 | tetratricopeptide repeat domain 39A                                    |
| 1852 | 7965935 | TTC41P     | -2.5342534 | -3.1406 | -1.58102 | 0.0202189 | tetratricopeptide repeat domain 41, pseudogene                         |
| 1853 | 7974008 | TTC6       | -3.6136402 | -1.449  | -2.6865  | 0.0018492 | tetratricopeptide repeat domain 6                                      |
| 1854 | 7974029 | TTC6       | -2.6941665 | -2.8983 | -2.69018 | 0.0143656 | tetratricopeptide repeat domain 6                                      |
| 1855 | 7980720 | TTC7B      | 3.2766419  | -1.9857 | 0.694659 | 0.0039671 | tetratricopeptide repeat domain 7B                                     |
| 1856 | 7976128 | TTC8       | -3.1558049 | -2.1775 | -0.98892 | 0.0052027 | tetratricopeptide repeat domain 8                                      |
| 1857 | 8057056 | TTN        | 2.4768494  | -3.2263 | 1.851341 | 0.022822  | titin                                                                  |
| 1858 | 8151042 | TPPA       | -3.44064   | -1.7246 | -1.52224 | 0.0027392 | alpha tocopherol transfer protein                                      |
| 1859 | 8031157 | TTYH1      | 2.6901609  | -2.9045 | 1.681877 | 0.0144902 | tweety family member 1                                                 |
| 1860 | 8116649 | TUBB2A     | 2.3113814  | -3.4687 | 0.481318 | 0.0321875 | tubulin beta 2A class IIa                                              |
| 1861 | 8116653 | TUBB2A     | 2.3113814  | -3.4687 | 0.481318 | 0.0321875 | tubulin beta 2A class IIa                                              |
| 1862 | 7998063 | TUBB3///M  | 2.2333736  | -3.5804 | 0.610653 | 0.0377412 | tubulin beta 3 class III///melanocortin 1 receptor                     |
| 1863 | 8159642 | TUBB4B     | -2.4349614 | -3.2884 | -0.54686 | 0.0249164 | tubulin beta 4B class IVb                                              |
| 1864 | 7931674 | TUBB8      | 2.2923001  | -3.4962 | 0.379059 | 0.0334715 | tubulin beta 8 class VIII                                              |
| 1865 | 7981798 | TUBGCP5    | -2.3433758 | -3.4224 | -0.54627 | 0.0301363 | tubulin gamma complex associated protein 5                             |
| 1866 | 8013906 | TWF1       | -3.422557  | -1.7535 | -0.74664 | 0.0028537 | twinfilin actin binding protein 1                                      |
| 1867 | 7962441 | TWF1       | -3.2918125 | -1.9616 | -0.71179 | 0.0038339 | twinfilin actin binding protein 1                                      |
| 1868 | 8100210 | TXK        | 2.2104395  | -3.6129 | 1.029788 | 0.0395342 | TXK tyrosine kinase                                                    |
| 1869 | 8058108 | TYW5       | -2.9249292 | -2.5411 | -0.45079 | 0.0086864 | tRNA-yW synthesizing protein 5                                         |
| 1870 | 8068788 | UBASH3A    | 2.2096403  | -3.614  | 1.63635  | 0.0395981 | ubiquitin associated and SH3 domain containing A                       |
| 1871 | 8049582 | UBE2F-SCL  | -2.5768639 | -3.0766 | -0.89621 | 0.0184702 | UBE2F-SCLY readthrough (NMD candidate)///selenocysteine lyase          |
| 1872 | 7986769 | UBE3A      | -2.6420622 | -2.9778 | -0.51833 | 0.0160687 | ubiquitin protein ligase E3A                                           |
| 1873 | 7958532 | UBE3B      | -2.520805  | -3.1608 | -0.54186 | 0.0208024 | ubiquitin protein ligase E3B                                           |
| 1874 | 7913918 | UBXN11     | -2.4861444 | -3.2125 | -0.58344 | 0.0223801 | UBX domain protein 11                                                  |
| 1875 | 8145691 | UBXN8      | -2.8616181 | -2.6399 | -0.89507 | 0.0099823 | UBX domain protein 8                                                   |
| 1876 | 7947027 | UEVLD      | -2.6505539 | -2.9649 | -0.69418 | 0.0157787 | UEV and lactate/malate dehydrogenase domains                           |
| 1877 | 7968670 | UFM1       | -2.4098505 | -3.3253 | -0.35133 | 0.0262567 | ubiquitin fold modifier 1                                              |
| 1878 | 8141643 | UFSP1      | 2.1032871  | -3.7624 | 0.591884 | 0.0489888 | UFM1 specific peptidase 1 (inactive)                                   |
| 1879 | 8099897 | UGDH       | -3.3537147 | -1.8631 | -1.41775 | 0.0033344 | UDP-glucose 6-dehydrogenase                                            |
| 1880 | 8097017 | UGT8       | 2.2615204  | -3.5403 | 1.723639 | 0.0356428 | UDP glycosyltransferase 8                                              |
| 1881 | 7965723 | UHRF1BP1   | -3.6116933 | -1.4521 | -0.77092 | 0.0018574 | UHRF1 binding protein 1 like                                           |
| 1882 | 8035880 | UQCRF51    | 2.2464515  | -3.5618 | 0.526614 | 0.0367525 | ubiquinol-cytochrome c reductase, Rieske iron-sulfur polypeptide 1     |
| 1883 | 8069943 | URB1       | 2.3358959  | -3.4333 | 0.60941  | 0.0306047 | URB1 ribosome biogenesis 1 homolog (S. cerevisiae)                     |
| 1884 | 8018258 | USH1G      | 2.5917866  | -3.0541 | 0.607704 | 0.0178923 | USH1 protein network component sans                                    |
| 1885 | 7958439 | USP30      | -2.5071338 | -3.1812 | -0.5729  | 0.0214118 | ubiquitin specific peptidase 30                                        |
| 1886 | 8059801 | USP40      | -3.6634772 | -1.3697 | -0.82774 | 0.0016508 | ubiquitin specific peptidase 40                                        |
| 1887 | 8106193 | UTP15      | -2.2145044 | -3.6072 | -0.40368 | 0.0392108 | UTP15, small subunit processome component                              |
| 1888 | 7897370 | VAMP3      | -2.9197443 | -2.5492 | -0.52393 | 0.0087862 | vesicle associated membrane protein 3                                  |
| 1889 | 8020129 | VAPA       | -2.1116217 | -3.7509 | -0.32819 | 0.0481856 | VAMP associated protein A                                              |
| 1890 | 7918157 | VAV3       | -2.172881  | -3.6657 | -1.30257 | 0.0426398 | vav guanine nucleotide exchange factor 3                               |
| 1891 | 8042532 | VAX2       | 2.6828433  | -2.9157 | 0.482966 | 0.0147205 | ventral anterior homeobox 2                                            |
| 1892 | 7978923 | VCPKMT     | -2.740434  | -2.8274 | -0.59908 | 0.0129986 | valosin containing protein lysine methyltransferase                    |
| 1893 | 8016891 | VEZF1      | -2.8486099 | -2.6601 | -0.59878 | 0.0102707 | vascular endothelial zinc finger 1                                     |
| 1894 | 7957613 | VEZT       | -2.1581389 | -3.6863 | -0.496   | 0.0439185 | vezatin, adherens junctions transmembrane protein                      |
| 1895 | 8170179 | VGLL1      | 2.7401232  | -2.8278 | 1.881651 | 0.0130074 | vestigial like family member 1                                         |
| 1896 | 7948504 | VPS37C     | -2.2112578 | -3.6117 | -0.71056 | 0.0394689 | VPS37C, ESCRT-I subunit                                                |

|      |         |           |            |         |          |           |                                                                  |
|------|---------|-----------|------------|---------|----------|-----------|------------------------------------------------------------------|
| 1897 | 7987840 | VPS39     | -2.2359018 | -3.5768 | -0.35805 | 0.0375482 | VPS39, HOPS complex subunit                                      |
| 1898 | 7966839 | VSIG10    | -2.1804956 | -3.6551 | -0.62824 | 0.0419927 | V-set and immunoglobulin domain containing 10                    |
| 1899 | 8142671 | WASL      | -2.2652623 | -3.535  | -0.53525 | 0.0353721 | Wiskott-Aldrich syndrome like                                    |
| 1900 | 7927405 | WDFY4     | 2.9983572  | -2.426  | 1.416156 | 0.0073863 | WDFY family member 4                                             |
| 1901 | 7927425 | WDFY4     | 2.8581508  | -2.6453 | 1.336647 | 0.0100584 | WDFY family member 4                                             |
| 1902 | 7976766 | WDR25     | -2.0992752 | -3.7679 | -0.53434 | 0.0493797 | WD repeat domain 25                                              |
| 1903 | 8163491 | WDR31     | -2.7861191 | -2.7569 | -0.57927 | 0.0117712 | WD repeat domain 31                                              |
| 1904 | 8157818 | WDR38     | 2.2037159  | -3.6224 | 0.373887 | 0.0400745 | WD repeat domain 38                                              |
| 1905 | 8091922 | WDR49     | -2.1078077 | -3.7562 | -0.67427 | 0.0485517 | WD repeat domain 49                                              |
| 1906 | 7959330 | WDR66     | -3.3349817 | -1.8929 | -1.0831  | 0.0034784 | WD repeat domain 66                                              |
| 1907 | 7991126 | WDR73     | -2.8006318 | -2.7345 | -0.53137 | 0.0114051 | WD repeat domain 73                                              |
| 1908 | 8066574 | WFDC10B   | 2.4088592  | -3.3268 | 0.729482 | 0.026311  | WAP four-disulfide core domain 10B                               |
| 1909 | 8093906 | WFS1      | -2.4259377 | -3.3017 | -1.04302 | 0.0253905 | wolframin ER transmembrane glycoprotein                          |
| 1910 | 7964722 | WIF1      | 2.4472554  | -3.2702 | 3.384427 | 0.0242837 | WNT inhibitory factor 1                                          |
| 1911 | 7924832 | WNT9A     | -2.9236218 | -2.5432 | -0.85532 | 0.0087115 | Wnt family member 9A                                             |
| 1912 | 8147156 | WWP1      | -2.7127081 | -2.8699 | -1.05785 | 0.0138021 | WW domain containing E3 ubiquitin protein ligase 1               |
| 1913 | 7936284 | XPNPEP1   | 2.0974211  | -3.7705 | 0.45391  | 0.0495614 | X-prolyl aminopeptidase 1                                        |
| 1914 | 7999754 | XYLT1     | 2.3997498  | -3.3402 | 0.951094 | 0.0268146 | xylosyltransferase 1                                             |
| 1915 | 8132399 | YAE1D1    | -2.2383873 | -3.5733 | -0.41917 | 0.0373593 | Yae1 domain containing 1                                         |
| 1916 | 7916343 | YIPF1     | -2.0991038 | -3.7681 | -0.69278 | 0.0493965 | Yip1 domain family member 1                                      |
| 1917 | 8114829 | YIPF5     | -2.1019224 | -3.7643 | -0.40434 | 0.0491215 | Yip1 domain family member 5                                      |
| 1918 | 8043725 | ZAP70     | 2.3515015  | -3.4106 | 1.095998 | 0.029635  | zeta chain of T cell receptor associated protein kinase 70       |
| 1919 | 8091887 | ZBBX      | -2.2774106 | -3.5176 | -4.19683 | 0.0345062 | zinc finger B-box domain containing                              |
| 1920 | 8115600 | ZBED8     | -4.2324904 | -0.4742 | -1.43123 | 0.0004503 | zinc finger BED-type containing 8                                |
| 1921 | 8081358 | ZBTB11-AS | -2.5777082 | -3.0753 | -0.6654  | 0.0184371 | ZBTB11 antisense RNA 1                                           |
| 1922 | 7923119 | ZBTB41    | -2.9594802 | -2.487  | -0.74954 | 0.0080493 | zinc finger and BTB domain containing 41                         |
| 1923 | 7977294 | ZBTB42    | -2.6530482 | -2.9611 | -0.62193 | 0.0156944 | zinc finger and BTB domain containing 42                         |
| 1924 | 8039791 | ZBTB45    | -3.2832586 | -1.9752 | -0.62388 | 0.0039085 | zinc finger and BTB domain containing 45                         |
| 1925 | 8067743 | ZBTB46    | 2.4044079  | -3.3333 | 0.50617  | 0.026556  | zinc finger and BTB domain containing 46                         |
| 1926 | 8023212 | ZBTB7C    | -2.1985296 | -3.6297 | -1.10947 | 0.0404958 | zinc finger and BTB domain containing 7C                         |
| 1927 | 7914550 | ZBTB80S   | -2.5355067 | -3.1388 | -0.52598 | 0.0201653 | zinc finger and BTB domain containing 8 opposite strand          |
| 1928 | 8173261 | ZC4H2     | 2.1448085  | -3.7049 | 1.212061 | 0.0451047 | zinc finger C4H2-type containing                                 |
| 1929 | 7916185 | ZCCHC11   | 2.5435074  | -3.1268 | 0.911565 | 0.0198263 | zinc finger CCHC-type containing 11                              |
| 1930 | 8094393 | ZCCHC4    | -2.6568013 | -2.9554 | -0.78008 | 0.0155685 | zinc finger CCHC-type containing 4                               |
| 1931 | 8002029 | ZDHC1     | -2.1168889 | -3.7436 | -0.51518 | 0.0476842 | zinc finger DHHC-type containing 1                               |
| 1932 | 7899253 | ZDHC18/   | 2.4444049  | -3.2744 | 0.520225 | 0.0244291 | zinc finger DHHC-type containing 18//zinc finger DHHC-type conta |
| 1933 | 8131414 | ZDHHC4    | -2.4819087 | -3.2188 | -0.66134 | 0.0225805 | zinc finger DHHC-type containing 4                               |
| 1934 | 7985259 | ZFAND6    | -2.2713874 | -3.5262 | -0.54939 | 0.034933  | zinc finger AN1-type containing 6                                |
| 1935 | 8153043 | ZFAT      | 2.0951855  | -3.7735 | 0.813074 | 0.0497811 | zinc finger and AT-hook domain containing                        |
| 1936 | 8176384 | ZFY       | 2.1338127  | -3.7202 | 0.370903 | 0.0461051 | zinc finger protein, Y-linked                                    |
| 1937 | 7982812 | ZFYVE19   | -2.1335207 | -3.7206 | -0.41801 | 0.0461319 | zinc finger FYVE-type containing 19                              |
| 1938 | 8000399 | ZKSCAN2   | -2.3477914 | -3.416  | -0.92535 | 0.029863  | zinc finger with KRAB and SCAN domains 2                         |
| 1939 | 7915425 | ZMYND12   | -2.1116244 | -3.7509 | -0.91486 | 0.0481854 | zinc finger MYND-type containing 12                              |
| 1940 | 8033789 | ZNF121    | 2.3763375  | -3.3744 | 0.569527 | 0.0281505 | zinc finger protein 121                                          |
| 1941 | 8031744 | ZNF17     | -2.1005057 | -3.7662 | -0.45058 | 0.0492595 | zinc finger protein 17                                           |
| 1942 | 7946288 | ZNF214    | -2.8251392 | -2.6965 | -0.87255 | 0.0108114 | zinc finger protein 214                                          |
| 1943 | 8029347 | ZNF230    | -2.9931449 | -2.4342 | -1.38446 | 0.007472  | zinc finger protein 230                                          |
| 1944 | 8031690 | ZNF264    | -2.1183623 | -3.7416 | -0.38709 | 0.0475448 | zinc finger protein 264                                          |
| 1945 | 8005110 | ZNF286B// | 2.8439491  | -2.6673 | 0.83798  | 0.010376  | zinc finger protein 286B//zinc finger protein 286A               |
| 1946 | 8013305 | ZNF286B// | 2.2692095  | -3.5293 | 0.749211 | 0.0350886 | zinc finger protein 286B//zinc finger protein 286A               |
| 1947 | 7963774 | ZNF385A   | -3.0821939 | -2.294  | -1.17004 | 0.0061316 | zinc finger protein 385A                                         |
| 1948 | 8031962 | ZNF446    | -2.4651796 | -3.2436 | -0.5177  | 0.0233883 | zinc finger protein 446                                          |
| 1949 | 8157105 | ZNF462    | 2.1109528  | -3.7518 | 1.140323 | 0.0482497 | zinc finger protein 462                                          |
| 1950 | 8143749 | ZNF467/// | -2.6103608 | -3.026  | -0.86611 | 0.0171969 | zinc finger protein 467///zinc finger protein 467                |
| 1951 | 7927383 | ZNF488    | 2.3261981  | -3.4473 | 0.51653  | 0.031222  | zinc finger protein 488                                          |
| 1952 | 7928529 | ZNF503    | 2.6462098  | -2.9715 | 0.588144 | 0.0159264 | zinc finger protein 503                                          |
| 1953 | 7934553 | ZNF503    | -2.6185196 | -3.0136 | -1.01286 | 0.0168996 | zinc finger protein 503                                          |
| 1954 | 8022612 | ZNF521    | 3.4845575  | -1.6547 | 1.835924 | 0.0024796 | zinc finger protein 521                                          |
| 1955 | 8031720 | ZNF543    | -2.4113017 | -3.3232 | -0.58741 | 0.0261775 | zinc finger protein 543                                          |
| 1956 | 8031884 | ZNF544    | -2.2058157 | -3.6194 | -0.39996 | 0.039905  | zinc finger protein 544                                          |
| 1957 | 8039687 | ZNF552    | -3.4362266 | -1.7317 | -1.86854 | 0.0027667 | zinc finger protein 552                                          |
| 1958 | 7984203 | ZNF609    | -2.4230911 | -3.3059 | -0.52747 | 0.0255418 | zinc finger protein 609                                          |
| 1959 | 7922686 | ZNF648    | -2.2408753 | -3.5698 | -2.72064 | 0.0371711 | zinc finger protein 648                                          |
| 1960 | 8081069 | ZNF654    | -2.9101364 | -2.5642 | -0.74142 | 0.0089739 | zinc finger protein 654                                          |
| 1961 | 8133042 | ZNF679    | 2.3297702  | -3.4422 | 0.434401 | 0.0309933 | zinc finger protein 679                                          |
| 1962 | 8148615 | ZNF696    | 2.2202996  | -3.599  | 0.387834 | 0.038754  | zinc finger protein 696                                          |
| 1963 | 7919051 | ZNF697    | 2.7413581  | -2.8259 | 0.653511 | 0.0129726 | zinc finger protein 697                                          |
| 1964 | 8145829 | ZNF703    | -3.0434469 | -2.3551 | -1.61734 | 0.0066834 | zinc finger protein 703                                          |
| 1965 | 8088911 | ZNF717    | -2.1101502 | -3.7529 | -0.5883  | 0.0483266 | zinc finger protein 717                                          |
| 1966 | 7987361 | ZNF770    | -2.5213572 | -3.16   | -0.46221 | 0.0207781 | zinc finger protein 770                                          |
| 1967 | 8031815 | ZNF776    | -2.6043723 | -3.035  | -0.47838 | 0.0174183 | zinc finger protein 776                                          |
| 1968 | 8039692 | ZNF814    | -2.458     | -3.2543 | -0.88932 | 0.0237432 | zinc finger protein 814                                          |
| 1969 | 8063723 | ZNF831    | 2.5649596  | -3.0945 | 0.979331 | 0.0189438 | zinc finger protein 831                                          |

|      |                 |            |         |          |           |                                           |
|------|-----------------|------------|---------|----------|-----------|-------------------------------------------|
| 1970 | 8039605 ZNF835  | 2.2604183  | -3.5419 | 0.524625 | 0.0357229 | zinc finger protein 835                   |
| 1971 | 8024934 ZNRF4   | 2.1107571  | -3.7521 | 0.794216 | 0.0482684 | zinc and ring finger 4                    |
| 1972 | 8022872 ZSCAN30 | -2.240556  | -3.5702 | -0.56016 | 0.0371952 | zinc finger and SCAN domain containing 30 |
| 1973 | 7896571         | -5.1097653 | 0.8363  | -7.99641 | 0.0000622 |                                           |
| 1974 | 7893161         | -4.4506494 | -0.1386 | -6.67867 | 0.000274  |                                           |
| 1975 | 7892743         | -4.3105245 | -0.3535 | -6.04747 | 0.0003769 |                                           |
| 1976 | 7896604         | -4.1561098 | -0.5929 | -5.4606  | 0.000536  |                                           |
| 1977 | 7894123         | -4.1414273 | -0.6158 | -5.55989 | 0.0005543 |                                           |
| 1978 | 8161418         | -4.0239707 | -0.7996 | -1.21213 | 0.0007249 |                                           |
| 1979 | 7937977         | -3.9991891 | -0.8385 | -0.99569 | 0.0007671 |                                           |
| 1980 | 7893671         | -3.9935711 | -0.8473 | -5.72545 | 0.000777  |                                           |
| 1981 | 7893894         | -3.8930902 | -1.0057 | -1.22885 | 0.0009775 |                                           |
| 1982 | 7896014         | -3.7780141 | -1.1878 | -4.01688 | 0.0012713 |                                           |
| 1983 | 8023308         | -3.7729802 | -1.1958 | -1.17539 | 0.001286  |                                           |
| 1984 | 8124057         | -3.7517631 | -1.2294 | -6.9413  | 0.0013498 |                                           |
| 1985 | 7895713         | -3.7150944 | -1.2877 | -4.65343 | 0.0014675 |                                           |
| 1986 | 8122125         | -3.714625  | -1.2884 | -1.10389 | 0.0014691 |                                           |
| 1987 | 8037760         | -3.6930453 | -1.3227 | -7.45878 | 0.0015432 |                                           |
| 1988 | 7895857         | -3.6831532 | -1.3384 | -0.76497 | 0.0015784 |                                           |
| 1989 | 7896703         | 3.6742169  | -1.3526 | 2.043324 | 0.0016109 |                                           |
| 1990 | 8083407         | -3.6737553 | -1.3534 | -5.86183 | 0.0016126 |                                           |
| 1991 | 7894171         | -3.6700688 | -1.3592 | -0.59367 | 0.0016262 |                                           |
| 1992 | 8059339         | 3.6480997  | -1.3942 | 0.79938  | 0.0017096 |                                           |
| 1993 | 7894778         | -3.6234732 | -1.4334 | -6.85888 | 0.0018082 |                                           |
| 1994 | 7894321         | 3.6223654  | -1.4351 | 1.029299 | 0.0018128 |                                           |
| 1995 | 7950724         | -3.600097  | -1.4706 | -6.19418 | 0.0019071 |                                           |
| 1996 | 8139121         | 3.5746598  | -1.5111 | 1.550797 | 0.0020207 |                                           |
| 1997 | 8102781         | -3.5214715 | -1.5958 | -1.1908  | 0.0022803 |                                           |
| 1998 | 7894921         | -3.512824  | -1.6096 | -2.75311 | 0.0023255 |                                           |
| 1999 | 7927058         | -3.5012355 | -1.6281 | -4.89585 | 0.0023875 |                                           |
| 2000 | 8146788         | -3.4911838 | -1.6441 | -1.0818  | 0.0024426 |                                           |
| 2001 | 8043446         | 3.4517033  | -1.707  | 2.454731 | 0.0026714 |                                           |
| 2002 | 7896687         | 3.4424907  | -1.7217 | 2.016261 | 0.0027277 |                                           |
| 2003 | 8175662         | -3.441201  | -1.7237 | -4.42095 | 0.0027357 |                                           |
| 2004 | 8097011         | 3.433012   | -1.7368 | 0.886882 | 0.0027869 |                                           |
| 2005 | 8139031         | -3.4303131 | -1.7411 | -0.96991 | 0.002804  |                                           |
| 2006 | 7934613         | -3.4123157 | -1.7698 | -5.32173 | 0.0029206 |                                           |
| 2007 | 7960813         | -3.4105812 | -1.7725 | -5.53078 | 0.0029321 |                                           |
| 2008 | 7933088         | -3.4074485 | -1.7775 | -2.03656 | 0.002953  |                                           |
| 2009 | 8130027         | -3.4039086 | -1.7832 | -1.73541 | 0.0029767 |                                           |
| 2010 | 8070169         | 3.3864364  | -1.811  | 1.023433 | 0.0030967 |                                           |
| 2011 | 7892879         | -3.3855997 | -1.8123 | -1.8818  | 0.0031026 |                                           |
| 2012 | 8180239         | -3.3769154 | -1.8262 | -1.0085  | 0.0031641 |                                           |
| 2013 | 7892780         | -3.3702035 | -1.8368 | -1.63436 | 0.0032124 |                                           |
| 2014 | 7999384         | -3.3636916 | -1.8472 | -1.7157  | 0.0032601 |                                           |
| 2015 | 7893453         | -3.361842  | -1.8502 | -0.61219 | 0.0032737 |                                           |
| 2016 | 7906751         | -3.3473595 | -1.8732 | -5.24961 | 0.0033825 |                                           |
| 2017 | 7944829         | -3.3343167 | -1.894  | -0.61017 | 0.0034836 |                                           |
| 2018 | 7976146         | -3.3280906 | -1.9039 | -3.3816  | 0.0035329 |                                           |
| 2019 | 7923162         | -3.3266415 | -1.9062 | -2.19962 | 0.0035444 |                                           |
| 2020 | 7919049         | 3.3215856  | -1.9143 | 0.701635 | 0.0035851 |                                           |
| 2021 | 8124327         | 3.3092298  | -1.9339 | 0.694444 | 0.0036864 |                                           |
| 2022 | 7893627         | -3.3039967 | -1.9422 | -0.92846 | 0.0037301 |                                           |
| 2023 | 8043098         | -3.2951513 | -1.9563 | -4.97665 | 0.0038052 |                                           |
| 2024 | 8132988         | -3.2932675 | -1.9593 | -1.86831 | 0.0038214 |                                           |
| 2025 | 7894637         | -3.2754734 | -1.9876 | -0.72943 | 0.0039776 |                                           |
| 2026 | 7896625         | -3.26694   | -2.0012 | -0.77388 | 0.0040547 |                                           |
| 2027 | 7894081         | -3.2629393 | -2.0075 | -1.24321 | 0.0040913 |                                           |
| 2028 | 7998927         | -3.2537915 | -2.0221 | -4.43621 | 0.0041764 |                                           |
| 2029 | 8059714         | -3.2427966 | -2.0395 | -1.72696 | 0.0042808 |                                           |
| 2030 | 8058660         | -3.2291904 | -2.0611 | -1.55394 | 0.0044137 |                                           |
| 2031 | 8117286         | 3.228724   | -2.0619 | 0.677791 | 0.0044183 |                                           |
| 2032 | 8013259         | 3.2062829  | -2.0975 | 0.651727 | 0.0046465 |                                           |
| 2033 | 8136457         | -3.1985174 | -2.1098 | -4.3616  | 0.0047281 |                                           |
| 2034 | 7910636         | -3.1687467 | -2.157  | -0.62224 | 0.0050542 |                                           |
| 2035 | 8044611         | 3.1641873  | -2.1643 | 1.428363 | 0.005106  |                                           |
| 2036 | 7974027         | -3.1526455 | -2.1825 | -4.83268 | 0.0052396 |                                           |
| 2037 | 7894515         | 3.1502084  | -2.1864 | 0.776662 | 0.0052682 |                                           |
| 2038 | 7892752         | 3.1312558  | -2.2164 | 1.546991 | 0.0054961 |                                           |
| 2039 | 7896039         | -3.1213526 | -2.2321 | -1.1336  | 0.005619  |                                           |
| 2040 | 8111415         | -3.1103335 | -2.2495 | -1.41941 | 0.0057589 |                                           |
| 2041 | 7896695         | 3.1092711  | -2.2512 | 1.958178 | 0.0057725 |                                           |
| 2042 | 8043456         | 3.0974469  | -2.2699 | 1.530565 | 0.0059268 |                                           |

|      |         |            |         |          |           |
|------|---------|------------|---------|----------|-----------|
| 2043 | 7896524 | 3.0960108  | -2.2721 | 0.974298 | 0.0059458 |
| 2044 | 8004802 | 3.0905318  | -2.2808 | 0.89274  | 0.0060188 |
| 2045 | 8068218 | 3.088218   | -2.2844 | 0.635039 | 0.0060499 |
| 2046 | 7984014 | 3.0760517  | -2.3036 | 0.773048 | 0.006216  |
| 2047 | 7896422 | -3.0754637 | -2.3046 | -0.5712  | 0.0062242 |
| 2048 | 8161854 | -3.0667657 | -2.3183 | -1.3192  | 0.0063458 |
| 2049 | 8053715 | 3.0539662  | -2.3385 | 1.608755 | 0.006529  |
| 2050 | 8139767 | -3.0494263 | -2.3456 | -1.7791  | 0.0065952 |
| 2051 | 8083790 | -3.0454132 | -2.352  | -0.92669 | 0.0066543 |
| 2052 | 8118098 | 3.0444394  | -2.3535 | 0.517679 | 0.0066687 |
| 2053 | 8045810 | -3.0436298 | -2.3548 | -1.7244  | 0.0066807 |
| 2054 | 8104070 | -3.0434167 | -2.3551 | -0.87391 | 0.0066839 |
| 2055 | 8035080 | 3.0416571  | -2.3579 | 1.288593 | 0.00671   |
| 2056 | 8091883 | -3.0405571 | -2.3596 | -5.77511 | 0.0067264 |
| 2057 | 8101716 | -3.0373748 | -2.3646 | -0.94772 | 0.0067741 |
| 2058 | 8081217 | -3.0181839 | -2.3948 | -1.31661 | 0.0070688 |
| 2059 | 7896312 | -3.0066737 | -2.4129 | -0.78574 | 0.0072515 |
| 2060 | 7911213 | -2.9998906 | -2.4236 | -1.51365 | 0.0073612 |
| 2061 | 7894118 | -2.9894976 | -2.4399 | -0.58247 | 0.0075325 |
| 2062 | 7896555 | -2.9875795 | -2.4429 | -4.19248 | 0.0075646 |
| 2063 | 7896137 | 2.9832215  | -2.4498 | 0.815674 | 0.0076379 |
| 2064 | 7895202 | -2.9800376 | -2.4548 | -0.83106 | 0.0076918 |
| 2065 | 7917739 | -2.9793924 | -2.4558 | -1.32367 | 0.0077028 |
| 2066 | 7895577 | 2.9769494  | -2.4596 | 0.483284 | 0.0077445 |
| 2067 | 7969058 | 2.9751808  | -2.4624 | 0.82243  | 0.0077749 |
| 2068 | 8139055 | 2.9673432  | -2.4747 | 0.763312 | 0.0079107 |
| 2069 | 7923956 | 2.9458309  | -2.5084 | 0.582888 | 0.0082954 |
| 2070 | 7893347 | -2.937736  | -2.5211 | -5.83661 | 0.0084448 |
| 2071 | 7892874 | -2.9324776 | -2.5293 | -2.26245 | 0.0085432 |
| 2072 | 7917695 | -2.9068698 | -2.5693 | -0.98478 | 0.0090386 |
| 2073 | 8172195 | -2.9030046 | -2.5754 | -6.35347 | 0.0091157 |
| 2074 | 7964260 | -2.898287  | -2.5827 | -0.56534 | 0.0092107 |
| 2075 | 7894834 | -2.8927869 | -2.5913 | -0.63179 | 0.0093227 |
| 2076 | 7919566 | -2.877559  | -2.615  | -0.79043 | 0.0096395 |
| 2077 | 8088893 | 2.8679647  | -2.63   | 0.565214 | 0.0098445 |
| 2078 | 8061092 | -2.8619918 | -2.6393 | -0.82755 | 0.0099742 |
| 2079 | 8022426 | 2.8468609  | -2.6628 | 1.070956 | 0.0103101 |
| 2080 | 7893132 | -2.8459429 | -2.6642 | -0.96709 | 0.0103308 |
| 2081 | 8074192 | -2.8429478 | -2.6689 | -1.78516 | 0.0103987 |
| 2082 | 7893568 | -2.8339493 | -2.6829 | -0.80775 | 0.0106053 |
| 2083 | 7893179 | -2.8324385 | -2.6852 | -5.29924 | 0.0106404 |
| 2084 | 7894190 | -2.8318372 | -2.6861 | -3.85473 | 0.0106544 |
| 2085 | 8043426 | 2.8309442  | -2.6875 | 1.09637  | 0.0106752 |
| 2086 | 8112996 | -2.8276843 | -2.6926 | -5.84611 | 0.0107515 |
| 2087 | 7894635 | -2.8167323 | -2.7096 | -0.96833 | 0.0110116 |
| 2088 | 8139786 | -2.8148812 | -2.7124 | -4.90234 | 0.0110562 |
| 2089 | 7895831 | -2.8104109 | -2.7194 | -0.66812 | 0.0111645 |
| 2090 | 8113467 | -2.8102453 | -2.7196 | -0.52966 | 0.0111685 |
| 2091 | 8084605 | -2.808267  | -2.7227 | -4.58184 | 0.0112168 |
| 2092 | 8176931 | 2.8070935  | -2.7245 | 0.862153 | 0.0112456 |
| 2093 | 8177403 | 2.8070935  | -2.7245 | 0.862153 | 0.0112456 |
| 2094 | 7894579 | -2.8066274 | -2.7252 | -0.52849 | 0.011257  |
| 2095 | 8045559 | 2.8045444  | -2.7284 | 0.786914 | 0.0113082 |
| 2096 | 8053662 | -2.792903  | -2.7464 | -0.42352 | 0.0115987 |
| 2097 | 8121317 | -2.7903467 | -2.7504 | -1.70012 | 0.0116634 |
| 2098 | 8176677 | 2.784445   | -2.7595 | 0.799875 | 0.0118141 |
| 2099 | 8177178 | 2.784445   | -2.7595 | 0.799875 | 0.0118141 |
| 2100 | 8023373 | -2.7811776 | -2.7646 | -4.05762 | 0.0118984 |
| 2101 | 8002301 | -2.775676  | -2.7731 | -0.79888 | 0.0120416 |
| 2102 | 8161863 | -2.7695341 | -2.7825 | -0.8641  | 0.0122034 |
| 2103 | 7895101 | -2.7691156 | -2.7832 | -0.58741 | 0.0122145 |
| 2104 | 7893815 | -2.7688783 | -2.7836 | -0.50806 | 0.0122208 |
| 2105 | 8095035 | 2.7686496  | -2.7839 | 4.899246 | 0.0122268 |
| 2106 | 7976552 | -2.7680479 | -2.7848 | -3.10293 | 0.0122428 |
| 2107 | 7966568 | -2.7668859 | -2.7866 | -1.1965  | 0.0122738 |
| 2108 | 8036881 | -2.7624185 | -2.7935 | -0.8102  | 0.0123934 |
| 2109 | 7965671 | -2.7612763 | -2.7953 | -0.84033 | 0.0124242 |
| 2110 | 8150590 | -2.7571193 | -2.8017 | -3.82579 | 0.0125368 |
| 2111 | 8089873 | -2.7552592 | -2.8045 | -2.68569 | 0.0125875 |
| 2112 | 7896724 | 2.7543196  | -2.806  | 6.295223 | 0.0126132 |
| 2113 | 8168565 | -2.7540308 | -2.8064 | -3.4946  | 0.0126211 |
| 2114 | 7892952 | -2.748324  | -2.8152 | -0.64303 | 0.0127782 |
| 2115 | 8043423 | 2.7477471  | -2.8161 | 2.826347 | 0.0127942 |

|      |         |            |         |          |           |
|------|---------|------------|---------|----------|-----------|
| 2116 | 7897995 | -2.7431548 | -2.8232 | -3.30014 | 0.0129222 |
| 2117 | 7912589 | -2.7431548 | -2.8232 | -3.30014 | 0.0129222 |
| 2118 | 8043443 | 2.7395667  | -2.8287 | 1.365925 | 0.013023  |
| 2119 | 8180240 | -2.7327554 | -2.8392 | -0.95431 | 0.0132166 |
| 2120 | 7971711 | -2.7294724 | -2.8442 | -0.57533 | 0.0133108 |
| 2121 | 7957606 | -2.7284436 | -2.8458 | -0.57363 | 0.0133405 |
| 2122 | 8002379 | -2.7273003 | -2.8476 | -0.60273 | 0.0133735 |
| 2123 | 7893012 | -2.7190503 | -2.8602 | -0.40632 | 0.0136142 |
| 2124 | 7894383 | 2.7186679  | -2.8608 | 1.426351 | 0.0136255 |
| 2125 | 8040336 | -2.7169353 | -2.8635 | -2.40663 | 0.0136766 |
| 2126 | 8020666 | 2.7137842  | -2.8683 | 0.714878 | 0.0137701 |
| 2127 | 7896367 | -2.7101409 | -2.8739 | -0.53059 | 0.0138789 |
| 2128 | 7905037 | 2.7076926  | -2.8776 | 0.698836 | 0.0139524 |
| 2129 | 8123362 | -2.7061549 | -2.88   | -0.712   | 0.0139988 |
| 2130 | 8173671 | -2.701564  | -2.887  | -0.80989 | 0.0141382 |
| 2131 | 8151540 | -2.6999952 | -2.8894 | -0.32334 | 0.0141862 |
| 2132 | 8073680 | -2.6995531 | -2.8901 | -1.30002 | 0.0141997 |
| 2133 | 7996945 | 2.6961345  | -2.8953 | 1.190631 | 0.0143048 |
| 2134 | 7892921 | -2.6920509 | -2.9016 | -1.50479 | 0.0144313 |
| 2135 | 7896015 | -2.6912304 | -2.9028 | -3.96632 | 0.0144569 |
| 2136 | 7895117 | 2.6878396  | -2.908  | 0.898886 | 0.0145629 |
| 2137 | 7929130 | -2.6788571 | -2.9218 | -0.6442  | 0.0148474 |
| 2138 | 8065120 | -2.678066  | -2.923  | -0.87573 | 0.0148727 |
| 2139 | 7894618 | 2.6769563  | -2.9247 | 0.998944 | 0.0149082 |
| 2140 | 7895039 | -2.6767974 | -2.9249 | -0.45416 | 0.0149133 |
| 2141 | 7893552 | 2.6728098  | -2.931  | 0.883284 | 0.0150418 |
| 2142 | 8042460 | -2.6690137 | -2.9368 | -1.58369 | 0.0151652 |
| 2143 | 7893864 | -2.663212  | -2.9456 | -3.37551 | 0.0153555 |
| 2144 | 8041711 | -2.6599243 | -2.9506 | -0.92969 | 0.0154644 |
| 2145 | 7894657 | -2.6586493 | -2.9526 | -0.59236 | 0.0155068 |
| 2146 | 8067199 | -2.6565258 | -2.9558 | -0.68854 | 0.0155777 |
| 2147 | 7896719 | 2.6513246  | -2.9637 | 1.279429 | 0.0157526 |
| 2148 | 8044572 | -2.6499413 | -2.9659 | -0.94063 | 0.0157994 |
| 2149 | 8122856 | -2.6434677 | -2.9757 | -2.48667 | 0.0160204 |
| 2150 | 7895485 | -2.6428315 | -2.9767 | -5.27535 | 0.0160422 |
| 2151 | 7895404 | -2.6409488 | -2.9795 | -1.31492 | 0.0161071 |
| 2152 | 7895541 | -2.6408815 | -2.9796 | -1.72965 | 0.0161095 |
| 2153 | 8102783 | 2.6350113  | -2.9886 | 0.687414 | 0.0163134 |
| 2154 | 7894080 | -2.631878  | -2.9933 | -0.6668  | 0.0164233 |
| 2155 | 7942910 | -2.6316636 | -2.9936 | -0.62685 | 0.0164308 |
| 2156 | 7896108 | -2.6313001 | -2.9942 | -0.61029 | 0.0164436 |
| 2157 | 8114191 | -2.6288196 | -2.998  | -2.84748 | 0.0165312 |
| 2158 | 7942822 | 2.6281523  | -2.999  | 1.848382 | 0.0165548 |
| 2159 | 7979129 | 2.6227912  | -3.0071 | 0.668077 | 0.0167459 |
| 2160 | 7892946 | -2.6174721 | -3.0152 | -0.8401  | 0.0169375 |
| 2161 | 7894136 | -2.6174323 | -3.0152 | -0.52363 | 0.0169389 |
| 2162 | 8078134 | 2.6167053  | -3.0163 | 5.948119 | 0.0169653 |
| 2163 | 7893400 | -2.6161396 | -3.0172 | -1.19944 | 0.0169858 |
| 2164 | 8124192 | 2.5989591  | -3.0432 | 0.823653 | 0.0176207 |
| 2165 | 8046755 | 2.5948671  | -3.0494 | 0.630338 | 0.0177752 |
| 2166 | 8121390 | -2.5944479 | -3.05   | -3.07749 | 0.0177911 |
| 2167 | 7919564 | 2.5927959  | -3.0525 | 0.623986 | 0.0178539 |
| 2168 | 7894185 | -2.5927356 | -3.0526 | -0.55631 | 0.0178562 |
| 2169 | 8143205 | 2.592165   | -3.0535 | 0.671111 | 0.0178779 |
| 2170 | 8058159 | -2.5876142 | -3.0604 | -0.77161 | 0.0180522 |
| 2171 | 8124636 | 2.5874308  | -3.0606 | 0.825488 | 0.0180592 |
| 2172 | 7932508 | -2.5861298 | -3.0626 | -3.61522 | 0.0181094 |
| 2173 | 7893312 | 2.5856538  | -3.0633 | 5.070371 | 0.0181277 |
| 2174 | 8029375 | -2.583795  | -3.0661 | -1.10729 | 0.0181997 |
| 2175 | 7960434 | 2.5830893  | -3.0672 | 0.560118 | 0.018227  |
| 2176 | 8176373 | 2.5828147  | -3.0676 | 0.434256 | 0.0182377 |
| 2177 | 8173627 | -2.5757004 | -3.0783 | -0.76985 | 0.018516  |
| 2178 | 7894166 | -2.5756353 | -3.0784 | -5.49431 | 0.0185186 |
| 2179 | 8045319 | -2.5742674 | -3.0805 | -1.669   | 0.0185726 |
| 2180 | 8055234 | -2.5742674 | -3.0805 | -1.669   | 0.0185726 |
| 2181 | 7911110 | -2.5736371 | -3.0814 | -1.13648 | 0.0185975 |
| 2182 | 7894936 | -2.5723794 | -3.0833 | -2.85866 | 0.0186473 |
| 2183 | 7971561 | 2.5696944  | -3.0874 | 0.541422 | 0.0187541 |
| 2184 | 7997228 | 2.5676236  | -3.0905 | 0.83249  | 0.0188369 |
| 2185 | 7925902 | 2.5633533  | -3.0969 | 0.562133 | 0.0190086 |
| 2186 | 7895015 | -2.5619168 | -3.0991 | -0.9684  | 0.0190667 |
| 2187 | 8082795 | -2.5592104 | -3.1032 | -1.08149 | 0.0191766 |
| 2188 | 7893994 | -2.5568907 | -3.1067 | -1.82074 | 0.0192713 |

|      |         |            |         |          |           |
|------|---------|------------|---------|----------|-----------|
| 2189 | 7894173 | -2.556539  | -3.1072 | -0.72928 | 0.0192857 |
| 2190 | 7895766 | 2.5540499  | -3.1109 | 0.370062 | 0.0193879 |
| 2191 | 8081113 | -2.5487859 | -3.1188 | -0.55076 | 0.0196057 |
| 2192 | 7916998 | -2.5453681 | -3.124  | -2.94599 | 0.0197483 |
| 2193 | 8150163 | -2.5452189 | -3.1242 | -1.31029 | 0.0197545 |
| 2194 | 7895657 | -2.5448443 | -3.1248 | -0.367   | 0.0197702 |
| 2195 | 7894463 | -2.5447408 | -3.1249 | -0.84543 | 0.0197746 |
| 2196 | 7895564 | -2.5440228 | -3.126  | -4.22188 | 0.0198047 |
| 2197 | 8148206 | -2.5429293 | -3.1276 | -4.41231 | 0.0198506 |
| 2198 | 7893688 | -2.538231  | -3.1347 | -2.34359 | 0.0200493 |
| 2199 | 7896698 | 2.5337884  | -3.1413 | 1.045837 | 0.0202388 |
| 2200 | 7893197 | -2.5323457 | -3.1435 | -4.62278 | 0.0203007 |
| 2201 | 8053364 | 2.5305704  | -3.1462 | 0.648143 | 0.0203771 |
| 2202 | 7925432 | 2.5297922  | -3.1473 | 5.580358 | 0.0204107 |
| 2203 | 7893667 | -2.5297293 | -3.1474 | -2.41392 | 0.0204134 |
| 2204 | 8043476 | 2.5265647  | -3.1522 | 1.978085 | 0.0205506 |
| 2205 | 8005630 | 2.5238089  | -3.1563 | 1.145031 | 0.0206707 |
| 2206 | 7910913 | -2.5211242 | -3.1603 | -1.75906 | 0.0207884 |
| 2207 | 8017141 | 2.5201392  | -3.1618 | 1.61065  | 0.0208317 |
| 2208 | 7894360 | -2.5179839 | -3.165  | -0.71294 | 0.0209268 |
| 2209 | 7948371 | 2.515455   | -3.1688 | 0.741588 | 0.0210389 |
| 2210 | 8131612 | -2.5115068 | -3.1747 | -0.71707 | 0.0212151 |
| 2211 | 7946426 | -2.5111694 | -3.1752 | -0.6713  | 0.0212302 |
| 2212 | 7895529 | -2.506766  | -3.1818 | -4.53313 | 0.0214284 |
| 2213 | 8014142 | -2.5046823 | -3.1849 | -1.08226 | 0.0215228 |
| 2214 | 8053690 | 2.5034346  | -3.1867 | 1.792684 | 0.0215795 |
| 2215 | 7896489 | 2.4999436  | -3.1919 | 0.8905   | 0.021739  |
| 2216 | 8136656 | -2.4995124 | -3.1926 | -1.86342 | 0.0217588 |
| 2217 | 7896119 | -2.4985401 | -3.194  | -2.5525  | 0.0218034 |
| 2218 | 8019561 | -2.4962834 | -3.1974 | -3.58204 | 0.0219073 |
| 2219 | 8088546 | -2.4939529 | -3.2009 | -1.46146 | 0.0220152 |
| 2220 | 8096897 | -2.493767  | -3.2011 | -0.5896  | 0.0220238 |
| 2221 | 8168674 | -2.4936419 | -3.2013 | -1.48629 | 0.0220296 |
| 2222 | 8071658 | 2.4912287  | -3.2049 | 1.884444 | 0.0221419 |
| 2223 | 8046512 | -2.4909956 | -3.2053 | -0.9599  | 0.0221527 |
| 2224 | 7893526 | 2.4899613  | -3.2068 | 1.832181 | 0.022201  |
| 2225 | 7974164 | -2.4878048 | -3.21   | -1.57978 | 0.0223021 |
| 2226 | 8152090 | -2.4870677 | -3.2111 | -0.82901 | 0.0223367 |
| 2227 | 7954102 | 2.485488   | -3.2135 | 1.481555 | 0.0224111 |
| 2228 | 8103458 | -2.4851528 | -3.214  | -3.42643 | 0.0224269 |
| 2229 | 7993798 | -2.4836569 | -3.2162 | -3.5866  | 0.0224976 |
| 2230 | 8042115 | -2.4828688 | -3.2174 | -1.35533 | 0.0225349 |
| 2231 | 8147564 | -2.4826049 | -3.2178 | -4.4169  | 0.0225474 |
| 2232 | 7896498 | -2.4822639 | -3.2183 | -0.42931 | 0.0225636 |
| 2233 | 7893371 | -2.4819126 | -3.2188 | -0.39014 | 0.0225803 |
| 2234 | 8058668 | -2.4818771 | -3.2188 | -1.17128 | 0.022582  |
| 2235 | 8106401 | 2.4808133  | -3.2204 | 0.577021 | 0.0226326 |
| 2236 | 8141303 | 2.4729825  | -3.2321 | 0.868383 | 0.0230082 |
| 2237 | 8084215 | 2.4695895  | -3.2371 | 0.506262 | 0.0231727 |
| 2238 | 7893174 | -2.4640656 | -3.2453 | -1.74819 | 0.023443  |
| 2239 | 7942525 | 2.4627683  | -3.2472 | 0.46435  | 0.0235069 |
| 2240 | 8089928 | 2.4585418  | -3.2535 | 0.585853 | 0.0237162 |
| 2241 | 8136159 | -2.4578951 | -3.2544 | -1.29635 | 0.0237484 |
| 2242 | 7901383 | -2.456715  | -3.2562 | -1.28261 | 0.0238072 |
| 2243 | 8054090 | 2.4532484  | -3.2613 | 0.574537 | 0.0239808 |
| 2244 | 7896713 | 2.452327   | -3.2627 | 0.462984 | 0.0240272 |
| 2245 | 8155024 | 2.4473645  | -3.27   | 0.541218 | 0.0242782 |
| 2246 | 7896473 | -2.4473525 | -3.27   | -3.3913  | 0.0242788 |
| 2247 | 8137470 | 2.4471288  | -3.2704 | 0.730713 | 0.0242902 |
| 2248 | 8174977 | 2.4457638  | -3.2724 | 0.558721 | 0.0243597 |
| 2249 | 8124036 | -2.442511  | -3.2772 | -2.72677 | 0.0245261 |
| 2250 | 8158511 | 2.441831   | -3.2782 | 0.51713  | 0.024561  |
| 2251 | 7896030 | -2.4405488 | -3.2801 | -0.41129 | 0.024627  |
| 2252 | 8146837 | 2.4403358  | -3.2804 | 0.910432 | 0.024638  |
| 2253 | 7896716 | 2.4400317  | -3.2809 | 1.021214 | 0.0246536 |
| 2254 | 7895911 | -2.4387853 | -3.2827 | -0.41837 | 0.024718  |
| 2255 | 7894294 | -2.4372648 | -3.285  | -0.41684 | 0.0247967 |
| 2256 | 8002018 | -2.4355997 | -3.2874 | -0.63464 | 0.0248832 |
| 2257 | 8001102 | 2.4313284  | -3.2937 | 1.540279 | 0.0251063 |
| 2258 | 7895982 | -2.4307634 | -3.2945 | -0.38329 | 0.0251359 |
| 2259 | 7894211 | -2.4302699 | -3.2953 | -0.52344 | 0.0251619 |
| 2260 | 8146754 | -2.4298204 | -3.2959 | -0.64472 | 0.0251855 |
| 2261 | 7943517 | -2.4285526 | -3.2978 | -1.02703 | 0.0252523 |



|      |         |            |         |          |           |
|------|---------|------------|---------|----------|-----------|
| 2262 | 8089230 | 2.428318   | -3.2982 | 0.456187 | 0.0252646 |
| 2263 | 7986567 | 2.426768   | -3.3004 | 0.517216 | 0.0253465 |
| 2264 | 7986633 | 2.426768   | -3.3004 | 0.517216 | 0.0253465 |
| 2265 | 7894815 | -2.4250923 | -3.3029 | -0.71559 | 0.0254354 |
| 2266 | 7892605 | -2.4242199 | -3.3042 | -0.54861 | 0.0254817 |
| 2267 | 8061112 | 2.4233645  | -3.3054 | 0.553504 | 0.0255273 |
| 2268 | 7896653 | -2.4219292 | -3.3076 | -0.51394 | 0.0256038 |
| 2269 | 7895843 | -2.4215118 | -3.3082 | -1.19169 | 0.0256261 |
| 2270 | 7990652 | 2.4213075  | -3.3085 | 0.724354 | 0.0256371 |
| 2271 | 8132413 | -2.4204001 | -3.3098 | -2.96228 | 0.0256856 |
| 2272 | 8085529 | -2.4195187 | -3.3111 | -0.97792 | 0.0257329 |
| 2273 | 7932304 | 2.4192341  | -3.3115 | 5.579525 | 0.0257482 |
| 2274 | 7894157 | -2.4190085 | -3.3119 | -4.39002 | 0.0257603 |
| 2275 | 7895242 | -2.4172014 | -3.3145 | -3.33167 | 0.0258576 |
| 2276 | 7894345 | -2.4171654 | -3.3146 | -3.13683 | 0.0258595 |
| 2277 | 7893216 | -2.4119149 | -3.3223 | -0.65622 | 0.0261441 |
| 2278 | 8045347 | -2.4116535 | -3.3227 | -3.27002 | 0.0261583 |
| 2279 | 8109526 | 2.4115612  | -3.3228 | 0.588772 | 0.0261633 |
| 2280 | 8151250 | -2.4097055 | -3.3255 | -0.7914  | 0.0262647 |
| 2281 | 7894492 | 2.4096667  | -3.3256 | 0.470388 | 0.0262668 |
| 2282 | 7919390 | -2.4087328 | -3.327  | -1.08585 | 0.0263179 |
| 2283 | 8083848 | -2.4084437 | -3.3274 | -1.15683 | 0.0263338 |
| 2284 | 7893563 | -2.4079422 | -3.3281 | -1.27284 | 0.0263613 |
| 2285 | 8072411 | 2.4075229  | -3.3288 | 0.520005 | 0.0263843 |
| 2286 | 7893806 | 2.4064536  | -3.3303 | 0.598339 | 0.0264431 |
| 2287 | 7893772 | -2.4039024 | -3.3341 | -0.95352 | 0.0265839 |
| 2288 | 8019958 | -2.4035089 | -3.3346 | -2.92834 | 0.0266057 |
| 2289 | 8009299 | -2.4021594 | -3.3366 | -0.83574 | 0.0266805 |
| 2290 | 7952675 | 2.3995584  | -3.3404 | 0.563223 | 0.0268253 |
| 2291 | 7895896 | -2.3986575 | -3.3418 | -3.15121 | 0.0268756 |
| 2292 | 7894351 | 2.3958676  | -3.3459 | 0.581768 | 0.027032  |
| 2293 | 7895272 | -2.3958042 | -3.3459 | -0.39837 | 0.0270355 |
| 2294 | 7895808 | 2.3919083  | -3.3517 | 0.456641 | 0.0272553 |
| 2295 | 7956987 | -2.3919062 | -3.3517 | -0.46855 | 0.0272554 |
| 2296 | 7896221 | -2.391836  | -3.3518 | -0.59706 | 0.0272594 |
| 2297 | 8005759 | -2.3876508 | -3.3579 | -0.75606 | 0.0274974 |
| 2298 | 8103873 | 2.3852764  | -3.3614 | 1.17771  | 0.0276333 |
| 2299 | 8099756 | -2.3849126 | -3.3619 | -0.41671 | 0.0276542 |
| 2300 | 8146305 | -2.3839805 | -3.3633 | -0.47397 | 0.0277077 |
| 2301 | 8047765 | -2.3815201 | -3.3669 | -0.58656 | 0.0278495 |
| 2302 | 8102726 | -2.3810946 | -3.3675 | -4.89175 | 0.0278741 |
| 2303 | 8121416 | -2.3808037 | -3.3679 | -1.88864 | 0.0278909 |
| 2304 | 7942989 | -2.3805482 | -3.3683 | -0.67689 | 0.0279057 |
| 2305 | 7895331 | 2.3803841  | -3.3685 | 1.709153 | 0.0279152 |
| 2306 | 7893963 | -2.3802517 | -3.3687 | -3.65767 | 0.0279229 |
| 2307 | 7896715 | 2.3796619  | -3.3696 | 1.740888 | 0.0279571 |
| 2308 | 7892770 | 2.3779036  | -3.3721 | 0.608488 | 0.0280592 |
| 2309 | 8107090 | 2.3750374  | -3.3763 | 0.318382 | 0.0282264 |
| 2310 | 7895442 | -2.3740205 | -3.3778 | -2.02224 | 0.028286  |
| 2311 | 7895259 | 2.3735115  | -3.3786 | 0.762917 | 0.0283158 |
| 2312 | 8064926 | -2.3714613 | -3.3816 | -2.3446  | 0.0284364 |
| 2313 | 7931926 | 2.3687007  | -3.3856 | 0.636081 | 0.0285994 |
| 2314 | 8174251 | -2.366929  | -3.3882 | -0.55297 | 0.0287045 |
| 2315 | 7892846 | -2.3652309 | -3.3906 | -0.3656  | 0.0288056 |
| 2316 | 8130209 | -2.3648789 | -3.3912 | -4.10872 | 0.0288266 |
| 2317 | 8106528 | 2.3603503  | -3.3978 | 0.454514 | 0.029098  |
| 2318 | 7896563 | 2.3601462  | -3.398  | 0.619242 | 0.0291102 |
| 2319 | 8166872 | 2.3594926  | -3.399  | 0.923984 | 0.0291496 |
| 2320 | 7895945 | -2.3590038 | -3.3997 | -0.65515 | 0.0291791 |
| 2321 | 8043470 | 2.3588992  | -3.3999 | 2.1296   | 0.0291854 |
| 2322 | 7907968 | -2.3583131 | -3.4007 | -4.41668 | 0.0292208 |
| 2323 | 8117032 | -2.3570005 | -3.4026 | -1.40709 | 0.0293002 |
| 2324 | 8100576 | 2.3537769  | -3.4073 | 5.295926 | 0.0294961 |
| 2325 | 8092220 | -2.3536676 | -3.4075 | -0.584   | 0.0295027 |
| 2326 | 7893236 | 2.3534674  | -3.4078 | 0.38289  | 0.0295149 |
| 2327 | 8036025 | -2.349487  | -3.4136 | -1.33237 | 0.0297586 |
| 2328 | 7894942 | -2.3489603 | -3.4143 | -4.73626 | 0.029791  |
| 2329 | 7894727 | -2.348942  | -3.4144 | -0.56416 | 0.0297921 |
| 2330 | 7948042 | 2.3462346  | -3.4183 | 0.686109 | 0.0299591 |
| 2331 | 7895551 | -2.3458342 | -3.4189 | -0.40404 | 0.0299838 |
| 2332 | 7892740 | 2.3431072  | -3.4228 | 1.94812  | 0.030153  |
| 2333 | 7894212 | 2.3426053  | -3.4236 | 0.588931 | 0.0301843 |
| 2334 | 7896181 | 2.3421667  | -3.4242 | 0.888727 | 0.0302116 |

|      |         |            |         |          |           |
|------|---------|------------|---------|----------|-----------|
| 2335 | 8123763 | 2.341685   | -3.4249 | 0.530692 | 0.0302416 |
| 2336 | 7895983 | -2.3408339 | -3.4261 | -3.08068 | 0.0302948 |
| 2337 | 7892959 | 2.3406802  | -3.4263 | 0.450697 | 0.0303044 |
| 2338 | 7895914 | 2.3377053  | -3.4307 | 1.268048 | 0.0304908 |
| 2339 | 7894096 | -2.3375363 | -3.4309 | -0.65025 | 0.0305014 |
| 2340 | 8105645 | -2.3350922 | -3.4345 | -4.97901 | 0.0306554 |
| 2341 | 8044743 | 2.330395   | -3.4413 | 1.361758 | 0.0309535 |
| 2342 | 8081818 | 2.329442   | -3.4426 | 0.483353 | 0.0310143 |
| 2343 | 8035859 | 2.3289061  | -3.4434 | 0.549144 | 0.0310485 |
| 2344 | 7917180 | -2.3274202 | -3.4456 | -1.39739 | 0.0311436 |
| 2345 | 7918755 | 2.324981   | -3.4491 | 0.726633 | 0.0313003 |
| 2346 | 8111627 | -2.3237361 | -3.4509 | -0.67521 | 0.0313806 |
| 2347 | 8127656 | -2.3227452 | -3.4523 | -3.72561 | 0.0314446 |
| 2348 | 7892983 | -2.3226828 | -3.4524 | -0.37202 | 0.0314486 |
| 2349 | 7894113 | -2.3219906 | -3.4534 | -4.08207 | 0.0314934 |
| 2350 | 7895810 | 2.3216807  | -3.4539 | 0.627437 | 0.0315135 |
| 2351 | 8097305 | 2.3208591  | -3.4551 | 1.01164  | 0.0315668 |
| 2352 | 8165860 | -2.3189344 | -3.4578 | -0.60931 | 0.0316919 |
| 2353 | 7895308 | 2.3155402  | -3.4627 | 0.498694 | 0.0319138 |
| 2354 | 7893313 | -2.3147071 | -3.4639 | -0.49628 | 0.0319684 |
| 2355 | 7895199 | 2.3132733  | -3.466  | 4.152251 | 0.0320627 |
| 2356 | 7895691 | 2.3128664  | -3.4666 | 0.708266 | 0.0320895 |
| 2357 | 8021824 | 2.3115259  | -3.4685 | 0.910749 | 0.032178  |
| 2358 | 7895085 | 2.3106829  | -3.4698 | 0.786913 | 0.0322337 |
| 2359 | 7895122 | -2.3081069 | -3.4735 | -0.37813 | 0.0324046 |
| 2360 | 8135271 | -2.3077933 | -3.4739 | -0.67303 | 0.0324254 |
| 2361 | 7914498 | -2.3062922 | -3.4761 | -0.53687 | 0.0325254 |
| 2362 | 8049197 | -2.3058052 | -3.4768 | -1.51789 | 0.032558  |
| 2363 | 7966425 | -2.3025065 | -3.4815 | -0.45463 | 0.0327789 |
| 2364 | 8020971 | -2.3019303 | -3.4824 | -0.47785 | 0.0328177 |
| 2365 | 7986627 | -2.3016798 | -3.4827 | -4.84962 | 0.0328346 |
| 2366 | 8053718 | 2.301123   | -3.4835 | 5.789918 | 0.0328721 |
| 2367 | 7892772 | -2.2995518 | -3.4858 | -0.91433 | 0.0329781 |
| 2368 | 7895093 | 2.2960591  | -3.4908 | 0.977975 | 0.0332149 |
| 2369 | 8169156 | -2.2958174 | -3.4912 | -0.54711 | 0.0332314 |
| 2370 | 7895008 | -2.2950872 | -3.4922 | -1.25342 | 0.0332811 |
| 2371 | 7917050 | -2.294397  | -3.4932 | -0.78443 | 0.0333282 |
| 2372 | 8021368 | 2.2930641  | -3.4951 | 0.694815 | 0.0334192 |
| 2373 | 7930629 | -2.2914017 | -3.4975 | -3.1357  | 0.0335332 |
| 2374 | 7893984 | -2.2905185 | -3.4988 | -3.24955 | 0.0335938 |
| 2375 | 7981317 | 2.2899405  | -3.4996 | 0.399395 | 0.0336336 |
| 2376 | 8043022 | 2.2892006  | -3.5007 | 0.956442 | 0.0336845 |
| 2377 | 7984255 | -2.2887387 | -3.5013 | -5.08298 | 0.0337164 |
| 2378 | 8045275 | -2.2879924 | -3.5024 | -1.4744  | 0.0337679 |
| 2379 | 7895574 | -2.2874808 | -3.5032 | -0.46347 | 0.0338033 |
| 2380 | 7895823 | -2.2852193 | -3.5064 | -3.91493 | 0.03396   |
| 2381 | 7895532 | -2.2843275 | -3.5077 | -0.74771 | 0.0340219 |
| 2382 | 8156261 | 2.2834032  | -3.509  | 4.960782 | 0.0340863 |
| 2383 | 8128258 | 2.2833469  | -3.5091 | 0.426908 | 0.0340902 |
| 2384 | 7983938 | -2.2820908 | -3.5109 | -0.66678 | 0.0341778 |
| 2385 | 7947421 | -2.2800036 | -3.5139 | -0.72577 | 0.0343239 |
| 2386 | 8145622 | 2.2798622  | -3.5141 | 0.571398 | 0.0343338 |
| 2387 | 8101061 | -2.2791115 | -3.5152 | -0.45727 | 0.0343865 |
| 2388 | 8079149 | 2.2789086  | -3.5155 | 0.514483 | 0.0344008 |
| 2389 | 7894013 | -2.276149  | -3.5194 | -0.85532 | 0.0345952 |
| 2390 | 7928514 | -2.2759936 | -3.5196 | -0.50108 | 0.0346062 |
| 2391 | 7894167 | -2.2758517 | -3.5198 | -0.85416 | 0.0346162 |
| 2392 | 8151445 | -2.2756643 | -3.5201 | -3.63932 | 0.0346294 |
| 2393 | 8117565 | 2.2753659  | -3.5205 | 0.535062 | 0.0346506 |
| 2394 | 7894010 | -2.2746989 | -3.5215 | -3.16918 | 0.0346978 |
| 2395 | 8043441 | 2.27326    | -3.5235 | 1.82997  | 0.0347998 |
| 2396 | 8055305 | 2.2708242  | -3.527  | 0.65083  | 0.0349732 |
| 2397 | 7896066 | -2.2705814 | -3.5274 | -3.45928 | 0.0349905 |
| 2398 | 7896505 | -2.2694789 | -3.529  | -3.62133 | 0.0350693 |
| 2399 | 8091444 | 2.2683438  | -3.5306 | 0.505951 | 0.0351506 |
| 2400 | 8034905 | -2.2679079 | -3.5312 | -0.56762 | 0.0351819 |
| 2401 | 8050906 | -2.2663497 | -3.5334 | -0.58566 | 0.0352938 |
| 2402 | 8116992 | 2.2638009  | -3.5371 | 1.159428 | 0.0354776 |
| 2403 | 7906993 | 2.2622793  | -3.5392 | 0.376981 | 0.0355878 |
| 2404 | 8043572 | -2.2621379 | -3.5395 | -0.39345 | 0.035598  |
| 2405 | 8096457 | 2.2605899  | -3.5417 | 0.492975 | 0.0357105 |
| 2406 | 7894471 | -2.2601844 | -3.5422 | -0.44885 | 0.03574   |
| 2407 | 8102592 | -2.2560911 | -3.5481 | -0.7675  | 0.036039  |

|      |         |            |         |          |           |
|------|---------|------------|---------|----------|-----------|
| 2408 | 7895534 | -2.2548394 | -3.5499 | -0.84135 | 0.036131  |
| 2409 | 7910674 | 2.2522375  | -3.5536 | 5.19529  | 0.0363227 |
| 2410 | 7934840 | 2.2475891  | -3.5602 | 0.663485 | 0.0366676 |
| 2411 | 7953979 | 2.2474624  | -3.5604 | 1.554469 | 0.0366771 |
| 2412 | 7893723 | -2.2466686 | -3.5615 | -0.96157 | 0.0367363 |
| 2413 | 8036989 | 2.2461833  | -3.5622 | 0.515365 | 0.0367725 |
| 2414 | 8168884 | -2.2450548 | -3.5638 | -2.79517 | 0.0368569 |
| 2415 | 7985200 | -2.2448571 | -3.5641 | -0.49633 | 0.0368718 |
| 2416 | 8145134 | 2.2433769  | -3.5662 | 0.91917  | 0.0369828 |
| 2417 | 8090637 | 2.2418356  | -3.5684 | 0.344663 | 0.0370987 |
| 2418 | 7896442 | -2.2418346 | -3.5684 | -0.65531 | 0.0370988 |
| 2419 | 7892675 | 2.241825   | -3.5684 | 0.903076 | 0.0370995 |
| 2420 | 8120269 | -2.241027  | -3.5695 | -0.68269 | 0.0371597 |
| 2421 | 7896696 | 2.2406784  | -3.57   | 0.418022 | 0.037186  |
| 2422 | 8113614 | -2.2395692 | -3.5716 | -0.59253 | 0.0372698 |
| 2423 | 8136291 | 2.2388126  | -3.5727 | 5.493066 | 0.0373271 |
| 2424 | 8055592 | 2.2374737  | -3.5746 | 0.540014 | 0.0374286 |
| 2425 | 7893779 | -2.2372007 | -3.575  | -0.34077 | 0.0374494 |
| 2426 | 8000882 | 2.2368144  | -3.5755 | 0.491455 | 0.0374787 |
| 2427 | 7945950 | -2.2367975 | -3.5756 | -1.28436 | 0.03748   |
| 2428 | 7899375 | -2.2365805 | -3.5759 | -2.68711 | 0.0374965 |
| 2429 | 7893724 | -2.2360003 | -3.5767 | -0.78201 | 0.0375407 |
| 2430 | 7893487 | -2.2356533 | -3.5772 | -0.79837 | 0.0375671 |
| 2431 | 8083939 | 2.2344476  | -3.5789 | 4.269085 | 0.0376591 |
| 2432 | 8134403 | -2.2335076 | -3.5802 | -3.15343 | 0.037731  |
| 2433 | 8122240 | -2.2328705 | -3.5811 | -4.73517 | 0.0377797 |
| 2434 | 7961887 | 2.2323254  | -3.5819 | 0.355948 | 0.0378215 |
| 2435 | 8020025 | -2.2271826 | -3.5892 | -0.6166  | 0.0382177 |
| 2436 | 8124194 | 2.2266848  | -3.5899 | 0.665653 | 0.0382563 |
| 2437 | 7930915 | 2.2248508  | -3.5925 | 0.665037 | 0.0383986 |
| 2438 | 8180220 | -2.2238545 | -3.5939 | -0.95362 | 0.0384762 |
| 2439 | 8084122 | 2.2212269  | -3.5976 | 0.586277 | 0.0386813 |
| 2440 | 7955074 | -2.2211234 | -3.5978 | -4.71944 | 0.0386894 |
| 2441 | 8092199 | -2.2198782 | -3.5995 | -1.51494 | 0.038787  |
| 2442 | 7925246 | -2.2196244 | -3.5999 | -3.24867 | 0.038807  |
| 2443 | 8152211 | -2.2186075 | -3.6013 | -0.71982 | 0.0388869 |
| 2444 | 8083592 | -2.2172147 | -3.6033 | -2.81591 | 0.0389966 |
| 2445 | 7896694 | 2.2151043  | -3.6063 | 1.050642 | 0.0391633 |
| 2446 | 8052056 | -2.214365  | -3.6073 | -2.94923 | 0.0392219 |
| 2447 | 8176415 | -2.2141966 | -3.6076 | -0.60775 | 0.0392352 |
| 2448 | 8145529 | 2.2139468  | -3.6079 | 0.580784 | 0.039255  |
| 2449 | 7894945 | 2.2127638  | -3.6096 | 0.510405 | 0.039349  |
| 2450 | 8105189 | -2.2114868 | -3.6114 | -0.60182 | 0.0394507 |
| 2451 | 7896701 | 2.2109243  | -3.6122 | 1.225044 | 0.0394955 |
| 2452 | 8095037 | -2.2079096 | -3.6165 | -3.70838 | 0.0397367 |
| 2453 | 8113443 | 2.2077076  | -3.6168 | 0.470324 | 0.0397529 |
| 2454 | 7968732 | -2.2076649 | -3.6168 | -0.48248 | 0.0397563 |
| 2455 | 7895589 | 2.2076086  | -3.6169 | 0.438721 | 0.0397609 |
| 2456 | 7988685 | 2.2072295  | -3.6174 | 0.448312 | 0.0397913 |
| 2457 | 7893647 | -2.2064146 | -3.6186 | -0.348   | 0.0398568 |
| 2458 | 8085052 | -2.203575  | -3.6226 | -0.80637 | 0.0400859 |
| 2459 | 7895159 | -2.2015788 | -3.6254 | -2.91225 | 0.0402476 |
| 2460 | 8112174 | -2.2012898 | -3.6258 | -0.40488 | 0.0402711 |
| 2461 | 8161568 | 2.200515   | -3.6269 | 1.692231 | 0.040334  |
| 2462 | 8148329 | 2.1993798  | -3.6285 | 0.425721 | 0.0404265 |
| 2463 | 7896490 | -2.1979863 | -3.6305 | -0.36563 | 0.0405402 |
| 2464 | 7895322 | -2.1975695 | -3.6311 | -0.4725  | 0.0405743 |
| 2465 | 7893608 | -2.1970344 | -3.6318 | -0.5064  | 0.040618  |
| 2466 | 7910672 | 2.1947844  | -3.635  | 4.805167 | 0.0408026 |
| 2467 | 7894304 | 2.1945463  | -3.6353 | 0.474214 | 0.0408222 |
| 2468 | 7892733 | -2.1941216 | -3.6359 | -0.99922 | 0.0408571 |
| 2469 | 8009513 | -2.1932225 | -3.6372 | -0.46302 | 0.0409312 |
| 2470 | 8170418 | -2.1932067 | -3.6372 | -0.43731 | 0.0409325 |
| 2471 | 7962242 | -2.1923311 | -3.6384 | -0.66421 | 0.0410047 |
| 2472 | 7896106 | -2.191359  | -3.6398 | -1.74134 | 0.0410851 |
| 2473 | 8111212 | 2.1900591  | -3.6416 | 0.669256 | 0.0411927 |
| 2474 | 8161580 | 2.1898031  | -3.642  | 1.684257 | 0.0412139 |
| 2475 | 7896109 | -2.1893841 | -3.6426 | -4.75762 | 0.0412487 |
| 2476 | 7971913 | -2.1877048 | -3.6449 | -4.35931 | 0.0413883 |
| 2477 | 7894436 | -2.1872183 | -3.6456 | -0.68121 | 0.0414289 |
| 2478 | 8003857 | -2.1866436 | -3.6464 | -0.74511 | 0.0414768 |
| 2479 | 7894762 | -2.1862101 | -3.647  | -0.71974 | 0.041513  |
| 2480 | 7893173 | -2.1854202 | -3.6481 | -0.34643 | 0.041579  |

|      |         |            |         |          |           |
|------|---------|------------|---------|----------|-----------|
| 2481 | 8106767 | -2.1828632 | -3.6517 | -0.95381 | 0.0417933 |
| 2482 | 7895636 | 2.1819128  | -3.6531 | 5.513379 | 0.0418733 |
| 2483 | 7918757 | -2.181028  | -3.6543 | -0.6958  | 0.0419478 |
| 2484 | 7938299 | -2.1797754 | -3.6561 | -3.07176 | 0.0420535 |
| 2485 | 7895949 | 2.178012   | -3.6585 | 0.68198  | 0.0422028 |
| 2486 | 7895491 | -2.177264  | -3.6596 | -0.89576 | 0.0422662 |
| 2487 | 7895538 | 2.1770967  | -3.6598 | 0.691606 | 0.0422804 |
| 2488 | 7894402 | -2.1755718 | -3.662  | -0.3367  | 0.0424101 |
| 2489 | 7895861 | -2.1750956 | -3.6626 | -4.2987  | 0.0424507 |
| 2490 | 7911349 | -2.1746469 | -3.6633 | -0.78974 | 0.0424889 |
| 2491 | 8168998 | -2.1742613 | -3.6638 | -0.51794 | 0.0425218 |
| 2492 | 7934095 | -2.1722097 | -3.6667 | -1.58546 | 0.0426973 |
| 2493 | 7893468 | -2.1713765 | -3.6678 | -1.23782 | 0.0427687 |
| 2494 | 7892679 | -2.1703919 | -3.6692 | -1.09736 | 0.0428533 |
| 2495 | 7895280 | 2.1692334  | -3.6708 | 0.376846 | 0.042953  |
| 2496 | 7895381 | -2.1671418 | -3.6738 | -1.01681 | 0.0431335 |
| 2497 | 8142017 | 2.1670679  | -3.6739 | 0.414667 | 0.0431399 |
| 2498 | 7893716 | -2.1652998 | -3.6763 | -1.71338 | 0.0432931 |
| 2499 | 7896101 | -2.1629137 | -3.6797 | -0.4267  | 0.0435005 |
| 2500 | 7893293 | 2.1614207  | -3.6818 | 4.399878 | 0.0436308 |
| 2501 | 7895048 | 2.1603914  | -3.6832 | 0.780093 | 0.0437209 |
| 2502 | 8167784 | 2.1592564  | -3.6848 | 0.733056 | 0.0438203 |
| 2503 | 8129039 | -2.1564685 | -3.6887 | -1.44993 | 0.0440656 |
| 2504 | 8019937 | 2.1539794  | -3.6921 | 0.362394 | 0.0442855 |
| 2505 | 8009524 | 2.1529135  | -3.6936 | 0.670128 | 0.0443801 |
| 2506 | 7893125 | 2.1525382  | -3.6942 | 0.571335 | 0.0444134 |
| 2507 | 7893754 | -2.1518117 | -3.6952 | -0.86063 | 0.0444779 |
| 2508 | 7927031 | -2.1517948 | -3.6952 | -2.34442 | 0.0444794 |
| 2509 | 7906465 | 2.1512392  | -3.696  | 0.624527 | 0.0445289 |
| 2510 | 8058195 | -2.1506236 | -3.6968 | -5.21381 | 0.0445837 |
| 2511 | 8070900 | 2.1505719  | -3.6969 | 0.452995 | 0.0445883 |
| 2512 | 8067981 | -2.149835  | -3.6979 | -3.01433 | 0.0446541 |
| 2513 | 7892704 | -2.1489985 | -3.6991 | -0.35882 | 0.0447288 |
| 2514 | 8168676 | -2.148522  | -3.6997 | -0.47601 | 0.0447714 |
| 2515 | 8147371 | -2.14835   | -3.7    | -2.52334 | 0.0447868 |
| 2516 | 7895129 | -2.1470082 | -3.7019 | -2.99415 | 0.044907  |
| 2517 | 7896528 | -2.1459455 | -3.7033 | -0.38404 | 0.0450024 |
| 2518 | 7960514 | -2.1457867 | -3.7036 | -3.77485 | 0.0450167 |
| 2519 | 7894907 | -2.1440799 | -3.7059 | -0.58337 | 0.0451704 |
| 2520 | 7893481 | -2.1439532 | -3.7061 | -2.14565 | 0.0451818 |
| 2521 | 7894617 | -2.1425541 | -3.708  | -0.57007 | 0.0453082 |
| 2522 | 7950893 | -2.1424799 | -3.7082 | -2.2641  | 0.0453149 |
| 2523 | 8003846 | 2.1419235  | -3.7089 | 0.388715 | 0.0453653 |
| 2524 | 8052932 | 2.1414415  | -3.7096 | 0.803746 | 0.0454089 |
| 2525 | 8130183 | 2.139566   | -3.7122 | 0.747932 | 0.0455792 |
| 2526 | 7970804 | -2.1390509 | -3.7129 | -0.48719 | 0.0456261 |
| 2527 | 8048761 | -2.1376705 | -3.7148 | -0.77797 | 0.0457519 |
| 2528 | 8047559 | 2.1376386  | -3.7149 | 4.656047 | 0.0457548 |
| 2529 | 8107671 | 2.1373384  | -3.7153 | 0.620523 | 0.0457822 |
| 2530 | 7895508 | 2.135246   | -3.7182 | 0.457029 | 0.0459736 |
| 2531 | 8066027 | 2.1335171  | -3.7206 | 4.774872 | 0.0461323 |
| 2532 | 7901374 | -2.1334894 | -3.7206 | -2.93291 | 0.0461348 |
| 2533 | 8101990 | -2.1327374 | -3.7217 | -0.70031 | 0.046204  |
| 2534 | 7975309 | 2.1300885  | -3.7254 | 0.98262  | 0.0464485 |
| 2535 | 8130403 | 2.1289962  | -3.7269 | 0.293649 | 0.0465496 |
| 2536 | 8150149 | -2.1282179 | -3.7279 | -0.47998 | 0.0466218 |
| 2537 | 8085912 | -2.1274583 | -3.729  | -4.12686 | 0.0466924 |
| 2538 | 7903113 | -2.1268058 | -3.7299 | -2.75322 | 0.0467531 |
| 2539 | 7952223 | -2.1268025 | -3.7299 | -0.5976  | 0.0467534 |
| 2540 | 8093974 | -2.1243928 | -3.7332 | -0.61616 | 0.0469781 |
| 2541 | 7896094 | 2.1228971  | -3.7353 | 0.487903 | 0.0471181 |
| 2542 | 8124924 | -2.1228093 | -3.7354 | -0.37905 | 0.0471263 |
| 2543 | 7893067 | -2.1215718 | -3.7372 | -0.89762 | 0.0472424 |
| 2544 | 7896664 | -2.1189394 | -3.7408 | -0.38068 | 0.0474903 |
| 2545 | 8055909 | -2.1186456 | -3.7412 | -0.99124 | 0.0475181 |
| 2546 | 7893513 | -2.1183446 | -3.7416 | -0.31547 | 0.0475465 |
| 2547 | 7896714 | 2.1158988  | -3.745  | 1.503515 | 0.0477781 |
| 2548 | 8134550 | -2.1149868 | -3.7463 | -0.53064 | 0.0478648 |
| 2549 | 8131512 | 2.1143112  | -3.7472 | 0.975397 | 0.047929  |
| 2550 | 7898373 | -2.1141375 | -3.7474 | -1.00922 | 0.0479456 |
| 2551 | 8055641 | 2.1133026  | -3.7486 | 0.665714 | 0.0480251 |
| 2552 | 7900633 | -2.1107795 | -3.7521 | -4.43797 | 0.0482663 |
| 2553 | 7894591 | -2.1079934 | -3.7559 | -2.43576 | 0.0485338 |

|      |         |            |         |          |           |
|------|---------|------------|---------|----------|-----------|
| 2554 | 7910096 | 2.1078508  | -3.7561 | 0.580823 | 0.0485475 |
| 2555 | 8171489 | -2.1075671 | -3.7565 | -3.79915 | 0.0485749 |
| 2556 | 7950532 | -2.106334  | -3.7582 | -3.89534 | 0.0486938 |
| 2557 | 7895962 | -2.1052674 | -3.7597 | -1.0455  | 0.0487969 |
| 2558 | 7896187 | -2.1044285 | -3.7608 | -4.70373 | 0.0488781 |
| 2559 | 8067197 | 2.1041601  | -3.7612 | 0.533039 | 0.0489041 |
| 2560 | 7981773 | 2.1030251  | -3.7627 | 0.597636 | 0.0490143 |
| 2561 | 7939998 | 2.102735   | -3.7631 | 0.382322 | 0.0490424 |
| 2562 | 7899071 | 2.1027252  | -3.7632 | 0.796351 | 0.0490434 |
| 2563 | 7893030 | 2.1024467  | -3.7635 | 0.796873 | 0.0490705 |
| 2564 | 7894742 | 2.1018573  | -3.7644 | 0.701968 | 0.0491278 |
| 2565 | 7895976 | -2.1003483 | -3.7664 | -0.59611 | 0.0492749 |
| 2566 | 7895341 | -2.1000538 | -3.7668 | -3.76815 | 0.0493036 |
| 2567 | 7949954 | -2.1000249 | -3.7669 | -2.03301 | 0.0493065 |
| 2568 | 7895464 | -2.0998666 | -3.7671 | -0.56906 | 0.0493219 |
| 2569 | 8154719 | -2.09876   | -3.7686 | -1.98998 | 0.0494301 |
| 2570 | 7896468 | -2.0984803 | -3.769  | -0.40313 | 0.0494575 |
| 2571 | 8111214 | 2.0981067  | -3.7695 | 0.417777 | 0.0494941 |
| 2572 | 7895424 | -2.0971538 | -3.7708 | -0.92762 | 0.0495876 |
| 2573 | 8133854 | 2.0971222  | -3.7709 | 5.204177 | 0.0495907 |
| 2574 | 8022745 | 2.0960733  | -3.7723 | 0.398289 | 0.0496938 |
| 2575 | 7973869 | 2.0958311  | -3.7726 | 1.701581 | 0.0497176 |

**Supplementary Table 2.** Differentially expressed gene list of TNBC cell lines (BT549, HS578T, and MDA-MB-231) versus non-TNBC cell lines (MCF7 and T47D).

| #  | ID           | Gene.symbol | TNBC group (tested) | non-TNBC group (base line) | logFC      | P.Value  | Gene.title                                                          |
|----|--------------|-------------|---------------------|----------------------------|------------|----------|---------------------------------------------------------------------|
| 1  | 209459_s_at  | ABAT        | 26.491167           | 36.54245                   | -5.884911  | 5.55E-16 | 4-aminobutyrate aminotransferase                                    |
| 2  | 209460_at    | ABAT        | 21.396832           | 24.901831                  | -4.7562425 | 1.53E-13 | 4-aminobutyrate aminotransferase                                    |
| 3  | 206527_at    | ABAT        | 12.272142           | 13.086629                  | -1.2167816 | 1.45E-09 | 4-aminobutyrate aminotransferase                                    |
| 4  | 215465_at    | ABCA12      | 33.241545           | 68.979819                  | -5.4222065 | 4.60E-20 | ATP binding cassette subfamily A member 12                          |
| 5  | 230913_at    | ABCG1       | 10.512109           | 11.54248                   | -2.3117885 | 8.01E-09 | ATP binding cassette subfamily G member 1                           |
| 6  | 208636_at    | ACTN1       | 11.197986           | -12.124168                 | 1.9801712  | 4.12E-09 | actinin alpha 1                                                     |
| 7  | 213102_at    | ACTR3       | 13.795153           | -14.570094                 | 1.5931459  | 3.27E-10 | ARP3 actin related protein 3 homolog                                |
| 8  | 209765_at    | ADAM19      | 10.706551           | -11.704903                 | 1.8636232  | 6.63E-09 | ADAM metalloproteinase domain 19                                    |
| 9  | 237411_at    | ADAMTS6     | 15.344434           | -16.241309                 | 4.4511655  | 7.10E-11 | ADAM metalloproteinase with thrombospondin type 1 motif 6           |
| 10 | 209195_s_at  | ADCY6       | 14.359695           | 15.1589                    | -1.5336519 | 1.88E-10 | adenylate cyclase 6                                                 |
| 11 | 223582_at    | ADGRV1      | 14.164987           | 14.953307                  | -1.8078524 | 2.27E-10 | adhesion G protein-coupled receptor V1                              |
| 12 | 205891_at    | ADORA2B     | 15.25965            | -16.145219                 | 5.0939892  | 7.72E-11 | adenosine A2b receptor                                              |
| 13 | 225114_at    | AGPS        | 11.110436           | -12.04854                  | 4.7619854  | 4.48E-09 | alkylglycerone phosphate synthase                                   |
| 14 | 225108_at    | AGPS        | 11.065719           | -12.010071                 | 3.0934464  | 4.68E-09 | alkylglycerone phosphate synthase                                   |
| 15 | 202820_at    | AHR         | 11.654044           | -12.524866                 | 2.9984632  | 2.64E-09 | aryl hydrocarbon receptor                                           |
| 16 | 1553734_at   | AK7         | 12.595471           | 13.389421                  | -3.954627  | 1.06E-09 | adenylate kinase 7                                                  |
| 17 | 201272_at    | AKR1B1      | 18.830324           | -20.739883                 | 5.2674114  | 2.16E-12 | aldo-keto reductase family 1 member B                               |
| 18 | 212607_at    | AKT3        | 15.720464           | -16.674346                 | 4.1472436  | 4.89E-11 | AKT serine/threonine kinase 3                                       |
| 19 | 222880_at    | AKT3        | 15.627991           | -16.566802                 | 3.6666826  | 5.36E-11 | AKT serine/threonine kinase 3                                       |
| 20 | 212609_s_at  | AKT3        | 15.499833           | -16.418897                 | 3.7377981  | 6.09E-11 | AKT serine/threonine kinase 3                                       |
| 21 | 209645_s_at  | ALDH1B1     | 12.350287           | -13.159236                 | 1.820933   | 1.34E-09 | aldehyde dehydrogenase 1 family member B1                           |
| 22 | 206385_s_at  | ANK3        | 19.162678           | 21.232536                  | -4.8054182 | 1.54E-12 | ankyrin 3, node of Ranvier (ankyrin G)                              |
| 23 | 228573_at    | ANTXR2      | 13.562188           | -14.333493                 | 3.4331134  | 4.10E-10 | anthrax toxin receptor 2                                            |
| 24 | 225524_at    | ANTXR2      | 13.083643           | -13.85872                  | 4.5503851  | 6.56E-10 | anthrax toxin receptor 2                                            |
| 25 | 201012_at    | ANXA1       | 16.515151           | -17.627897                 | 7.062545   | 2.22E-11 | annexin A1                                                          |
| 26 | 202791_at    | ANXA5       | 17.687904           | -19.137927                 | 1.2185257  | 6.86E-12 | annexin A5                                                          |
| 27 | 211712_s_at  | ANXA9       | 12.397109           | 13.202914                  | -4.5001464 | 1.28E-09 | annexin A9                                                          |
| 28 | 210085_s_at  | ANXA9       | 11.413583           | 12.312172                  | -3.7942773 | 3.34E-09 | annexin A9                                                          |
| 29 | 211975_at    | ARFGAP2     | 14.85046            | 12.375049                  | -1.0737957 | 3.11E-09 | ADP ribosylation factor GTPase activating protein 2                 |
| 30 | 224764_at    | ARHGAP21    | 13.530426           | -14.301517                 | 1.3353342  | 4.23E-10 | Rho GTPase activating protein 21                                    |
| 31 | 201230_s_at  | ARIH2       | 10.754214           | -11.745013                 | 1.1312537  | 6.33E-09 | ariadne RBR E3 ubiquitin protein ligase 2                           |
| 32 | 202206_at    | ARL4C       | 20.424018           | -23.22285                  | 4.4963926  | 4.21E-13 | ADP ribosylation factor like GTPase 4C                              |
| 33 | 202207_at    | ARL4C       | 18.865281           | -20.791112                 | 5.8262263  | 2.09E-12 | ADP ribosylation factor like GTPase 4C                              |
| 34 | 202208_s_at  | ARL4C       | 12.521636           | -13.319721                 | 2.4879536  | 1.13E-09 | ADP ribosylation factor like GTPase 4C                              |
| 35 | 223696_at    | ARSD        | 10.30455            | 11.371213                  | -2.325981  | 9.79E-09 | arylsulfatase D                                                     |
| 36 | 224791_at    | ASAP1       | 18.384832           | -20.098802                 | 2.0686903  | 3.40E-12 | ArfGAP with SH3 domain, ankyrin repeat and PH domain 1              |
| 37 | 224790_at    | ASAP1       | 16.9528             | -18.176482                 | 1.8610886  | 1.43E-11 | ArfGAP with SH3 domain, ankyrin repeat and PH domain 1              |
| 38 | 221039_s_at  | ASAP1       | 16.817511           | -18.005056                 | 2.0375673  | 1.64E-11 | ArfGAP with SH3 domain, ankyrin repeat and PH domain 1              |
| 39 | 224796_at    | ASAP1       | 16.606185           | -17.740594                 | 1.7908866  | 2.03E-11 | ArfGAP with SH3 domain, ankyrin repeat and PH domain 1              |
| 40 | 236533_at    | ASAP1       | 12.774759           | -13.560056                 | 1.1918423  | 8.86E-10 | ArfGAP with SH3 domain, ankyrin repeat and PH domain 1              |
| 41 | 206043_s_at  | ATP2C2      | 16.636482           | 17.778265                  | -2.6814482 | 1.97E-11 | ATPase secretory pathway Ca2+ transporting 2                        |
| 42 | 208764_s_at  | ATP5G2      | 12.809907           | 13.59374                   | -1.4835335 | 8.57E-10 | ATP synthase, H+ transporting, mitochondrial Fo complex subunit C2  |
| 43 | 213106_at    | ATP8A1      | 22.628834           | 27.235009                  | -3.1253898 | 4.14E-14 | ATPase phospholipid transporting 8A1                                |
| 44 | 212114_at    | ATXN7L3B    | 25.508767           | 33.825817                  | -2.0874528 | 1.73E-15 | ataxin 7 like 3B                                                    |
| 45 | 202686_s_at  | AXL         | 18.420764           | -20.149714                 | 7.2430362  | 3.28E-12 | AXL receptor tyrosine kinase                                        |
| 46 | 225612_s_at  | B3GNT5      | 15.421208           | -16.328807                 | 5.1154156  | 6.58E-11 | UDP-GlcNAc:betaGal beta-1,3-N-acetylglucosaminyltransferase 5       |
| 47 | 209406_at    | BAG2        | 25.738842           | -34.437008                 | 3.8336023  | 1.33E-15 | BCL2 associated athanogene 2                                        |
| 48 | 230750_at    | BAG2        | 14.107968           | -14.893606                 | 1.450601   | 2.40E-10 | BCL2 associated athanogene 2                                        |
| 49 | 225285_at    | BCAT1       | 31.078706           | -54.613934                 | 5.7658465  | 1.46E-18 | branched chain amino acid transaminase 1                            |
| 50 | 226517_at    | BCAT1       | 26.816285           | -37.506988                 | 5.5100258  | 3.78E-16 | branched chain amino acid transaminase 1                            |
| 51 | 214452_at    | BCAT1       | 24.474937           | -31.248616                 | 4.1102373  | 5.53E-15 | branched chain amino acid transaminase 1                            |
| 52 | 214390_s_at  | BCAT1       | 18.449979           | -20.191208                 | 2.2245001  | 3.18E-12 | branched chain amino acid transaminase 1                            |
| 53 | 203795_s_at  | BCL7A       | 11.93382            | 12.776419                  | -1.2628278 | 2.01E-09 | BCL tumor suppressor 7A                                             |
| 54 | 239367_at    | BDNF        | 24.876821           | -32.219079                 | 2.8308213  | 3.53E-15 | brain derived neurotrophic factor                                   |
| 55 | 206382_s_at  | BDNF        | 21.584369           | -25.241352                 | 4.7480061  | 1.25E-13 | brain derived neurotrophic factor                                   |
| 56 | 213429_at    | BICC1       | 13.497093           | -14.26803                  | 5.2698264  | 4.37E-10 | BicC family RNA binding protein 1                                   |
| 57 | 231964_at    | BICD1       | 10.690896           | -11.691753                 | 1.5243192  | 6.73E-09 | BICD cargo adaptor 1                                                |
| 58 | 213154_s_at  | BICD2       | 11.632967           | -12.506095                 | 1.6644641  | 2.70E-09 | BICD cargo adaptor 2                                                |
| 59 | 228320_x_at  | BICDL1      | 17.732785           | 19.198319                  | -1.7355332 | 6.56E-12 | BICD family like cargo adaptor 1                                    |
| 60 | 235095_at    | BICDL2      | 11.749736           | 12.610406                  | -1.6292178 | 2.41E-09 | BICD family like cargo adaptor 2                                    |
| 61 | 202931_x_at  | BIN1        | 17.982543           | -19.538083                 | 3.2218109  | 5.10E-12 | bridging integrator 1                                               |
| 62 | 210201_x_at  | BIN1        | 15.666646           | -16.611673                 | 3.1704115  | 5.16E-11 | bridging integrator 1                                               |
| 63 | 214439_x_at  | BIN1        | 15.236272           | -16.118822                 | 3.328001   | 7.90E-11 | bridging integrator 1                                               |
| 64 | 210202_s_at  | BIN1        | 11.641355           | -12.513562                 | 2.0569617  | 2.67E-09 | bridging integrator 1                                               |
| 65 | 207655_s_at  | BLNK        | 10.363977           | 11.420028                  | -4.8057899 | 9.24E-09 | B-cell linker                                                       |
| 66 | 202701_at    | BMP1        | 10.39053            | -11.441897                 | 0.9654802  | 9.01E-09 | bone morphogenetic protein 1                                        |
| 67 | 218792_s_at  | BSPRY       | 26.064655           | 35.328077                  | -3.0439382 | 9.12E-16 | B-box and SPRY domain containing                                    |
| 68 | 222746_s_at  | BSPRY       | 19.796933           | 22.208613                  | -3.6349383 | 8.05E-13 | B-box and SPRY domain containing                                    |
| 69 | 205548_s_at  | BTG3        | 11.296738           | -12.209968                 | 4.5683173  | 3.74E-09 | BTG anti-proliferation factor 3                                     |
| 70 | 225863_s_at  | C19orf12    | 10.736503           | -11.730095                 | 1.2151227  | 6.44E-09 | chromosome 19 open reading frame 12                                 |
| 71 | 226107_at    | C1GALT1     | 13.048511           | -13.824447                 | 3.0500306  | 6.78E-10 | core 1 synthase, glycoprotein-N-acetylgalactosamine 3-beta-galactos |
| 72 | 226105_at    | C1GALT1     | 13.041183           | -13.817308                 | 3.0486652  | 6.83E-10 | core 1 synthase, glycoprotein-N-acetylgalactosamine 3-beta-galactos |
| 73 | 1554246_at   | C1orf210    | 12.738661           | 13.525541                  | -2.2201435 | 9.18E-10 | chromosome 1 open reading frame 210                                 |
| 74 | 223459_s_at  | C1orf56     | 12.377961           | 13.185036                  | -1.5608063 | 1.31E-09 | chromosome 1 open reading frame 56                                  |
| 75 | 1552575_a_at | C6orf141    | 16.078374           | 17.097202                  | -4.2776317 | 3.43E-11 | chromosome 6 open reading frame 141                                 |
| 76 | 229964_at    | C9orf152    | 15.794368           | 16.760795                  | -4.6862191 | 4.55E-11 | chromosome 9 open reading frame 152                                 |
| 77 | 1552755_at   | C9orf66     | 12.507609           | 13.306517                  | -1.0594082 | 1.15E-09 | chromosome 9 open reading frame 66                                  |
| 78 | 210108_at    | CACNA1D     | 19.136739           | 21.193631                  | -3.0364097 | 1.58E-12 | calcium voltage-gated channel subunit alpha1 D                      |
| 79 | 1555993_at   | CACNA1D     | 14.169259           | 14.957788                  | -1.6909512 | 2.26E-10 | calcium voltage-gated channel subunit alpha1 D                      |
| 80 | 228555_at    | CAMK2D      | 12.708931           | -13.497176                 | 3.3844655  | 9.45E-10 | calcium/calmodulin dependent protein kinase II delta                |
| 81 | 224994_at    | CAMK2D      | 10.741922           | -11.734657                 | 4.1223684  | 6.41E-09 | calcium/calmodulin dependent protein kinase II delta                |
| 82 | 1568617_a_at | CAMSAP3     | 17.046598           | 18.29632                   | -2.4319489 | 1.31E-11 | calmodulin regulated spectrin associated protein family member 3    |
| 83 | 213798_s_at  | CAP1        | 12.14873            | -12.972697                 | 1.8574658  | 1.63E-09 | adenylate cyclase associated protein 1                              |
| 84 | 200625_s_at  | CAP1        | 10.788489           | -11.773929                 | 1.8371226  | 6.12E-09 | adenylate cyclase associated protein 1                              |
| 85 | 210026_s_at  | CARD10      | 18.808502           | -20.707974                 | 3.0963261  | 2.21E-12 | caspase recruitment domain family member 10                         |

|     |              |                |           |            |            |          |                                                    |
|-----|--------------|----------------|-----------|------------|------------|----------|----------------------------------------------------|
| 86  | 203065_s_at  | CAV1           | 21.286671 | -24.704867 | 6.5879461  | 1.72E-13 | caveolin 1                                         |
| 87  | 212097_at    | CAV1           | 17.83691  | -19.339204 | 8.0735134  | 5.91E-12 | caveolin 1                                         |
| 88  | 203323_at    | CAV2           | 22.961448 | -27.909038 | 6.3897616  | 2.90E-14 | caveolin 2                                         |
| 89  | 203324_s_at  | CAV2           | 18.68998  | -20.535581 | 6.9012164  | 2.49E-12 | caveolin 2                                         |
| 90  | 208056_s_at  | CBFA2T3        | 19.82568  | 22.254012  | -3.2068468 | 7.81E-13 | CBFA2/RUNX1 translocation partner 3                |
| 91  | 220581_at    | CCDC170        | 20.444468 | 23.256791  | -3.8632652 | 4.13E-13 | coiled-coil domain containing 170                  |
| 92  | 226713_at    | CCDC50         | 10.581732 | -11.600416 | 1.9073104  | 7.48E-09 | coiled-coil domain containing 50                   |
| 93  | 223300_s_at  | CCDC82         | 10.585087 | -11.603214 | 2.4767784  | 7.46E-09 | coiled-coil domain containing 82                   |
| 94  | 225045_at    | CCDC88A        | 27.581466 | -39.922706 | 4.1844644  | 1.51E-16 | coiled-coil domain containing 88A                  |
| 95  | 221078_s_at  | CCDC88A        | 15.97534  | -16.974382 | 2.1997987  | 3.80E-11 | coiled-coil domain containing 88A                  |
| 96  | 231991_at    | CCM2L          | 11.045079 | 11.99235   | -0.8612029 | 4.77E-09 | CCM2 like scaffolding protein                      |
| 97  | 208796_s_at  | CCNG1          | 11.130852 | 12.06614   | -1.0375211 | 4.39E-09 | cyclin G1                                          |
| 98  | 212014_x_at  | CD44           | 17.040224 | -18.28815  | 3.2100945  | 1.31E-11 | CD44 molecule (Indian blood group)                 |
| 99  | 209835_x_at  | CD44           | 16.795687 | -17.977559 | 3.2816216  | 1.68E-11 | CD44 molecule (Indian blood group)                 |
| 100 | 204490_s_at  | CD44           | 16.462761 | -17.563371 | 3.2409946  | 2.34E-11 | CD44 molecule (Indian blood group)                 |
| 101 | 210916_s_at  | CD44           | 13.590928 | -14.362485 | 3.6411554  | 3.99E-10 | CD44 molecule (Indian blood group)                 |
| 102 | 1557905_s_at | CD44           | 10.886762 | -11.857175 | 3.6846567  | 5.57E-09 | CD44 molecule (Indian blood group)                 |
| 103 | 204489_s_at  | CD44           | 10.678198 | -11.681098 | 2.7948278  | 6.81E-09 | CD44 molecule (Indian blood group)                 |
| 104 | 225685_at    | CDC42EP3       | 11.642534 | -12.514612 | 5.7799705  | 2.67E-09 | CDC42 effector protein 3                           |
| 105 | 201130_s_at  | CDH1           | 29.41319  | 46.718388  | -5.7686483 | 1.48E-17 | cadherin 1                                         |
| 106 | 201131_s_at  | CDH1           | 24.629795 | 31.618053  | -7.6506876 | 4.66E-15 | cadherin 1                                         |
| 107 | 207173_x_at  | CDH11          | 10.725542 | -11.72087  | 6.1121225  | 6.51E-09 | cadherin 11                                        |
| 108 | 224848_at    | CDK6           | 21.931781 | -25.884708 | 4.1141521  | 8.70E-14 | cyclin dependent kinase 6                          |
| 109 | 224847_at    | CDK6           | 19.762378 | -22.154179 | 4.6370049  | 8.34E-13 | cyclin dependent kinase 6                          |
| 110 | 224851_at    | CDK6           | 17.421054 | -18.782936 | 5.0851133  | 8.98E-12 | cyclin dependent kinase 6                          |
| 111 | 235287_at    | CDK6           | 12.796223 | -13.580617 | 2.4799923  | 8.68E-10 | cyclin dependent kinase 6                          |
| 112 | 226185_at    | CDS1           | 24.652137 | 31.671814  | -4.7111715 | 4.54E-15 | CDP-diacylglycerol synthase 1                      |
| 113 | 205709_s_at  | CDS1           | 24.162985 | 30.520973  | -4.5897217 | 7.82E-15 | CDP-diacylglycerol synthase 1                      |
| 114 | 226187_at    | CDS1           | 18.611695 | 20.422563  | -2.3705753 | 2.70E-12 | CDP-diacylglycerol synthase 1                      |
| 115 | 41660_at     | CELSR1         | 14.202872 | 14.993099  | -2.8017601 | 2.19E-10 | cadherin EGF LAG seven-pass G-type receptor 1      |
| 116 | 228007_at    | CEP85L         | 13.569197 | -14.340558 | 1.4836103  | 4.08E-10 | centrosomal protein 85 like                        |
| 117 | 223232_s_at  | CGN            | 12.253313 | 13.069187  | -2.6178626 | 1.47E-09 | cingulin                                           |
| 118 | 228560_at    | CHDH           | 15.564884 | 16.493808  | -2.5924177 | 5.71E-11 | choline dehydrogenase                              |
| 119 | 209834_at    | CHST3          | 12.869341 | -13.650873 | 2.2519573  | 8.08E-10 | carbohydrate sulfotransferase 3                    |
| 120 | 225623_at    | CIPC           | 13.145805 | 13.919554  | -1.8139651 | 6.17E-10 | CLOCK interacting pacemaker                        |
| 121 | 200811_at    | CIRBP          | 11.906806 | 12.751936  | -1.7679389 | 2.07E-09 | cold inducible RNA binding protein                 |
| 122 | 200810_s_at  | CIRBP          | 10.727624 | 11.722622  | -1.786412  | 6.50E-09 | cold inducible RNA binding protein                 |
| 123 | 202712_s_at  | CKMT1A//CKMT1B | 18.654178 | 20.483811  | -5.0127582 | 2.59E-12 | creatine kinase, mitochondrial 1B                  |
| 124 | 203954_x_at  | CLDN3          | 20.857277 | 23.954085  | -3.5988961 | 2.69E-13 | claudin 3                                          |
| 125 | 203953_s_at  | CLDN3          | 18.12669  | 19.737063  | -5.8177835 | 4.41E-12 | claudin 3                                          |
| 126 | 224733_at    | CLTM3          | 20.339355 | -23.082931 | 2.9834898  | 4.60E-13 | CKLF like MARVEL transmembrane domain containing 3 |
| 127 | 1552344_s_at | CNOT7          | 11.269488 | -12.186239 | 1.5251406  | 3.84E-09 | CCR4-NOT transcription complex subunit 7           |
| 128 | 1553510_s_at | CNOT9          | 11.278038 | -12.19368  | 0.907366   | 3.81E-09 | CCR4-NOT transcription complex subunit 9           |
| 129 | 211964_at    | COL4A2         | 16.591989 | -17.722972 | 6.9736434  | 2.06E-11 | collagen type IV alpha 2 chain                     |
| 130 | 211966_at    | COL4A2         | 13.891913 | -14.669444 | 5.3048985  | 2.97E-10 | collagen type IV alpha 2 chain                     |
| 131 | 204724_s_at  | COL9A3         | 18.138173 | 19.753006  | -2.2265027 | 4.36E-12 | collagen type IX alpha 3 chain                     |
| 132 | 222644_s_at  | COLGALT1       | 11.891138 | -12.737755 | 2.525478   | 2.10E-09 | collagen beta(1-O)galactosyltransferase 1          |
| 133 | 218473_s_at  | COLGALT1       | 10.911328 | -11.878064 | 2.0786923  | 5.44E-09 | collagen beta(1-O)galactosyltransferase 1          |
| 134 | 223114_at    | COQ5           | 11.894566 | 12.740857  | -1.8708364 | 2.09E-09 | coenzyme Q5, methyltransferase                     |
| 135 | 222409_at    | CORO1C         | 11.265377 | -12.182663 | 2.0532098  | 3.85E-09 | coronin 1C                                         |
| 136 | 221059_s_at  | COTL1          | 10.435584 | -11.479084 | 3.0824534  | 8.62E-09 | coactosin like F-actin binding protein 1           |
| 137 | 225129_at    | CPNE2          | 10.567161 | -11.588271 | 2.0183392  | 7.59E-09 | copine 2                                           |
| 138 | 203633_at    | CPT1A          | 11.460981 | 12.353844  | -1.7678662 | 3.19E-09 | carnitine palmitoyltransferase 1A                  |
| 139 | 202575_at    | CRABP2         | 11.194085 | 12.12079   | -4.0281913 | 4.13E-09 | cellular retinoic acid binding protein 2           |
| 140 | 227429_at    | CRACR2B        | 16.067612 | 17.084332  | -1.8411259 | 3.47E-11 | calcium release activated channel regulator 2B     |
| 141 | 226455_at    | CREB3L4        | 28.074537 | 41.599231  | -4.6781436 | 8.20E-17 | cAMP responsive element binding protein 3 like 4   |
| 142 | 208774_at    | CSNK1D         | 13.495827 | 14.26676   | -0.9673608 | 4.38E-10 | casein kinase 1 delta                              |
| 143 | 214297_at    | CSPG4          | 12.592175 | -13.386303 | 1.191357   | 1.06E-09 | chondroitin sulfate proteoglycan 4                 |
| 144 | 209101_at    | CTGF           | 18.14063  | -19.756419 | 7.4492369  | 4.35E-12 | connective tissue growth factor                    |
| 145 | 225647_s_at  | CTSC           | 14.357297 | -15.156352 | 3.9769727  | 1.88E-10 | cathepsin C                                        |
| 146 | 225646_at    | CTSC           | 10.624576 | -11.636191 | 3.9392488  | 7.18E-09 | cathepsin C                                        |
| 147 | 203666_at    | CXCL12         | 14.229573 | 15.021205  | -4.0601656 | 2.13E-10 | C-X-C motif chemokine ligand 12                    |
| 148 | 209164_s_at  | CYB561         | 14.074115 | 14.858268  | -2.0829135 | 2.48E-10 | cytochrome b561                                    |
| 149 | 209163_at    | CYB561         | 11.465731 | 12.358026  | -2.4051558 | 3.17E-09 | cytochrome b561                                    |
| 150 | 210764_s_at  | CYR61          | 21.625751 | -25.316994 | 4.4969411  | 1.20E-13 | cysteine rich angiogenic inducer 61                |
| 151 | 201289_at    | CYR61          | 20.017372 | -22.559391 | 3.8490511  | 6.41E-13 | cysteine rich angiogenic inducer 61                |
| 152 | 216389_s_at  | DCAF11         | 12.208525 | 13.027786  | -0.8593834 | 1.54E-09 | DDB1 and CUL4 associated factor 11                 |
| 153 | 201886_at    | DCAF11         | 11.015532 | 11.967022  | -0.8217861 | 4.91E-09 | DDB1 and CUL4 associated factor 11                 |
| 154 | 222925_at    | DCDC2          | 16.632851 | 17.773745  | -2.424343  | 1.98E-11 | doublecortin domain containing 2                   |
| 155 | 212919_at    | DCP2           | 12.3205   | 13.131516  | -1.7353649 | 1.38E-09 | decapping mRNA 2                                   |
| 156 | 217973_at    | DCXR           | 22.274471 | 26.538338  | -2.3628888 | 6.04E-14 | dicarbonyl and L-xylulose reductase                |
| 157 | 243711_at    | DDAH1          | 11.83478  | -12.686862 | 1.886993   | 2.22E-09 | dimethylarginine dimethylaminohydrolase 1          |
| 158 | 236496_at    | DEGS2          | 22.992366 | 27.972713  | -3.4480173 | 2.80E-14 | delta 4-desaturase, sphingolipid 2                 |
| 159 | 53991_at     | DENND2A        | 11.448406 | -12.342776 | 2.6504667  | 3.23E-09 | DENN domain containing 2A                          |
| 160 | 221081_s_at  | DENND2D        | 10.926555 | 11.891027  | -3.1137107 | 5.36E-09 | DENN domain containing 2D                          |
| 161 | 203693_s_at  | DFNA5          | 22.395597 | -26.774044 | 4.6556258  | 5.31E-14 | DFNA5, deafness associated tumor suppressor        |
| 162 | 205603_s_at  | DIAPH2         | 16.290914 | -17.353392 | 3.5231427  | 2.78E-11 | diaphanous related formin 2                        |
| 163 | 205726_at    | DIAPH2         | 10.384153 | -11.436642 | 3.3412617  | 9.06E-09 | diaphanous related formin 2                        |
| 164 | 225061_at    | DNAJA4         | 11.265646 | 12.182897  | -3.8336837 | 3.85E-09 | DnaJ heat shock protein family (Hsp40) member A4   |
| 165 | 1554334_a_at | DNAJA4         | 11.105751 | 12.044505  | -3.1516083 | 4.50E-09 | DnaJ heat shock protein family (Hsp40) member A4   |
| 166 | 240633_at    | DOK7           | 15.317074 | 16.210239  | -2.6342488 | 7.30E-11 | docking protein 7                                  |
| 167 | 204646_at    | DPYD           | 15.562632 | -16.491208 | 6.1932929  | 5.72E-11 | dihydropyrimidine dehydrogenase                    |
| 168 | 200762_at    | DPYSL2         | 14.650104 | -15.470604 | 4.6827553  | 1.41E-10 | dihydropyrimidinase like 2                         |
| 169 | 204751_x_at  | DSC2           | 13.326654 | 14.097953  | -2.8239099 | 5.17E-10 | desmocollin 2                                      |
| 170 | 1562821_a_at | DSCAM-AS1      | 36.083034 | 105.178467 | -9.4892957 | 8.74E-23 | DSCAM antisense RNA 1                              |
| 171 | 218854_at    | DSE            | 13.897359 | -14.675054 | 4.6453686  | 2.95E-10 | dermatan sulfate epimerase                         |
| 172 | 238467_at    | DYNLL2         | 14.806393 | 15.640908  | -2.7670549 | 1.21E-10 | dynein light chain LC8-type 2                      |

|     |              |           |           |            |            |                                                               |
|-----|--------------|-----------|-----------|------------|------------|---------------------------------------------------------------|
| 173 | 238116_at    | DYNLRB2   | 17.347748 | 18.686626  | -3.0100684 | 9.66E-12 dynein light chain roadblock-type 2                  |
| 174 | 202623_at    | EAPP      | 19.514346 | 21.76776   | -1.3935298 | 1.08E-12 E2F associated phosphoprotein                        |
| 175 | 225993_at    | EARS2     | 11.666097 | 12.535612  | -0.9538488 | 2.61E-09 glutamyl-tRNA synthetase 2, mitochondrial            |
| 176 | 225275_at    | EDIL3     | 24.352066 | -30.959407 | 8.4201672  | 6.34E-15 EGF like repeats and discoidin domains 3             |
| 177 | 207379_at    | EDIL3     | 11.691295 | -12.558104 | 3.7819109  | 2.55E-09 EGF like repeats and discoidin domains 3             |
| 178 | 204540_at    | EEF1A2    | 12.163213 | 12.986021  | -3.6996443 | 1.61E-09 eukaryotic translation elongation factor 1 alpha 2   |
| 179 | 224999_at    | EGFR      | 11.769322 | -12.627978 | 4.033678   | 2.36E-09 epidermal growth factor receptor                     |
| 180 | 211937_at    | EIF4B     | 11.775693 | 12.633698  | -2.0744612 | 2.35E-09 eukaryotic translation initiation factor 4B          |
| 181 | 221773_at    | ELK3      | 10.704964 | -11.703569 | 3.3540828  | 6.64E-09 ELK3, ETS transcription factor                       |
| 182 | 226099_at    | ELL2      | 12.769406 | -13.554932 | 3.799616   | 8.91E-10 elongation factor for RNA polymerase II 2            |
| 183 | 219411_at    | ELMO3     | 18.803183 | 20.700202  | -2.8557733 | 2.22E-12 engulfment and cell motility 3                       |
| 184 | 201324_at    | EMP1      | 18.956051 | -20.924775 | 6.1540808  | 1.90E-12 epithelial membrane protein 1                        |
| 185 | 201325_s_at  | EMP1      | 13.370004 | -14.14103  | 3.9879357  | 4.95E-10 epithelial membrane protein 1                        |
| 186 | 225078_at    | EMP2      | 17.112782 | 18.381367  | -3.819828  | 1.22E-11 epithelial membrane protein 2                        |
| 187 | 225079_at    | EMP2      | 12.157275 | 12.980557  | -3.3388533 | 1.62E-09 epithelial membrane protein 2                        |
| 188 | 203729_at    | EMP3      | 19.302064 | -21.442931 | 5.5101551  | 1.34E-12 epithelial membrane protein 3                        |
| 189 | 201231_s_at  | ENO1      | 10.999782 | -11.953539 | 1.8887219  | 4.99E-09 enolase 1                                            |
| 190 | 201719_s_at  | EPB41L2   | 10.300766 | -11.36811  | 3.0099591  | 9.82E-09 erythrocyte membrane protein band 4.1 like 2         |
| 191 | 229292_at    | EPB41L5   | 13.22561  | 13.998017  | -4.090548  | 5.71E-10 erythrocyte membrane protein band 4.1 like 5         |
| 192 | 209368_at    | EPHX2     | 12.017573 | 12.852592  | -2.367665  | 1.85E-09 epoxide hydrolase 2                                  |
| 193 | 220318_at    | EPN3      | 15.588461 | 16.521042  | -1.8926381 | 5.58E-11 epsin 3                                              |
| 194 | 223895_s_at  | EPN3      | 12.695299 | 13.484188  | -3.0764159 | 9.58E-10 epsin 3                                              |
| 195 | 232164_s_at  | EPPK1     | 22.936505 | 27.857797  | -5.0239339 | 2.98E-14 epiplakin 1                                          |
| 196 | 232165_at    | EPPK1     | 22.627904 | 27.233154  | -4.4261927 | 4.15E-14 epiplakin 1                                          |
| 197 | 216836_s_at  | ERBB2     | 15.681487 | 16.628933  | -1.6559781 | 5.09E-11 erb-b2 receptor tyrosine kinase 2                    |
| 198 | 202454_s_at  | ERBB3     | 23.415445 | 28.862144  | -5.9579922 | 1.77E-14 erb-b2 receptor tyrosine kinase 3                    |
| 199 | 226213_at    | ERBB3     | 18.45256  | 20.194879  | -6.0122124 | 3.17E-12 erb-b2 receptor tyrosine kinase 3                    |
| 200 | 1563253_s_at | ERBB3     | 11.73548  | 12.59763   | -1.6857199 | 2.44E-09 erb-b2 receptor tyrosine kinase 3                    |
| 201 | 214053_at    | ERBB4     | 28.90698  | 44.675428  | -4.9634768 | 2.86E-17 erb-b2 receptor tyrosine kinase 4                    |
| 202 | 206794_at    | ERBB4     | 12.752264 | 13.538538  | -1.4695374 | 9.06E-10 erb-b2 receptor tyrosine kinase 4                    |
| 203 | 205225_at    | ESR1      | 30.988244 | 54.129848  | -7.4798547 | 1.67E-18 estrogen receptor 1                                  |
| 204 | 225846_at    | ESRP1     | 35.091865 | 88.61056   | -7.0315518 | 1.12E-21 epithelial splicing regulatory protein 1             |
| 205 | 219121_s_at  | ESRP1     | 24.009498 | 30.170832  | -5.4778632 | 9.26E-15 epithelial splicing regulatory protein 1             |
| 206 | 201931_at    | ETFA      | 11.127752 | 12.063465  | -1.5892204 | 4.41E-09 electron transfer flavoprotein alpha subunit         |
| 207 | 224833_at    | ETS1      | 31.643838 | -57.814483 | 6.7613471  | 6.30E-19 ETS proto-oncogene 1, transcription factor           |
| 208 | 1555355_a_at | ETS1      | 17.183779 | -18.473055 | 3.9507986  | 1.14E-11 ETS proto-oncogene 1, transcription factor           |
| 209 | 221911_at    | ETV1      | 11.343483 | -12.250766 | 4.080814   | 3.57E-09 ETS variant 1                                        |
| 210 | 203349_s_at  | ETV5      | 17.855128 | -19.363966 | 4.2494585  | 5.80E-12 ETS variant 5                                        |
| 211 | 230102_at    | ETV5      | 16.257611 | -17.312995 | 4.1692305  | 2.87E-11 ETS variant 5                                        |
| 212 | 203348_s_at  | ETV5      | 15.283791 | -16.172522 | 3.1537212  | 7.54E-11 ETS variant 5                                        |
| 213 | 225764_at    | ETV6      | 21.426035 | -24.95435  | 1.8043359  | 1.48E-13 ETS variant 6                                        |
| 214 | 235056_at    | ETV6      | 17.383664 | -18.733748 | 2.5669673  | 9.32E-12 ETS variant 6                                        |
| 215 | 239364_at    | ETV6      | 14.283226 | -15.077835 | 1.1006902  | 2.02E-10 ETS variant 6                                        |
| 216 | 218363_at    | EXD2      | 17.361647 | 18.704847  | -1.6034719 | 9.53E-12 exonuclease 3'-5' domain containing 2                |
| 217 | 230183_at    | EXT1      | 24.046115 | -30.253902 | 3.6072121  | 8.89E-15 exostosin glycosyltransferase 1                      |
| 218 | 214985_at    | EXT1      | 15.880202 | -16.861761 | 2.6929795  | 4.18E-11 exostosin glycosyltransferase 1                      |
| 219 | 230792_at    | FAAH2     | 11.467182 | 12.359304  | -1.0202304 | 3.17E-09 fatty acid amide hydrolase 2                         |
| 220 | 226863_at    | FAM110C   | 12.523909 | 13.321862  | -3.0689197 | 1.13E-09 family with sequence similarity 110 member C         |
| 221 | 225395_s_at  | FAM120AOS | 13.79687  | 14.571851  | -1.7130811 | 3.26E-10 family with sequence similarity 120A opposite strand |
| 222 | 212771_at    | FAM171A1  | 15.04064  | -15.899584 | 4.1183219  | 9.59E-11 family with sequence similarity 171 member A1        |
| 223 | 51158_at     | FAM174B   | 15.425045 | 16.333192  | -2.5188928 | 6.56E-11 family with sequence similarity 174 member B         |
| 224 | 221880_s_at  | FAM174B   | 12.816696 | 13.600255  | -2.1241596 | 8.51E-10 family with sequence similarity 174 member B         |
| 225 | 1557014_a_at | FAM201A   | 13.756924 | 14.531018  | -2.1779456 | 3.39E-10 family with sequence similarity 201 member A         |
| 226 | 225327_at    | FAM214A   | 19.66798  | 22.006227  | -3.9248275 | 9.19E-13 family with sequence similarity 214 member A         |
| 227 | 227811_at    | FGD3      | 16.273169 | 17.331855  | -1.7174962 | 2.83E-11 FYVE, RhoGEF and PH domain containing 3              |
| 228 | 227948_at    | FGD4      | 11.22264  | 12.145539  | -2.4337312 | 4.02E-09 FYVE, RhoGEF and PH domain containing 4              |
| 229 | 226705_at    | FGFR1     | 13.202903 | -13.975651 | 2.1082059  | 5.83E-10 fibroblast growth factor receptor 1                  |
| 230 | 200895_s_at  | FKBP4     | 12.028304 | 12.862382  | -1.7779711 | 1.84E-09 FK506 binding protein 4                              |
| 231 | 200859_x_at  | FLNA      | 10.909702 | -11.87668  | 2.7311361  | 5.44E-09 filamin A                                            |
| 232 | 213746_s_at  | FLNA      | 10.583808 | -11.602148 | 2.9987041  | 7.47E-09 filamin A                                            |
| 233 | 214752_x_at  | FLNA      | 10.495559 | -11.528745 | 2.810784   | 8.13E-09 filamin A                                            |
| 234 | 226184_at    | FMNL2     | 11.332299 | -12.240994 | 4.3994401  | 3.61E-09 formin like 2                                        |
| 235 | 204420_at    | FOSL1     | 16.326732 | -17.396947 | 4.238034   | 2.68E-11 FOS like 1, AP-1 transcription factor subunit        |
| 236 | 225262_at    | FOSL2     | 14.699519 | -15.524255 | 2.274496   | 1.34E-10 FOS like 2, AP-1 transcription factor subunit        |
| 237 | 218881_s_at  | FOSL2     | 13.849216 | -14.625525 | 1.5974342  | 3.10E-10 FOS like 2, AP-1 transcription factor subunit        |
| 238 | 218880_at    | FOSL2     | 11.324708 | -12.234366 | 2.7043648  | 3.64E-09 FOS like 2, AP-1 transcription factor subunit        |
| 239 | 204667_at    | FOXA1     | 23.79936  | 29.699606  | -5.9499635 | 1.17E-14 forkhead box A1                                      |
| 240 | 237086_at    | FOXA1     | 21.619697 | 25.305911  | -6.0268709 | 1.21E-13 forkhead box A1                                      |
| 241 | 219889_at    | FRAT1     | 21.228685 | 24.601916  | -2.8254625 | 1.82E-13 frequently rearranged in advanced T-cell lymphomas 1 |
| 242 | 209864_at    | FRAT2     | 14.864842 | 15.705066  | -2.3463377 | 1.14E-10 frequently rearranged in advanced T-cell lymphomas 2 |
| 243 | 226045_at    | FRS2      | 11.535033 | 12.419197  | -1.1050327 | 2.97E-09 fibroblast growth factor receptor substrate 2        |
| 244 | 226847_at    | FST       | 26.333856 | -36.08801  | 5.1104072  | 6.67E-16 follistatin                                          |
| 245 | 204948_s_at  | FST       | 21.030073 | -24.253017 | 2.5572539  | 2.24E-13 follistatin                                          |
| 246 | 212788_x_at  | FTL       | 12.21208  | -17.031069 | 1.3860756  | 1.53E-09 ferritin light chain                                 |
| 247 | 202489_s_at  | FXYD3     | 24.238874 | 30.695989  | -3.5990263 | 7.19E-15 FXYP domain containing ion transport regulator 3     |
| 248 | 205219_s_at  | GALK2     | 12.631652 | 13.423697  | -1.3836109 | 1.02E-09 galactokinase 2                                      |
| 249 | 204921_at    | GAS8      | 10.592537 | 11.609429  | -0.8452562 | 7.40E-09 growth arrest specific 8                             |
| 250 | 209603_at    | GATA3     | 22.025469 | 26.061493  | -5.9391549 | 7.87E-14 GATA binding protein 3                               |
| 251 | 210002_at    | GATA6     | 13.595019 | -14.366616 | 3.9900622  | 3.97E-10 GATA binding protein 6                               |
| 252 | 223434_at    | GBP3      | 15.679544 | -16.626672 | 5.9024071  | 5.10E-11 guanylate binding protein 3                          |
| 253 | 234986_at    | GCLM      | 16.962105 | -21.082127 | 2.6855658  | 1.71E-12 glutamate-cysteine ligase modifier subunit           |
| 254 | 203925_at    | GCLM      | 17.153721 | -18.434179 | 2.1796376  | 1.17E-11 glutamate-cysteine ligase modifier subunit           |
| 255 | 215380_s_at  | GGCT      | 13.737181 | 14.510875  | -1.2575306 | 3.46E-10 gamma-glutamylcyclotransferase                       |
| 256 | 225604_s_at  | GLIPR2    | 21.804314 | -25.646449 | 1.96229    | 9.95E-14 GLI pathogenesis related 2                           |
| 257 | 225602_at    | GLIPR2    | 13.239898 | -14.012109 | 1.3144352  | 5.63E-10 GLI pathogenesis related 2                           |
| 258 | 218241_at    | GOLGA5    | 14.707135 | 15.532539  | -1.2010507 | 1.33E-10 golgin A5                                            |
| 259 | 229372_at    | GOLTI1A   | 13.172922 | 13.946169  | -2.149709  | 6.01E-10 golgi transport 1A                                   |



|     |              |                  |           |            |            |          |                                                                       |
|-----|--------------|------------------|-----------|------------|------------|----------|-----------------------------------------------------------------------|
| 260 | 212510_at    | GPD1L            | 11.807268 | 12.662083  | -2.6204133 | 2.28E-09 | glycerol-3-phosphate dehydrogenase 1-like                             |
| 261 | 223423_at    | GPR160           | 15.436826 | 16.346663  | -4.9301348 | 6.48E-11 | G protein-coupled receptor 160                                        |
| 262 | 214104_at    | GPR161           | 10.609588 | -11.623666 | 1.899168   | 7.28E-09 | G protein-coupled receptor 161                                        |
| 263 | 227769_at    | GPR27            | 20.132244 | 22.744629  | -4.38935   | 5.70E-13 | G protein-coupled receptor 27                                         |
| 264 | 225463_x_at  | GPR89A//GPR89B   | 12.19451  | 13.014856  | -1.2241209 | 1.56E-09 | G protein-coupled receptor 89A//G protein-coupled receptor 89B        |
| 265 | 222140_s_at  | GPR89A//GPR89B   | 10.686242 | 11.687847  | -1.2771739 | 6.76E-09 | G protein-coupled receptor 89A//G protein-coupled receptor 89B        |
| 266 | 220642_x_at  | GPR89A//GPR89B   | 10.384085 | 11.436586  | -1.186384  | 9.06E-09 | G protein-coupled receptor 89A//G protein-coupled receptor 89B        |
| 267 | 200736_s_at  | GPX1             | 26.390008 | -36.249327 | 7.3205306  | 6.24E-16 | glutathione peroxidase 1                                              |
| 268 | 205862_at    | GREB1            | 31.830641 | 58.94527   | -7.4059686 | 4.73E-19 | growth regulation by estrogen in breast cancer 1                      |
| 269 | 222830_at    | GRHL1            | 25.823444 | 34.665456  | -4.2887244 | 1.21E-15 | grainyhead like transcription factor 1                                |
| 270 | 1552685_a_at | GRHL1            | 18.475674 | 20.22778   | -1.9155796 | 3.10E-12 | grainyhead like transcription factor 1                                |
| 271 | 219388_at    | GRHL2            | 31.147097 | 54.98483   | -4.7360054 | 1.33E-18 | grainyhead like transcription factor 2                                |
| 272 | 212056_at    | GSE1             | 18.262813 | 19.926942  | -3.6501937 | 3.84E-12 | Gse1 coiled-coil protein                                              |
| 273 | 212057_at    | GSE1             | 13.67208  | 14.444646  | -3.7611205 | 3.68E-10 | Gse1 coiled-coil protein                                              |
| 274 | 227163_at    | GSTO2            | 22.648173 | 27.273658  | -3.9766775 | 4.06E-14 | glutathione S-transferase omega 2                                     |
| 275 | 200824_at    | GSTP1            | 23.248932 | -28.508008 | 4.3439872  | 2.12E-14 | glutathione S-transferase pi 1                                        |
| 276 | 213357_at    | GTF2H5           | 10.868731 | -11.841863 | 0.8018362  | 5.66E-09 | general transcription factor IIH subunit 5                            |
| 277 | 214500_at    | H2AFY            | 15.472209 | -16.387189 | 1.4552035  | 6.26E-11 | H2A histone family member Y                                           |
| 278 | 218445_at    | H2AFY2           | 24.471759 | 31.241093  | -1.8122536 | 5.55E-15 | H2A histone family member Y2                                          |
| 279 | 227008_at    | HDCC3            | 14.955941 | 15.805575  | -1.5933042 | 1.04E-10 | HD domain containing 3                                                |
| 280 | 244593_at    | HID1             | 13.238212 | 14.010445  | -1.4430592 | 5.64E-10 | HID1 domain containing                                                |
| 281 | 218507_at    | HILPDA           | 17.702756 | 19.15789   | -2.2074304 | 6.76E-12 | hypoxia inducible lipid droplet associated                            |
| 282 | 1554452_a_at | HILPDA           | 14.899937 | 15.743712  | -2.262191  | 1.10E-10 | hypoxia inducible lipid droplet associated                            |
| 283 | 214469_at    | HIST1H2AE        | 13.204475 | 13.977198  | -2.9745139 | 5.82E-10 | histone cluster 1, H2ae                                               |
| 284 | 236278_at    | HIST1H3E         | 17.182591 | 18.471517  | -3.0756637 | 1.14E-11 | histone cluster 1, H3e                                                |
| 285 | 214616_at    | HIST1H3E         | 11.627493 | 12.501223  | -1.2506463 | 2.71E-09 | histone cluster 1, H3e                                                |
| 286 | 206110_at    | HIST1H3F//HIST1H | 11.259297 | 12.177376  | -2.8773403 | 3.88E-09 | histone cluster 1, H3f//histone cluster 1, H3b//histone cluster 1, H3 |
| 287 | 208180_s_at  | HIST1H4H         | 16.067972 | 17.084762  | -1.9373812 | 3.47E-11 | histone cluster 1, H4h                                                |
| 288 | 202708_s_at  | HIST2H2BE        | 11.684414 | 12.551959  | -3.6105719 | 2.57E-09 | histone cluster 2, H2be                                               |
| 289 | 225792_at    | HOOK1            | 29.834504 | 48.532356  | -4.7608213 | 8.41E-18 | hook microtubule tethering protein 1                                  |
| 290 | 203280_s_at  | HS2ST1           | 10.697654 | -11.697429 | 0.9470543  | 6.69E-09 | heparan sulfate 2-O-sulfotransferase 1                                |
| 291 | 200942_s_at  | HSBP1            | 13.212236 | 13.98484   | -0.9861937 | 5.78E-10 | heat shock factor binding protein 1                                   |
| 292 | 223248_at    | HSDL1            | 15.63965  | 16.580324  | -1.4635998 | 5.30E-11 | hydroxysteroid dehydrogenase like 1                                   |
| 293 | 207949_s_at  | ICA1             | 27.699408 | 40.314676  | -3.4250049 | 1.30E-16 | islet cell autoantigen 1                                              |
| 294 | 210547_x_at  | ICA1             | 22.362205 | 26.708816  | -3.9323294 | 5.51E-14 | islet cell autoantigen 1                                              |
| 295 | 206332_s_at  | IFI16            | 13.072613 | -13.847951 | 6.3106596  | 6.63E-10 | interferon gamma inducible protein 16                                 |
| 296 | 208966_x_at  | IFI16            | 10.979163 | -11.935908 | 5.7280749  | 5.09E-09 | interferon gamma inducible protein 16                                 |
| 297 | 225330_at    | IGF1R            | 13.503302 | 14.274263  | -2.4794672 | 4.35E-10 | insulin like growth factor 1 receptor                                 |
| 298 | 218847_at    | IGF2BP2          | 15.213119 | -16.092722 | 3.732705   | 8.09E-11 | insulin like growth factor 2 mRNA binding protein 2                   |
| 299 | 202718_at    | IGFBP2           | 16.834737 | 18.026791  | -3.9586144 | 1.61E-11 | insulin like growth factor binding protein 2                          |
| 300 | 201163_s_at  | IGFBP7           | 21.226    | -24.597161 | 6.8118463  | 1.83E-13 | insulin like growth factor binding protein 7                          |
| 301 | 201162_at    | IGFBP7           | 11.076157 | -12.019041 | 5.0848926  | 4.63E-09 | insulin like growth factor binding protein 7                          |
| 302 | 219255_x_at  | IL17RB           | 21.371976 | 24.857231  | -2.1706107 | 1.57E-13 | interleukin 17 receptor B                                             |
| 303 | 224156_x_at  | IL17RB           | 16.87818  | 18.081724  | -2.3385482 | 1.55E-11 | interleukin 17 receptor B                                             |
| 304 | 224361_s_at  | IL17RB           | 15.173202 | 16.04782   | -1.8878241 | 8.41E-11 | interleukin 17 receptor B                                             |
| 305 | 243541_at    | IL31RA           | 12.869918 | -13.651429 | 2.1723202  | 8.08E-10 | interleukin 31 receptor A                                             |
| 306 | 205207_at    | IL6              | 18.063119 | -19.649046 | 4.0830339  | 4.70E-12 | interleukin 6                                                         |
| 307 | 235583_at    | ILDR1            | 16.282743 | 17.343472  | -2.3923663 | 2.80E-11 | immunoglobulin like domain containing receptor 1                      |
| 308 | 204030_s_at  | IQCJ-SCHIP1//SCH | 19.269178 | -21.393086 | 3.6451413  | 1.38E-12 | IQCJ-SCHIP1 readthrough//schwannomin interacting protein 1            |
| 309 | 1552477_a_at | IRF6             | 14.4555   | 15.261055  | -3.5563517 | 1.71E-10 | interferon regulatory factor 6                                        |
| 310 | 228462_at    | IRX2             | 10.881645 | 11.852828  | -3.4917452 | 5.59E-09 | iroquois homeobox 2                                                   |
| 311 | 1553678_a_at | ITGB1            | 18.100906 | -19.701313 | 2.6613083  | 4.53E-12 | integrin subunit beta 1                                               |
| 312 | 211945_s_at  | ITGB1            | 17.524172 | -18.919291 | 1.9346283  | 8.09E-12 | integrin subunit beta 1                                               |
| 313 | 1553530_a_at | ITGB1            | 16.751293 | -17.921757 | 2.6859748  | 1.76E-11 | integrin subunit beta 1                                               |
| 314 | 225582_at    | ITPRIP           | 16.10534  | -17.129493 | 2.4074639  | 3.34E-11 | inositol 1,4,5-trisphosphate receptor interacting protein             |
| 315 | 227677_at    | JAK3             | 12.356574 | 13.165093  | -1.5321551 | 1.33E-09 | Janus kinase 3                                                        |
| 316 | 229139_at    | JPH1             | 15.048139 | 15.907934  | -3.8951316 | 9.52E-11 | junctophilin 1                                                        |
| 317 | 200048_s_at  | JTB              | 12.692959 | 13.481959  | -0.712543  | 9.60E-10 | jumping translocation breakpoint                                      |
| 318 | 210434_x_at  | JTB              | 11.900835 | 12.74653   | -0.6709257 | 2.08E-09 | jumping translocation breakpoint                                      |
| 319 | 210927_x_at  | JTB              | 11.661823 | 12.531801  | -0.7039762 | 2.62E-09 | jumping translocation breakpoint                                      |
| 320 | 218418_s_at  | KANK2            | 15.243328 | -16.126785 | 1.898375   | 7.85E-11 | KN motif and ankyrin repeat domains 2                                 |
| 321 | 227713_at    | KATNAL1          | 10.508586 | -11.539555 | 1.9106614  | 8.03E-09 | katanin catalytic subunit A1 like 1                                   |
| 322 | 223658_at    | CKNK6            | 13.486008 | 14.256911  | -2.46269   | 4.42E-10 | potassium two pore domain channel subfamily K member 6                |
| 323 | 212192_at    | KCTD12           | 19.561307 | -21.840348 | 5.6567226  | 1.02E-12 | potassium channel tetramerization domain containing 12                |
| 324 | 212188_at    | KCTD12           | 16.265526 | -17.322587 | 3.5799425  | 2.85E-11 | potassium channel tetramerization domain containing 12                |
| 325 | 203143_s_at  | KIAA0040         | 18.603322 | 20.410515  | -2.4360677 | 2.72E-12 | KIAA0040                                                              |
| 326 | 221874_at    | KIAA1324         | 21.284855 | 24.701636  | -4.5540311 | 1.72E-13 | KIAA1324                                                              |
| 327 | 243349_at    | KIAA1324         | 18.834395 | 20.745842  | -3.4172029 | 2.15E-12 | KIAA1324                                                              |
| 328 | 226248_s_at  | KIAA1324         | 18.128971 | 19.740229  | -5.290602  | 4.40E-12 | KIAA1324                                                              |
| 329 | 225303_at    | KIRREL           | 11.679223 | -12.547325 | 4.0420187  | 2.58E-09 | kin of IRRE like (Drosophila)                                         |
| 330 | 227261_at    | KLF12            | 17.664553 | -19.106584 | 3.5250844  | 7.03E-12 | Kruppel like factor 12                                                |
| 331 | 225068_at    | KLHL12           | 12.376296 | 13.183483  | -1.7136656 | 1.31E-09 | kelch like family member 12                                           |
| 332 | 220239_at    | KLHL7            | 12.658477 | -13.449161 | 2.0310658  | 9.93E-10 | kelch like family member 7                                            |
| 333 | 221503_s_at  | KPNA3            | 10.785148 | -11.771107 | 1.4043157  | 6.14E-09 | karyopherin subunit alpha 3                                           |
| 334 | 221502_at    | KPNA3            | 10.571233 | -11.591664 | 1.5061742  | 7.56E-09 | karyopherin subunit alpha 3                                           |
| 335 | 213803_at    | KPNB1            | 11.182289 | -12.110578 | 1.0623066  | 4.18E-09 | karyopherin subunit beta 1                                            |
| 336 | 203042_at    | LAMP2            | 11.380492 | -12.283151 | 1.4209086  | 3.45E-09 | lysosomal associated membrane protein 2                               |
| 337 | 201030_x_at  | LDHB             | 22.11271  | -26.227397 | 5.7117346  | 7.18E-14 | lactate dehydrogenase B                                               |
| 338 | 218604_at    | LEMD3            | 20.286256 | 22.995661  | -1.5055296 | 4.86E-13 | LEM domain containing 3                                               |
| 339 | 201105_at    | LGALS1           | 10.454065 | -11.494368 | 2.630749   | 8.47E-09 | galectin 1                                                            |
| 340 | 226413_at    | LINC00938        | 11.177543 | 12.106472  | -2.8558588 | 4.20E-09 | long intergenic non-protein coding RNA 938                            |
| 341 | 1559827_at   | LINC00960        | 11.233582 | -12.155035 | 3.1713725  | 3.98E-09 | long intergenic non-protein coding RNA 960                            |
| 342 | 239319_at    | LINC00992        | 18.614408 | 20.426468  | -6.7802993 | 2.69E-12 | long intergenic non-protein coding RNA 992                            |
| 343 | 228348_at    | LINS1            | 11.536856 | 12.42081   | -1.077825  | 2.96E-09 | lines homolog 1                                                       |
| 344 | 235036_at    | LIX1L            | 17.025493 | -18.269285 | 2.6249268  | 1.33E-11 | limb and CNS expressed 1 like                                         |
| 345 | 225793_at    | LIX1L            | 11.589227 | -12.467218 | 3.0214811  | 2.81E-09 | limb and CNS expressed 1 like                                         |
| 346 | 203713_s_at  | LLGL2            | 11.753017 | 12.613348  | -2.3633542 | 2.40E-09 | LLGL2, scribble cell polarity complex component                       |

|     |              |                  |           |            |            |          |                                                                  |
|-----|--------------|------------------|-----------|------------|------------|----------|------------------------------------------------------------------|
| 347 | 230641_at    | LOC100505938     | 16.775714 | 17.952431  | -2.3194943 | 1.71E-11 | uncharacterized LOC100505938                                     |
| 348 | 202237_at    | LOC101928916///N | 25.086258 | -32.740289 | 7.8991912  | 2.79E-15 | uncharacterized LOC101928916///nicotinamide N-methyltransferase  |
| 349 | 202238_s_at  | LOC101928916///N | 20.18267  | -22.826481 | 6.1475169  | 5.41E-13 | uncharacterized LOC101928916///nicotinamide N-methyltransferase  |
| 350 | 1568763_s_at | LOC102724884///L | 15.728663 | 16.683915  | -2.1290957 | 4.85E-11 | uncharacterized LOC102724884///programmed cell death 6 pseudog   |
| 351 | 1569110_x_at | LOC728613        | 10.717322 | 11.713956  | -2.7892421 | 6.56E-09 | programmed cell death 6 pseudogene                               |
| 352 | 1568764_x_at | LOC728613///PDCC | 18.98631  | 20.96954   | -2.0326654 | 1.84E-12 | programmed cell death 6 pseudogene///programmed cell death 6     |
| 353 | 225996_at    | LONRF2           | 18.302626 | 19.982845  | -3.9855802 | 3.69E-12 | LON peptidase N-terminal domain and ring finger 2                |
| 354 | 202998_s_at  | LOXL2            | 17.49569  | -18.881526 | 7.6256585  | 8.33E-12 | lysyl oxidase like 2                                             |
| 355 | 220253_s_at  | LRP12            | 14.063796 | -14.847513 | 4.3193623  | 2.51E-10 | LDL receptor related protein 12                                  |
| 356 | 219631_at    | LRP12            | 13.740961 | -14.51473  | 4.0549297  | 3.44E-10 | LDL receptor related protein 12                                  |
| 357 | 207358_x_at  | MACF1            | 16.395408 | -17.480767 | 2.5573746  | 2.50E-11 | microtubule-actin crosslinking factor 1                          |
| 358 | 208634_s_at  | MACF1            | 15.075989 | -15.938981 | 2.3602511  | 9.26E-11 | microtubule-actin crosslinking factor 1                          |
| 359 | 214894_x_at  | MACF1            | 14.985608 | -15.83844  | 2.676754   | 1.01E-10 | microtubule-actin crosslinking factor 1                          |
| 360 | 208633_s_at  | MACF1            | 14.011546 | -14.793166 | 2.4030432  | 2.64E-10 | microtubule-actin crosslinking factor 1                          |
| 361 | 215222_x_at  | MACF1            | 13.641641 | -14.413777 | 2.3335942  | 3.80E-10 | microtubule-actin crosslinking factor 1                          |
| 362 | 36711_at     | MAFF             | 15.400853 | -16.305563 | 5.3893989  | 6.72E-11 | MAF bZIP transcription factor F                                  |
| 363 | 205193_at    | MAFF             | 10.932177 | -11.895817 | 2.827436   | 5.33E-09 | MAF bZIP transcription factor F                                  |
| 364 | 224650_at    | MAL2             | 28.739667 | 44.030259  | -7.3922415 | 3.55E-17 | mal, T-cell differentiation protein 2 (gene/pseudogene)          |
| 365 | 235457_at    | MAML2            | 10.906601 | -11.874042 | 3.0804246  | 5.46E-09 | mastermind like transcriptional coactivator 2                    |
| 366 | 242794_at    | MAML3            | 15.442964 | 16.353686  | -2.7318214 | 6.44E-11 | mastermind like transcriptional coactivator 3                    |
| 367 | 226084_at    | MAP1B            | 16.361171 | -17.438929 | 5.4944646  | 2.59E-11 | microtubule associated protein 1B                                |
| 368 | 212233_at    | MAP1B            | 15.177304 | -16.052429 | 5.0882384  | 8.38E-11 | microtubule associated protein 1B                                |
| 369 | 215477_at    | MAP1B            | 14.313983 | -15.110391 | 3.5640083  | 1.96E-10 | microtubule associated protein 1B                                |
| 370 | 212566_at    | MAP4             | 14.583883 | -15.398987 | 1.8082305  | 1.50E-10 | microtubule associated protein 4                                 |
| 371 | 212567_s_at  | MAP4             | 11.577312 | -12.456646 | 1.3445384  | 2.85E-09 | microtubule associated protein 4                                 |
| 372 | 243_g_at     | MAP4             | 11.547605 | -12.430322 | 1.5896072  | 2.93E-09 | microtubule associated protein 4                                 |
| 373 | 202890_at    | MAP7             | 19.659984 | 21.993744  | -4.4854909 | 9.26E-13 | microtubule associated protein 7                                 |
| 374 | 202889_x_at  | MAP7             | 17.036245 | 18.283052  | -2.3225517 | 1.32E-11 | microtubule associated protein 7                                 |
| 375 | 215471_s_at  | MAP7             | 15.494585 | 16.412869  | -1.9999055 | 6.12E-11 | microtubule associated protein 7                                 |
| 376 | 217943_s_at  | MAP7D1           | 11.08385  | -12.025655 | 2.0036641  | 4.60E-09 | MAP7 domain containing 1                                         |
| 377 | 206401_s_at  | MAPT             | 13.269263 | 14.04111   | -1.3640819 | 5.47E-10 | microtubule associated protein tau                               |
| 378 | 203928_x_at  | MAPT             | 12.698761 | 13.487485  | -1.2410475 | 9.55E-10 | microtubule associated protein tau                               |
| 379 | 201669_s_at  | MARCKS           | 33.636481 | -72.392293 | 8.1335987  | 2.24E-20 | myristoylated alanine rich protein kinase C substrate            |
| 380 | 201670_s_at  | MARCKS           | 30.612932 | -52.196677 | 7.0687728  | 2.86E-18 | myristoylated alanine rich protein kinase C substrate            |
| 381 | 225897_at    | MARCKS           | 27.977851 | -41.262493 | 6.9147492  | 9.25E-17 | myristoylated alanine rich protein kinase C substrate            |
| 382 | 213002_at    | MARCKS           | 21.720863 | -25.491858 | 4.0198479  | 1.09E-13 | myristoylated alanine rich protein kinase C substrate            |
| 383 | 201668_x_at  | MARCKS           | 21.585423 | -25.243275 | 4.2117993  | 1.25E-13 | myristoylated alanine rich protein kinase C substrate            |
| 384 | 235955_at    | MARVELD2         | 14.049762 | 14.832897  | -2.6558424 | 2.54E-10 | MARVEL domain containing 2                                       |
| 385 | 233634_at    | MARVELD3         | 10.314772 | 11.379597  | -1.5433593 | 9.69E-09 | MARVEL domain containing 3                                       |
| 386 | 204179_at    | MB               | 12.370142 | 13.177742  | -3.8089292 | 1.32E-09 | myoglobin                                                        |
| 387 | 226797_at    | MBTD1            | 15.713022 | 16.665665  | -1.7140712 | 4.93E-11 | mbt domain containing 1                                          |
| 388 | 225160_x_at  | MDM2             | 12.939471 | 13.718572  | -1.8069746 | 7.55E-10 | MDM2 proto-oncogene                                              |
| 389 | 212209_at    | MED13L           | 10.472091 | 11.509291  | -2.0634174 | 8.32E-09 | mediator complex subunit 13 like                                 |
| 390 | 225222_at    | MFS14A           | 13.09675  | -13.871526 | 1.1760893  | 6.47E-10 | major facilitator superfamily domain containing 14A              |
| 391 | 212473_s_at  | MICAL2           | 10.635519 | -11.645344 | 5.6395775  | 7.10E-09 | microtubule associated monoxygenase, calponin and LIM domain c   |
| 392 | 225381_at    | MIR100HG         | 11.610191 | -12.485838 | 5.3775906  | 2.76E-09 | mir-100-let-7a-2 cluster host gene                               |
| 393 | 214696_at    | MIR22///MIR22HG  | 12.428708 | -13.232466 | 2.6172074  | 1.24E-09 | microRNA 22///MIR22 host gene                                    |
| 394 | 212594_at    | MIR4680///PDCC4  | 11.597613 | 12.474663  | -2.9137552 | 2.79E-09 | microRNA 4680///programmed cell death 4 (neoplastic transformati |
| 395 | 225374_at    | MIR4723///TMEM1' | 11.794981 | 12.651031  | -0.9042546 | 2.30E-09 | microRNA 4723///transmembrane protein 199                        |
| 396 | 219395_at    | MIR6773///ESRP2  | 16.990135 | 18.224084  | -3.6103205 | 1.38E-11 | microRNA 6773///epithelial splicing regulatory protein 2         |
| 397 | 226066_at    | MITF             | 14.82089  | 15.656798  | 3.034376   | 1.19E-10 | melanogenesis associated transcription factor                    |
| 398 | 207233_s_at  | MITF             | 11.744799 | -12.605981 | 2.2590472  | 2.42E-09 | melanogenesis associated transcription factor                    |
| 399 | 1555820_a_at | MKS1             | 11.016917 | 11.968208  | -1.2390602 | 4.91E-09 | Meckel syndrome, type 1                                          |
| 400 | 238451_at    | MPP7             | 14.831644 | 15.668595  | -5.0425673 | 1.18E-10 | membrane palmitoylated protein 7                                 |
| 401 | 238778_at    | MPP7             | 12.803095 | 13.587206  | -5.3712205 | 8.62E-10 | membrane palmitoylated protein 7                                 |
| 402 | 227747_at    | MPZL3            | 18.466885 | 20.215262  | -2.9416083 | 3.13E-12 | myelin protein zero like 3                                       |
| 403 | 212199_at    | MRFAP1L1         | 12.136148 | 12.961131  | -1.3786623 | 1.65E-09 | Morf4 family associated protein 1 like 1                         |
| 404 | 200600_at    | MSN              | 20.733516 | -23.742571 | 6.9919994  | 3.06E-13 | moesin                                                           |
| 405 | 210319_x_at  | MSX2             | 13.384515 | 14.155477  | -3.8498471 | 4.88E-10 | msh homeobox 2                                                   |
| 406 | 205555_s_at  | MSX2             | 11.695396 | 12.561768  | -3.3165071 | 2.54E-09 | msh homeobox 2                                                   |
| 407 | 213358_at    | MTCL1            | 26.730432 | -37.248886 | 4.243866   | 4.18E-16 | microtubule crosslinking factor 1                                |
| 408 | 202180_s_at  | MVP              | 20.467831 | -23.295634 | 2.527471   | 4.03E-13 | major vault protein                                              |
| 409 | 204798_at    | MYB              | 18.446317 | 20.186002  | -5.7119466 | 3.19E-12 | MYB proto-oncogene, transcription factor                         |
| 410 | 215152_at    | MYB              | 10.805755 | 11.788518  | -1.1295243 | 6.02E-09 | MYB proto-oncogene, transcription factor                         |
| 411 | 218966_at    | MYO5C            | 10.811526 | 11.793398  | -5.6067893 | 5.99E-09 | myosin VC                                                        |
| 412 | 214156_at    | MYRIP            | 27.765177 | 40.535675  | -2.9825724 | 1.20E-16 | myosin VIIA and Rab interacting protein                          |
| 413 | 204823_at    | NAV3             | 11.189886 | -12.117154 | 2.8591621  | 4.15E-09 | neuron navigator 3                                               |
| 414 | 213325_at    | NECTIN3          | 29.538484 | -47.246505 | 4.650027   | 1.25E-17 | nectin cell adhesion molecule 3                                  |
| 415 | 227503_at    | NECTIN3          | 20.396365 | -23.177044 | 3.5960006  | 4.34E-13 | nectin cell adhesion molecule 3                                  |
| 416 | 241310_at    | NEK5             | 10.862867 | 11.836887  | -2.047373  | 5.70E-09 | NIMA related kinase 5                                            |
| 417 | 217722_s_at  | NGRN             | 10.344587 | 11.404082  | -1.0404578 | 9.42E-09 | neugrin, neurite outgrowth associated                            |
| 418 | 225911_at    | NPNT             | 28.475612 | 43.040357  | -5.2494323 | 4.96E-17 | nephronectin                                                     |
| 419 | 244747_at    | NPNT             | 10.747907 | 11.739698  | -1.0440685 | 6.37E-09 | nephronectin                                                     |
| 420 | 205440_s_at  | NPY1R            | 12.047058 | 12.879506  | -5.9371482 | 1.80E-09 | neuropeptide Y receptor Y1                                       |
| 421 | 226499_at    | NRARP            | 10.675609 | 11.678926  | -1.9574159 | 6.83E-09 | NOTCH-regulated ankyrin repeat protein                           |
| 422 | 202599_s_at  | NRIP1            | 11.888985 | 12.735807  | -2.531276  | 2.10E-09 | nuclear receptor interacting protein 1                           |
| 423 | 202600_s_at  | NRIP1            | 10.299813 | 11.367329  | -2.7621125 | 9.83E-09 | nuclear receptor interacting protein 1                           |
| 424 | 212298_at    | NRP1             | 10.722997 | -11.718729 | 5.2206159  | 6.53E-09 | neuropilin 1                                                     |
| 425 | 203939_at    | NTSE             | 15.202583 | -16.080858 | 6.9884239  | 8.17E-11 | 5'-nucleotidase ecto                                             |
| 426 | 1553995_a_at | NTSE             | 10.330728 | -11.392695 | 5.0239851  | 9.54E-09 | 5'-nucleotidase ecto                                             |
| 427 | 204589_at    | NUAK1            | 13.082834 | -13.85793  | 3.4494194  | 6.56E-10 | NUAK family kinase 1                                             |
| 428 | 214136_at    | NUDT13           | 10.995046 | 11.949487  | -1.9010647 | 5.01E-09 | nudix hydrolase 13                                               |
| 429 | 224477_s_at  | NUDT16L1         | 13.068439 | 13.843878  | -1.0409256 | 6.65E-10 | nudix hydrolase 16 like 1                                        |
| 430 | 205729_at    | OSMR             | 16.308472 | -17.374729 | 3.7321606  | 2.73E-11 | oncostatin M receptor                                            |
| 431 | 226621_at    | OSMR             | 15.264995 | -16.15126  | 3.4857854  | 7.68E-11 | oncostatin M receptor                                            |
| 432 | 218717_s_at  | P3H2             | 13.075348 | -13.850621 | 4.5857893  | 6.61E-10 | prolyl 3-hydroxylase 2                                           |
| 433 | 225622_at    | PAG1             | 13.02339  | -13.799988 | 2.0204844  | 6.95E-10 | phosphoprotein membrane anchor with glycosphingolipid microdom   |

|     |              |                 |           |            |            |          |                                                                        |
|-----|--------------|-----------------|-----------|------------|------------|----------|------------------------------------------------------------------------|
| 434 | 225626_at    | PAG1            | 12.759739 | -13.545685 | 2.7577412  | 9.00E-10 | phosphoprotein membrane anchor with glycosphingolipid microdom         |
| 435 | 227354_at    | PAG1            | 12.115391 | -12.942073 | 1.9692558  | 1.69E-09 | phosphoprotein membrane anchor with glycosphingolipid microdom         |
| 436 | 231878_at    | PAGR1           | 15.044949 | 15.904382  | -1.4481528 | 9.55E-11 | PAXIP1 associated glutamate rich protein 1                             |
| 437 | 221868_at    | PAIP2B          | 13.613824 | 14.38562   | -1.6132538 | 3.90E-10 | poly(A) binding protein interacting protein 2B                         |
| 438 | 226694_at    | PALM2-AKAP2///A | 17.360411 | -18.703226 | 6.2212897  | 9.54E-12 | PALM2-AKAP2 readthrough///A-kinase anchoring protein 2                 |
| 439 | 202760_s_at  | PALM2-AKAP2///A | 16.370197 | -17.449949 | 5.4447089  | 2.57E-11 | PALM2-AKAP2 readthrough///A-kinase anchoring protein 2                 |
| 440 | 202759_s_at  | PALM2-AKAP2///A | 11.903308 | -12.748769 | 5.069356   | 2.07E-09 | PALM2-AKAP2 readthrough///A-kinase anchoring protein 2                 |
| 441 | 214620_x_at  | PAM             | 14.051336 | -14.834536 | 1.2346141  | 2.54E-10 | peptidylglycine alpha-amidating monooxygenase                          |
| 442 | 202336_s_at  | PAM             | 12.111362 | -12.938376 | 1.494799   | 1.69E-09 | peptidylglycine alpha-amidating monooxygenase                          |
| 443 | 212958_x_at  | PAM             | 10.665837 | -11.670733 | 1.308302   | 6.90E-09 | peptidylglycine alpha-amidating monooxygenase                          |
| 444 | 227626_at    | PAQR8           | 11.509133 | -12.396305 | 2.1621505  | 3.04E-09 | progesterin and adipoQ receptor family member 8                        |
| 445 | 223435_s_at  | PCDHA1///PCDHA2 | 31.06765  | 54.554376  | -5.7973278 | 1.49E-18 | protocadherin alpha 1///protocadherin alpha 2///protocadherin alpha    |
| 446 | 224212_s_at  | PCDHA1///PCDHA2 | 25.072386 | 32.705429  | -3.4381988 | 2.84E-15 | protocadherin alpha 1///protocadherin alpha 2///protocadherin alpha    |
| 447 | 210674_s_at  | PCDHA1///PCDHA2 | 21.776629 | 25.595042  | -4.8004132 | 1.02E-13 | protocadherin alpha 1///protocadherin alpha 2///protocadherin alpha    |
| 448 | 210907_s_at  | PDCD10          | 12.071394 | 12.901757  | -0.8835612 | 1.76E-09 | programmed cell death 10                                               |
| 449 | 204491_at    | PDE4D           | 11.122656 | -12.059071 | 2.3380143  | 4.43E-09 | phosphodiesterase 4D                                                   |
| 450 | 218273_s_at  | PDP1            | 14.875501 | -15.716794 | 4.1064473  | 1.13E-10 | pyruvate dehydrogenase phosphatase catalytic subunit 1                 |
| 451 | 222572_at    | PDP1            | 11.583894 | -12.462485 | 4.17752    | 2.83E-09 | pyruvate dehydrogenase phosphatase catalytic subunit 1                 |
| 452 | 202658_at    | PEX11B          | 17.295533 | 18.618339  | -1.84208   | 1.02E-11 | peroxisomal biogenesis factor 11 beta                                  |
| 453 | 207132_x_at  | PFDN5           | 18.248718 | 19.907191  | -1.3907832 | 3.90E-12 | prefoldin subunit 5                                                    |
| 454 | 210908_s_at  | PFDN5           | 17.26567  | 18.5794    | -1.336261  | 1.05E-11 | prefoldin subunit 5                                                    |
| 455 | 228554_at    | PGR             | 15.951202 | 16.945737  | -7.2788333 | 3.89E-11 | progesterone receptor                                                  |
| 456 | 223470_at    | PIGM            | 12.990229 | 13.767763  | -2.154159  | 7.18E-10 | phosphatidylinositol glycan anchor biosynthesis class M                |
| 457 | 204484_at    | PIK3C2B         | 10.450986 | 11.49182   | -1.992379  | 8.49E-09 | phosphatidylinositol-4-phosphate 3-kinase catalytic subunit type 2 b   |
| 458 | 203879_at    | PIK3CD          | 12.689863 | -13.479011 | 1.9947499  | 9.63E-10 | phosphatidylinositol-4,5-bisphosphate 3-kinase catalytic subunit delt  |
| 459 | 213111_at    | PIKFYVE         | 10.527264 | -11.555071 | 1.0287194  | 7.89E-09 | phosphoinositide kinase, FYVE-type zinc finger containing              |
| 460 | 218667_at    | PJA1            | 11.933681 | -12.776293 | 1.4056967  | 2.01E-09 | praja ring finger ubiquitin ligase 1                                   |
| 461 | 209873_s_at  | PKP3            | 11.197166 | 12.123458  | -1.3666247 | 4.12E-09 | plakophilin 3                                                          |
| 462 | 210845_s_at  | PLAUR           | 15.952948 | -16.947807 | 3.3841642  | 3.89E-11 | plasminogen activator, urokinase receptor                              |
| 463 | 211924_s_at  | PLAUR           | 11.316659 | -12.22734  | 2.592455   | 3.67E-09 | plasminogen activator, urokinase receptor                              |
| 464 | 205093_at    | PLEKHA6         | 10.979218 | 11.935956  | -1.7253838 | 5.09E-09 | pleckstrin homology domain containing A6                               |
| 465 | 222699_s_at  | PLEKHF2         | 17.220996 | 18.521308  | -2.5896233 | 1.10E-11 | pleckstrin homology and FYVE domain containing 2                       |
| 466 | 218640_s_at  | PLEKHF2         | 16.863917 | 18.06367   | -2.4826408 | 1.57E-11 | pleckstrin homology and FYVE domain containing 2                       |
| 467 | 225727_at    | PLEKHH1         | 16.907828 | 18.119312  | -3.1261321 | 1.50E-11 | pleckstrin homology, MyTH4 and FERM domain containing H1               |
| 468 | 225726_s_at  | PLEKHH1         | 11.884314 | 12.731582  | -3.9797054 | 2.11E-09 | pleckstrin homology, MyTH4 and FERM domain containing H1               |
| 469 | 201215_at    | PLS3            | 16.361595 | -17.439447 | 1.8592975  | 2.59E-11 | plastin 3                                                              |
| 470 | 242201_at    | PMS2P5          | 10.734026 | 11.728009  | -2.0948776 | 6.46E-09 | PMS1 homolog 2, mismatch repair system component pseudogene 5          |
| 471 | 239699_s_at  | PMS2P5///PMS2P1 | 14.337791 | 15.135638  | -2.0039674 | 1.92E-10 | PMS1 homolog 2, mismatch repair system component pseudogene 5          |
| 472 | 209598_at    | PNMA2           | 26.057485 | -35.308136 | 5.3491979  | 9.20E-16 | paraneoplastic Ma antigen 2                                            |
| 473 | 218824_at    | PNMAL1          | 19.09443  | -21.130342 | 4.461807   | 1.65E-12 | paraneoplastic Ma antigen family like 1                                |
| 474 | 233772_at    | POU6F2-AS2      | 20.958758 | 24.129128  | -3.6620458 | 2.42E-13 | POU6F2 antisense RNA 2                                                 |
| 475 | 216347_s_at  | PPP1R13B        | 15.539903 | 16.465     | -1.8676687 | 5.85E-11 | protein phosphatase 1 regulatory subunit 13B                           |
| 476 | 224927_at    | PPP1R18         | 13.89908  | -14.676828 | 3.1248569  | 2.95E-10 | protein phosphatase 1 regulatory subunit 18                            |
| 477 | 228010_at    | PPP2R2C         | 14.24636  | 15.038902  | -3.5484748 | 2.10E-10 | protein phosphatase 2 regulatory subunit Bgamma                        |
| 478 | 224909_s_at  | PREX1           | 25.112365 | 32.806027  | -5.3330808 | 2.71E-15 | phosphatidylinositol-3,4,5-trisphosphate dependent Rac exchange fa     |
| 479 | 224925_at    | PREX1           | 17.111636 | 18.379891  | -5.0154208 | 1.22E-11 | phosphatidylinositol-3,4,5-trisphosphate dependent Rac exchange fa     |
| 480 | 226065_at    | PRICKLE1        | 13.13726  | -13.911177 | 2.8732128  | 6.22E-10 | prickle planar cell polarity protein 1                                 |
| 481 | 226069_at    | PRICKLE1        | 12.891577 | -13.672305 | 3.0509377  | 7.91E-10 | prickle planar cell polarity protein 1                                 |
| 482 | 213093_at    | PRKCA           | 27.48818  | -39.616549 | 4.971155   | 1.69E-16 | protein kinase C alpha                                                 |
| 483 | 213010_at    | PRKCDBP         | 12.082941 | -12.912327 | 4.0565445  | 1.74E-09 | protein kinase C delta binding protein                                 |
| 484 | 206099_at    | PRKCH           | 16.472594 | -17.575463 | -1.7368617 | 2.32E-11 | protein kinase C eta                                                   |
| 485 | 218764_at    | PRKCH           | 13.240009 | 14.012218  | -3.423901  | 5.63E-10 | protein kinase C eta                                                   |
| 486 | 213847_at    | PRPH            | 13.608716 | 14.380456  | -1.5601655 | 3.92E-10 | peripherin                                                             |
| 487 | 226961_at    | PRR15           | 22.441278 | 26.863587  | -3.1282186 | 5.06E-14 | proline rich 15                                                        |
| 488 | 219127_at    | PRR15L          | 13.525758 | 14.296822  | -3.1223303 | 4.25E-10 | proline rich 15 like                                                   |
| 489 | 37117_at     | PRR5-ARHGAP8/// | 15.227883 | 16.10936   | -3.7763521 | 7.97E-11 | PRR5-ARHGAP8 readthrough///Rho GTPase activating protein 8             |
| 490 | 205980_s_at  | PRR5-ARHGAP8/// | 12.490063 | 13.290017  | -3.3135102 | 1.17E-09 | PRR5-ARHGAP8 readthrough///Rho GTPase activating protein 8             |
| 491 | 202525_at    | PRSS8           | 21.770358 | 25.583414  | -3.8444192 | 1.03E-13 | protease, serine 8                                                     |
| 492 | 216088_s_at  | PSMA7           | 11.002427 | -11.955803 | 1.0428174  | 4.98E-09 | proteasome subunit alpha 7                                             |
| 493 | 204279_at    | PSMB9           | 15.754171 | -16.713719 | 3.4404506  | 4.73E-11 | proteasome subunit beta 9                                              |
| 494 | 231828_at    | PSMD5-AS1       | 13.293416 | 14.065006  | -2.6331516 | 5.34E-10 | PSMD5 antisense RNA 1 (head to head)                                   |
| 495 | 208790_s_at  | PTRF            | 23.708546 | -29.498809 | 3.8294206  | 1.29E-14 | polymerase I and transcript release factor                             |
| 496 | 1557938_s_at | PTRF            | 19.093466 | -21.128903 | 3.7172233  | 1.65E-12 | polymerase I and transcript release factor                             |
| 497 | 208789_at    | PTRF            | 18.322017 | -20.010132 | 3.7744405  | 3.62E-12 | polymerase I and transcript release factor                             |
| 498 | 214443_at    | PVR             | 19.531466 | -21.794192 | 1.8710799  | 1.06E-12 | poliovirus receptor                                                    |
| 499 | 32699_s_at   | PVR             | 14.421183 | -15.224388 | 1.292476   | 1.77E-10 | poliovirus receptor                                                    |
| 500 | 216283_s_at  | PVR             | 14.301238 | -15.096892 | 1.9063692  | 1.99E-10 | poliovirus receptor                                                    |
| 501 | 214444_x_at  | PVR             | 13.811536 | -14.58687  | 1.2529348  | 3.21E-10 | poliovirus receptor                                                    |
| 502 | 212662_at    | PVR             | 11.066915 | -12.011098 | 1.955722   | 4.67E-09 | poliovirus receptor                                                    |
| 503 | 227332_at    | PXN-AS1         | 11.171832 | 12.101532  | -1.8401931 | 4.22E-09 | PXN antisense RNA 1                                                    |
| 504 | 234998_at    | RAB11A          | 12.544447 | 13.341219  | -1.3663991 | 1.11E-09 | RAB11A, member RAS oncogene family                                     |
| 505 | 221810_at    | RAB15           | 14.96783  | 15.818737  | -1.6307431 | 1.03E-10 | RAB15, member RAS oncogene family                                      |
| 506 | 59697_at     | RAB15           | 12.212357 | 13.031324  | -1.4936123 | 1.53E-09 | RAB15, member RAS oncogene family                                      |
| 507 | 218931_at    | RAB17           | 16.961673 | 18.187783  | -2.7203092 | 1.42E-11 | RAB17, member RAS oncogene family                                      |
| 508 | 218186_at    | RAB25           | 33.999954 | 75.842349  | -6.5666748 | 1.12E-20 | RAB25, member RAS oncogene family                                      |
| 509 | 219562_at    | RAB26           | 20.37768  | 23.146152  | -2.694553  | 4.42E-13 | RAB26, member RAS oncogene family                                      |
| 510 | 50965_at     | RAB26           | 16.751647 | 17.922201  | -2.0028532 | 1.75E-11 | RAB26, member RAS oncogene family                                      |
| 511 | 204028_s_at  | RABGAP1         | 10.647041 | 11.654987  | -1.1191388 | 7.02E-09 | RAB GTPase activating protein 1                                        |
| 512 | 202052_s_at  | RAI14           | 12.39869  | -13.204391 | 3.0853588  | 1.28E-09 | retinoic acid induced 14                                               |
| 513 | 213049_at    | RALGAPA1        | 16.000529 | 17.004326  | -1.7879455 | 3.71E-11 | Ral GTPase activating protein catalytic alpha subunit 1                |
| 514 | 214855_s_at  | RALGAPA1///RALG | 16.142759 | 17.174404  | -1.8821451 | 3.22E-11 | Ral GTPase activating protein catalytic alpha subunit 1///Ral GTPase ; |
| 515 | 1553986_at   | RASEF           | 12.133856 | 12.959026  | -3.6197615 | 1.66E-09 | RAS and EF-hand domain containing                                      |
| 516 | 230563_at    | RASGEF1A        | 16.465084 | 17.566226  | -4.670904  | 2.33E-11 | RasGEF domain family member 1A                                         |
| 517 | 200997_at    | RBM14-RBM4///RB | 13.407725 | 14.178615  | -1.059422  | 4.77E-10 | RBM14-RBM4 readthrough///RNA binding motif protein 4                   |
| 518 | 238447_at    | RBMS3           | 12.056555 | -12.888185 | 5.1211504  | 1.79E-09 | RNA binding motif single stranded interacting protein 3                |
| 519 | 205407_at    | RECK            | 21.137675 | -24.441327 | 3.1344944  | 2.00E-13 | reversion inducing cysteine rich protein with kazal motifs             |
| 520 | 205205_at    | RELB            | 13.524143 | -14.295199 | 1.9854199  | 4.26E-10 | RELB proto-oncogene, NF-kB subunit                                     |

|     |              |                   |           |            |            |          |                                                                         |
|-----|--------------|-------------------|-----------|------------|------------|----------|-------------------------------------------------------------------------|
| 521 | 227758_at    | RERG              | 13.245161 | 14.017302  | -5.0595571 | 5.60E-10 | RAS like estrogen regulated growth inhibitor                            |
| 522 | 244745_at    | RERG              | 10.569351 | 11.590096  | -4.5648915 | 7.57E-09 | RAS like estrogen regulated growth inhibitor                            |
| 523 | 227339_at    | RGMB              | 14.486639 | -15.2944   | 1.3602611  | 1.66E-10 | repulsive guidance molecule family member b                             |
| 524 | 210138_at    | RGS20             | 11.887574 | -12.734531 | 3.6503875  | 2.11E-09 | regulator of G-protein signaling 20                                     |
| 525 | 212099_at    | RHOB              | 16.180339 | 17.219628  | -3.8854469 | 3.10E-11 | ras homolog family member B                                             |
| 526 | 1553962_s_at | RHOB              | 11.109732 | 12.047934  | -2.2279887 | 4.48E-09 | ras homolog family member B                                             |
| 527 | 60471_at     | RIN3              | 13.155857 | -13.929414 | 1.6438162  | 6.11E-10 | Ras and Rab interactor 3                                                |
| 528 | 219457_s_at  | RIN3              | 11.97617  | -12.814886 | 1.0245206  | 1.93E-09 | Ras and Rab interactor 3                                                |
| 529 | 214519_s_at  | RLN2              | 17.08518  | 18.345848  | -3.5560006 | 1.26E-11 | relaxin 2                                                               |
| 530 | 229285_at    | RNASEL            | 14.447345 | 15.252333  | -2.0248412 | 1.72E-10 | ribonuclease L                                                          |
| 531 | 214857_at    | RPARP-AS1         | 10.771619 | 11.759689  | -1.6754966 | 6.22E-09 | RPARP antisense RNA 1                                                   |
| 532 | 238026_at    | RPL35A            | 11.922691 | 12.766328  | -1.3122051 | 2.03E-09 | ribosomal protein L35a                                                  |
| 533 | 208456_s_at  | RRAS2             | 11.074135 | -12.017302 | 1.9113189  | 4.64E-09 | related RAS viral (r-ras) oncogene homolog 2                            |
| 534 | 203594_at    | RTCA              | 13.96252  | -14.742345 | 2.114359   | 2.77E-10 | RNA 3'-terminal phosphate cyclase                                       |
| 535 | 205464_at    | SCNN1B            | 10.367579 | 11.422993  | -1.0531509 | 9.21E-09 | sodium channel epithelial 1 beta subunit                                |
| 536 | 218981_at    | SDHAF3            | 25.925732 | -34.944385 | 3.4899883  | 1.07E-15 | succinate dehydrogenase complex assembly factor 3                       |
| 537 | 223299_at    | SEC11C            | 13.330345 | 14.101616  | -1.142259  | 5.15E-10 | SEC11 homolog C, signal peptidase complex subunit                       |
| 538 | 203789_s_at  | SEMA3C            | 12.948432 | 13.727245  | -1.8751772 | 7.48E-10 | semaphorin 3C                                                           |
| 539 | 219259_at    | SEMA4A            | 16.569061 | 17.694547  | -1.3592171 | 2.11E-11 | semaphorin 4A                                                           |
| 540 | 201427_s_at  | SEPP1             | 11.91298  | 12.757528  | -6.5732804 | 2.05E-09 | selenoprotein P, plasma, 1                                              |
| 541 | 200969_at    | SERP1             | 10.930851 | 11.894687  | -1.5086351 | 5.33E-09 | stress-associated endoplasmic reticulum protein 1                       |
| 542 | 202627_s_at  | SERPINE1          | 20.697645 | -23.681664 | 6.2096836  | 3.17E-13 | serpin family E member 1                                                |
| 543 | 202628_s_at  | SERPINE1          | 20.454558 | -23.273556 | 5.0139585  | 4.08E-13 | serpin family E member 1                                                |
| 544 | 205120_s_at  | SGCB              | 14.902389 | 15.746416  | 2.7400616  | 1.10E-10 | sarcoglycan beta                                                        |
| 545 | 228584_at    | SGCB              | 12.201213 | -13.021039 | 2.4099825  | 1.55E-09 | sarcoglycan beta                                                        |
| 546 | 226112_at    | SGCB              | 10.883816 | -11.854672 | 2.1494305  | 5.58E-09 | sarcoglycan beta                                                        |
| 547 | 201739_at    | SGK1              | 10.631299 | -11.641814 | 3.8333867  | 7.13E-09 | serum/glucocorticoid regulated kinase 1                                 |
| 548 | 209090_s_at  | SH3GLB1           | 15.130204 | -15.99959  | 1.5723252  | 8.78E-11 | SH3 domain containing GRB2 like endophilin B1                           |
| 549 | 224817_at    | SH3PXD2A          | 18.206784 | -19.848553 | 2.9373625  | 4.07E-12 | SH3 and PX domains 2A                                                   |
| 550 | 243681_at    | SHANK2            | 14.551934 | 15.364549  | -3.2316524 | 1.55E-10 | SH3 and multiple ankyrin repeat domains 2                               |
| 551 | 213307_at    | SHANK2            | 12.036097 | 12.869494  | -3.1244243 | 1.82E-09 | SH3 and multiple ankyrin repeat domains 2                               |
| 552 | 242335_at    | SLC25A37          | 20.228409 | -22.901011 | 2.4630715  | 5.16E-13 | solute carrier family 25 member 37                                      |
| 553 | 225258_s_at  | SLC25A37          | 16.931977 | -18.149988 | 2.7861069  | 1.47E-11 | solute carrier family 25 member 37                                      |
| 554 | 218136_s_at  | SLC25A37          | 13.991619 | -14.77249  | 1.9673433  | 2.69E-10 | solute carrier family 25 member 37                                      |
| 555 | 226179_at    | SLC25A37          | 13.902541 | -14.680395 | 2.3232386  | 2.94E-10 | solute carrier family 25 member 37                                      |
| 556 | 221920_s_at  | SLC25A37          | 12.996503 | -13.773855 | 2.5463957  | 7.14E-10 | solute carrier family 25 member 37                                      |
| 557 | 222529_at    | SLC25A37          | 12.935687 | -13.714911 | 2.522345   | 7.58E-10 | solute carrier family 25 member 37                                      |
| 558 | 232092_at    | SLC25A51          | 13.416148 | -14.187019 | 1.3017131  | 4.73E-10 | solute carrier family 25 member 51                                      |
| 559 | 219125_s_at  | SLC50A1           | 13.601254 | 14.372915  | -1.355083  | 3.95E-10 | solute carrier family 50 member 1                                       |
| 560 | 201349_at    | SLC9A3R1          | 16.713746 | 17.8747    | -3.677347  | 1.82E-11 | SLC9A3 regulator 1                                                      |
| 561 | 209607_x_at  | SLX1B-SULT1A4///S | 10.959258 | 11.91891   | -1.878766  | 5.19E-09 | SLX1B-SULT1A4 readthrough (NMD candidate)///SLX1A-SULT1A3 readthrough   |
| 562 | 213139_at    | SNAI2             | 15.258983 | -16.144465 | 6.2458933  | 7.73E-11 | snail family transcriptional repressor 2                                |
| 563 | 229050_s_at  | SNORA17B///SNOF   | 10.786276 | 11.772059  | -3.1597541 | 6.14E-09 | small nucleolar RNA, H/ACA box 17B///small nucleolar RNA, H/ACA box 17B |
| 564 | 209181_s_at  | SNORD45C///SNOF   | 10.450053 | -11.491048 | 1.1511676  | 8.50E-09 | small nucleolar RNA, C/D box 45C///small nucleolar RNA, C/D box 45C     |
| 565 | 205573_s_at  | SNX7              | 13.398255 | -14.16917  | 5.4995341  | 4.82E-10 | sorting nexin 7                                                         |
| 566 | 1552269_at   | SPATA17           | 12.415576 | 13.220178  | -2.6934506 | 1.26E-09 | spermatogenesis associated 17                                           |
| 567 | 214404_x_at  | SPDEF             | 16.324949 | 17.394776  | -3.2765973 | 2.68E-11 | SAM pointed domain containing ETS transcription factor                  |
| 568 | 220192_x_at  | SPDEF             | 15.496578 | 16.415159  | -3.8824207 | 6.11E-11 | SAM pointed domain containing ETS transcription factor                  |
| 569 | 243594_x_at  | SPIRE2            | 11.629762 | 12.503242  | -1.2572176 | 2.71E-09 | spire type actin nucleation factor 2                                    |
| 570 | 203433_at    | ST20-MTHFS///MTF  | 13.04682  | 13.8228    | -1.1305997 | 6.80E-10 | ST20-MTHFS readthrough///5,10-methylenetetrahydrofolate synthetase      |
| 571 | 223103_at    | STARD10           | 11.297081 | 12.210267  | -3.5480853 | 3.74E-09 | StAR related lipid transfer domain containing 10                        |
| 572 | 226525_at    | STK17B            | 14.463338 | -15.269442 | 2.5199852  | 1.69E-10 | serine/threonine kinase 17b                                             |
| 573 | 213434_at    | STX2              | 15.285077 | -16.173978 | 1.3381317  | 7.53E-11 | syntaxin 2                                                              |
| 574 | 233841_s_at  | SUDS3             | 12.741247 | 13.528011  | -1.6963682 | 9.16E-10 | SUDS3 homolog, SIN3A corepressor complex component                      |
| 575 | 203615_x_at  | SULT1A1           | 17.338027 | 18.673893  | -2.1524756 | 9.76E-12 | sulfotransferase family 1A member 1                                     |
| 576 | 215299_x_at  | SULT1A1           | 13.679418 | 14.452097  | -2.3486092 | 3.66E-10 | sulfotransferase family 1A member 1                                     |
| 577 | 211385_x_at  | SULT1A2           | 11.294048 | 12.207623  | -1.3539819 | 3.75E-09 | sulfotransferase family 1A member 2                                     |
| 578 | 207122_x_at  | SULT1A2           | 11.089497 | 12.030513  | -1.172024  | 4.57E-09 | sulfotransferase family 1A member 2                                     |
| 579 | 227352_at    | SWSAP1            | 11.695546 | 12.561902  | -1.4332428 | 2.54E-09 | SWIM-type zinc finger 7 associated protein 1                            |
| 580 | 44702_at     | SYDE1             | 12.071294 | -12.901665 | 1.7269294  | 1.76E-09 | synapse defective Rho GTPase homolog 1                                  |
| 581 | 226068_at    | SYK               | 18.717149 | 20.574961  | -1.7815894 | 2.43E-12 | spleen associated tyrosine kinase                                       |
| 582 | 235515_at    | SYNE4             | 21.02516  | 24.244457  | -3.1078907 | 2.26E-13 | spectrin repeat containing nuclear envelope family member 4             |
| 583 | 212730_at    | SYNM              | 20.743878 | -23.760197 | 3.0701798  | 3.02E-13 | synemin                                                                 |
| 584 | 229053_at    | SYT17             | 13.622537 | 14.394434  | -3.2214545 | 3.87E-10 | synaptotagmin 17                                                        |
| 585 | 205613_at    | SYT17             | 12.897312 | 13.677837  | -2.4387023 | 7.86E-10 | synaptotagmin 17                                                        |
| 586 | 227134_at    | SYTL1             | 10.712629 | 11.710011  | -3.3251762 | 6.59E-09 | synaptotagmin like 1                                                    |
| 587 | 213912_at    | TBC1D30           | 28.164551 | 41.916378  | -3.5771733 | 7.33E-17 | TBC1 domain family member 30                                            |
| 588 | 213913_s_at  | TBC1D30           | 23.381413 | 28.789327  | -3.7460158 | 1.84E-14 | TBC1 domain family member 30                                            |
| 589 | 221194_s_at  | TBC1D3P1-DHX40P   | 15.466865 | 16.381062  | -1.8735845 | 6.29E-11 | TBC1D3P1-DHX40P readthrough, transcribed pseudogene///ring finger       |
| 590 | 234970_at    | TC2N              | 26.506398 | 36.586864  | -3.2495714 | 5.45E-16 | tandem C2 domains, nuclear                                              |
| 591 | 1553132_a_at | TC2N              | 19.933817 | 22.425711  | -4.3939997 | 6.99E-13 | tandem C2 domains, nuclear                                              |
| 592 | 231104_at    | TDRD5             | 17.14624  | 18.424517  | -2.0115843 | 1.18E-11 | tudor domain containing 5                                               |
| 593 | 205287_s_at  | TFAP2C            | 11.211645 | 12.136004  | -3.1051516 | 4.06E-09 | transcription factor AP-2 gamma                                         |
| 594 | 204623_at    | TFF3              | 14.948021 | 15.796811  | -5.7037963 | 1.05E-10 | trefoil factor 3                                                        |
| 595 | 209651_at    | TGFB11            | 16.025646 | -17.034237 | 5.3717033  | 3.62E-11 | transforming growth factor beta 1 induced transcript 1                  |
| 596 | 35148_at     | TJP3              | 15.961127 | 16.957509  | -1.7631573 | 3.85E-11 | tight junction protein 3                                                |
| 597 | 213412_at    | TJP3              | 14.030658 | 14.813023  | -1.7327656 | 2.59E-10 | tight junction protein 3                                                |
| 598 | 223892_s_at  | TMBIM4            | 20.028697 | 22.577578  | -1.6803623 | 6.34E-13 | transmembrane BAX inhibitor motif containing 4                          |
| 599 | 222845_x_at  | TMBIM4            | 19.978806 | 22.49758   | -1.6480663 | 6.67E-13 | transmembrane BAX inhibitor motif containing 4                          |
| 600 | 226403_at    | TMC4              | 16.186162 | 17.226646  | -3.3884065 | 3.08E-11 | transmembrane channel like 4                                            |
| 601 | 225822_at    | TMEM125           | 15.07823  | 15.941482  | -3.2821257 | 9.24E-11 | transmembrane protein 125                                               |
| 602 | 213338_at    | TMEM158           | 21.20505  | -24.560094 | 5.9663916  | 1.87E-13 | transmembrane protein 158 (gene/pseudogene)                             |
| 603 | 227544_at    | TMEM229B          | 16.325524 | 17.395476  | -1.6972558 | 2.68E-11 | transmembrane protein 229B                                              |
| 604 | 213285_at    | TMEM30B           | 29.75992  | 48.203186  | -5.7095771 | 9.30E-18 | transmembrane protein 30B                                               |
| 605 | 228834_at    | TOB1              | 19.416244 | 21.616979  | -3.5936519 | 1.19E-12 | transducer of ERBB2, 1                                                  |
| 606 | 202704_at    | TOB1              | 18.762183 | 20.640415  | -3.1457045 | 2.32E-12 | transducer of ERBB2, 1                                                  |
| 607 | 221897_at    | TRIM52            | 12.192444 | 13.01295   | -1.6024003 | 1.56E-09 | tripartite motif containing 52                                          |

|     |              |                |           |            |            |          |                                                              |
|-----|--------------|----------------|-----------|------------|------------|----------|--------------------------------------------------------------|
| 608 | 217979_at    | TSPAN13        | 16.433666 | 17.527638  | -5.8931914 | 2.41E-11 | tetraspanin 13                                               |
| 609 | 203226_s_at  | TSPAN31        | 10.535354 | 11.561796  | -1.5150637 | 7.83E-09 | tetraspanin 31                                               |
| 610 | 225388_at    | TSPAN5         | 15.473501 | -16.388671 | 2.6367413  | 6.25E-11 | tetraspanin 5                                                |
| 611 | 225387_at    | TSPAN5         | 12.628699 | -13.420897 | 2.6703998  | 1.02E-09 | tetraspanin 5                                                |
| 612 | 1554588_a_at | TTC30B         | 12.657468 | 13.448203  | -1.7696486 | 9.94E-10 | tetratricopeptide repeat domain 30B                          |
| 613 | 243413_at    | TTC30B         | 11.335253 | 12.243574  | -1.7908183 | 3.60E-09 | tetratricopeptide repeat domain 30B                          |
| 614 | 210652_s_at  | TTC39A         | 23.084172 | 28.162834  | -5.2083505 | 2.54E-14 | tetratricopeptide repeat domain 39A                          |
| 615 | 219415_at    | TTYH1          | 13.659799 | 14.432184  | -1.5418903 | 3.73E-10 | tweety family member 1                                       |
| 616 | 204141_at    | TUBB2A         | 12.910279 | -13.690354 | 4.096885   | 7.77E-10 | tubulin beta 2A class IIa                                    |
| 617 | 209372_x_at  | TUBB2B//TUBB2A | 15.820161 | -16.791071 | 1.9204475  | 4.43E-11 | tubulin beta 2B class IIb//tubulin beta 2A class IIa         |
| 618 | 209191_at    | TUBB6          | 16.291611 | -17.354238 | 2.7597603  | 2.78E-11 | tubulin beta 6 class V                                       |
| 619 | 205694_at    | TYRP1          | 24.257558 | 30.739273  | -5.0840875 | 7.04E-15 | tyrosinase related protein 1                                 |
| 620 | 209115_at    | UBA3           | 11.188044 | -12.115559 | 0.961292   | 4.16E-09 | ubiquitin like modifier activating enzyme 3                  |
| 621 | 238462_at    | UBASH3B        | 15.25894  | -16.144417 | 3.9638467  | 7.73E-11 | ubiquitin associated and SH3 domain containing B             |
| 622 | 225982_at    | UBTF           | 10.902256 | 11.870346  | -1.113833  | 5.48E-09 | upstream binding transcription factor, RNA polymerase I      |
| 623 | 214843_s_at  | USP33          | 19.43834  | -21.650841 | 1.2343894  | 1.16E-12 | ubiquitin specific peptidase 33                              |
| 624 | 212513_s_at  | USP33          | 12.593836 | -13.387874 | 0.9856912  | 1.06E-09 | ubiquitin specific peptidase 33                              |
| 625 | 209946_at    | VEGFC          | 16.61844  | -17.755822 | 3.7571197  | 2.00E-11 | vascular endothelial growth factor C                         |
| 626 | 201426_s_at  | VIM            | 31.374398 | -56.249142 | 7.7055969  | 9.46E-19 | vimentin                                                     |
| 627 | 200611_s_at  | WDR1           | 12.389825 | -13.196111 | 1.8512587  | 1.29E-09 | WD repeat domain 1                                           |
| 628 | 210935_s_at  | WDR1           | 11.31274  | -12.22392  | 2.1971063  | 3.68E-09 | WD repeat domain 1                                           |
| 629 | 203855_at    | WDR47          | 12.016351 | -12.851478 | 1.2461254  | 1.86E-09 | WD repeat domain 47                                          |
| 630 | 213031_s_at  | WDR73          | 13.900778 | 14.678577  | -1.6823343 | 2.94E-10 | WD repeat domain 73                                          |
| 631 | 221029_s_at  | WNT5B          | 10.550815 | -11.574659 | 4.2621781  | 7.71E-09 | Wnt family member 5B                                         |
| 632 | 225665_at    | ZAK            | 15.16391  | -16.037384 | 2.924636   | 8.49E-11 | sterile alpha motif and leucine zipper containing kinase AZK |
| 633 | 225662_at    | ZAK            | 13.996597 | -14.777652 | 3.2226188  | 2.68E-10 | sterile alpha motif and leucine zipper containing kinase AZK |
| 634 | 223519_at    | ZAK            | 12.014268 | -12.849579 | 3.058014   | 1.86E-09 | sterile alpha motif and leucine zipper containing kinase AZK |
| 635 | 212774_at    | ZBTB18         | 23.42833  | -28.889773 | 5.5415922  | 1.75E-14 | zinc finger and BTB domain containing 18                     |
| 636 | 227162_at    | ZBTB26         | 14.147843 | 14.935332  | -1.4742206 | 2.31E-10 | zinc finger and BTB domain containing 26                     |
| 637 | 228216_at    | ZBTB37         | 14.032519 | 14.814958  | -1.4220669 | 2.59E-10 | zinc finger and BTB domain containing 37                     |
| 638 | 226962_at    | ZBTB41         | 11.92737  | 12.77057   | -1.4184288 | 2.03E-09 | zinc finger and BTB domain containing 41                     |
| 639 | 229691_at    | ZBTB42         | 13.8397   | 14.615754  | -3.0928603 | 3.13E-10 | zinc finger and BTB domain containing 42                     |
| 640 | 222731_at    | ZDHC2          | 25.839152 | -34.708095 | 4.9558584  | 1.18E-15 | zinc finger DHHC-type containing 2                           |
| 641 | 222730_s_at  | ZDHC2          | 10.38364  | -11.436219 | 3.2227036  | 9.07E-09 | zinc finger DHHC-type containing 2                           |
| 642 | 212764_at    | ZEB1           | 25.01655  | -32.565601 | 6.4264317  | 3.02E-15 | zinc finger E-box binding homeobox 1                         |
| 643 | 210875_s_at  | ZEB1           | 17.356636 | -18.698276 | 4.7004931  | 9.57E-12 | zinc finger E-box binding homeobox 1                         |
| 644 | 210275_s_at  | ZFAND5         | 17.76306  | -19.239171 | 1.2399169  | 6.36E-12 | zinc finger AN1-type containing 5                            |
| 645 | 217741_s_at  | ZFAND5         | 13.964627 | -14.744526 | 1.2949786  | 2.77E-10 | zinc finger AN1-type containing 5                            |
| 646 | 1555982_at   | ZFYVE16        | 11.264595 | 12.181983  | -2.1653668 | 3.86E-09 | zinc finger FYVE-type containing 16                          |
| 647 | 228058_at    | ZG16B          | 28.28397  | 42.342668  | -3.2163368 | 6.32E-17 | zymogen granule protein 16B                                  |
| 648 | 206314_at    | ZKSCAN7        | 12.457012 | -13.258987 | 1.1421062  | 1.21E-09 | zinc finger with KRAB and SCAN domains 7                     |
| 649 | 202136_at    | ZMYND11        | 11.382397 | 12.284821  | -1.373784  | 3.44E-09 | zinc finger MYND-type containing 11                          |
| 650 | 244743_x_at  | ZNF138         | 10.683127 | 11.685234  | -1.9887498 | 6.78E-09 | zinc finger protein 138                                      |
| 651 | 215022_x_at  | ZNF33B         | 11.597386 | 12.474461  | -2.5430855 | 2.79E-09 | zinc finger protein 33B                                      |
| 652 | 227952_at    | ZNF595         | 12.816457 | 13.600026  | -5.1886339 | 8.51E-10 | zinc finger protein 595                                      |
| 653 | 224593_at    | ZNF664         | 11.96133  | 12.801395  | -1.5811079 | 1.96E-09 | zinc finger protein 664                                      |
| 654 | 243729_at    |                | 21.082873 | 24.34521   | -2.7074102 | 2.12E-13 |                                                              |
| 655 | 231042_s_at  |                | 19.607906 | -21.912639 | 3.4687254  | 9.77E-13 |                                                              |
| 656 | 232113_at    |                | 19.317958 | -21.467066 | 4.9508479  | 1.31E-12 |                                                              |
| 657 | 238646_at    |                | 16.440434 | 17.535944  | -2.1786312 | 2.39E-11 |                                                              |
| 658 | 229223_at    |                | 16.072601 | 17.090296  | -3.1584458 | 3.45E-11 |                                                              |
| 659 | 233364_s_at  |                | 14.286613 | -15.081416 | 3.7924479  | 2.02E-10 |                                                              |
| 660 | 238946_at    |                | 14.069095 | 14.853036  | -1.3587647 | 2.50E-10 |                                                              |
| 661 | 242354_at    |                | 14.038138 | 14.820802  | -2.6862163 | 2.57E-10 |                                                              |
| 662 | 227943_at    |                | 12.616979 | 13.409787  | -3.1443151 | 1.03E-09 |                                                              |
| 663 | 239536_at    |                | 12.432501 | 13.236018  | -1.6090358 | 1.24E-09 |                                                              |
| 664 | 242909_at    |                | 12.26152  | 13.076787  | -2.5776077 | 1.46E-09 |                                                              |
| 665 | 236113_at    |                | 11.893441 | 12.739839  | -1.6868543 | 2.09E-09 |                                                              |
| 666 | 242874_at    |                | 11.446432 | 12.341039  | -1.9648303 | 3.23E-09 |                                                              |
| 667 | 236445_at    |                | 11.255899 | 12.174422  | -1.8635995 | 3.89E-09 |                                                              |
| 668 | 235247_at    |                | 11.114719 | 12.05223   | -3.5009944 | 4.46E-09 |                                                              |
| 669 | 1556938_a_at |                | 10.865967 | 11.839518  | -1.2398735 | 5.68E-09 |                                                              |
| 670 | 244475_at    |                | 10.70015  | 11.699524  | -1.565064  | 6.67E-09 |                                                              |
| 671 | 230795_at    |                | 10.405261 | 11.454045  | -3.697192  | 8.88E-09 |                                                              |
| 672 | 241429_at    |                | 10.376615 | 11.430432  | -1.0174526 | 9.13E-09 |                                                              |
